# Supplementary material for: RNA G-quadruplexes at upstream open reading frames cause DHX36- and DHX9-dependent translation of human mRNAs
Source: Genome Biol. 2018 Dec 27;19:229. doi: 10.1186/s13059-018-1602-2 (PMC6307142; doi:10.1186/s13059-018-1602-2)
Supplement: Supplementary file 5 — ORFscores for all putative uORF in non-treated, control, DHX36- and DHX9-depleted HeLa cells. (XLS 12540 kb) [file 13059_2018_1602_MOESM5_ESM.xls]

## Sheet: NT samples
uORF_id	TransID	uORFstart	uORFstop	frame1	frame2	frame3	uORFScore
ENST00000003912.7:115-175	ENST00000003912.7	115	175	8	0	1	3.77259
ENST00000003912.7:12-219	ENST00000003912.7	12	219	2	44	3	-6.15637
ENST00000003912.7:134-179	ENST00000003912.7	134	179	0	1	6	-3.30117
ENST00000003912.7:138-219	ENST00000003912.7	138	219	2	9	2	-3.09398
ENST00000003912.7:142-175	ENST00000003912.7	142	175	6	0	1	3.30117
ENST00000003912.7:153-219	ENST00000003912.7	153	219	2	8	2	-2.80735
ENST00000003912.7:160-175	ENST00000003912.7	160	175	2	0	1	1.58496
ENST00000003912.7:171-219	ENST00000003912.7	171	219	2	4	2	-1
ENST00000003912.7:175-199	ENST00000003912.7	175	199	1	2	1	-0.584963
ENST00000003912.7:181-199	ENST00000003912.7	181	199	1	2	0	-1.58496
ENST00000003912.7:193-199	ENST00000003912.7	193	199	1	2	0	-1.58496
ENST00000003912.7:2-74	ENST00000003912.7	2	74	1	0	13	-4.5502
ENST00000003912.7:201-219	ENST00000003912.7	201	219	0	2	0	-2.32193
ENST00000003912.7:22-88	ENST00000003912.7	22	88	15	1	0	4.77479
ENST00000003912.7:24-219	ENST00000003912.7	24	219	2	44	3	-6.15637
ENST00000003912.7:248-326	ENST00000003912.7	248	326	4	0	0	3.16993
ENST00000003912.7:251-326	ENST00000003912.7	251	326	4	0	0	3.16993
ENST00000003912.7:261-387	ENST00000003912.7	261	387	0	0	4	-3.16993
ENST00000003912.7:280-307	ENST00000003912.7	280	307	0	4	0	-3.16993
ENST00000003912.7:35-74	ENST00000003912.7	35	74	1	0	11	-4.2854
ENST00000003912.7:39-219	ENST00000003912.7	39	219	2	42	3	-6.07522
ENST00000003912.7:70-88	ENST00000003912.7	70	88	5	1	0	3
ENST00000003912.7:77-179	ENST00000003912.7	77	179	0	1	26	-5.62124
ENST00000003912.7:93-219	ENST00000003912.7	93	219	2	28	2	-5.43463
ENST00000005257.6:290-365	ENST00000005257.6	290	365	6	45	6	-5.7647
ENST00000005257.6:327-354	ENST00000005257.6	327	354	8	3	5	1.75489
ENST00000005257.6:51-354	ENST00000005257.6	51	354	9	4	7	1.53605
ENST00000005257.6:6-354	ENST00000005257.6	6	354	9	4	7	1.53605
ENST00000005257.6:87-354	ENST00000005257.6	87	354	9	4	7	1.53605
ENST00000005257.6:89-365	ENST00000005257.6	89	365	8	45	7	-5.58195
ENST00000005257.6:96-354	ENST00000005257.6	96	354	9	4	7	1.53605
ENST00000005257.6:99-354	ENST00000005257.6	99	354	9	4	7	1.53605
ENST00000005340.9:155-239	ENST00000005340.9	155	239	2	3	4	-0.736966
ENST00000005340.9:182-239	ENST00000005340.9	182	239	1	3	3	-1.09954
ENST00000005340.9:212-239	ENST00000005340.9	212	239	1	3	3	-1.09954
ENST00000007516.7:55-64	ENST00000007516.7	55	64	1	2	1	-0.584963
ENST00000008527.9:103-265	ENST00000008527.9	103	265	0	2	3	-1.926
ENST00000008527.9:194-236	ENST00000008527.9	194	236	2	2	0	1.58496
ENST00000008527.9:261-633	ENST00000008527.9	261	633	2	10	9	-2.6845
ENST00000008527.9:264-633	ENST00000008527.9	264	633	2	10	9	-2.6845
ENST00000008527.9:34-265	ENST00000008527.9	34	265	1	2	4	-1.58496
ENST00000008527.9:429-633	ENST00000008527.9	429	633	2	10	9	-2.6845
ENST00000008527.9:453-633	ENST00000008527.9	453	633	2	7	9	-2.41504
ENST00000008527.9:471-633	ENST00000008527.9	471	633	2	7	9	-2.41504
ENST00000008527.9:474-633	ENST00000008527.9	474	633	2	7	9	-2.41504
ENST00000008527.9:490-814	ENST00000008527.9	490	814	10	13	2	-3.13093
ENST00000008527.9:493-814	ENST00000008527.9	493	814	10	13	0	-3.71006
ENST00000008527.9:502-814	ENST00000008527.9	502	814	7	12	0	-3.64082
ENST00000008527.9:514-814	ENST00000008527.9	514	814	5	7	0	-2.90689
ENST00000008527.9:532-814	ENST00000008527.9	532	814	5	7	0	-2.90689
ENST00000008527.9:548-779	ENST00000008527.9	548	779	4	0	2	2.32193
ENST00000008527.9:555-633	ENST00000008527.9	555	633	0	2	1	-1.58496
ENST00000008527.9:610-814	ENST00000008527.9	610	814	3	4	0	-2.23704
ENST00000008527.9:685-814	ENST00000008527.9	685	814	3	4	0	-2.23704
ENST00000008527.9:7-265	ENST00000008527.9	7	265	1	2	4	-1.58496
ENST00000008527.9:70-265	ENST00000008527.9	70	265	1	2	4	-1.58496
ENST00000008527.9:739-814	ENST00000008527.9	739	814	3	4	0	-2.23704
ENST00000008527.9:750-834	ENST00000008527.9	750	834	0	4	2	-2.32193
ENST00000008527.9:766-814	ENST00000008527.9	766	814	3	2	0	1.926
ENST00000008527.9:775-814	ENST00000008527.9	775	814	3	2	0	1.926
ENST00000008527.9:789-834	ENST00000008527.9	789	834	0	4	2	-2.32193
ENST00000008527.9:801-834	ENST00000008527.9	801	834	0	1	1	-1
ENST00000009041.11:0-198	ENST00000009041.11	0	198	3	0	1	2.16993
ENST00000009041.11:167-245	ENST00000009041.11	167	245	2	1	0	1.58496
ENST00000009041.11:18-198	ENST00000009041.11	18	198	3	0	1	2.16993
ENST00000009041.11:199-214	ENST00000009041.11	199	214	0	2	0	-2.32193
ENST00000009041.11:2-245	ENST00000009041.11	2	245	3	3	0	2
ENST00000009041.11:21-198	ENST00000009041.11	21	198	3	0	1	2.16993
ENST00000009041.11:24-198	ENST00000009041.11	24	198	3	0	1	2.16993
ENST00000009041.11:29-245	ENST00000009041.11	29	245	3	3	0	2
ENST00000009041.11:49-214	ENST00000009041.11	49	214	0	3	3	-2
ENST00000009041.11:52-214	ENST00000009041.11	52	214	0	2	3	-1.926
ENST00000009041.11:56-245	ENST00000009041.11	56	245	2	3	0	-1.926
ENST00000009041.11:65-245	ENST00000009041.11	65	245	2	3	0	-1.926
ENST00000009041.11:70-214	ENST00000009041.11	70	214	0	2	3	-1.926
ENST00000009041.11:77-245	ENST00000009041.11	77	245	2	3	0	-1.926
ENST00000009041.11:84-198	ENST00000009041.11	84	198	3	0	0	2.80735
ENST00000009041.11:89-245	ENST00000009041.11	89	245	2	2	0	1.58496
ENST00000013125.8:102-159	ENST00000013125.8	102	159	0	2	0	-2.32193
ENST00000013125.8:11-266	ENST00000013125.8	11	266	1	6	2	-2.5025
ENST00000013125.8:117-159	ENST00000013125.8	117	159	0	2	0	-2.32193
ENST00000013125.8:14-266	ENST00000013125.8	14	266	1	6	2	-2.5025
ENST00000013125.8:142-166	ENST00000013125.8	142	166	2	0	0	2.32193
ENST00000013125.8:148-166	ENST00000013125.8	148	166	2	0	0	2.32193
ENST00000013125.8:191-266	ENST00000013125.8	191	266	1	6	0	-3.30117
ENST00000013125.8:2-266	ENST00000013125.8	2	266	1	6	2	-2.5025
ENST00000013125.8:38-266	ENST00000013125.8	38	266	1	6	2	-2.5025
ENST00000013125.8:67-166	ENST00000013125.8	67	166	2	0	0	2.32193
ENST00000013125.8:74-266	ENST00000013125.8	74	266	1	6	2	-2.5025
ENST00000013125.8:83-266	ENST00000013125.8	83	266	1	6	2	-2.5025
ENST00000013125.8:87-159	ENST00000013125.8	87	159	0	2	0	-2.32193
ENST00000014914.5:105-195	ENST00000014914.5	105	195	0	1	1	-1
ENST00000014914.5:107-599	ENST00000014914.5	107	599	5	5	4	0.192645
ENST00000014914.5:110-599	ENST00000014914.5	110	599	5	5	4	0.192645
ENST00000014914.5:131-599	ENST00000014914.5	131	599	4	5	3	-0.584963
ENST00000014914.5:176-599	ENST00000014914.5	176	599	4	5	3	-0.584963
ENST00000014914.5:191-599	ENST00000014914.5	191	599	4	5	3	-0.584963
ENST00000014914.5:215-599	ENST00000014914.5	215	599	4	5	2	-1.18442
ENST00000014914.5:227-599	ENST00000014914.5	227	599	4	5	2	-1.18442
ENST00000014914.5:275-599	ENST00000014914.5	275	599	4	5	2	-1.18442
ENST00000014914.5:287-599	ENST00000014914.5	287	599	4	5	2	-1.18442
ENST00000014914.5:296-599	ENST00000014914.5	296	599	4	5	2	-1.18442
ENST00000014914.5:311-599	ENST00000014914.5	311	599	4	5	2	-1.18442
ENST00000014914.5:329-599	ENST00000014914.5	329	599	3	5	2	-1.26303
ENST00000014914.5:335-599	ENST00000014914.5	335	599	3	5	2	-1.26303
ENST00000014914.5:356-599	ENST00000014914.5	356	599	3	5	2	-1.26303
ENST00000014914.5:362-599	ENST00000014914.5	362	599	3	5	2	-1.26303
ENST00000014914.5:398-599	ENST00000014914.5	398	599	3	4	2	-0.736966
ENST00000014914.5:440-599	ENST00000014914.5	440	599	0	4	2	-2.32193
ENST00000014914.5:476-599	ENST00000014914.5	476	599	0	4	2	-2.32193
ENST00000014914.5:488-599	ENST00000014914.5	488	599	0	4	2	-2.32193
ENST00000014914.5:493-511	ENST00000014914.5	493	511	1	0	1	1
ENST00000014914.5:495-582	ENST00000014914.5	495	582	4	1	0	2.63227
ENST00000014914.5:522-582	ENST00000014914.5	522	582	2	0	0	2.32193
ENST00000014914.5:59-599	ENST00000014914.5	59	599	5	5	4	0.192645
ENST00000014914.5:719-806	ENST00000014914.5	719	806	0	3	4	-2.23704
ENST00000014914.5:746-806	ENST00000014914.5	746	806	0	3	4	-2.23704
ENST00000014914.5:752-806	ENST00000014914.5	752	806	0	3	4	-2.23704
ENST00000014914.5:755-806	ENST00000014914.5	755	806	0	3	4	-2.23704
ENST00000014914.5:771-831	ENST00000014914.5	771	831	6	7	1	-2.44057
ENST00000014914.5:780-831	ENST00000014914.5	780	831	4	7	1	-2.45943
ENST00000014914.5:782-806	ENST00000014914.5	782	806	0	0	3	-2.80735
ENST00000014914.5:788-806	ENST00000014914.5	788	806	0	0	3	-2.80735
ENST00000014914.5:792-831	ENST00000014914.5	792	831	4	6	1	-2.15528
ENST00000014914.5:8-599	ENST00000014914.5	8	599	5	6	4	-0.485427
ENST00000014914.5:802-886	ENST00000014914.5	802	886	13	4	87	-6.91496
ENST00000014914.5:810-831	ENST00000014914.5	810	831	4	3	0	2.23704
ENST00000014914.5:814-886	ENST00000014914.5	814	886	12	3	86	-6.95684
ENST00000014914.5:834-870	ENST00000014914.5	834	870	40	6	1	5.8701
ENST00000014914.5:846-870	ENST00000014914.5	846	870	38	6	1	5.77435
ENST00000014914.5:852-870	ENST00000014914.5	852	870	38	6	1	5.77435
ENST00000014914.5:856-886	ENST00000014914.5	856	886	9	3	81	-6.93721
ENST00000014914.5:92-599	ENST00000014914.5	92	599	5	5	4	0.192645
ENST00000014914.5:98-599	ENST00000014914.5	98	599	5	5	4	0.192645
ENST00000019317.8:12-174	ENST00000019317.8	12	174	3	0	0	2.80735
ENST00000019317.8:16-70	ENST00000019317.8	16	70	0	0	3	-2.80735
ENST00000019317.8:21-174	ENST00000019317.8	21	174	3	0	0	2.80735
ENST00000019317.8:32-185	ENST00000019317.8	32	185	0	3	0	-2.80735
ENST00000019317.8:35-185	ENST00000019317.8	35	185	0	3	0	-2.80735
ENST00000025301.3:2-53	ENST00000025301.3	2	53	4	1	0	2.63227
ENST00000025301.3:29-53	ENST00000025301.3	29	53	4	1	0	2.63227
ENST00000025301.3:38-53	ENST00000025301.3	38	53	4	0	0	3.16993
ENST00000025301.3:43-103	ENST00000025301.3	43	103	0	9	0	-4.24793
ENST00000025301.3:49-103	ENST00000025301.3	49	103	0	5	0	-3.45943
ENST00000025301.3:86-116	ENST00000025301.3	86	116	5	0	0	3.45943
ENST00000025301.3:94-103	ENST00000025301.3	94	103	0	4	0	-3.16993
ENST00000025399.10:11-32	ENST00000025399.10	11	32	0	39	0	-6.30378
ENST00000025399.10:5-32	ENST00000025399.10	5	32	0	39	0	-6.30378
ENST00000033079.7:162-255	ENST00000033079.7	162	255	11	0	1	4.2854
ENST00000033079.7:185-338	ENST00000033079.7	185	338	2	57	4	-6.54946
ENST00000033079.7:203-338	ENST00000033079.7	203	338	2	57	4	-6.54946
ENST00000033079.7:228-255	ENST00000033079.7	228	255	2	0	1	1.58496
ENST00000033079.7:247-262	ENST00000033079.7	247	262	1	0	2	-1.58496
ENST00000033079.7:25-106	ENST00000033079.7	25	106	1	3	2	-1
ENST00000033079.7:255-270	ENST00000033079.7	255	270	3	1	0	2.16993
ENST00000033079.7:258-270	ENST00000033079.7	258	270	3	0	0	2.80735
ENST00000033079.7:266-338	ENST00000033079.7	266	338	1	46	3	-6.29572
ENST00000033079.7:277-322	ENST00000033079.7	277	322	0	1	9	-3.96347
ENST00000033079.7:290-338	ENST00000033079.7	290	338	1	39	3	-6.01823
ENST00000033079.7:305-338	ENST00000033079.7	305	338	0	36	3	-5.96312
ENST00000033079.7:36-255	ENST00000033079.7	36	255	15	2	1	4.41504
ENST00000033079.7:6-255	ENST00000033079.7	6	255	15	2	4	3.90689
ENST00000033079.7:83-338	ENST00000033079.7	83	338	2	62	5	-6.64949
ENST00000035307.6:1003-1135	ENST00000035307.6	1003	1135	3	8	0	-3.30875
ENST00000035307.6:1037-1130	ENST00000035307.6	1037	1130	7	0	0	3.90689
ENST00000035307.6:1058-1130	ENST00000035307.6	1058	1130	7	0	0	3.90689
ENST00000035307.6:1076-1130	ENST00000035307.6	1076	1130	7	0	0	3.90689
ENST00000035307.6:1079-1130	ENST00000035307.6	1079	1130	7	0	0	3.90689
ENST00000035307.6:1086-1158	ENST00000035307.6	1086	1158	0	0	7	-3.90689
ENST00000035307.6:1088-1130	ENST00000035307.6	1088	1130	7	0	0	3.90689
ENST00000035307.6:1113-1158	ENST00000035307.6	1113	1158	0	0	5	-3.45943
ENST00000035307.6:1116-1158	ENST00000035307.6	1116	1158	0	0	5	-3.45943
ENST00000035307.6:1123-1135	ENST00000035307.6	1123	1135	0	5	0	-3.45943
ENST00000035307.6:1126-1135	ENST00000035307.6	1126	1135	0	5	0	-3.45943
ENST00000035307.6:12-309	ENST00000035307.6	12	309	20	10	3	3.83519
ENST00000035307.6:1252-1465	ENST00000035307.6	1252	1465	1	2	1	-0.584963
ENST00000035307.6:1276-1465	ENST00000035307.6	1276	1465	1	2	1	-0.584963
ENST00000035307.6:1327-1465	ENST00000035307.6	1327	1465	1	2	0	-1.58496
ENST00000035307.6:1347-1422	ENST00000035307.6	1347	1422	0	1	1	-1
ENST00000035307.6:1353-1422	ENST00000035307.6	1353	1422	0	1	1	-1
ENST00000035307.6:150-309	ENST00000035307.6	150	309	20	10	3	3.83519
ENST00000035307.6:201-309	ENST00000035307.6	201	309	19	10	1	4.10434
ENST00000035307.6:230-410	ENST00000035307.6	230	410	4	42	10	-5.51457
ENST00000035307.6:243-309	ENST00000035307.6	243	309	19	10	1	4.10434
ENST00000035307.6:249-309	ENST00000035307.6	249	309	19	8	1	4.22055
ENST00000035307.6:266-410	ENST00000035307.6	266	410	4	42	7	-5.68729
ENST00000035307.6:269-410	ENST00000035307.6	269	410	3	29	7	-4.96134
ENST00000035307.6:275-410	ENST00000035307.6	275	410	3	29	7	-4.96134
ENST00000035307.6:300-309	ENST00000035307.6	300	309	5	4	0	2.5025
ENST00000035307.6:305-410	ENST00000035307.6	305	410	3	25	0	-5.35504
ENST00000035307.6:311-410	ENST00000035307.6	311	410	3	23	0	-5.21245
ENST00000035307.6:318-435	ENST00000035307.6	318	435	23	0	3	5.21245
ENST00000035307.6:320-410	ENST00000035307.6	320	410	3	23	0	-5.21245
ENST00000035307.6:364-862	ENST00000035307.6	364	862	3	7	27	-4.79757
ENST00000035307.6:374-410	ENST00000035307.6	374	410	2	8	0	-3.51096
ENST00000035307.6:406-862	ENST00000035307.6	406	862	3	5	14	-3.37346
ENST00000035307.6:409-862	ENST00000035307.6	409	862	3	5	14	-3.37346
ENST00000035307.6:431-473	ENST00000035307.6	431	473	0	1	1	-1
ENST00000035307.6:436-862	ENST00000035307.6	436	862	3	5	14	-3.37346
ENST00000035307.6:440-473	ENST00000035307.6	440	473	0	1	1	-1
ENST00000035307.6:481-862	ENST00000035307.6	481	862	2	5	13	-3.41954
ENST00000035307.6:514-862	ENST00000035307.6	514	862	2	4	12	-3.36923
ENST00000035307.6:536-656	ENST00000035307.6	536	656	2	0	2	1.58496
ENST00000035307.6:54-309	ENST00000035307.6	54	309	20	10	3	3.83519
ENST00000035307.6:562-862	ENST00000035307.6	562	862	2	4	12	-3.36923
ENST00000035307.6:578-656	ENST00000035307.6	578	656	1	0	2	-1.58496
ENST00000035307.6:584-656	ENST00000035307.6	584	656	1	0	2	-1.58496
ENST00000035307.6:594-774	ENST00000035307.6	594	774	3	2	1	1
ENST00000035307.6:597-774	ENST00000035307.6	597	774	3	2	1	1
ENST00000035307.6:601-862	ENST00000035307.6	601	862	2	3	12	-3.54916
ENST00000035307.6:603-774	ENST00000035307.6	603	774	3	2	1	1
ENST00000035307.6:625-862	ENST00000035307.6	625	862	0	3	12	-4.05311
ENST00000035307.6:634-862	ENST00000035307.6	634	862	0	3	12	-4.05311
ENST00000035307.6:649-862	ENST00000035307.6	649	862	0	2	12	-4.22607
ENST00000035307.6:699-774	ENST00000035307.6	699	774	3	0	0	2.80735
ENST00000035307.6:702-774	ENST00000035307.6	702	774	3	0	0	2.80735
ENST00000035307.6:717-774	ENST00000035307.6	717	774	3	0	0	2.80735
ENST00000035307.6:734-791	ENST00000035307.6	734	791	0	12	0	-4.64386
ENST00000035307.6:739-862	ENST00000035307.6	739	862	0	2	9	-3.72048
ENST00000035307.6:746-791	ENST00000035307.6	746	791	0	9	0	-4.24793
ENST00000035307.6:761-791	ENST00000035307.6	761	791	0	9	0	-4.24793
ENST00000035307.6:770-791	ENST00000035307.6	770	791	0	9	0	-4.24793
ENST00000035307.6:778-862	ENST00000035307.6	778	862	0	2	9	-3.72048
ENST00000035307.6:784-862	ENST00000035307.6	784	862	0	2	9	-3.72048
ENST00000035307.6:787-862	ENST00000035307.6	787	862	0	2	0	-2.32193
ENST00000035307.6:81-309	ENST00000035307.6	81	309	20	10	3	3.83519
ENST00000035307.6:813-1041	ENST00000035307.6	813	1041	0	3	3	-2
ENST00000035307.6:826-862	ENST00000035307.6	826	862	0	2	0	-2.32193
ENST00000035307.6:887-1130	ENST00000035307.6	887	1130	8	0	3	3.30875
ENST00000035307.6:941-1130	ENST00000035307.6	941	1130	8	0	3	3.30875
ENST00000035307.6:956-1130	ENST00000035307.6	956	1130	8	0	3	3.30875
ENST00000035307.6:99-309	ENST00000035307.6	99	309	20	10	3	3.83519
ENST00000037243.6:42-90	ENST00000037243.6	42	90	6	6	0	2.80735
ENST00000037243.6:48-90	ENST00000037243.6	48	90	4	6	0	-2.72247
ENST00000037243.6:54-90	ENST00000037243.6	54	90	3	5	0	-2.52356
ENST00000037243.6:66-90	ENST00000037243.6	66	90	3	2	0	1.926
ENST00000037243.6:69-90	ENST00000037243.6	69	90	3	2	0	1.926
ENST00000037243.6:72-90	ENST00000037243.6	72	90	2	2	0	1.58496
ENST00000037243.6:81-90	ENST00000037243.6	81	90	2	2	0	1.58496
ENST00000046640.7:285-501	ENST00000046640.7	285	501	3	14	5	-3.37346
ENST00000046640.7:309-501	ENST00000046640.7	309	501	3	14	5	-3.37346
ENST00000046640.7:321-501	ENST00000046640.7	321	501	3	14	4	-3.5325
ENST00000046640.7:330-501	ENST00000046640.7	330	501	3	12	4	-3.11839
ENST00000046640.7:350-383	ENST00000046640.7	350	383	0	1	3	-2.16993
ENST00000046640.7:365-383	ENST00000046640.7	365	383	0	1	3	-2.16993
ENST00000046640.7:370-520	ENST00000046640.7	370	520	11	4	3	2.87447
ENST00000046640.7:376-520	ENST00000046640.7	376	520	8	4	3	1.926
ENST00000046640.7:379-520	ENST00000046640.7	379	520	8	4	2	2.32193
ENST00000046640.7:391-520	ENST00000046640.7	391	520	8	3	2	2.52838
ENST00000046640.7:406-520	ENST00000046640.7	406	520	4	2	1	1.58496
ENST00000046640.7:409-520	ENST00000046640.7	409	520	4	2	1	1.58496
ENST00000046640.7:411-501	ENST00000046640.7	411	501	1	3	2	-1
ENST00000046640.7:418-520	ENST00000046640.7	418	520	4	2	1	1.58496
ENST00000046640.7:436-520	ENST00000046640.7	436	520	3	1	0	2.16993
ENST00000046640.7:445-520	ENST00000046640.7	445	520	3	1	0	2.16993
ENST00000046640.7:478-520	ENST00000046640.7	478	520	3	1	0	2.16993
ENST00000052569.10:101-134	ENST00000052569.10	101	134	4	45	2	-6.13533
ENST00000052569.10:110-134	ENST00000052569.10	110	134	1	9	0	-3.96347
ENST00000052569.10:15-93	ENST00000052569.10	15	93	2	15	2	-4.23185
ENST00000052569.10:21-93	ENST00000052569.10	21	93	2	15	2	-4.23185
ENST00000052569.10:25-124	ENST00000052569.10	25	124	17	5	46	-5.32933
ENST00000052569.10:36-93	ENST00000052569.10	36	93	0	14	2	-4.49185
ENST00000052569.10:38-134	ENST00000052569.10	38	134	6	46	16	-5.29408
ENST00000052569.10:50-134	ENST00000052569.10	50	134	6	46	16	-5.29408
ENST00000052569.10:79-124	ENST00000052569.10	79	124	16	5	46	-5.36906
ENST00000052569.10:8-29	ENST00000052569.10	8	29	0	2	1	-1.58496
ENST00000052569.10:87-93	ENST00000052569.10	87	93	0	14	2	-4.49185
ENST00000052569.10:89-134	ENST00000052569.10	89	134	6	46	2	-6.0613
ENST00000052569.10:93-111	ENST00000052569.10	93	111	46	2	3	6.23334
ENST00000052569.10:95-134	ENST00000052569.10	95	134	4	46	2	-6.17454
ENST00000052569.10:98-134	ENST00000052569.10	98	134	4	46	2	-6.17454
ENST00000053867.7:112-172	ENST00000053867.7	112	172	1	0	1	1
ENST00000053867.7:126-198	ENST00000053867.7	126	198	2	1	0	1.58496
ENST00000054666.10:1-76	ENST00000054666.10	1	76	4	0	0	3.16993
ENST00000054666.10:10-76	ENST00000054666.10	10	76	4	0	0	3.16993
ENST00000054666.10:4-76	ENST00000054666.10	4	76	4	0	0	3.16993
ENST00000064778.8:4-196	ENST00000064778.8	4	196	2	1	0	1.58496
ENST00000064778.8:97-196	ENST00000064778.8	97	196	2	1	0	1.58496
ENST00000066544.7:16-85	ENST00000066544.7	16	85	0	2	0	-2.32193
ENST00000072869.8:16-139	ENST00000072869.8	16	139	3	3	0	2
ENST00000072869.8:31-139	ENST00000072869.8	31	139	3	2	0	1.926
ENST00000072869.8:34-139	ENST00000072869.8	34	139	3	2	0	1.926
ENST00000075120.11:0-126	ENST00000075120.11	0	126	0	1	12	-4.42368
ENST00000075120.11:100-151	ENST00000075120.11	100	151	2	25	0	-5.45578
ENST00000075120.11:111-126	ENST00000075120.11	111	126	0	1	12	-4.42368
ENST00000075120.11:122-227	ENST00000075120.11	122	227	25	3	2	5.12102
ENST00000075120.11:128-227	ENST00000075120.11	128	227	15	3	2	4.06178
ENST00000075120.11:130-151	ENST00000075120.11	130	151	1	13	0	-4.5502
ENST00000075120.11:161-227	ENST00000075120.11	161	227	2	3	1	-1
ENST00000075120.11:170-227	ENST00000075120.11	170	227	2	3	1	-1
ENST00000075120.11:173-227	ENST00000075120.11	173	227	2	3	1	-1
ENST00000075120.11:177-219	ENST00000075120.11	177	219	3	1	0	2.16993
ENST00000075120.11:186-219	ENST00000075120.11	186	219	3	1	0	2.16993
ENST00000075120.11:215-227	ENST00000075120.11	215	227	2	0	0	2.32193
ENST00000075120.11:223-232	ENST00000075120.11	223	232	0	2	0	-2.32193
ENST00000075120.11:24-126	ENST00000075120.11	24	126	0	1	12	-4.42368
ENST00000075120.11:70-151	ENST00000075120.11	70	151	2	25	0	-5.45578
ENST00000085068.7:9-75	ENST00000085068.7	9	75	0	1	10	-4.13303
ENST00000085079.11:100-181	ENST00000085079.11	100	181	2	17	4	-4.19411
ENST00000085079.11:112-181	ENST00000085079.11	112	181	2	17	4	-4.19411
ENST00000085079.11:148-181	ENST00000085079.11	148	181	2	17	2	-4.48727
ENST00000085079.11:157-181	ENST00000085079.11	157	181	2	17	2	-4.48727
ENST00000085079.11:68-152	ENST00000085079.11	68	152	0	3	4	-2.23704
ENST00000085079.11:80-152	ENST00000085079.11	80	152	0	3	0	-2.80735
ENST00000085079.11:88-181	ENST00000085079.11	88	181	2	17	4	-4.19411
ENST00000085079.11:92-152	ENST00000085079.11	92	152	0	2	0	-2.32193
ENST00000161863.8:20-68	ENST00000161863.8	20	68	4	4	0	2.32193
ENST00000161863.8:26-68	ENST00000161863.8	26	68	4	4	0	2.32193
ENST00000161863.8:35-68	ENST00000161863.8	35	68	4	4	0	2.32193
ENST00000162749.6:100-154	ENST00000162749.6	100	154	16	19	9	-2.19878
ENST00000162749.6:114-291	ENST00000162749.6	114	291	37	47	20	-3.55459
ENST00000162749.6:12-291	ENST00000162749.6	12	291	38	50	26	-3.1008
ENST00000162749.6:121-154	ENST00000162749.6	121	154	12	13	7	-1.55459
ENST00000162749.6:137-263	ENST00000162749.6	137	263	14	10	31	-3.8643
ENST00000162749.6:150-291	ENST00000162749.6	150	291	29	37	7	-4.38098
ENST00000162749.6:159-291	ENST00000162749.6	159	291	29	32	7	-4.12443
ENST00000162749.6:198-291	ENST00000162749.6	198	291	26	16	7	3.5923
ENST00000162749.6:203-263	ENST00000162749.6	203	263	2	0	5	-2.6845
ENST00000162749.6:240-291	ENST00000162749.6	240	291	26	11	5	4.14684
ENST00000162749.6:246-291	ENST00000162749.6	246	291	26	11	5	4.14684
ENST00000162749.6:254-263	ENST00000162749.6	254	263	0	0	3	-2.80735
ENST00000162749.6:269-281	ENST00000162749.6	269	281	1	25	2	-5.33985
ENST00000162749.6:31-154	ENST00000162749.6	31	154	16	19	9	-2.19878
ENST00000162749.6:95-104	ENST00000162749.6	95	104	5	1	0	3
ENST00000164305.9:116-230	ENST00000164305.9	116	230	7	3	5	1.37851
ENST00000164305.9:146-230	ENST00000164305.9	146	230	7	3	5	1.37851
ENST00000164305.9:194-230	ENST00000164305.9	194	230	7	2	3	2.16993
ENST00000164305.9:203-230	ENST00000164305.9	203	230	7	2	3	2.16993
ENST00000164305.9:229-274	ENST00000164305.9	229	274	4	10	2	-2.90689
ENST00000166345.7:0-255	ENST00000166345.7	0	255	1	1	7	-3.16993
ENST00000166345.7:118-274	ENST00000166345.7	118	274	1	2	1	-0.584963
ENST00000166345.7:129-255	ENST00000166345.7	129	255	1	1	2	-0.584963
ENST00000166345.7:13-274	ENST00000166345.7	13	274	1	7	1	-3.16993
ENST00000166345.7:141-255	ENST00000166345.7	141	255	1	1	2	-0.584963
ENST00000166345.7:157-274	ENST00000166345.7	157	274	1	2	1	-0.584963
ENST00000166345.7:222-255	ENST00000166345.7	222	255	1	1	2	-0.584963
ENST00000166345.7:225-255	ENST00000166345.7	225	255	1	1	2	-0.584963
ENST00000166345.7:270-306	ENST00000166345.7	270	306	12	2	1	3.98185
ENST00000166345.7:282-306	ENST00000166345.7	282	306	12	2	1	3.98185
ENST00000166345.7:46-274	ENST00000166345.7	46	274	1	7	1	-3.16993
ENST00000166345.7:7-274	ENST00000166345.7	7	274	1	7	1	-3.16993
ENST00000166345.7:91-274	ENST00000166345.7	91	274	1	2	1	-0.584963
ENST00000166345.7:97-274	ENST00000166345.7	97	274	1	2	1	-0.584963
ENST00000175091.4:101-125	ENST00000175091.4	101	125	0	4	0	-3.16993
ENST00000175091.4:131-332	ENST00000175091.4	131	332	0	1	1	-1
ENST00000175091.4:19-238	ENST00000175091.4	19	238	1	0	4	-2.63227
ENST00000175091.4:206-332	ENST00000175091.4	206	332	0	1	1	-1
ENST00000175091.4:228-402	ENST00000175091.4	228	402	3	5	3	-0.788496
ENST00000175091.4:234-402	ENST00000175091.4	234	402	3	5	3	-0.788496
ENST00000175091.4:242-332	ENST00000175091.4	242	332	0	1	1	-1
ENST00000175091.4:301-445	ENST00000175091.4	301	445	8	13	30	-4.0572
ENST00000175091.4:306-402	ENST00000175091.4	306	402	2	4	3	-0.736966
ENST00000175091.4:310-445	ENST00000175091.4	310	445	7	13	30	-4.17632
ENST00000175091.4:324-402	ENST00000175091.4	324	402	2	4	3	-0.736966
ENST00000175091.4:342-402	ENST00000175091.4	342	402	2	4	3	-0.736966
ENST00000175091.4:351-402	ENST00000175091.4	351	402	2	4	3	-0.736966
ENST00000175091.4:36-162	ENST00000175091.4	36	162	4	1	0	2.63227
ENST00000175091.4:370-445	ENST00000175091.4	370	445	7	13	30	-4.17632
ENST00000175091.4:381-402	ENST00000175091.4	381	402	2	3	0	-1.926
ENST00000175091.4:412-445	ENST00000175091.4	412	445	2	4	28	-5.24569
ENST00000175091.4:49-238	ENST00000175091.4	49	238	1	0	4	-2.63227
ENST00000175091.4:61-238	ENST00000175091.4	61	238	1	0	4	-2.63227
ENST00000175091.4:7-238	ENST00000175091.4	7	238	1	0	4	-2.63227
ENST00000175091.4:89-125	ENST00000175091.4	89	125	0	4	1	-2.63227
ENST00000175091.4:9-162	ENST00000175091.4	9	162	4	1	0	2.63227
ENST00000189444.10:121-154	ENST00000189444.10	121	154	0	43	10	-5.86594
ENST00000189444.10:6-138	ENST00000189444.10	6	138	8	1	7	2.67243
ENST00000189444.10:82-103	ENST00000189444.10	82	103	0	4	0	-3.16993
ENST00000190983.4:14-98	ENST00000190983.4	14	98	0	2	2	-1.58496
ENST00000190983.4:2-98	ENST00000190983.4	2	98	0	2	2	-1.58496
ENST00000190983.4:38-98	ENST00000190983.4	38	98	0	2	2	-1.58496
ENST00000190983.4:50-98	ENST00000190983.4	50	98	0	2	2	-1.58496
ENST00000190983.4:56-98	ENST00000190983.4	56	98	0	2	2	-1.58496
ENST00000190983.4:62-98	ENST00000190983.4	62	98	0	2	2	-1.58496
ENST00000190983.4:8-98	ENST00000190983.4	8	98	0	2	2	-1.58496
ENST00000192788.5:3-93	ENST00000192788.5	3	93	3	12	0	-4.05311
ENST00000192788.5:45-93	ENST00000192788.5	45	93	3	11	0	-3.89308
ENST00000192788.5:63-93	ENST00000192788.5	63	93	3	10	0	-3.71741
ENST00000193403.10:141-156	ENST00000193403.10	141	156	0	6	0	-3.70044
ENST00000199320.8:101-128	ENST00000199320.8	101	128	3	0	17	-4.6837
ENST00000199320.8:11-128	ENST00000199320.8	11	128	3	1	20	-4.82018
ENST00000199320.8:29-128	ENST00000199320.8	29	128	3	1	20	-4.82018
ENST00000199320.8:44-128	ENST00000199320.8	44	128	3	1	20	-4.82018
ENST00000199320.8:54-108	ENST00000199320.8	54	108	1	20	1	-5.07973
ENST00000199320.8:57-108	ENST00000199320.8	57	108	1	20	1	-5.07973
ENST00000199320.8:87-108	ENST00000199320.8	87	108	1	18	1	-4.90207
ENST00000199320.8:90-108	ENST00000199320.8	90	108	1	18	1	-4.90207
ENST00000199389.10:12-78	ENST00000199389.10	12	78	2	1	4	-1.58496
ENST00000199389.10:30-78	ENST00000199389.10	30	78	2	1	4	-1.58496
ENST00000199389.10:42-78	ENST00000199389.10	42	78	2	1	4	-1.58496
ENST00000199389.10:45-78	ENST00000199389.10	45	78	2	1	4	-1.58496
ENST00000199389.10:6-78	ENST00000199389.10	6	78	2	1	4	-1.58496
ENST00000200453.5:101-155	ENST00000200453.5	101	155	1	7	9	-2.8314
ENST00000200453.5:108-132	ENST00000200453.5	108	132	1	9	0	-3.96347
ENST00000200453.5:128-155	ENST00000200453.5	128	155	1	6	0	-3.30117
ENST00000200453.5:147-243	ENST00000200453.5	147	243	6	3	0	2.80735
ENST00000200453.5:18-132	ENST00000200453.5	18	132	1	29	1	-5.68876
ENST00000200453.5:27-132	ENST00000200453.5	27	132	1	29	1	-5.68876
ENST00000200453.5:52-112	ENST00000200453.5	52	112	20	1	1	5.07973
ENST00000200453.5:55-112	ENST00000200453.5	55	112	20	1	1	5.07973
ENST00000200453.5:63-132	ENST00000200453.5	63	132	1	29	0	-5.7866
ENST00000200453.5:70-112	ENST00000200453.5	70	112	4	0	1	2.63227
ENST00000200453.5:73-112	ENST00000200453.5	73	112	4	0	1	2.63227
ENST00000200453.5:77-155	ENST00000200453.5	77	155	1	7	13	-3.49643
ENST00000200453.5:93-132	ENST00000200453.5	93	132	1	9	0	-3.96347
ENST00000201031.2:146-212	ENST00000201031.2	146	212	2	0	9	-3.72048
ENST00000201031.2:191-212	ENST00000201031.2	191	212	2	0	0	2.32193
ENST00000201031.2:49-106	ENST00000201031.2	49	106	5	23	2	-4.74416
ENST00000201031.2:73-106	ENST00000201031.2	73	106	5	22	2	-4.64783
ENST00000201031.2:91-106	ENST00000201031.2	91	106	5	22	2	-4.64783
ENST00000201031.2:95-212	ENST00000201031.2	95	212	17	2	10	3.66166
ENST00000202816.5:61-106	ENST00000202816.5	61	106	0	3	0	-2.80735
ENST00000202816.5:85-106	ENST00000202816.5	85	106	0	3	0	-2.80735
ENST00000202834.11:0-63	ENST00000202834.11	0	63	1	2	5	-2.08746
ENST00000202834.11:28-52	ENST00000202834.11	28	52	2	5	1	-2.08746
ENST00000203001.6:111-126	ENST00000203001.6	111	126	3	1	0	2.16993
ENST00000203001.6:99-126	ENST00000203001.6	99	126	5	1	0	3
ENST00000203630.9:109-241	ENST00000203630.9	109	241	3	0	3	2
ENST00000203630.9:111-300	ENST00000203630.9	111	300	3	3	0	2
ENST00000203630.9:114-300	ENST00000203630.9	114	300	3	3	0	2
ENST00000203630.9:119-410	ENST00000203630.9	119	410	0	3	3	-2
ENST00000203630.9:309-555	ENST00000203630.9	309	555	0	0	5	-3.45943
ENST00000203630.9:324-555	ENST00000203630.9	324	555	0	0	5	-3.45943
ENST00000203630.9:428-638	ENST00000203630.9	428	638	5	0	0	3.45943
ENST00000203630.9:449-638	ENST00000203630.9	449	638	5	0	0	3.45943
ENST00000203630.9:67-241	ENST00000203630.9	67	241	3	0	3	2
ENST00000203630.9:92-410	ENST00000203630.9	92	410	0	3	3	-2
ENST00000204517.10:126-288	ENST00000204517.10	126	288	1	5	5	-1.96683
ENST00000204517.10:15-288	ENST00000204517.10	15	288	3	6	5	-1
ENST00000204517.10:18-288	ENST00000204517.10	18	288	3	6	5	-1
ENST00000204517.10:212-257	ENST00000204517.10	212	257	0	0	2	-2.32193
ENST00000204517.10:228-288	ENST00000204517.10	228	288	1	5	4	-1.848
ENST00000204517.10:246-288	ENST00000204517.10	246	288	1	5	4	-1.848
ENST00000204517.10:33-288	ENST00000204517.10	33	288	3	6	5	-1
ENST00000204517.10:45-288	ENST00000204517.10	45	288	3	6	5	-1
ENST00000204517.10:66-288	ENST00000204517.10	66	288	1	6	5	-2.16993
ENST00000206451.10:23-89	ENST00000206451.10	23	89	2	10	1	-3.61244
ENST00000206451.10:59-89	ENST00000206451.10	59	89	1	10	1	-3.85798
ENST00000209728.8:371-413	ENST00000209728.8	371	413	3	9	8	-2.03562
ENST00000209728.8:386-413	ENST00000209728.8	386	413	3	9	8	-2.03562
ENST00000209728.8:400-457	ENST00000209728.8	400	457	14	26	24	-2.2854
ENST00000209728.8:407-413	ENST00000209728.8	407	413	0	4	1	-2.63227
ENST00000209728.8:409-457	ENST00000209728.8	409	457	9	24	17	-2.95606
ENST00000209728.8:427-457	ENST00000209728.8	427	457	8	24	17	-3.15016
ENST00000209873.8:47-83	ENST00000209873.8	47	83	0	4	3	-2.23704
ENST00000209875.8:0-75	ENST00000209875.8	0	75	93	15	163	-6.93496
ENST00000209875.8:28-70	ENST00000209875.8	28	70	15	159	15	-7.78417
ENST00000209875.8:30-75	ENST00000209875.8	30	75	93	15	163	-6.93496
ENST00000209875.8:33-75	ENST00000209875.8	33	75	93	15	163	-6.93496
ENST00000209875.8:63-75	ENST00000209875.8	63	75	85	0	63	6.32022
ENST00000210060.11:34-70	ENST00000210060.11	34	70	0	0	3	-2.80735
ENST00000210060.11:36-102	ENST00000210060.11	36	102	4	0	0	3.16993
ENST00000210060.11:42-102	ENST00000210060.11	42	102	4	0	0	3.16993
ENST00000211314.4:100-121	ENST00000211314.4	100	121	20	2	3	4.67582
ENST00000211314.4:112-121	ENST00000211314.4	112	121	20	2	2	4.80735
ENST00000211314.4:16-121	ENST00000211314.4	16	121	21	8	12	2.90454
ENST00000211314.4:76-121	ENST00000211314.4	76	121	20	3	3	4.53797
ENST00000215115.4:11-455	ENST00000215115.4	11	455	2	1	0	1.58496
ENST00000215115.4:146-455	ENST00000215115.4	146	455	2	1	0	1.58496
ENST00000215115.4:158-455	ENST00000215115.4	158	455	2	1	0	1.58496
ENST00000215115.4:17-455	ENST00000215115.4	17	455	2	1	0	1.58496
ENST00000215115.4:191-455	ENST00000215115.4	191	455	2	1	0	1.58496
ENST00000215115.4:194-455	ENST00000215115.4	194	455	2	1	0	1.58496
ENST00000215115.4:20-455	ENST00000215115.4	20	455	2	1	0	1.58496
ENST00000215115.4:215-455	ENST00000215115.4	215	455	2	1	0	1.58496
ENST00000215115.4:221-455	ENST00000215115.4	221	455	2	1	0	1.58496
ENST00000215115.4:224-455	ENST00000215115.4	224	455	2	1	0	1.58496
ENST00000215115.4:23-455	ENST00000215115.4	23	455	2	1	0	1.58496
ENST00000215115.4:244-424	ENST00000215115.4	244	424	0	2	1	-1.58496
ENST00000215115.4:265-424	ENST00000215115.4	265	424	0	2	1	-1.58496
ENST00000215115.4:281-455	ENST00000215115.4	281	455	2	1	0	1.58496
ENST00000215115.4:56-455	ENST00000215115.4	56	455	2	1	0	1.58496
ENST00000215115.4:62-455	ENST00000215115.4	62	455	2	1	0	1.58496
ENST00000215115.4:68-455	ENST00000215115.4	68	455	2	1	0	1.58496
ENST00000215115.4:74-455	ENST00000215115.4	74	455	2	1	0	1.58496
ENST00000215570.7:0-60	ENST00000215570.7	0	60	28	13	1	4.7625
ENST00000215570.7:137-158	ENST00000215570.7	137	158	3	6	0	-2.80735
ENST00000215570.7:27-60	ENST00000215570.7	27	60	28	12	1	4.8061
ENST00000215570.7:278-314	ENST00000215570.7	278	314	1	6	1	-2.85798
ENST00000215570.7:32-80	ENST00000215570.7	32	80	1	28	12	-4.8061
ENST00000215570.7:45-60	ENST00000215570.7	45	60	5	10	0	-3.45943
ENST00000215570.7:6-60	ENST00000215570.7	6	60	28	13	1	4.7625
ENST00000215582.7:10-49	ENST00000215582.7	10	49	1	22	21	-4.33173
ENST00000215582.7:24-84	ENST00000215582.7	24	84	24	1	17	4.38247
ENST00000215631.8:103-136	ENST00000215631.8	103	136	2	21	5	-4.54579
ENST00000215631.8:123-225	ENST00000215631.8	123	225	12	17	32	-3.54297
ENST00000215631.8:138-225	ENST00000215631.8	138	225	8	17	15	-2.12102
ENST00000215631.8:192-225	ENST00000215631.8	192	225	4	14	10	-2.6845
ENST00000215631.8:25-136	ENST00000215631.8	25	136	2	23	8	-4.47721
ENST00000215631.8:42-225	ENST00000215631.8	42	225	16	19	38	-3.6666
ENST00000215754.7:107-299	ENST00000215754.7	107	299	2	0	2	1.58496
ENST00000215754.7:131-299	ENST00000215754.7	131	299	2	0	0	2.32193
ENST00000215754.7:242-299	ENST00000215754.7	242	299	2	0	0	2.32193
ENST00000215754.7:380-407	ENST00000215754.7	380	407	9	68	2	-6.65568
ENST00000215754.7:383-407	ENST00000215754.7	383	407	5	67	2	-6.78348
ENST00000215754.7:401-407	ENST00000215754.7	401	407	4	65	2	-6.77302
ENST00000215793.12:59-101	ENST00000215793.12	59	101	2	0	1	1.58496
ENST00000215793.12:75-144	ENST00000215793.12	75	144	29	5	8	4.66838
ENST00000215793.12:92-101	ENST00000215793.12	92	101	2	0	0	2.32193
ENST00000215794.7:122-323	ENST00000215794.7	122	323	2	10	23	-4.34036
ENST00000215794.7:125-323	ENST00000215794.7	125	323	2	10	23	-4.34036
ENST00000215794.7:177-351	ENST00000215794.7	177	351	9	24	2	-4.50189
ENST00000215794.7:184-424	ENST00000215794.7	184	424	25	3	9	4.45766
ENST00000215794.7:191-323	ENST00000215794.7	191	323	2	7	22	-4.45731
ENST00000215794.7:200-323	ENST00000215794.7	200	323	2	7	22	-4.45731
ENST00000215794.7:205-424	ENST00000215794.7	205	424	24	3	7	4.51987
ENST00000215794.7:278-323	ENST00000215794.7	278	323	2	6	22	-4.54844
ENST00000215794.7:280-424	ENST00000215794.7	280	424	24	3	6	4.61203
ENST00000215794.7:300-351	ENST00000215794.7	300	351	3	23	1	-5.08274
ENST00000215794.7:304-424	ENST00000215794.7	304	424	24	2	3	5.04138
ENST00000215794.7:308-323	ENST00000215794.7	308	323	1	3	22	-5
ENST00000215794.7:312-351	ENST00000215794.7	312	351	2	23	1	-5.19438
ENST00000215794.7:319-424	ENST00000215794.7	319	424	4	1	0	2.63227
ENST00000215794.7:334-424	ENST00000215794.7	334	424	2	1	0	1.58496
ENST00000215794.7:358-424	ENST00000215794.7	358	424	1	1	0	1
ENST00000215794.7:364-424	ENST00000215794.7	364	424	1	1	0	1
ENST00000215794.7:372-384	ENST00000215794.7	372	384	0	1	1	-1
ENST00000215794.7:375-384	ENST00000215794.7	375	384	0	1	1	-1
ENST00000215794.7:51-351	ENST00000215794.7	51	351	10	25	2	-4.53033
ENST00000215794.7:59-323	ENST00000215794.7	59	323	2	10	23	-4.34036
ENST00000215794.7:6-351	ENST00000215794.7	6	351	10	25	3	-4.3887
ENST00000215794.7:68-323	ENST00000215794.7	68	323	2	10	23	-4.34036
ENST00000215794.7:81-351	ENST00000215794.7	81	351	10	24	2	-4.43741
ENST00000215829.7:155-506	ENST00000215829.7	155	506	5	2	5	1.32193
ENST00000215829.7:245-506	ENST00000215829.7	245	506	5	2	5	1.32193
ENST00000215829.7:257-506	ENST00000215829.7	257	506	5	2	5	1.32193
ENST00000215829.7:270-489	ENST00000215829.7	270	489	2	2	1	0.485427
ENST00000215829.7:278-506	ENST00000215829.7	278	506	5	2	5	1.32193
ENST00000215829.7:297-489	ENST00000215829.7	297	489	2	2	1	0.485427
ENST00000215829.7:338-506	ENST00000215829.7	338	506	5	2	5	1.32193
ENST00000215829.7:387-489	ENST00000215829.7	387	489	2	2	1	0.485427
ENST00000215829.7:422-506	ENST00000215829.7	422	506	5	2	5	1.32193
ENST00000215829.7:446-506	ENST00000215829.7	446	506	5	1	5	1.96683
ENST00000215829.7:460-559	ENST00000215829.7	460	559	4	32	38	-4.79195
ENST00000215829.7:470-506	ENST00000215829.7	470	506	4	1	3	1.45943
ENST00000215829.7:478-559	ENST00000215829.7	478	559	4	32	37	-4.75489
ENST00000215829.7:482-506	ENST00000215829.7	482	506	4	0	3	2.23704
ENST00000215829.7:502-559	ENST00000215829.7	502	559	4	30	37	-4.7306
ENST00000215829.7:509-524	ENST00000215829.7	509	524	28	37	0	-5.14442
ENST00000216014.8:10-52	ENST00000216014.8	10	52	1	12	0	-4.42368
ENST00000216014.8:14-80	ENST00000216014.8	14	80	12	0	1	4.42368
ENST00000216014.8:32-80	ENST00000216014.8	32	80	12	0	1	4.42368
ENST00000216014.8:46-52	ENST00000216014.8	46	52	1	12	0	-4.42368
ENST00000216014.8:48-132	ENST00000216014.8	48	132	0	0	3	-2.80735
ENST00000216014.8:95-161	ENST00000216014.8	95	161	3	0	0	2.80735
ENST00000216039.9:123-186	ENST00000216039.9	123	186	0	4	0	-3.16993
ENST00000216039.9:131-206	ENST00000216039.9	131	206	3	1	4	-1.45943
ENST00000216039.9:165-186	ENST00000216039.9	165	186	0	4	0	-3.16993
ENST00000216039.9:169-286	ENST00000216039.9	169	286	5	7	2	-1.89308
ENST00000216039.9:197-206	ENST00000216039.9	197	206	3	1	0	2.16993
ENST00000216039.9:226-286	ENST00000216039.9	226	286	1	3	1	-1.37851
ENST00000216039.9:241-286	ENST00000216039.9	241	286	0	1	1	-1
ENST00000216039.9:249-441	ENST00000216039.9	249	441	4	0	1	2.63227
ENST00000216039.9:263-314	ENST00000216039.9	263	314	1	1	0	1
ENST00000216039.9:282-441	ENST00000216039.9	282	441	3	0	0	2.80735
ENST00000216039.9:292-427	ENST00000216039.9	292	427	0	0	3	-2.80735
ENST00000216039.9:31-286	ENST00000216039.9	31	286	5	12	3	-2.94486
ENST00000216039.9:310-427	ENST00000216039.9	310	427	0	0	3	-2.80735
ENST00000216039.9:317-458	ENST00000216039.9	317	458	0	5	0	-3.45943
ENST00000216039.9:97-286	ENST00000216039.9	97	286	5	12	2	-3.21968
ENST00000216085.11:112-178	ENST00000216085.11	112	178	0	2	5	-2.6845
ENST00000216085.11:122-170	ENST00000216085.11	122	170	1	5	0	-3
ENST00000216085.11:124-178	ENST00000216085.11	124	178	0	2	5	-2.6845
ENST00000216085.11:133-178	ENST00000216085.11	133	178	0	2	4	-2.32193
ENST00000216085.11:52-178	ENST00000216085.11	52	178	0	3	6	-2.80735
ENST00000216085.11:55-178	ENST00000216085.11	55	178	0	2	6	-3
ENST00000216085.11:80-170	ENST00000216085.11	80	170	1	6	0	-3.30117
ENST00000216085.11:84-285	ENST00000216085.11	84	285	6	1	3	2.26303
ENST00000216181.9:102-225	ENST00000216181.9	102	225	11	8	10	0.568284
ENST00000216181.9:105-225	ENST00000216181.9	105	225	11	7	10	0.947533
ENST00000216181.9:33-225	ENST00000216181.9	33	225	14	9	12	1.06054
ENST00000216181.9:42-225	ENST00000216181.9	42	225	14	8	12	1.40439
ENST00000216181.9:68-101	ENST00000216181.9	68	101	2	3	0	-1.926
ENST00000216185.6:202-370	ENST00000216185.6	202	370	1	2	0	-1.58496
ENST00000216185.6:220-370	ENST00000216185.6	220	370	1	2	0	-1.58496
ENST00000216185.6:264-435	ENST00000216185.6	264	435	0	1	2	-1.58496
ENST00000216185.6:276-435	ENST00000216185.6	276	435	0	1	2	-1.58496
ENST00000216185.6:295-370	ENST00000216185.6	295	370	1	2	0	-1.58496
ENST00000216185.6:328-370	ENST00000216185.6	328	370	1	2	0	-1.58496
ENST00000216185.6:35-194	ENST00000216185.6	35	194	0	2	0	-2.32193
ENST00000216185.6:354-435	ENST00000216185.6	354	435	0	1	2	-1.58496
ENST00000216185.6:44-194	ENST00000216185.6	44	194	0	2	0	-2.32193
ENST00000216185.6:71-194	ENST00000216185.6	71	194	0	2	0	-2.32193
ENST00000216187.10:59-71	ENST00000216187.10	59	71	0	4	0	-3.16993
ENST00000216190.12:176-305	ENST00000216190.12	176	305	3	2	0	1.926
ENST00000216190.12:263-305	ENST00000216190.12	263	305	3	2	0	1.926
ENST00000216218.7:379-451	ENST00000216218.7	379	451	3	1	3	1.09954
ENST00000216218.7:403-451	ENST00000216218.7	403	451	2	1	3	-1
ENST00000216237.9:100-136	ENST00000216237.9	100	136	0	10	2	-3.90689
ENST00000216237.9:115-136	ENST00000216237.9	115	136	0	10	2	-3.90689
ENST00000216237.9:17-152	ENST00000216237.9	17	152	10	2	0	3.90689
ENST00000216237.9:2-152	ENST00000216237.9	2	152	10	2	0	3.90689
ENST00000216237.9:47-152	ENST00000216237.9	47	152	10	2	0	3.90689
ENST00000216237.9:82-136	ENST00000216237.9	82	136	0	10	2	-3.90689
ENST00000216252.3:10-67	ENST00000216252.3	10	67	0	1	1	-1
ENST00000216252.3:28-67	ENST00000216252.3	28	67	0	1	1	-1
ENST00000216268.5:151-391	ENST00000216268.5	151	391	2	3	0	-1.926
ENST00000216268.5:166-391	ENST00000216268.5	166	391	2	3	0	-1.926
ENST00000216268.5:181-391	ENST00000216268.5	181	391	2	3	0	-1.926
ENST00000216268.5:196-391	ENST00000216268.5	196	391	1	3	0	-2.16993
ENST00000216268.5:252-285	ENST00000216268.5	252	285	0	1	1	-1
ENST00000216268.5:271-391	ENST00000216268.5	271	391	1	2	0	-1.58496
ENST00000216268.5:281-305	ENST00000216268.5	281	305	2	0	1	1.58496
ENST00000216268.5:77-152	ENST00000216268.5	77	152	1	2	2	-0.485427
ENST00000216268.5:81-252	ENST00000216268.5	81	252	2	3	2	-0.36257
ENST00000216277.12:102-195	ENST00000216277.12	102	195	9	7	2	2.41504
ENST00000216277.12:114-195	ENST00000216277.12	114	195	9	6	1	2.83289
ENST00000216277.12:153-195	ENST00000216277.12	153	195	6	6	0	2.80735
ENST00000216277.12:39-75	ENST00000216277.12	39	75	1	28	0	-5.73354
ENST00000216281.12:0-201	ENST00000216281.12	0	201	4	1	0	2.63227
ENST00000216281.12:18-201	ENST00000216281.12	18	201	4	1	0	2.63227
ENST00000216281.12:81-201	ENST00000216281.12	81	201	4	1	0	2.63227
ENST00000216297.6:145-226	ENST00000216297.6	145	226	0	4	0	-3.16993
ENST00000216297.6:188-287	ENST00000216297.6	188	287	2	0	0	2.32193
ENST00000216297.6:191-287	ENST00000216297.6	191	287	2	0	0	2.32193
ENST00000216297.6:253-304	ENST00000216297.6	253	304	5	2	1	2.08746
ENST00000216297.6:283-304	ENST00000216297.6	283	304	5	1	1	2.47805
ENST00000216297.6:89-287	ENST00000216297.6	89	287	5	0	0	3.45943
ENST00000216297.6:92-287	ENST00000216297.6	92	287	5	0	0	3.45943
ENST00000216455.8:17-59	ENST00000216455.8	17	59	3	5	6	-1
ENST00000216479.7:113-152	ENST00000216479.7	113	152	41	200	28	-7.68361
ENST00000216479.7:119-152	ENST00000216479.7	119	152	37	185	18	-7.71407
ENST00000216479.7:134-152	ENST00000216479.7	134	152	37	134	16	-7.00151
ENST00000216479.7:137-152	ENST00000216479.7	137	152	37	134	9	-7.17426
ENST00000216479.7:21-99	ENST00000216479.7	21	99	1	2	0	-1.58496
ENST00000216479.7:45-99	ENST00000216479.7	45	99	1	2	0	-1.58496
ENST00000216479.7:49-109	ENST00000216479.7	49	109	9	1	3	3.16993
ENST00000216479.7:89-152	ENST00000216479.7	89	152	42	203	36	-7.58963
ENST00000216639.7:44-143	ENST00000216639.7	44	143	2	0	1	1.58496
ENST00000216639.7:71-143	ENST00000216639.7	71	143	2	0	1	1.58496
ENST00000216774.10:111-186	ENST00000216774.10	111	186	5	12	1	-3.5025
ENST00000216774.10:122-341	ENST00000216774.10	122	341	1	5	0	-3
ENST00000216774.10:134-341	ENST00000216774.10	134	341	1	5	0	-3
ENST00000216774.10:16-85	ENST00000216774.10	16	85	4	0	1	2.63227
ENST00000216774.10:24-186	ENST00000216774.10	24	186	6	17	1	-4.14975
ENST00000216774.10:71-341	ENST00000216774.10	71	341	1	6	14	-3.7318
ENST00000216774.10:78-186	ENST00000216774.10	78	186	6	14	1	-3.7318
ENST00000216774.10:81-186	ENST00000216774.10	81	186	6	14	1	-3.7318
ENST00000216774.10:84-186	ENST00000216774.10	84	186	5	13	1	-3.67688
ENST00000216774.10:95-341	ENST00000216774.10	95	341	1	5	12	-3.5025
ENST00000217159.5:0-174	ENST00000217159.5	0	174	3	3	5	-0.788496
ENST00000217159.5:100-151	ENST00000217159.5	100	151	1	0	1	1
ENST00000217159.5:106-151	ENST00000217159.5	106	151	1	0	1	1
ENST00000217159.5:24-174	ENST00000217159.5	24	174	3	3	5	-0.788496
ENST00000217159.5:28-151	ENST00000217159.5	28	151	3	3	1	1.09954
ENST00000217159.5:40-151	ENST00000217159.5	40	151	2	1	1	0.584963
ENST00000217159.5:63-174	ENST00000217159.5	63	174	2	1	2	0.485427
ENST00000217182.4:139-244	ENST00000217182.4	139	244	1	32	3	-5.67713
ENST00000217182.4:144-207	ENST00000217182.4	144	207	0	0	14	-4.85798
ENST00000217182.4:147-207	ENST00000217182.4	147	207	0	0	12	-4.64386
ENST00000217182.4:159-207	ENST00000217182.4	159	207	0	0	9	-4.24793
ENST00000217182.4:164-185	ENST00000217182.4	164	185	3	0	0	2.80735
ENST00000217182.4:185-284	ENST00000217182.4	185	284	18	23	1	-4.32193
ENST00000217182.4:236-284	ENST00000217182.4	236	284	9	22	1	-4.46352
ENST00000217182.4:263-284	ENST00000217182.4	263	284	0	6	0	-3.70044
ENST00000217182.4:50-185	ENST00000217182.4	50	185	23	2	0	5.32048
ENST00000217182.4:86-185	ENST00000217182.4	86	185	23	2	0	5.32048
ENST00000217233.7:121-268	ENST00000217233.7	121	268	0	5	6	-2.73039
ENST00000217233.7:145-268	ENST00000217233.7	145	268	0	4	6	-2.72247
ENST00000217233.7:179-422	ENST00000217233.7	179	422	4	6	2	-1.58496
ENST00000217233.7:188-422	ENST00000217233.7	188	422	4	6	2	-1.58496
ENST00000217233.7:223-268	ENST00000217233.7	223	268	0	4	4	-2.32193
ENST00000217233.7:226-268	ENST00000217233.7	226	268	0	4	4	-2.32193
ENST00000217244.7:103-316	ENST00000217244.7	103	316	20	5	15	3.2854
ENST00000217244.7:132-192	ENST00000217244.7	132	192	1	1	3	-1.37851
ENST00000217244.7:172-316	ENST00000217244.7	172	316	20	4	15	3.49923
ENST00000217244.7:185-248	ENST00000217244.7	185	248	2	15	20	-3.90689
ENST00000217244.7:195-216	ENST00000217244.7	195	216	14	19	1	-4.02106
ENST00000217244.7:202-316	ENST00000217244.7	202	316	10	2	1	3.61244
ENST00000217244.7:27-192	ENST00000217244.7	27	192	1	1	3	-1.37851
ENST00000217244.7:40-316	ENST00000217244.7	40	316	20	5	15	3.2854
ENST00000217244.7:67-316	ENST00000217244.7	67	316	20	5	15	3.2854
ENST00000217244.7:69-192	ENST00000217244.7	69	192	1	1	3	-1.37851
ENST00000217244.7:99-192	ENST00000217244.7	99	192	1	1	3	-1.37851
ENST00000217289.8:189-303	ENST00000217289.8	189	303	1	7	0	-3.55459
ENST00000217289.8:192-303	ENST00000217289.8	192	303	1	7	0	-3.55459
ENST00000217289.8:198-303	ENST00000217289.8	198	303	1	7	0	-3.55459
ENST00000217289.8:274-442	ENST00000217289.8	274	442	7	0	4	2.94996
ENST00000217289.8:299-332	ENST00000217289.8	299	332	0	4	0	-3.16993
ENST00000217455.8:65-86	ENST00000217455.8	65	86	3	1	2	1
ENST00000217455.8:74-86	ENST00000217455.8	74	86	3	1	2	1
ENST00000217652.7:149-371	ENST00000217652.7	149	371	3	95	21	-6.91726
ENST00000217652.7:155-371	ENST00000217652.7	155	371	3	95	21	-6.91726
ENST00000217652.7:167-371	ENST00000217652.7	167	371	3	95	21	-6.91726
ENST00000217652.7:199-328	ENST00000217652.7	199	328	2	1	1	0.584963
ENST00000217652.7:212-371	ENST00000217652.7	212	371	3	95	21	-6.91726
ENST00000217652.7:229-328	ENST00000217652.7	229	328	2	1	1	0.584963
ENST00000217652.7:245-371	ENST00000217652.7	245	371	3	95	21	-6.91726
ENST00000217652.7:266-371	ENST00000217652.7	266	371	3	95	21	-6.91726
ENST00000217652.7:289-328	ENST00000217652.7	289	328	2	1	0	1.58496
ENST00000217652.7:324-387	ENST00000217652.7	324	387	94	32	27	5.79773
ENST00000217652.7:353-371	ENST00000217652.7	353	371	2	94	19	-6.97758
ENST00000217893.9:116-278	ENST00000217893.9	116	278	10	83	112	-6.35489
ENST00000217893.9:152-278	ENST00000217893.9	152	278	10	83	112	-6.35489
ENST00000217893.9:155-278	ENST00000217893.9	155	278	10	83	112	-6.35489
ENST00000217893.9:170-278	ENST00000217893.9	170	278	10	74	112	-6.36364
ENST00000217893.9:236-278	ENST00000217893.9	236	278	9	41	111	-6.6783
ENST00000217893.9:249-264	ENST00000217893.9	249	264	26	111	4	-7.09669
ENST00000217893.9:251-278	ENST00000217893.9	251	278	9	41	111	-6.6783
ENST00000217893.9:255-264	ENST00000217893.9	255	264	26	111	4	-7.09669
ENST00000217893.9:4-250	ENST00000217893.9	4	250	1	1	44	-6.3468
ENST00000217893.9:52-250	ENST00000217893.9	52	250	1	1	44	-6.3468
ENST00000217964.11:101-632	ENST00000217964.11	101	632	26	7	4	4.58983
ENST00000217964.11:119-632	ENST00000217964.11	119	632	26	7	4	4.58983
ENST00000217964.11:168-450	ENST00000217964.11	168	450	6	4	26	-4.68182
ENST00000217964.11:23-632	ENST00000217964.11	23	632	26	7	4	4.58983
ENST00000217964.11:314-632	ENST00000217964.11	314	632	20	5	4	4.1392
ENST00000217964.11:349-544	ENST00000217964.11	349	544	4	20	5	-4.1392
ENST00000217964.11:35-632	ENST00000217964.11	35	632	26	7	4	4.58983
ENST00000217964.11:367-544	ENST00000217964.11	367	544	4	18	5	-3.8635
ENST00000217964.11:374-632	ENST00000217964.11	374	632	18	4	4	4.00692
ENST00000217964.11:39-450	ENST00000217964.11	39	450	7	4	26	-4.58983
ENST00000217964.11:421-544	ENST00000217964.11	421	544	4	7	2	-1.97199
ENST00000217964.11:426-450	ENST00000217964.11	426	450	2	4	7	-1.97199
ENST00000217964.11:435-450	ENST00000217964.11	435	450	1	4	5	-1.848
ENST00000217964.11:69-450	ENST00000217964.11	69	450	7	4	26	-4.58983
ENST00000217964.11:79-544	ENST00000217964.11	79	544	4	26	7	-4.58983
ENST00000217964.11:85-544	ENST00000217964.11	85	544	4	26	7	-4.58983
ENST00000217971.7:6-84	ENST00000217971.7	6	84	1	4	56	-6.57085
ENST00000218056.9:123-159	ENST00000218056.9	123	159	1	1	1	0
ENST00000218056.9:143-221	ENST00000218056.9	143	221	0	10	1	-4.13303
ENST00000218056.9:149-221	ENST00000218056.9	149	221	0	10	1	-4.13303
ENST00000218056.9:155-221	ENST00000218056.9	155	221	0	9	1	-3.96347
ENST00000218056.9:189-273	ENST00000218056.9	189	273	9	5	0	3.28011
ENST00000218056.9:193-421	ENST00000218056.9	193	421	9	15	10	-1.4975
ENST00000218056.9:200-221	ENST00000218056.9	200	221	0	9	1	-3.96347
ENST00000218056.9:214-421	ENST00000218056.9	214	421	9	15	2	-3.42884
ENST00000218056.9:23-38	ENST00000218056.9	23	38	7	2	2	2.47131
ENST00000218056.9:235-421	ENST00000218056.9	235	421	8	15	1	-3.72792
ENST00000218056.9:247-421	ENST00000218056.9	247	421	8	15	1	-3.72792
ENST00000218056.9:27-159	ENST00000218056.9	27	159	3	3	9	-2.53605
ENST00000218056.9:277-421	ENST00000218056.9	277	421	4	15	1	-4.1127
ENST00000218056.9:295-421	ENST00000218056.9	295	421	4	15	1	-4.1127
ENST00000218056.9:319-421	ENST00000218056.9	319	421	4	15	1	-4.1127
ENST00000218056.9:322-421	ENST00000218056.9	322	421	4	15	1	-4.1127
ENST00000218056.9:328-421	ENST00000218056.9	328	421	4	13	1	-3.80735
ENST00000218056.9:34-421	ENST00000218056.9	34	421	10	22	11	-2.8452
ENST00000218056.9:352-421	ENST00000218056.9	352	421	4	13	1	-3.80735
ENST00000218056.9:379-421	ENST00000218056.9	379	421	1	5	0	-3
ENST00000218056.9:385-421	ENST00000218056.9	385	421	1	4	0	-2.63227
ENST00000218056.9:4-421	ENST00000218056.9	4	421	12	24	13	-2.6845
ENST00000218056.9:71-221	ENST00000218056.9	71	221	2	10	2	-3.34239
ENST00000218104.5:120-297	ENST00000218104.5	120	297	7	22	6	-3.88474
ENST00000218104.5:141-297	ENST00000218104.5	141	297	7	19	6	-3.43463
ENST00000218104.5:17-212	ENST00000218104.5	17	212	5	16	25	-3.81629
ENST00000218104.5:177-297	ENST00000218104.5	177	297	3	8	3	-2.19265
ENST00000218104.5:198-297	ENST00000218104.5	198	297	1	8	3	-2.90689
ENST00000218104.5:21-297	ENST00000218104.5	21	297	17	33	7	-4.2559
ENST00000218104.5:27-297	ENST00000218104.5	27	297	17	33	7	-4.2559
ENST00000218104.5:30-297	ENST00000218104.5	30	297	17	33	7	-4.2559
ENST00000218104.5:6-297	ENST00000218104.5	6	297	17	33	7	-4.2559
ENST00000218104.5:75-297	ENST00000218104.5	75	297	16	33	6	-4.41463
ENST00000218104.5:89-212	ENST00000218104.5	89	212	4	15	24	-3.90689
ENST00000218104.5:98-212	ENST00000218104.5	98	212	4	9	16	-3.09039
ENST00000218340.3:12-123	ENST00000218340.3	12	123	1	3	3	-1.09954
ENST00000218340.3:3-123	ENST00000218340.3	3	123	1	3	3	-1.09954
ENST00000218340.3:30-123	ENST00000218340.3	30	123	1	3	3	-1.09954
ENST00000218340.3:40-112	ENST00000218340.3	40	112	0	1	1	-1
ENST00000218340.3:6-123	ENST00000218340.3	6	123	1	3	3	-1.09954
ENST00000218340.3:60-123	ENST00000218340.3	60	123	1	3	3	-1.09954
ENST00000218340.3:72-123	ENST00000218340.3	72	123	1	3	3	-1.09954
ENST00000218340.3:98-128	ENST00000218340.3	98	128	3	1	3	1.09954
ENST00000218388.8:10-25	ENST00000218388.8	10	25	2	29	1	-5.59432
ENST00000218388.8:13-25	ENST00000218388.8	13	25	2	29	1	-5.59432
ENST00000218388.8:17-29	ENST00000218388.8	17	29	29	1	0	5.7866
ENST00000218388.8:21-108	ENST00000218388.8	21	108	5	1	1	2.47805
ENST00000218388.8:51-108	ENST00000218388.8	51	108	4	1	0	2.63227
ENST00000218388.8:69-108	ENST00000218388.8	69	108	4	1	0	2.63227
ENST00000218388.8:7-25	ENST00000218388.8	7	25	2	29	1	-5.59432
ENST00000219069.5:129-174	ENST00000219069.5	129	174	1	0	1	1
ENST00000219069.5:136-208	ENST00000219069.5	136	208	0	1	1	-1
ENST00000219069.5:141-174	ENST00000219069.5	141	174	1	0	1	1
ENST00000219069.5:166-208	ENST00000219069.5	166	208	0	1	1	-1
ENST00000219069.5:28-208	ENST00000219069.5	28	208	0	1	1	-1
ENST00000219069.5:4-208	ENST00000219069.5	4	208	0	1	1	-1
ENST00000219069.5:440-503	ENST00000219069.5	440	503	1	2	0	-1.58496
ENST00000219069.5:450-477	ENST00000219069.5	450	477	1	0	1	1
ENST00000219069.5:456-477	ENST00000219069.5	456	477	1	0	1	1
ENST00000219069.5:458-503	ENST00000219069.5	458	503	1	2	0	-1.58496
ENST00000219069.5:468-477	ENST00000219069.5	468	477	1	0	1	1
ENST00000219069.5:476-503	ENST00000219069.5	476	503	1	2	0	-1.58496
ENST00000219069.5:483-705	ENST00000219069.5	483	705	5	20	1	-4.59418
ENST00000219069.5:530-590	ENST00000219069.5	530	590	0	2	0	-2.32193
ENST00000219069.5:536-590	ENST00000219069.5	536	590	0	2	0	-2.32193
ENST00000219069.5:542-590	ENST00000219069.5	542	590	0	2	0	-2.32193
ENST00000219069.5:551-590	ENST00000219069.5	551	590	0	2	0	-2.32193
ENST00000219069.5:558-705	ENST00000219069.5	558	705	4	20	1	-4.70266
ENST00000219069.5:572-590	ENST00000219069.5	572	590	0	2	0	-2.32193
ENST00000219069.5:586-619	ENST00000219069.5	586	619	1	1	0	1
ENST00000219069.5:597-705	ENST00000219069.5	597	705	2	20	1	-4.94608
ENST00000219069.5:615-705	ENST00000219069.5	615	705	2	20	0	-5.09132
ENST00000219069.5:624-705	ENST00000219069.5	624	705	2	19	0	-5.00643
ENST00000219069.5:654-705	ENST00000219069.5	654	705	0	6	0	-3.70044
ENST00000219069.5:663-705	ENST00000219069.5	663	705	0	6	0	-3.70044
ENST00000219204.7:146-197	ENST00000219204.7	146	197	0	16	5	-4.3322
ENST00000219204.7:167-197	ENST00000219204.7	167	197	0	16	3	-4.57544
ENST00000219343.10:23-155	ENST00000219343.10	23	155	12	1	5	3.5025
ENST00000219343.10:54-81	ENST00000219343.10	54	81	0	5	12	-3.78905
ENST00000219439.8:48-120	ENST00000219439.8	48	120	2	1	2	0.485427
ENST00000219454.9:103-193	ENST00000219454.9	103	193	0	3	9	-3.52356
ENST00000219454.9:113-122	ENST00000219454.9	113	122	1	3	0	-2.16993
ENST00000219454.9:170-221	ENST00000219454.9	170	221	4	15	0	-4.32572
ENST00000219454.9:172-193	ENST00000219454.9	172	193	0	2	5	-2.6845
ENST00000219454.9:175-193	ENST00000219454.9	175	193	0	2	5	-2.6845
ENST00000219454.9:179-221	ENST00000219454.9	179	221	4	14	0	-4.1964
ENST00000219454.9:49-193	ENST00000219454.9	49	193	0	3	9	-3.52356
ENST00000219454.9:52-193	ENST00000219454.9	52	193	0	3	9	-3.52356
ENST00000219454.9:65-122	ENST00000219454.9	65	122	1	3	0	-2.16993
ENST00000219454.9:70-193	ENST00000219454.9	70	193	0	3	9	-3.52356
ENST00000219454.9:74-122	ENST00000219454.9	74	122	1	3	0	-2.16993
ENST00000219454.9:79-193	ENST00000219454.9	79	193	0	3	9	-3.52356
ENST00000219454.9:85-193	ENST00000219454.9	85	193	0	3	9	-3.52356
ENST00000219454.9:90-132	ENST00000219454.9	90	132	3	0	1	2.16993
ENST00000219454.9:94-193	ENST00000219454.9	94	193	0	3	9	-3.52356
ENST00000219473.11:18-102	ENST00000219473.11	18	102	2	12	47	-5.80524
ENST00000219473.11:24-102	ENST00000219473.11	24	102	2	12	47	-5.80524
ENST00000219473.11:30-102	ENST00000219473.11	30	102	2	12	47	-5.80524
ENST00000219473.11:46-73	ENST00000219473.11	46	73	4	47	0	-6.33775
ENST00000219473.11:69-102	ENST00000219473.11	69	102	2	6	0	-3
ENST00000219611.6:130-316	ENST00000219611.6	130	316	9	2	2	3.09398
ENST00000219611.6:147-258	ENST00000219611.6	147	258	1	9	2	-3.39232
ENST00000219611.6:166-316	ENST00000219611.6	166	316	9	2	0	3.72048
ENST00000219611.6:168-258	ENST00000219611.6	168	258	0	9	2	-3.72048
ENST00000219611.6:186-258	ENST00000219611.6	186	258	0	7	1	-3.55459
ENST00000219611.6:204-258	ENST00000219611.6	204	258	0	5	1	-3
ENST00000219611.6:212-263	ENST00000219611.6	212	263	1	0	5	-3
ENST00000219611.6:215-263	ENST00000219611.6	215	263	1	0	5	-3
ENST00000219611.6:240-258	ENST00000219611.6	240	258	0	3	0	-2.80735
ENST00000219611.6:82-316	ENST00000219611.6	82	316	11	2	2	3.56071
ENST00000219611.6:84-258	ENST00000219611.6	84	258	2	11	2	-3.56071
ENST00000219611.6:9-258	ENST00000219611.6	9	258	2	11	2	-3.56071
ENST00000220003.13:118-619	ENST00000220003.13	118	619	35	15	16	3.64909
ENST00000220003.13:135-591	ENST00000220003.13	135	591	15	34	14	-3.71097
ENST00000220003.13:151-619	ENST00000220003.13	151	619	35	15	16	3.64909
ENST00000220003.13:165-591	ENST00000220003.13	165	591	15	34	14	-3.71097
ENST00000220003.13:173-224	ENST00000220003.13	173	224	1	4	2	-1.58496
ENST00000220003.13:201-591	ENST00000220003.13	201	591	15	32	14	-3.46801
ENST00000220003.13:258-591	ENST00000220003.13	258	591	11	31	13	-3.83151
ENST00000220003.13:281-683	ENST00000220003.13	281	683	13	12	29	-3.47393
ENST00000220003.13:345-591	ENST00000220003.13	345	591	8	28	7	-4.36327
ENST00000220003.13:366-591	ENST00000220003.13	366	591	3	18	3	-4.30378
ENST00000220003.13:390-591	ENST00000220003.13	390	591	1	8	3	-2.90689
ENST00000220003.13:413-683	ENST00000220003.13	413	683	4	2	9	-2.63227
ENST00000220003.13:479-683	ENST00000220003.13	479	683	3	2	3	0.321928
ENST00000220003.13:493-619	ENST00000220003.13	493	619	3	3	2	0.321928
ENST00000220003.13:499-619	ENST00000220003.13	499	619	2	2	2	0
ENST00000220003.13:503-683	ENST00000220003.13	503	683	2	2	2	0
ENST00000220003.13:527-683	ENST00000220003.13	527	683	2	2	2	0
ENST00000220003.13:53-224	ENST00000220003.13	53	224	1	4	5	-1.848
ENST00000220003.13:78-591	ENST00000220003.13	78	591	15	36	14	-3.93037
ENST00000220003.13:9-591	ENST00000220003.13	9	591	15	36	14	-3.93037
ENST00000220003.13:93-591	ENST00000220003.13	93	591	15	34	14	-3.71097
ENST00000220509.9:110-197	ENST00000220509.9	110	197	20	34	18	-2.87447
ENST00000220509.9:118-166	ENST00000220509.9	118	166	14	9	25	-3.22882
ENST00000220509.9:135-300	ENST00000220509.9	135	300	37	23	34	2.15966
ENST00000220509.9:142-166	ENST00000220509.9	142	166	5	8	19	-3.48382
ENST00000220509.9:158-197	ENST00000220509.9	158	197	15	25	6	-3.67611
ENST00000220509.9:207-300	ENST00000220509.9	207	300	6	6	15	-2.80735
ENST00000220509.9:211-289	ENST00000220509.9	211	289	6	15	5	-3
ENST00000220509.9:228-300	ENST00000220509.9	228	300	3	2	14	-3.90689
ENST00000220509.9:238-289	ENST00000220509.9	238	289	2	14	3	-3.90689
ENST00000220509.9:26-197	ENST00000220509.9	26	197	27	35	21	-2.19101
ENST00000220509.9:268-289	ENST00000220509.9	268	289	0	0	2	-2.32193
ENST00000220509.9:31-82	ENST00000220509.9	31	82	2	7	1	-2.848
ENST00000220509.9:45-69	ENST00000220509.9	45	69	0	0	2	-2.32193
ENST00000220509.9:55-82	ENST00000220509.9	55	82	2	6	1	-2.5025
ENST00000220509.9:65-197	ENST00000220509.9	65	197	24	35	21	-2.34341
ENST00000220509.9:76-82	ENST00000220509.9	76	82	2	4	1	-1.58496
ENST00000220509.9:78-93	ENST00000220509.9	78	93	1	3	0	-2.16993
ENST00000220847.8:1-85	ENST00000220847.8	1	85	0	3	10	-3.71741
ENST00000220847.8:34-85	ENST00000220847.8	34	85	0	3	10	-3.71741
ENST00000220847.8:4-85	ENST00000220847.8	4	85	0	3	10	-3.71741
ENST00000220847.8:68-95	ENST00000220847.8	68	95	3	15	0	-4.45943
ENST00000220847.8:81-291	ENST00000220847.8	81	291	11	0	1	4.2854
ENST00000221132.7:17-56	ENST00000221132.7	17	56	2	0	0	2.32193
ENST00000221132.7:22-31	ENST00000221132.7	22	31	0	2	0	-2.32193
ENST00000221132.7:7-31	ENST00000221132.7	7	31	0	2	0	-2.32193
ENST00000221138.8:11-89	ENST00000221138.8	11	89	4	0	0	3.16993
ENST00000221138.8:17-89	ENST00000221138.8	17	89	4	0	0	3.16993
ENST00000221138.8:20-89	ENST00000221138.8	20	89	4	0	0	3.16993
ENST00000221138.8:284-365	ENST00000221138.8	284	365	3	4	2	-0.736966
ENST00000221138.8:287-365	ENST00000221138.8	287	365	3	4	2	-0.736966
ENST00000221138.8:311-365	ENST00000221138.8	311	365	3	4	2	-0.736966
ENST00000221138.8:38-89	ENST00000221138.8	38	89	4	0	0	3.16993
ENST00000221138.8:41-89	ENST00000221138.8	41	89	4	0	0	3.16993
ENST00000221138.8:50-89	ENST00000221138.8	50	89	4	0	0	3.16993
ENST00000221138.8:54-180	ENST00000221138.8	54	180	17	1	4	4.37346
ENST00000221138.8:71-89	ENST00000221138.8	71	89	4	0	0	3.16993
ENST00000221138.8:9-180	ENST00000221138.8	9	180	17	1	4	4.37346
ENST00000221232.9:270-306	ENST00000221232.9	270	306	8	21	3	-4.10329
ENST00000221232.9:291-306	ENST00000221232.9	291	306	2	4	1	-1.58496
ENST00000221265.7:137-299	ENST00000221265.7	137	299	13	2	27	-4.5502
ENST00000221265.7:140-299	ENST00000221265.7	140	299	12	2	27	-4.59519
ENST00000221265.7:166-259	ENST00000221265.7	166	259	21	12	0	4.40475
ENST00000221265.7:20-299	ENST00000221265.7	20	299	13	3	27	-4.41136
ENST00000221265.7:79-160	ENST00000221265.7	79	160	4	1	1	2
ENST00000221265.7:95-299	ENST00000221265.7	95	299	13	3	27	-4.41136
ENST00000221418.8:140-188	ENST00000221418.8	140	188	5	0	0	3.45943
ENST00000221418.8:155-188	ENST00000221418.8	155	188	5	0	0	3.45943
ENST00000221462.8:109-235	ENST00000221462.8	109	235	1	7	3	-2.60666
ENST00000221462.8:15-99	ENST00000221462.8	15	99	0	2	1	-1.58496
ENST00000221462.8:30-99	ENST00000221462.8	30	99	0	2	1	-1.58496
ENST00000221462.8:40-235	ENST00000221462.8	40	235	3	8	3	-2.19265
ENST00000221462.8:47-122	ENST00000221462.8	47	122	1	0	2	-1.58496
ENST00000221462.8:61-235	ENST00000221462.8	61	235	3	8	3	-2.19265
ENST00000221462.8:85-235	ENST00000221462.8	85	235	2	7	3	-2.16993
ENST00000221462.8:9-99	ENST00000221462.8	9	99	0	2	1	-1.58496
ENST00000221486.4:50-62	ENST00000221486.4	50	62	0	3	0	-2.80735
ENST00000221494.9:251-425	ENST00000221494.9	251	425	3	4	1	-1.45943
ENST00000221494.9:317-425	ENST00000221494.9	317	425	3	4	1	-1.45943
ENST00000221494.9:326-425	ENST00000221494.9	326	425	3	4	1	-1.45943
ENST00000221494.9:344-425	ENST00000221494.9	344	425	3	4	1	-1.45943
ENST00000221494.9:380-425	ENST00000221494.9	380	425	3	4	1	-1.45943
ENST00000221494.9:395-425	ENST00000221494.9	395	425	3	2	1	1
ENST00000221494.9:398-425	ENST00000221494.9	398	425	3	2	1	1
ENST00000221494.9:410-425	ENST00000221494.9	410	425	2	2	1	0.485427
ENST00000221801.7:42-75	ENST00000221801.7	42	75	0	13	0	-4.75489
ENST00000221801.7:63-75	ENST00000221801.7	63	75	0	12	0	-4.64386
ENST00000221855.7:117-159	ENST00000221855.7	117	159	6	11	3	-2.56071
ENST00000221855.7:123-159	ENST00000221855.7	123	159	5	8	3	-1.75489
ENST00000221855.7:126-159	ENST00000221855.7	126	159	3	8	3	-2.19265
ENST00000221855.7:143-212	ENST00000221855.7	143	212	1	4	2	-1.58496
ENST00000221855.7:146-212	ENST00000221855.7	146	212	1	2	1	-0.584963
ENST00000221855.7:170-212	ENST00000221855.7	170	212	0	2	1	-1.58496
ENST00000221855.7:199-487	ENST00000221855.7	199	487	0	3	3	-2
ENST00000221855.7:208-487	ENST00000221855.7	208	487	0	3	3	-2
ENST00000221855.7:218-338	ENST00000221855.7	218	338	1	3	0	-2.16993
ENST00000221855.7:224-338	ENST00000221855.7	224	338	1	3	0	-2.16993
ENST00000221855.7:248-338	ENST00000221855.7	248	338	1	3	0	-2.16993
ENST00000221855.7:260-338	ENST00000221855.7	260	338	1	3	0	-2.16993
ENST00000221855.7:296-338	ENST00000221855.7	296	338	1	3	0	-2.16993
ENST00000221855.7:301-487	ENST00000221855.7	301	487	0	3	3	-2
ENST00000221855.7:334-487	ENST00000221855.7	334	487	0	2	0	-2.32193
ENST00000221855.7:37-67	ENST00000221855.7	37	67	1	2	1	-0.584963
ENST00000221855.7:42-72	ENST00000221855.7	42	72	2	1	2	0.485427
ENST00000221855.7:55-67	ENST00000221855.7	55	67	1	1	1	0
ENST00000221855.7:72-159	ENST00000221855.7	72	159	15	31	15	-3.23165
ENST00000221855.7:85-487	ENST00000221855.7	85	487	32	18	20	2.5642
ENST00000221856.10:1-25	ENST00000221856.10	1	25	4	1	0	2.63227
ENST00000221856.10:10-25	ENST00000221856.10	10	25	4	1	0	2.63227
ENST00000221856.10:13-25	ENST00000221856.10	13	25	4	1	0	2.63227
ENST00000221930.5:110-554	ENST00000221930.5	110	554	4	18	21	-3.64251
ENST00000221930.5:191-554	ENST00000221930.5	191	554	3	7	10	-2.23266
ENST00000221930.5:296-554	ENST00000221930.5	296	554	3	4	7	-1.51457
ENST00000221930.5:302-554	ENST00000221930.5	302	554	3	4	3	-0.263034
ENST00000221930.5:328-571	ENST00000221930.5	328	571	2	1	0	1.58496
ENST00000221930.5:590-737	ENST00000221930.5	590	737	10	3	9	2.29546
ENST00000221930.5:607-667	ENST00000221930.5	607	667	7	7	0	3
ENST00000221930.5:719-737	ENST00000221930.5	719	737	1	0	1	1
ENST00000222120.7:156-222	ENST00000222120.7	156	222	2	8	1	-3.14048
ENST00000222120.7:51-222	ENST00000222120.7	51	222	2	8	1	-3.14048
ENST00000222120.7:54-222	ENST00000222120.7	54	222	2	8	1	-3.14048
ENST00000222219.7:0-39	ENST00000222219.7	0	39	1	5	7	-2.40808
ENST00000222219.7:30-39	ENST00000222219.7	30	39	1	5	7	-2.40808
ENST00000222219.7:33-39	ENST00000222219.7	33	39	1	5	0	-3
ENST00000222254.12:118-286	ENST00000222254.12	118	286	21	6	4	4.14647
ENST00000222254.12:129-294	ENST00000222254.12	129	294	4	44	9	-5.67243
ENST00000222254.12:13-286	ENST00000222254.12	13	286	25	7	4	4.49185
ENST00000222254.12:139-286	ENST00000222254.12	139	286	20	6	4	4.01792
ENST00000222254.12:142-286	ENST00000222254.12	142	286	20	6	4	4.01792
ENST00000222254.12:149-344	ENST00000222254.12	149	344	10	6	43	-5.42399
ENST00000222254.12:160-286	ENST00000222254.12	160	286	20	6	4	4.01792
ENST00000222254.12:191-344	ENST00000222254.12	191	344	10	6	43	-5.42399
ENST00000222254.12:201-294	ENST00000222254.12	201	294	4	43	9	-5.62205
ENST00000222254.12:204-294	ENST00000222254.12	204	294	4	43	9	-5.62205
ENST00000222254.12:212-344	ENST00000222254.12	212	344	8	3	40	-5.59729
ENST00000222254.12:220-286	ENST00000222254.12	220	286	17	4	1	4.37346
ENST00000222254.12:229-286	ENST00000222254.12	229	286	14	4	1	3.96639
ENST00000222254.12:233-344	ENST00000222254.12	233	344	8	3	37	-5.43045
ENST00000222254.12:236-344	ENST00000222254.12	236	344	8	3	37	-5.43045
ENST00000222254.12:260-344	ENST00000222254.12	260	344	7	3	28	-4.88136
ENST00000222254.12:270-294	ENST00000222254.12	270	294	1	25	3	-5.2361
ENST00000222254.12:282-294	ENST00000222254.12	282	294	0	23	3	-5.21245
ENST00000222254.12:60-294	ENST00000222254.12	60	294	4	48	10	-5.80985
ENST00000222254.12:90-294	ENST00000222254.12	90	294	4	46	9	-5.76886
ENST00000222307.8:10-70	ENST00000222307.8	10	70	3	3	0	2
ENST00000222307.8:40-70	ENST00000222307.8	40	70	3	3	0	2
ENST00000222399.10:0-81	ENST00000222399.10	0	81	1	7	0	-3.55459
ENST00000222399.10:36-81	ENST00000222399.10	36	81	1	7	0	-3.55459
ENST00000222547.7:21-78	ENST00000222547.7	21	78	6	48	7	-5.84528
ENST00000222547.7:24-78	ENST00000222547.7	24	78	6	48	7	-5.84528
ENST00000222553.7:1-214	ENST00000222553.7	1	214	15	1	0	4.77479
ENST00000222553.7:155-236	ENST00000222553.7	155	236	2	4	16	-4.05627
ENST00000222553.7:210-219	ENST00000222553.7	210	219	0	15	2	-4.6095
ENST00000222553.7:43-214	ENST00000222553.7	43	214	15	1	0	4.77479
ENST00000222553.7:89-236	ENST00000222553.7	89	236	2	4	16	-4.05627
ENST00000222553.7:97-214	ENST00000222553.7	97	214	15	1	0	4.77479
ENST00000222573.4:140-566	ENST00000222573.4	140	566	3	1	1	1.37851
ENST00000222573.4:155-566	ENST00000222573.4	155	566	3	1	1	1.37851
ENST00000222573.4:269-566	ENST00000222573.4	269	566	3	1	1	1.37851
ENST00000222573.4:305-566	ENST00000222573.4	305	566	3	1	1	1.37851
ENST00000222573.4:312-498	ENST00000222573.4	312	498	1	1	3	-1.37851
ENST00000222573.4:333-498	ENST00000222573.4	333	498	1	1	3	-1.37851
ENST00000222573.4:359-566	ENST00000222573.4	359	566	3	1	1	1.37851
ENST00000222573.4:374-566	ENST00000222573.4	374	566	3	1	1	1.37851
ENST00000222573.4:385-586	ENST00000222573.4	385	586	1	13	1	-4.33628
ENST00000222573.4:420-498	ENST00000222573.4	420	498	1	1	3	-1.37851
ENST00000222573.4:436-586	ENST00000222573.4	436	586	1	13	0	-4.5502
ENST00000222573.4:466-586	ENST00000222573.4	466	586	0	10	0	-4.39232
ENST00000222573.4:499-586	ENST00000222573.4	499	586	0	10	0	-4.39232
ENST00000222573.4:559-586	ENST00000222573.4	559	586	0	10	0	-4.39232
ENST00000222573.4:568-586	ENST00000222573.4	568	586	0	10	0	-4.39232
ENST00000222573.4:577-586	ENST00000222573.4	577	586	0	10	0	-4.39232
ENST00000222803.9:104-122	ENST00000222803.9	104	122	2	0	1	1.58496
ENST00000222803.9:118-151	ENST00000222803.9	118	151	3	5	0	-2.52356
ENST00000222803.9:13-79	ENST00000222803.9	13	79	1	2	13	-4.13955
ENST00000222803.9:139-151	ENST00000222803.9	139	151	1	3	0	-2.16993
ENST00000222803.9:145-151	ENST00000222803.9	145	151	0	3	0	-2.80735
ENST00000222803.9:25-79	ENST00000222803.9	25	79	1	2	13	-4.13955
ENST00000222803.9:28-79	ENST00000222803.9	28	79	1	2	13	-4.13955
ENST00000222803.9:35-53	ENST00000222803.9	35	53	2	8	0	-3.51096
ENST00000222803.9:37-79	ENST00000222803.9	37	79	0	2	13	-4.36457
ENST00000222803.9:42-69	ENST00000222803.9	42	69	13	0	0	4.75489
ENST00000222803.9:6-69	ENST00000222803.9	6	69	13	1	2	4.13955
ENST00000222803.9:65-101	ENST00000222803.9	65	101	0	9	1	-3.96347
ENST00000222803.9:71-101	ENST00000222803.9	71	101	0	4	1	-2.63227
ENST00000222803.9:75-114	ENST00000222803.9	75	114	4	1	0	2.63227
ENST00000222803.9:84-114	ENST00000222803.9	84	114	4	1	0	2.63227
ENST00000222803.9:97-151	ENST00000222803.9	97	151	3	5	0	-2.52356
ENST00000222969.9:110-215	ENST00000222969.9	110	215	43	25	0	5.39736
ENST00000222969.9:114-246	ENST00000222969.9	114	246	25	0	43	-5.39736
ENST00000222969.9:118-166	ENST00000222969.9	118	166	0	43	18	-5.55056
ENST00000222969.9:137-215	ENST00000222969.9	137	215	43	22	0	5.4488
ENST00000222969.9:142-166	ENST00000222969.9	142	166	0	43	15	-5.65179
ENST00000222969.9:144-246	ENST00000222969.9	144	246	22	0	40	-5.3161
ENST00000222969.9:155-215	ENST00000222969.9	155	215	40	21	0	5.33546
ENST00000222969.9:162-246	ENST00000222969.9	162	246	16	0	1	4.87543
ENST00000222969.9:29-71	ENST00000222969.9	29	71	2	6	5	-1.58496
ENST00000222969.9:31-166	ENST00000222969.9	31	166	6	44	29	-4.84914
ENST00000222969.9:42-114	ENST00000222969.9	42	114	11	6	1	3.22239
ENST00000222969.9:57-114	ENST00000222969.9	57	114	9	6	1	2.83289
ENST00000222969.9:63-114	ENST00000222969.9	63	114	7	5	1	2.40808
ENST00000222969.9:67-166	ENST00000222969.9	67	166	1	44	23	-5.38523
ENST00000222969.9:83-215	ENST00000222969.9	83	215	44	30	1	5.30305
ENST00000222969.9:88-166	ENST00000222969.9	88	166	1	44	23	-5.38523
ENST00000222969.9:98-215	ENST00000222969.9	98	215	44	29	0	5.39655
ENST00000223023.4:10-235	ENST00000223023.4	10	235	2	20	0	-5.09132
ENST00000223023.4:106-235	ENST00000223023.4	106	235	1	14	0	-4.66676
ENST00000223023.4:118-235	ENST00000223023.4	118	235	1	14	0	-4.66676
ENST00000223023.4:154-235	ENST00000223023.4	154	235	1	11	0	-4.2854
ENST00000223023.4:172-235	ENST00000223023.4	172	235	1	11	0	-4.2854
ENST00000223023.4:28-235	ENST00000223023.4	28	235	2	20	0	-5.09132
ENST00000223023.4:76-235	ENST00000223023.4	76	235	1	18	0	-5.05813
ENST00000223061.5:103-253	ENST00000223061.5	103	253	7	31	0	-5.41741
ENST00000223061.5:109-253	ENST00000223061.5	109	253	7	31	0	-5.41741
ENST00000223061.5:151-253	ENST00000223061.5	151	253	7	31	0	-5.41741
ENST00000223061.5:169-253	ENST00000223061.5	169	253	7	31	0	-5.41741
ENST00000223061.5:178-253	ENST00000223061.5	178	253	7	31	0	-5.41741
ENST00000223061.5:184-253	ENST00000223061.5	184	253	7	31	0	-5.41741
ENST00000223061.5:193-253	ENST00000223061.5	193	253	7	29	0	-5.29155
ENST00000223061.5:196-253	ENST00000223061.5	196	253	7	29	0	-5.29155
ENST00000223061.5:199-253	ENST00000223061.5	199	253	7	29	0	-5.29155
ENST00000223061.5:211-253	ENST00000223061.5	211	253	6	29	0	-5.36357
ENST00000223061.5:214-253	ENST00000223061.5	214	253	6	27	0	-5.23057
ENST00000223061.5:217-253	ENST00000223061.5	217	253	6	26	0	-5.15987
ENST00000223061.5:235-253	ENST00000223061.5	235	253	3	26	0	-5.42163
ENST00000223061.5:238-253	ENST00000223061.5	238	253	3	26	0	-5.42163
ENST00000223061.5:244-253	ENST00000223061.5	244	253	0	14	0	-4.85798
ENST00000223127.7:126-231	ENST00000223127.7	126	231	9	1	10	-3.05311
ENST00000223127.7:15-231	ENST00000223127.7	15	231	16	4	14	3.05209
ENST00000223127.7:196-262	ENST00000223127.7	196	262	2	10	10	-2.76939
ENST00000223127.7:202-262	ENST00000223127.7	202	262	1	10	10	-3.12338
ENST00000223127.7:240-354	ENST00000223127.7	240	354	1	8	0	-3.77259
ENST00000223127.7:273-354	ENST00000223127.7	273	354	0	7	0	-3.90689
ENST00000223127.7:72-231	ENST00000223127.7	72	231	16	4	14	3.05209
ENST00000223127.7:94-262	ENST00000223127.7	94	262	4	16	17	-3.24587
ENST00000223127.7:96-231	ENST00000223127.7	96	231	16	2	13	3.52558
ENST00000223136.4:1-49	ENST00000223136.4	1	49	23	1111	36	-10.9662
ENST00000223136.4:28-49	ENST00000223136.4	28	49	23	1110	36	-10.9648
ENST00000223136.4:35-56	ENST00000223136.4	35	56	1110	38	23	10.9597
ENST00000223136.4:37-49	ENST00000223136.4	37	49	23	1092	36	-10.9387
ENST00000223145.9:111-189	ENST00000223145.9	111	189	9	7	1	2.8314
ENST00000223145.9:143-224	ENST00000223145.9	143	224	1	21	8	-4.43296
ENST00000223145.9:149-224	ENST00000223145.9	149	224	1	21	8	-4.43296
ENST00000223145.9:16-31	ENST00000223145.9	16	31	0	5	1	-3
ENST00000223145.9:164-224	ENST00000223145.9	164	224	1	21	8	-4.43296
ENST00000223145.9:168-189	ENST00000223145.9	168	189	9	4	0	3.37638
ENST00000223145.9:176-224	ENST00000223145.9	176	224	0	20	4	-4.85798
ENST00000223145.9:185-224	ENST00000223145.9	185	224	0	12	2	-4.22607
ENST00000223145.9:197-224	ENST00000223145.9	197	224	0	12	2	-4.22607
ENST00000223145.9:216-303	ENST00000223145.9	216	303	8	9	6	-0.685891
ENST00000223145.9:23-224	ENST00000223145.9	23	224	1	22	16	-4.24793
ENST00000223145.9:246-303	ENST00000223145.9	246	303	2	8	6	-2.16993
ENST00000223145.9:249-303	ENST00000223145.9	249	303	2	7	6	-1.926
ENST00000223145.9:4-31	ENST00000223145.9	4	31	0	5	1	-3
ENST00000223145.9:60-189	ENST00000223145.9	60	189	9	14	1	-3.55459
ENST00000223500.8:22-109	ENST00000223500.8	22	109	0	6	0	-3.70044
ENST00000223500.8:37-109	ENST00000223500.8	37	109	0	6	0	-3.70044
ENST00000223500.8:43-109	ENST00000223500.8	43	109	0	6	0	-3.70044
ENST00000223500.8:49-109	ENST00000223500.8	49	109	0	6	0	-3.70044
ENST00000223500.8:76-109	ENST00000223500.8	76	109	0	6	0	-3.70044
ENST00000223500.8:82-109	ENST00000223500.8	82	109	0	6	0	-3.70044
ENST00000223500.8:94-109	ENST00000223500.8	94	109	0	6	0	-3.70044
ENST00000224140.5:102-144	ENST00000224140.5	102	144	10	5	3	2.41504
ENST00000224140.5:106-163	ENST00000224140.5	106	163	4	3	6	-1.05445
ENST00000224140.5:116-134	ENST00000224140.5	116	134	0	6	0	-3.70044
ENST00000224140.5:120-144	ENST00000224140.5	120	144	6	2	0	3
ENST00000224140.5:31-46	ENST00000224140.5	31	46	0	5	0	-3.45943
ENST00000224140.5:52-106	ENST00000224140.5	52	106	3	2	11	-3.33985
ENST00000224140.5:71-134	ENST00000224140.5	71	134	5	17	4	-3.70895
ENST00000224140.5:79-106	ENST00000224140.5	79	106	3	2	4	-0.736966
ENST00000224140.5:92-134	ENST00000224140.5	92	134	5	10	4	-2.09192
ENST00000225171.6:108-144	ENST00000225171.6	108	144	2	8	3	-2.52838
ENST00000225171.6:11-77	ENST00000225171.6	11	77	2	25	56	-5.75714
ENST00000225171.6:15-66	ENST00000225171.6	15	66	24	56	2	-5.78008
ENST00000225171.6:17-77	ENST00000225171.6	17	77	2	25	56	-5.75714
ENST00000225171.6:45-66	ENST00000225171.6	45	66	24	56	1	-5.84595
ENST00000225171.6:47-77	ENST00000225171.6	47	77	1	24	43	-5.32299
ENST00000225171.6:54-66	ENST00000225171.6	54	66	23	43	1	-5.34065
ENST00000225171.6:57-66	ENST00000225171.6	57	66	7	29	0	-5.29155
ENST00000225174.7:14-26	ENST00000225174.7	14	26	5	2	0	2.6845
ENST00000225296.7:103-148	ENST00000225296.7	103	148	4	0	2	2.32193
ENST00000225296.7:34-148	ENST00000225296.7	34	148	4	0	2	2.32193
ENST00000225296.7:67-148	ENST00000225296.7	67	148	4	0	2	2.32193
ENST00000225296.7:79-148	ENST00000225296.7	79	148	4	0	2	2.32193
ENST00000225603.8:10-133	ENST00000225603.8	10	133	10	7	0	3.36375
ENST00000225603.8:100-133	ENST00000225603.8	100	133	10	5	0	3.45943
ENST00000225603.8:118-133	ENST00000225603.8	118	133	10	4	0	3.56768
ENST00000225603.8:28-133	ENST00000225603.8	28	133	10	7	0	3.36375
ENST00000225603.8:34-133	ENST00000225603.8	34	133	10	7	0	3.36375
ENST00000225603.8:64-133	ENST00000225603.8	64	133	10	7	0	3.36375
ENST00000225603.8:7-133	ENST00000225603.8	7	133	10	7	0	3.36375
ENST00000225603.8:85-133	ENST00000225603.8	85	133	10	5	0	3.45943
ENST00000225655.5:127-319	ENST00000225655.5	127	319	16	5	6	3.20511
ENST00000225655.5:136-319	ENST00000225655.5	136	319	16	5	6	3.20511
ENST00000225655.5:143-335	ENST00000225655.5	143	335	5	6	16	-3.20511
ENST00000225655.5:156-435	ENST00000225655.5	156	435	7	32	9	-4.65105
ENST00000225655.5:180-435	ENST00000225655.5	180	435	7	31	8	-4.64636
ENST00000225655.5:192-435	ENST00000225655.5	192	435	7	31	8	-4.64636
ENST00000225655.5:210-435	ENST00000225655.5	210	435	7	31	7	-4.73335
ENST00000225655.5:224-335	ENST00000225655.5	224	335	3	5	10	-2.41504
ENST00000225655.5:231-435	ENST00000225655.5	231	435	5	26	7	-4.47317
ENST00000225655.5:279-435	ENST00000225655.5	279	435	5	26	7	-4.47317
ENST00000225655.5:284-335	ENST00000225655.5	284	335	3	4	10	-2.59904
ENST00000225655.5:301-319	ENST00000225655.5	301	319	9	0	3	3.52356
ENST00000225655.5:310-319	ENST00000225655.5	310	319	3	0	0	2.80735
ENST00000225655.5:337-427	ENST00000225655.5	337	427	16	4	1	4.24793
ENST00000225655.5:343-427	ENST00000225655.5	343	427	16	4	1	4.24793
ENST00000225655.5:355-427	ENST00000225655.5	355	427	11	4	1	3.44294
ENST00000225655.5:364-427	ENST00000225655.5	364	427	8	4	1	2.7425
ENST00000225655.5:387-435	ENST00000225655.5	387	435	1	7	4	-2.45943
ENST00000225655.5:417-435	ENST00000225655.5	417	435	1	6	4	-2.15528
ENST00000225665.11:116-230	ENST00000225665.11	116	230	0	2	0	-2.32193
ENST00000225665.11:98-230	ENST00000225665.11	98	230	2	7	1	-2.848
ENST00000225724.9:12-57	ENST00000225724.9	12	57	1	1	0	1
ENST00000225724.9:9-57	ENST00000225724.9	9	57	1	1	0	1
ENST00000225726.9:142-220	ENST00000225726.9	142	220	1	2	5	-2.08746
ENST00000225726.9:181-220	ENST00000225726.9	181	220	1	2	5	-2.08746
ENST00000225726.9:185-203	ENST00000225726.9	185	203	2	5	0	-2.6845
ENST00000225737.10:37-115	ENST00000225737.10	37	115	2	10	0	-3.90689
ENST00000225972.7:121-163	ENST00000225972.7	121	163	1	15	0	-4.77479
ENST00000225972.7:144-168	ENST00000225972.7	144	168	1	0	12	-4.42368
ENST00000225972.7:148-163	ENST00000225972.7	148	163	0	12	0	-4.64386
ENST00000225972.7:19-163	ENST00000225972.7	19	163	2	20	0	-5.09132
ENST00000225972.7:22-163	ENST00000225972.7	22	163	2	19	0	-5.00643
ENST00000225972.7:24-168	ENST00000225972.7	24	168	1	2	19	-4.85345
ENST00000225972.7:30-168	ENST00000225972.7	30	168	1	2	19	-4.85345
ENST00000225972.7:36-168	ENST00000225972.7	36	168	1	2	19	-4.85345
ENST00000225972.7:57-168	ENST00000225972.7	57	168	1	2	19	-4.85345
ENST00000225972.7:6-168	ENST00000225972.7	6	168	1	2	20	-4.94608
ENST00000225972.7:82-163	ENST00000225972.7	82	163	2	19	0	-5.00643
ENST00000226225.6:11-53	ENST00000226225.6	11	53	4	83	6	-7.04334
ENST00000226225.6:114-159	ENST00000226225.6	114	159	2	21	0	-5.17167
ENST00000226225.6:126-159	ENST00000226225.6	126	159	2	17	0	-4.82085
ENST00000226225.6:150-159	ENST00000226225.6	150	159	2	2	0	1.58496
ENST00000226225.6:36-75	ENST00000226225.6	36	75	84	12	4	6.87627
ENST00000226225.6:47-53	ENST00000226225.6	47	53	4	83	5	-7.07658
ENST00000226225.6:49-97	ENST00000226225.6	49	97	11	2	1	3.80735
ENST00000226225.6:6-75	ENST00000226225.6	6	75	84	12	4	6.87627
ENST00000226225.6:62-167	ENST00000226225.6	62	167	0	3	24	-5.2854
ENST00000226225.6:68-167	ENST00000226225.6	68	167	0	2	23	-5.32048
ENST00000226225.6:71-167	ENST00000226225.6	71	167	0	2	21	-5.17167
ENST00000226225.6:86-167	ENST00000226225.6	86	167	0	2	21	-5.17167
ENST00000226522.8:4-55	ENST00000226522.8	4	55	1	1	6	-2.85798
ENST00000226796.6:100-148	ENST00000226796.6	100	148	3	1	1	1.37851
ENST00000226796.6:40-61	ENST00000226796.6	40	61	2	1	2	0.485427
ENST00000226796.6:64-100	ENST00000226796.6	64	100	16	5	0	4.3322
ENST00000226796.6:69-171	ENST00000226796.6	69	171	1	20	4	-4.70266
ENST00000226796.6:78-171	ENST00000226796.6	78	171	1	20	4	-4.70266
ENST00000226796.6:81-171	ENST00000226796.6	81	171	1	20	4	-4.70266
ENST00000226796.6:96-171	ENST00000226796.6	96	171	1	4	1	-2
ENST00000226798.8:70-103	ENST00000226798.8	70	103	0	1	1	-1
ENST00000226798.8:76-103	ENST00000226798.8	76	103	0	1	1	-1
ENST00000226798.8:97-103	ENST00000226798.8	97	103	0	1	1	-1
ENST00000227507.2:21-90	ENST00000227507.2	21	90	0	0	3	-2.80735
ENST00000227507.2:39-90	ENST00000227507.2	39	90	0	0	3	-2.80735
ENST00000227507.2:42-90	ENST00000227507.2	42	90	0	0	3	-2.80735
ENST00000227507.2:48-90	ENST00000227507.2	48	90	0	0	3	-2.80735
ENST00000227520.9:18-51	ENST00000227520.9	18	51	3	1	0	2.16993
ENST00000227520.9:30-51	ENST00000227520.9	30	51	3	1	0	2.16993
ENST00000227524.8:175-199	ENST00000227524.8	175	199	9	4	1	3
ENST00000227524.8:25-58	ENST00000227524.8	25	58	16	3	3	4.03242
ENST00000227524.8:38-71	ENST00000227524.8	38	71	2	3	10	-3.10434
ENST00000227524.8:52-58	ENST00000227524.8	52	58	4	1	2	1.58496
ENST00000227524.8:64-199	ENST00000227524.8	64	199	148	12	12	7.75535
ENST00000227525.7:146-215	ENST00000227525.7	146	215	6	6	1	2.27684
ENST00000227525.7:149-215	ENST00000227525.7	149	215	6	6	1	2.27684
ENST00000227525.7:178-259	ENST00000227525.7	178	259	0	7	4	-2.94996
ENST00000227525.7:184-259	ENST00000227525.7	184	259	0	7	4	-2.94996
ENST00000227525.7:188-215	ENST00000227525.7	188	215	4	3	0	2.23704
ENST00000227525.7:190-259	ENST00000227525.7	190	259	0	6	3	-2.80735
ENST00000227525.7:206-215	ENST00000227525.7	206	215	3	2	0	1.926
ENST00000227525.7:229-259	ENST00000227525.7	229	259	0	3	0	-2.80735
ENST00000227525.7:26-215	ENST00000227525.7	26	215	7	9	1	-2.8314
ENST00000227525.7:292-313	ENST00000227525.7	292	313	5	10	2	-2.75803
ENST00000227525.7:298-313	ENST00000227525.7	298	313	5	10	0	-3.45943
ENST00000227525.7:327-372	ENST00000227525.7	327	372	8	6	5	0.796467
ENST00000227525.7:340-379	ENST00000227525.7	340	379	8	7	8	0.120294
ENST00000227525.7:343-379	ENST00000227525.7	343	379	8	7	8	0.120294
ENST00000227525.7:366-372	ENST00000227525.7	366	372	8	6	1	2.63227
ENST00000227525.7:381-390	ENST00000227525.7	381	390	4	89	0	-7.35784
ENST00000227638.7:105-219	ENST00000227638.7	105	219	1	2	3	-1
ENST00000227638.7:118-337	ENST00000227638.7	118	337	3	17	6	-3.75899
ENST00000227638.7:126-219	ENST00000227638.7	126	219	1	2	3	-1
ENST00000227638.7:144-219	ENST00000227638.7	144	219	0	2	0	-2.32193
ENST00000227638.7:237-276	ENST00000227638.7	237	276	1	0	5	-3
ENST00000227638.7:247-337	ENST00000227638.7	247	337	0	11	0	-4.52356
ENST00000227638.7:27-219	ENST00000227638.7	27	219	1	4	4	-1.58496
ENST00000227638.7:292-337	ENST00000227638.7	292	337	0	5	0	-3.45943
ENST00000227638.7:31-337	ENST00000227638.7	31	337	5	18	6	-3.56408
ENST00000227638.7:63-219	ENST00000227638.7	63	219	1	3	4	-1.45943
ENST00000227638.7:72-219	ENST00000227638.7	72	219	1	3	4	-1.45943
ENST00000227638.7:99-219	ENST00000227638.7	99	219	1	2	4	-1.58496
ENST00000228136.8:121-310	ENST00000228136.8	121	310	5	5	1	1.96683
ENST00000228136.8:142-310	ENST00000228136.8	142	310	5	5	1	1.96683
ENST00000228136.8:229-310	ENST00000228136.8	229	310	5	5	0	2.58496
ENST00000228136.8:232-310	ENST00000228136.8	232	310	5	5	0	2.58496
ENST00000228136.8:235-310	ENST00000228136.8	235	310	4	5	0	-2.5025
ENST00000228136.8:241-310	ENST00000228136.8	241	310	2	0	0	2.32193
ENST00000228347.8:103-217	ENST00000228347.8	103	217	1	1	5	-2.47805
ENST00000228347.8:163-217	ENST00000228347.8	163	217	1	1	2	-0.584963
ENST00000228425.10:119-140	ENST00000228425.10	119	140	4	1	2	1.58496
ENST00000228425.10:121-157	ENST00000228425.10	121	157	5	5	1	1.96683
ENST00000228425.10:123-165	ENST00000228425.10	123	165	2	7	3	-2.16993
ENST00000228425.10:133-157	ENST00000228425.10	133	157	3	3	0	2
ENST00000228425.10:136-157	ENST00000228425.10	136	157	3	3	0	2
ENST00000228425.10:153-165	ENST00000228425.10	153	165	1	4	0	-2.63227
ENST00000228425.10:17-86	ENST00000228425.10	17	86	0	3	0	-2.80735
ENST00000228425.10:183-222	ENST00000228425.10	183	222	0	5	3	-2.52356
ENST00000228425.10:205-229	ENST00000228425.10	205	229	4	5	0	-2.5025
ENST00000228425.10:45-165	ENST00000228425.10	45	165	5	7	6	-0.415037
ENST00000228425.10:5-86	ENST00000228425.10	5	86	0	3	0	-2.80735
ENST00000228425.10:62-86	ENST00000228425.10	62	86	0	3	0	-2.80735
ENST00000228425.10:76-115	ENST00000228425.10	76	115	0	1	2	-1.58496
ENST00000228437.9:103-379	ENST00000228437.9	103	379	3	9	18	-3.63227
ENST00000228437.9:120-156	ENST00000228437.9	120	156	3	2	3	0.321928
ENST00000228437.9:144-156	ENST00000228437.9	144	156	3	2	3	0.321928
ENST00000228437.9:152-365	ENST00000228437.9	152	365	9	18	1	-4.04439
ENST00000228437.9:16-379	ENST00000228437.9	16	379	3	9	18	-3.63227
ENST00000228437.9:167-365	ENST00000228437.9	167	365	5	15	1	-3.98706
ENST00000228437.9:197-365	ENST00000228437.9	197	365	5	14	1	-3.83794
ENST00000228437.9:205-379	ENST00000228437.9	205	379	1	5	14	-3.83794
ENST00000228437.9:230-365	ENST00000228437.9	230	365	5	13	1	-3.67688
ENST00000228437.9:248-365	ENST00000228437.9	248	365	2	5	0	-2.6845
ENST00000228437.9:260-365	ENST00000228437.9	260	365	0	5	0	-3.45943
ENST00000228437.9:272-365	ENST00000228437.9	272	365	0	5	0	-3.45943
ENST00000228437.9:280-379	ENST00000228437.9	280	379	0	0	5	-3.45943
ENST00000228437.9:284-365	ENST00000228437.9	284	365	0	5	0	-3.45943
ENST00000228437.9:73-379	ENST00000228437.9	73	379	3	9	18	-3.63227
ENST00000228438.2:494-593	ENST00000228438.2	494	593	0	2	0	-2.32193
ENST00000228438.2:504-531	ENST00000228438.2	504	531	2	0	0	2.32193
ENST00000228438.2:506-593	ENST00000228438.2	506	593	0	2	0	-2.32193
ENST00000228438.2:523-580	ENST00000228438.2	523	580	0	0	2	-2.32193
ENST00000228438.2:527-593	ENST00000228438.2	527	593	0	2	0	-2.32193
ENST00000228438.2:796-922	ENST00000228438.2	796	922	39	41	38	-0.161751
ENST00000228438.2:802-922	ENST00000228438.2	802	922	39	38	35	0.30117
ENST00000228438.2:804-813	ENST00000228438.2	804	813	3	34	4	-5.53651
ENST00000228438.2:807-813	ENST00000228438.2	807	813	3	33	1	-5.73086
ENST00000228438.2:859-922	ENST00000228438.2	859	922	5	26	32	-4.3322
ENST00000228438.2:872-899	ENST00000228438.2	872	899	16	32	2	-4.80941
ENST00000228438.2:881-899	ENST00000228438.2	881	899	11	32	1	-5.13489
ENST00000228438.2:892-922	ENST00000228438.2	892	922	1	11	26	-4.70044
ENST00000228506.7:284-359	ENST00000228506.7	284	359	4	18	0	-4.66469
ENST00000228506.7:311-359	ENST00000228506.7	311	359	2	18	0	-4.91648
ENST00000228506.7:341-359	ENST00000228506.7	341	359	2	4	0	-2.32193
ENST00000228506.7:347-359	ENST00000228506.7	347	359	0	3	0	-2.80735
ENST00000228515.5:17-233	ENST00000228515.5	17	233	1	2	2	-0.485427
ENST00000228515.5:198-243	ENST00000228515.5	198	243	2	2	1	0.485427
ENST00000228515.5:219-243	ENST00000228515.5	219	243	2	2	1	0.485427
ENST00000228515.5:225-243	ENST00000228515.5	225	243	2	2	0	1.58496
ENST00000228515.5:35-233	ENST00000228515.5	35	233	1	2	2	-0.485427
ENST00000228515.5:47-233	ENST00000228515.5	47	233	1	2	2	-0.485427
ENST00000228515.5:8-233	ENST00000228515.5	8	233	1	2	2	-0.485427
ENST00000228515.5:80-233	ENST00000228515.5	80	233	1	2	2	-0.485427
ENST00000228740.6:107-113	ENST00000228740.6	107	113	0	84	3	-7.30031
ENST00000228740.6:124-130	ENST00000228740.6	124	130	2	2	0	1.58496
ENST00000228740.6:20-95	ENST00000228740.6	20	95	4	3	0	2.23704
ENST00000228740.6:82-130	ENST00000228740.6	82	130	5	6	89	-7.13402
ENST00000228740.6:88-130	ENST00000228740.6	88	130	5	6	87	-7.09351
ENST00000228740.6:95-113	ENST00000228740.6	95	113	0	84	3	-7.30031
ENST00000228865.2:25-157	ENST00000228865.2	25	157	9	0	2	3.72048
ENST00000228865.2:30-108	ENST00000228865.2	30	108	1	9	0	-3.96347
ENST00000228865.2:71-227	ENST00000228865.2	71	227	0	3	4	-2.23704
ENST00000228865.2:95-227	ENST00000228865.2	95	227	0	3	4	-2.23704
ENST00000228872.8:197-287	ENST00000228872.8	197	287	0	10	0	-4.39232
ENST00000228872.8:230-287	ENST00000228872.8	230	287	0	9	0	-4.24793
ENST00000228872.8:275-287	ENST00000228872.8	275	287	0	8	0	-4.08746
ENST00000228872.8:311-644	ENST00000228872.8	311	644	58	36	12	4.95244
ENST00000228872.8:330-678	ENST00000228872.8	330	678	36	13	58	-4.87738
ENST00000228872.8:340-502	ENST00000228872.8	340	502	8	56	8	-6.02237
ENST00000228872.8:346-502	ENST00000228872.8	346	502	8	56	8	-6.02237
ENST00000228872.8:352-502	ENST00000228872.8	352	502	8	52	7	-5.91012
ENST00000228872.8:363-678	ENST00000228872.8	363	678	35	13	49	-4.41759
ENST00000228872.8:376-502	ENST00000228872.8	376	502	8	47	7	-5.68243
ENST00000228872.8:387-678	ENST00000228872.8	387	678	35	13	49	-4.41759
ENST00000228872.8:410-644	ENST00000228872.8	410	644	49	35	12	4.51175
ENST00000228872.8:430-502	ENST00000228872.8	430	502	8	42	7	-5.41918
ENST00000228872.8:437-644	ENST00000228872.8	437	644	44	35	12	4.24459
ENST00000228872.8:453-678	ENST00000228872.8	453	678	35	13	44	-4.13643
ENST00000228872.8:457-502	ENST00000228872.8	457	502	8	42	7	-5.41918
ENST00000228872.8:498-678	ENST00000228872.8	498	678	35	11	2	5.224
ENST00000228872.8:545-644	ENST00000228872.8	545	644	2	25	4	-5.01878
ENST00000228872.8:569-644	ENST00000228872.8	569	644	2	25	3	-5.12102
ENST00000228872.8:584-644	ENST00000228872.8	584	644	2	16	3	-4.20387
ENST00000228872.8:593-644	ENST00000228872.8	593	644	2	16	2	-4.36457
ENST00000228872.8:612-678	ENST00000228872.8	612	678	16	1	0	4.87543
ENST00000228918.8:140-212	ENST00000228918.8	140	212	2	1	2	0.485427
ENST00000228918.8:152-212	ENST00000228918.8	152	212	2	1	2	0.485427
ENST00000228918.8:161-212	ENST00000228918.8	161	212	2	1	2	0.485427
ENST00000228918.8:44-212	ENST00000228918.8	44	212	2	1	2	0.485427
ENST00000228918.8:62-212	ENST00000228918.8	62	212	2	1	2	0.485427
ENST00000228918.8:68-212	ENST00000228918.8	68	212	2	1	2	0.485427
ENST00000228918.8:83-212	ENST00000228918.8	83	212	2	1	2	0.485427
ENST00000229251.7:1-37	ENST00000229251.7	1	37	0	5	4	-2.5025
ENST00000229265.10:15-87	ENST00000229265.10	15	87	0	7	7	-3
ENST00000229265.10:21-87	ENST00000229265.10	21	87	0	6	7	-2.92892
ENST00000229390.7:108-132	ENST00000229390.7	108	132	3	2	0	1.926
ENST00000229390.7:111-132	ENST00000229390.7	111	132	3	2	0	1.926
ENST00000229390.7:31-88	ENST00000229390.7	31	88	2	121	8	-7.69242
ENST00000229390.7:73-88	ENST00000229390.7	73	88	2	121	8	-7.69242
ENST00000229390.7:78-132	ENST00000229390.7	78	132	3	2	67	-6.86522
ENST00000229390.7:84-132	ENST00000229390.7	84	132	3	2	0	1.926
ENST00000229416.10:157-412	ENST00000229416.10	157	412	1	3	0	-2.16993
ENST00000229416.10:47-98	ENST00000229416.10	47	98	1	7	0	-3.55459
ENST00000229416.10:56-98	ENST00000229416.10	56	98	1	7	0	-3.55459
ENST00000229416.10:62-98	ENST00000229416.10	62	98	1	6	0	-3.30117
ENST00000229416.10:7-412	ENST00000229416.10	7	412	2	4	7	-1.97199
ENST00000229563.5:100-262	ENST00000229563.5	100	262	5	5	0	2.58496
ENST00000229563.5:123-243	ENST00000229563.5	123	243	0	5	5	-2.58496
ENST00000229563.5:172-262	ENST00000229563.5	172	262	1	5	0	-3
ENST00000229563.5:189-243	ENST00000229563.5	189	243	0	1	4	-2.63227
ENST00000229563.5:227-284	ENST00000229563.5	227	284	9	44	28	-4.56929
ENST00000229563.5:275-284	ENST00000229563.5	275	284	9	42	13	-4.97298
ENST00000229563.5:42-243	ENST00000229563.5	42	243	0	5	5	-2.58496
ENST00000229563.5:63-243	ENST00000229563.5	63	243	0	5	5	-2.58496
ENST00000229595.5:22-43	ENST00000229595.5	22	43	5	5	0	2.58496
ENST00000229595.5:29-47	ENST00000229595.5	29	47	5	0	6	-2.73039
ENST00000229595.5:37-43	ENST00000229595.5	37	43	4	5	0	-2.5025
ENST00000229633.6:113-155	ENST00000229633.6	113	155	1	34	8	-5.43249
ENST00000229633.6:122-155	ENST00000229633.6	122	155	1	34	8	-5.43249
ENST00000229633.6:26-155	ENST00000229633.6	26	155	2	34	16	-4.93981
ENST00000229633.6:7-112	ENST00000229633.6	7	112	8	1	0	3.77259
ENST00000229633.6:98-155	ENST00000229633.6	98	155	1	34	8	-5.43249
ENST00000229634.13:1-103	ENST00000229634.13	1	103	7	3	1	2.60666
ENST00000229634.13:107-119	ENST00000229634.13	107	119	0	0	2	-2.32193
ENST00000229634.13:45-123	ENST00000229634.13	45	123	1	9	2	-3.39232
ENST00000229634.13:49-103	ENST00000229634.13	49	103	3	0	1	2.16993
ENST00000229769.2:42-135	ENST00000229769.2	42	135	3	2	0	1.926
ENST00000229769.2:5-62	ENST00000229769.2	5	62	0	3	2	-1.926
ENST00000229769.2:56-62	ENST00000229769.2	56	62	0	3	2	-1.926
ENST00000229794.8:101-107	ENST00000229794.8	101	107	0	18	0	-5.20945
ENST00000229794.8:14-107	ENST00000229794.8	14	107	0	18	0	-5.20945
ENST00000229794.8:17-107	ENST00000229794.8	17	107	0	18	0	-5.20945
ENST00000229794.8:63-147	ENST00000229794.8	63	147	19	0	1	5.1416
ENST00000229794.8:68-107	ENST00000229794.8	68	107	0	18	0	-5.20945
ENST00000229794.8:77-107	ENST00000229794.8	77	107	0	18	0	-5.20945
ENST00000230048.4:7-124	ENST00000230048.4	7	124	0	1	2	-1.58496
ENST00000230056.7:104-179	ENST00000230056.7	104	179	1	36	1	-6.03284
ENST00000230056.7:140-179	ENST00000230056.7	140	179	1	36	1	-6.03284
ENST00000230056.7:158-179	ENST00000230056.7	158	179	1	36	1	-6.03284
ENST00000230056.7:179-236	ENST00000230056.7	179	236	4	6	0	-2.72247
ENST00000230056.7:200-236	ENST00000230056.7	200	236	4	4	0	2.32193
ENST00000230056.7:206-236	ENST00000230056.7	206	236	3	4	0	-2.23704
ENST00000230056.7:53-179	ENST00000230056.7	53	179	1	36	1	-6.03284
ENST00000230056.7:83-179	ENST00000230056.7	83	179	1	36	1	-6.03284
ENST00000230340.8:108-216	ENST00000230340.8	108	216	3	10	0	-3.71741
ENST00000230340.8:144-216	ENST00000230340.8	144	216	0	2	0	-2.32193
ENST00000230340.8:15-216	ENST00000230340.8	15	216	3	10	5	-2.41504
ENST00000230340.8:18-216	ENST00000230340.8	18	216	3	10	5	-2.41504
ENST00000230340.8:27-216	ENST00000230340.8	27	216	3	10	5	-2.41504
ENST00000230340.8:37-112	ENST00000230340.8	37	112	5	5	3	0.691878
ENST00000230340.8:81-216	ENST00000230340.8	81	216	3	10	5	-2.41504
ENST00000230340.8:85-112	ENST00000230340.8	85	112	5	5	3	0.691878
ENST00000230354.10:100-130	ENST00000230354.10	100	130	12	5	1	3.5025
ENST00000230354.10:105-111	ENST00000230354.10	105	111	1	8	0	-3.77259
ENST00000230354.10:107-167	ENST00000230354.10	107	167	13	64	11	-5.96631
ENST00000230354.10:12-111	ENST00000230354.10	12	111	2	15	0	-4.6095
ENST00000230354.10:126-231	ENST00000230354.10	126	231	65	24	9	5.71284
ENST00000230354.10:135-231	ENST00000230354.10	135	231	65	21	9	5.80491
ENST00000230354.10:138-231	ENST00000230354.10	138	231	65	21	9	5.80491
ENST00000230354.10:147-231	ENST00000230354.10	147	231	65	18	9	5.90637
ENST00000230354.10:149-167	ENST00000230354.10	149	167	8	62	5	-6.38059
ENST00000230354.10:152-167	ENST00000230354.10	152	167	8	62	5	-6.38059
ENST00000230354.10:158-167	ENST00000230354.10	158	167	7	49	3	-6.06682
ENST00000230354.10:174-231	ENST00000230354.10	174	231	2	11	1	-3.80735
ENST00000230354.10:186-231	ENST00000230354.10	186	231	0	9	1	-3.96347
ENST00000230354.10:213-231	ENST00000230354.10	213	231	0	3	0	-2.80735
ENST00000230354.10:23-65	ENST00000230354.10	23	65	0	1	6	-3.30117
ENST00000230354.10:35-65	ENST00000230354.10	35	65	0	1	6	-3.30117
ENST00000230354.10:54-111	ENST00000230354.10	54	111	2	15	0	-4.6095
ENST00000230354.10:64-130	ENST00000230354.10	64	130	12	5	1	3.5025
ENST00000230354.10:76-130	ENST00000230354.10	76	130	12	5	1	3.5025
ENST00000230354.10:93-111	ENST00000230354.10	93	111	1	9	0	-3.96347
ENST00000230449.8:0-72	ENST00000230449.8	0	72	2	1	0	1.58496
ENST00000230449.8:15-72	ENST00000230449.8	15	72	2	1	0	1.58496
ENST00000230449.8:73-106	ENST00000230449.8	73	106	0	1	11	-4.2854
ENST00000230640.9:12-177	ENST00000230640.9	12	177	4	7	4	-1.1375
ENST00000230640.9:134-224	ENST00000230640.9	134	224	2	8	7	-2.21632
ENST00000230640.9:153-177	ENST00000230640.9	153	177	4	5	1	-1.848
ENST00000230640.9:170-224	ENST00000230640.9	170	224	2	8	6	-2.16993
ENST00000230640.9:173-224	ENST00000230640.9	173	224	2	7	1	-2.848
ENST00000230640.9:24-177	ENST00000230640.9	24	177	4	7	4	-1.1375
ENST00000230771.7:27-165	ENST00000230771.7	27	165	0	5	2	-2.6845
ENST00000230771.7:36-165	ENST00000230771.7	36	165	0	5	2	-2.6845
ENST00000230771.7:78-165	ENST00000230771.7	78	165	0	4	2	-2.32193
ENST00000230771.7:90-165	ENST00000230771.7	90	165	0	4	2	-2.32193
ENST00000230859.7:215-518	ENST00000230859.7	215	518	5	0	5	2.58496
ENST00000230859.7:218-518	ENST00000230859.7	218	518	5	0	5	2.58496
ENST00000230859.7:245-518	ENST00000230859.7	245	518	5	0	5	2.58496
ENST00000230859.7:275-518	ENST00000230859.7	275	518	5	0	5	2.58496
ENST00000230859.7:284-518	ENST00000230859.7	284	518	5	0	5	2.58496
ENST00000230859.7:299-518	ENST00000230859.7	299	518	5	0	5	2.58496
ENST00000230859.7:315-525	ENST00000230859.7	315	525	0	9	5	-3.28011
ENST00000230859.7:330-525	ENST00000230859.7	330	525	0	9	5	-3.28011
ENST00000230859.7:360-525	ENST00000230859.7	360	525	0	9	5	-3.28011
ENST00000230859.7:397-514	ENST00000230859.7	397	514	5	4	0	2.5025
ENST00000230859.7:406-514	ENST00000230859.7	406	514	5	4	0	2.5025
ENST00000230859.7:436-514	ENST00000230859.7	436	514	5	4	0	2.5025
ENST00000230859.7:451-514	ENST00000230859.7	451	514	5	4	0	2.5025
ENST00000230859.7:510-525	ENST00000230859.7	510	525	0	7	1	-3.55459
ENST00000230895.10:39-132	ENST00000230895.10	39	132	0	1	1	-1
ENST00000230895.10:45-132	ENST00000230895.10	45	132	0	1	1	-1
ENST00000230895.10:9-132	ENST00000230895.10	9	132	0	1	1	-1
ENST00000231238.9:20-77	ENST00000231238.9	20	77	24	1	2	5.26887
ENST00000231238.9:71-77	ENST00000231238.9	71	77	23	1	2	5.19438
ENST00000231498.7:55-115	ENST00000231498.7	55	115	1	7	2	-2.848
ENST00000231498.7:73-115	ENST00000231498.7	73	115	1	4	2	-1.58496
ENST00000232125.9:108-138	ENST00000232125.9	108	138	0	1	1	-1
ENST00000232125.9:114-138	ENST00000232125.9	114	138	0	1	1	-1
ENST00000232125.9:12-81	ENST00000232125.9	12	81	3	5	1	-1.87447
ENST00000232125.9:125-158	ENST00000232125.9	125	158	1	1	0	1
ENST00000232125.9:134-158	ENST00000232125.9	134	158	1	1	0	1
ENST00000232125.9:15-81	ENST00000232125.9	15	81	3	5	1	-1.87447
ENST00000232125.9:19-148	ENST00000232125.9	19	148	49	3	9	5.96597
ENST00000232125.9:25-148	ENST00000232125.9	25	148	49	3	9	5.96597
ENST00000232125.9:60-81	ENST00000232125.9	60	81	3	5	1	-1.87447
ENST00000232125.9:65-158	ENST00000232125.9	65	158	3	9	49	-5.96597
ENST00000232125.9:84-138	ENST00000232125.9	84	138	5	44	2	-6.03537
ENST00000232125.9:90-138	ENST00000232125.9	90	138	5	44	2	-6.03537
ENST00000232165.7:448-589	ENST00000232165.7	448	589	0	3	2	-1.926
ENST00000232165.7:520-589	ENST00000232165.7	520	589	0	3	2	-1.926
ENST00000232496.4:1-85	ENST00000232496.4	1	85	5	1	0	3
ENST00000232496.4:12-102	ENST00000232496.4	12	102	1	30	1	-5.74315
ENST00000232496.4:28-85	ENST00000232496.4	28	85	5	1	0	3
ENST00000232496.4:66-102	ENST00000232496.4	66	102	1	30	0	-5.83778
ENST00000232496.4:78-102	ENST00000232496.4	78	102	1	29	0	-5.7866
ENST00000232496.4:84-102	ENST00000232496.4	84	102	1	29	0	-5.7866
ENST00000232496.4:96-102	ENST00000232496.4	96	102	1	23	0	-5.43463
ENST00000232508.9:120-162	ENST00000232508.9	120	162	1	5	0	-3
ENST00000232508.9:125-155	ENST00000232508.9	125	155	0	0	2	-2.32193
ENST00000232508.9:151-220	ENST00000232508.9	151	220	4	1	3	1.45943
ENST00000232508.9:181-220	ENST00000232508.9	181	220	0	1	2	-1.58496
ENST00000232508.9:19-220	ENST00000232508.9	19	220	6	1	3	2.26303
ENST00000232508.9:196-220	ENST00000232508.9	196	220	0	1	2	-1.58496
ENST00000232508.9:47-155	ENST00000232508.9	47	155	0	0	2	-2.32193
ENST00000232508.9:50-155	ENST00000232508.9	50	155	0	0	2	-2.32193
ENST00000232508.9:61-220	ENST00000232508.9	61	220	6	1	3	2.26303
ENST00000232508.9:96-162	ENST00000232508.9	96	162	1	5	0	-3
ENST00000232564.7:106-262	ENST00000232564.7	106	262	0	1	3	-2.16993
ENST00000232564.7:114-234	ENST00000232564.7	114	234	3	0	1	2.16993
ENST00000232564.7:118-262	ENST00000232564.7	118	262	0	1	3	-2.16993
ENST00000232564.7:120-234	ENST00000232564.7	120	234	3	0	1	2.16993
ENST00000232564.7:133-262	ENST00000232564.7	133	262	0	1	3	-2.16993
ENST00000232564.7:145-262	ENST00000232564.7	145	262	0	1	3	-2.16993
ENST00000232564.7:150-234	ENST00000232564.7	150	234	3	0	1	2.16993
ENST00000232564.7:184-262	ENST00000232564.7	184	262	0	1	3	-2.16993
ENST00000232564.7:187-262	ENST00000232564.7	187	262	0	1	3	-2.16993
ENST00000232564.7:222-234	ENST00000232564.7	222	234	3	0	1	2.16993
ENST00000232564.7:230-269	ENST00000232564.7	230	269	1	3	0	-2.16993
ENST00000232564.7:33-234	ENST00000232564.7	33	234	3	0	1	2.16993
ENST00000232564.7:7-262	ENST00000232564.7	7	262	0	1	3	-2.16993
ENST00000232564.7:96-234	ENST00000232564.7	96	234	3	0	1	2.16993
ENST00000232564.7:99-234	ENST00000232564.7	99	234	3	0	1	2.16993
ENST00000232905.3:191-203	ENST00000232905.3	191	203	2	18	3	-4.45658
ENST00000233072.9:159-165	ENST00000233072.9	159	165	0	6	1	-3.30117
ENST00000233072.9:20-125	ENST00000233072.9	20	125	1	8	1	-3.43296
ENST00000233072.9:26-125	ENST00000233072.9	26	125	1	8	1	-3.43296
ENST00000233072.9:47-125	ENST00000233072.9	47	125	1	8	1	-3.43296
ENST00000233072.9:51-87	ENST00000233072.9	51	87	6	0	0	3.70044
ENST00000233072.9:71-125	ENST00000233072.9	71	125	1	2	1	-0.584963
ENST00000233072.9:90-129	ENST00000233072.9	90	129	2	1	2	0.485427
ENST00000233072.9:94-154	ENST00000233072.9	94	154	4	9	3	-2.2854
ENST00000233078.8:50-98	ENST00000233078.8	50	98	55	2	11	6.16934
ENST00000233078.8:71-98	ENST00000233078.8	71	98	54	0	11	6.25114
ENST00000233084.7:197-311	ENST00000233084.7	197	311	2	2	0	1.58496
ENST00000233084.7:212-311	ENST00000233084.7	212	311	2	2	0	1.58496
ENST00000233084.7:248-311	ENST00000233084.7	248	311	2	2	0	1.58496
ENST00000233143.5:36-105	ENST00000233143.5	36	105	308	593	263	-7.37571
ENST00000233143.5:39-105	ENST00000233143.5	39	105	308	593	263	-7.37571
ENST00000233143.5:81-105	ENST00000233143.5	81	105	104	543	167	-8.70153
ENST00000233143.5:87-105	ENST00000233143.5	87	105	99	519	163	-8.62345
ENST00000233143.5:96-105	ENST00000233143.5	96	105	73	447	50	-9.03296
ENST00000233468.4:115-136	ENST00000233468.4	115	136	23	106	7	-6.97273
ENST00000233468.4:118-136	ENST00000233468.4	118	136	22	102	7	-6.91248
ENST00000233468.4:121-136	ENST00000233468.4	121	136	21	102	7	-6.93546
ENST00000233468.4:140-146	ENST00000233468.4	140	146	5	18	0	-4.55592
ENST00000233468.4:184-196	ENST00000233468.4	184	196	34	5	4	5.37544
ENST00000233468.4:52-136	ENST00000233468.4	52	136	38	106	10	-6.58438
ENST00000233575.6:117-147	ENST00000233575.6	117	147	22	121	7	-7.27128
ENST00000233575.6:124-217	ENST00000233575.6	124	217	40	4	1	5.99548
ENST00000233575.6:130-217	ENST00000233575.6	130	217	18	3	1	4.61738
ENST00000233575.6:21-147	ENST00000233575.6	21	147	23	121	11	-7.14929
ENST00000233575.6:47-128	ENST00000233575.6	47	128	8	22	103	-6.90282
ENST00000233575.6:59-128	ENST00000233575.6	59	128	8	21	103	-6.92589
ENST00000233575.6:75-147	ENST00000233575.6	75	147	22	121	11	-7.16993
ENST00000233615.6:102-156	ENST00000233615.6	102	156	3	29	4	-5.21594
ENST00000233615.6:113-266	ENST00000233615.6	113	266	4	17	32	-4.53769
ENST00000233615.6:116-266	ENST00000233615.6	116	266	4	17	32	-4.53769
ENST00000233615.6:132-156	ENST00000233615.6	132	156	3	29	2	-5.40439
ENST00000233615.6:152-266	ENST00000233615.6	152	266	0	14	3	-4.3346
ENST00000233615.6:155-266	ENST00000233615.6	155	266	0	14	3	-4.3346
ENST00000233615.6:158-266	ENST00000233615.6	158	266	0	14	3	-4.3346
ENST00000233615.6:173-266	ENST00000233615.6	173	266	0	9	2	-3.72048
ENST00000233615.6:191-266	ENST00000233615.6	191	266	0	8	2	-3.51096
ENST00000233615.6:197-266	ENST00000233615.6	197	266	0	7	2	-3.27302
ENST00000233615.6:209-266	ENST00000233615.6	209	266	0	6	2	-3
ENST00000233615.6:227-266	ENST00000233615.6	227	266	0	4	1	-2.63227
ENST00000233615.6:245-266	ENST00000233615.6	245	266	0	4	1	-2.63227
ENST00000233615.6:84-156	ENST00000233615.6	84	156	4	29	4	-5.12034
ENST00000233893.9:16-157	ENST00000233893.9	16	157	12	3	4	3.11839
ENST00000233893.9:93-183	ENST00000233893.9	93	183	0	12	3	-4.05311
ENST00000234111.8:1-154	ENST00000234111.8	1	154	2	43	1	-6.24628
ENST00000234111.8:100-154	ENST00000234111.8	100	154	2	43	1	-6.24628
ENST00000234111.8:109-154	ENST00000234111.8	109	154	1	42	1	-6.27443
ENST00000234111.8:114-150	ENST00000234111.8	114	150	1	0	42	-6.34233
ENST00000234111.8:117-150	ENST00000234111.8	117	150	1	0	42	-6.34233
ENST00000234111.8:127-154	ENST00000234111.8	127	154	1	42	1	-6.27443
ENST00000234111.8:141-150	ENST00000234111.8	141	150	0	0	2	-2.32193
ENST00000234111.8:162-450	ENST00000234111.8	162	450	352	13	10	9.27469
ENST00000234111.8:175-283	ENST00000234111.8	175	283	0	0	2	-2.32193
ENST00000234111.8:221-383	ENST00000234111.8	221	383	8	349	12	-9.28527
ENST00000234111.8:279-450	ENST00000234111.8	279	450	349	12	10	9.26886
ENST00000234111.8:282-450	ENST00000234111.8	282	450	349	12	10	9.26886
ENST00000234111.8:311-383	ENST00000234111.8	311	383	8	348	12	-9.28067
ENST00000234111.8:317-383	ENST00000234111.8	317	383	8	344	12	-9.26212
ENST00000234111.8:338-383	ENST00000234111.8	338	383	8	341	11	-9.25633
ENST00000234111.8:350-383	ENST00000234111.8	350	383	8	340	10	-9.25995
ENST00000234111.8:356-383	ENST00000234111.8	356	383	2	22	5	-4.64783
ENST00000234111.8:361-496	ENST00000234111.8	361	496	5	4	23	-4.48784
ENST00000234111.8:370-496	ENST00000234111.8	370	496	5	3	16	-3.72792
ENST00000234111.8:379-496	ENST00000234111.8	379	496	2	2	1	0.485427
ENST00000234111.8:385-496	ENST00000234111.8	385	496	0	2	1	-1.58496
ENST00000234111.8:391-496	ENST00000234111.8	391	496	0	2	1	-1.58496
ENST00000234111.8:79-154	ENST00000234111.8	79	154	2	43	1	-6.24628
ENST00000234160.4:262-748	ENST00000234160.4	262	748	5	1	5	1.96683
ENST00000234160.4:352-748	ENST00000234160.4	352	748	5	1	5	1.96683
ENST00000234160.4:355-748	ENST00000234160.4	355	748	5	1	5	1.96683
ENST00000234160.4:367-748	ENST00000234160.4	367	748	5	1	5	1.96683
ENST00000234160.4:412-748	ENST00000234160.4	412	748	5	1	5	1.96683
ENST00000234160.4:424-748	ENST00000234160.4	424	748	5	1	5	1.96683
ENST00000234160.4:448-748	ENST00000234160.4	448	748	5	1	5	1.96683
ENST00000234160.4:454-748	ENST00000234160.4	454	748	5	1	5	1.96683
ENST00000234160.4:625-748	ENST00000234160.4	625	748	5	1	5	1.96683
ENST00000234160.4:631-748	ENST00000234160.4	631	748	5	1	5	1.96683
ENST00000234160.4:658-748	ENST00000234160.4	658	748	5	1	5	1.96683
ENST00000234160.4:685-748	ENST00000234160.4	685	748	5	1	5	1.96683
ENST00000234160.4:715-748	ENST00000234160.4	715	748	5	1	5	1.96683
ENST00000234179.6:105-243	ENST00000234179.6	105	243	1	13	1	-4.33628
ENST00000234179.6:131-224	ENST00000234179.6	131	224	1	0	9	-3.96347
ENST00000234179.6:159-243	ENST00000234179.6	159	243	1	13	0	-4.5502
ENST00000234179.6:18-51	ENST00000234179.6	18	51	0	7	2	-3.27302
ENST00000234179.6:186-243	ENST00000234179.6	186	243	1	11	0	-4.2854
ENST00000234179.6:195-243	ENST00000234179.6	195	243	1	11	0	-4.2854
ENST00000234179.6:24-51	ENST00000234179.6	24	51	0	7	1	-3.55459
ENST00000234179.6:281-341	ENST00000234179.6	281	341	0	5	0	-3.45943
ENST00000234179.6:284-341	ENST00000234179.6	284	341	0	5	0	-3.45943
ENST00000234179.6:306-507	ENST00000234179.6	306	507	4	1	1	2
ENST00000234179.6:310-391	ENST00000234179.6	310	391	0	0	4	-3.16993
ENST00000234296.6:0-189	ENST00000234296.6	0	189	24	34	7	-4.18587
ENST00000234296.6:153-189	ENST00000234296.6	153	189	12	33	1	-5.14886
ENST00000234296.6:156-189	ENST00000234296.6	156	189	12	33	1	-5.14886
ENST00000234296.6:177-189	ENST00000234296.6	177	189	0	22	0	-5.49185
ENST00000234296.6:195-237	ENST00000234296.6	195	237	16	0	2	4.71882
ENST00000234296.6:201-237	ENST00000234296.6	201	237	7	0	2	3.27302
ENST00000234296.6:208-229	ENST00000234296.6	208	229	0	2	5	-2.6845
ENST00000234296.6:214-229	ENST00000234296.6	214	229	0	2	4	-2.32193
ENST00000234296.6:39-189	ENST00000234296.6	39	189	23	34	7	-4.19229
ENST00000234296.6:57-189	ENST00000234296.6	57	189	22	34	7	-4.20387
ENST00000234296.6:7-157	ENST00000234296.6	7	157	1	6	12	-3.40312
ENST00000234296.6:75-189	ENST00000234296.6	75	189	19	34	7	-4.27053
ENST00000234296.6:82-157	ENST00000234296.6	82	157	1	6	7	-2.44057
ENST00000234310.7:10-190	ENST00000234310.7	10	190	0	35	8	-5.58286
ENST00000234310.7:127-190	ENST00000234310.7	127	190	0	7	6	-2.92892
ENST00000234310.7:136-190	ENST00000234310.7	136	190	0	3	6	-2.80735
ENST00000234310.7:149-350	ENST00000234310.7	149	350	12	8	1	3.30117
ENST00000234310.7:173-350	ENST00000234310.7	173	350	11	7	1	3.16993
ENST00000234310.7:206-350	ENST00000234310.7	206	350	9	2	1	3.39232
ENST00000234310.7:30-39	ENST00000234310.7	30	39	2	0	0	2.32193
ENST00000234310.7:35-350	ENST00000234310.7	35	350	44	10	1	5.83565
ENST00000234310.7:4-190	ENST00000234310.7	4	190	0	35	8	-5.58286
ENST00000234310.7:46-190	ENST00000234310.7	46	190	0	35	6	-5.70786
ENST00000234310.7:69-177	ENST00000234310.7	69	177	6	0	7	-2.92892
ENST00000234590.8:9-90	ENST00000234590.8	9	90	532	26	78	9.51551
ENST00000234590.8:93-111	ENST00000234590.8	93	111	46	477	361	-8.40346
ENST00000234626.10:0-90	ENST00000234626.10	0	90	0	1	1	-1
ENST00000234626.10:6-90	ENST00000234626.10	6	90	0	1	1	-1
ENST00000234626.10:72-90	ENST00000234626.10	72	90	0	1	1	-1
ENST00000234677.6:19-52	ENST00000234677.6	19	52	1	8	5	-2.65208
ENST00000234677.6:40-52	ENST00000234677.6	40	52	1	6	0	-3.30117
ENST00000234739.7:136-235	ENST00000234739.7	136	235	0	3	0	-2.80735
ENST00000234739.7:139-235	ENST00000234739.7	139	235	0	3	0	-2.80735
ENST00000234739.7:142-235	ENST00000234739.7	142	235	0	3	0	-2.80735
ENST00000234739.7:155-230	ENST00000234739.7	155	230	3	0	0	2.80735
ENST00000234739.7:316-415	ENST00000234739.7	316	415	10	0	1	4.13303
ENST00000234739.7:320-395	ENST00000234739.7	320	395	0	1	10	-4.13303
ENST00000234739.7:324-369	ENST00000234739.7	324	369	1	10	0	-4.13303
ENST00000234739.7:340-415	ENST00000234739.7	340	415	10	0	1	4.13303
ENST00000234739.7:355-415	ENST00000234739.7	355	415	10	0	1	4.13303
ENST00000234739.7:363-369	ENST00000234739.7	363	369	1	10	0	-4.13303
ENST00000234739.7:446-467	ENST00000234739.7	446	467	0	6	0	-3.70044
ENST00000234739.7:453-717	ENST00000234739.7	453	717	8	0	1	3.77259
ENST00000235090.9:12-180	ENST00000235090.9	12	180	13	0	3	4.19967
ENST00000235090.9:27-180	ENST00000235090.9	27	180	13	0	2	4.36457
ENST00000235090.9:9-180	ENST00000235090.9	9	180	13	0	3	4.19967
ENST00000235329.9:114-171	ENST00000235329.9	114	171	1	12	0	-4.42368
ENST00000235329.9:135-171	ENST00000235329.9	135	171	1	12	0	-4.42368
ENST00000235329.9:141-171	ENST00000235329.9	141	171	1	12	0	-4.42368
ENST00000235329.9:144-171	ENST00000235329.9	144	171	1	12	0	-4.42368
ENST00000235329.9:167-296	ENST00000235329.9	167	296	0	7	4	-2.94996
ENST00000235329.9:179-296	ENST00000235329.9	179	296	0	7	4	-2.94996
ENST00000235329.9:18-171	ENST00000235329.9	18	171	1	12	0	-4.42368
ENST00000235329.9:182-296	ENST00000235329.9	182	296	0	7	4	-2.94996
ENST00000235329.9:219-282	ENST00000235329.9	219	282	3	4	0	-2.23704
ENST00000235329.9:252-282	ENST00000235329.9	252	282	3	1	0	2.16993
ENST00000235329.9:272-296	ENST00000235329.9	272	296	0	7	0	-3.90689
ENST00000235329.9:278-296	ENST00000235329.9	278	296	0	7	0	-3.90689
ENST00000235329.9:281-296	ENST00000235329.9	281	296	0	6	0	-3.70044
ENST00000235329.9:60-171	ENST00000235329.9	60	171	1	12	0	-4.42368
ENST00000235329.9:69-171	ENST00000235329.9	69	171	1	12	0	-4.42368
ENST00000235329.9:72-171	ENST00000235329.9	72	171	1	12	0	-4.42368
ENST00000235329.9:75-171	ENST00000235329.9	75	171	1	12	0	-4.42368
ENST00000235332.5:102-147	ENST00000235332.5	102	147	1	1	1	0
ENST00000235332.5:115-157	ENST00000235332.5	115	157	1	1	1	0
ENST00000235332.5:28-91	ENST00000235332.5	28	91	0	2	0	-2.32193
ENST00000235332.5:33-147	ENST00000235332.5	33	147	1	1	3	-1.37851
ENST00000235332.5:57-147	ENST00000235332.5	57	147	1	1	2	-0.584963
ENST00000235332.5:96-147	ENST00000235332.5	96	147	1	1	1	0
ENST00000236051.2:113-119	ENST00000236051.2	113	119	0	58	8	-6.50491
ENST00000236051.2:13-46	ENST00000236051.2	13	46	2	8	8	-2.32193
ENST00000236051.2:23-38	ENST00000236051.2	23	38	1	2	0	-1.58496
ENST00000236051.2:28-46	ENST00000236051.2	28	46	0	2	0	-2.32193
ENST00000236051.2:8-38	ENST00000236051.2	8	38	7	8	2	-2.21632
ENST00000236051.2:86-119	ENST00000236051.2	86	119	2	94	16	-7.0514
ENST00000236067.8:108-168	ENST00000236067.8	108	168	0	11	2	-4.07435
ENST00000236067.8:129-168	ENST00000236067.8	129	168	0	11	2	-4.07435
ENST00000236067.8:15-168	ENST00000236067.8	15	168	0	11	2	-4.07435
ENST00000236067.8:150-168	ENST00000236067.8	150	168	0	10	2	-3.90689
ENST00000236067.8:156-168	ENST00000236067.8	156	168	0	10	2	-3.90689
ENST00000236067.8:33-168	ENST00000236067.8	33	168	0	11	2	-4.07435
ENST00000236067.8:36-168	ENST00000236067.8	36	168	0	11	2	-4.07435
ENST00000236067.8:93-168	ENST00000236067.8	93	168	0	11	2	-4.07435
ENST00000236067.8:96-168	ENST00000236067.8	96	168	0	11	2	-4.07435
ENST00000237500.9:104-335	ENST00000237500.9	104	335	8	10	56	-5.92561
ENST00000237500.9:155-335	ENST00000237500.9	155	335	8	10	56	-5.92561
ENST00000237500.9:176-335	ENST00000237500.9	176	335	8	10	56	-5.92561
ENST00000237500.9:188-335	ENST00000237500.9	188	335	8	10	56	-5.92561
ENST00000237500.9:200-335	ENST00000237500.9	200	335	8	10	56	-5.92561
ENST00000237500.9:233-335	ENST00000237500.9	233	335	8	10	56	-5.92561
ENST00000237500.9:248-335	ENST00000237500.9	248	335	8	10	56	-5.92561
ENST00000237500.9:266-335	ENST00000237500.9	266	335	8	10	56	-5.92561
ENST00000237500.9:65-335	ENST00000237500.9	65	335	8	10	56	-5.92561
ENST00000237530.10:102-108	ENST00000237530.10	102	108	1	16	1	-4.70044
ENST00000237530.10:104-176	ENST00000237530.10	104	176	1	1	0	1
ENST00000237530.10:29-176	ENST00000237530.10	29	176	1	1	20	-5.07973
ENST00000237530.10:36-108	ENST00000237530.10	36	108	1	20	1	-5.07973
ENST00000237530.10:50-176	ENST00000237530.10	50	176	1	1	17	-4.80464
ENST00000237530.10:56-176	ENST00000237530.10	56	176	1	1	17	-4.80464
ENST00000237530.10:79-187	ENST00000237530.10	79	187	16	1	1	4.70044
ENST00000237530.10:92-176	ENST00000237530.10	92	176	1	1	16	-4.70044
ENST00000237536.8:208-325	ENST00000237536.8	208	325	5	11	0	-3.62936
ENST00000237536.8:307-325	ENST00000237536.8	307	325	1	10	0	-4.13303
ENST00000237536.8:40-325	ENST00000237536.8	40	325	5	11	0	-3.62936
ENST00000237654.8:221-296	ENST00000237654.8	221	296	25	1	2	5.33985
ENST00000237654.8:286-304	ENST00000237654.8	286	304	0	46	3	-6.35935
ENST00000237654.8:44-296	ENST00000237654.8	44	296	66	3	9	6.55459
ENST00000237654.8:481-538	ENST00000237654.8	481	538	3	0	0	2.80735
ENST00000237654.8:496-538	ENST00000237654.8	496	538	2	0	0	2.32193
ENST00000237654.8:58-304	ENST00000237654.8	58	304	9	101	6	-7.24645
ENST00000237853.8:144-309	ENST00000237853.8	144	309	5	4	2	1.18442
ENST00000237853.8:225-309	ENST00000237853.8	225	309	5	4	2	1.18442
ENST00000237853.8:233-257	ENST00000237853.8	233	257	2	5	0	-2.6845
ENST00000237889.8:20-170	ENST00000237889.8	20	170	0	2	1	-1.58496
ENST00000237889.8:24-120	ENST00000237889.8	24	120	1	1	0	1
ENST00000237889.8:29-170	ENST00000237889.8	29	170	0	2	1	-1.58496
ENST00000237889.8:3-120	ENST00000237889.8	3	120	1	1	0	1
ENST00000238081.7:66-72	ENST00000238081.7	66	72	2	11	1	-3.80735
ENST00000238112.7:10-85	ENST00000238112.7	10	85	0	1	2	-1.58496
ENST00000238112.7:106-154	ENST00000238112.7	106	154	5	36	0	-5.82422
ENST00000238112.7:133-154	ENST00000238112.7	133	154	5	23	0	-5.01601
ENST00000238112.7:139-154	ENST00000238112.7	139	154	4	23	0	-5.11085
ENST00000238112.7:64-85	ENST00000238112.7	64	85	0	1	2	-1.58496
ENST00000238112.7:7-85	ENST00000238112.7	7	85	0	1	2	-1.58496
ENST00000238112.7:91-106	ENST00000238112.7	91	106	1	1	1	0
ENST00000238647.4:102-150	ENST00000238647.4	102	150	3	5	4	-0.584963
ENST00000238647.4:135-150	ENST00000238647.4	135	150	0	3	2	-1.926
ENST00000238647.4:144-150	ENST00000238647.4	144	150	0	3	2	-1.926
ENST00000238647.4:146-692	ENST00000238647.4	146	692	9	2	1	3.39232
ENST00000238647.4:187-415	ENST00000238647.4	187	415	0	5	0	-3.45943
ENST00000238647.4:204-468	ENST00000238647.4	204	468	0	1	5	-3
ENST00000238647.4:208-415	ENST00000238647.4	208	415	0	5	0	-3.45943
ENST00000238647.4:212-692	ENST00000238647.4	212	692	7	2	1	2.848
ENST00000238647.4:227-692	ENST00000238647.4	227	692	6	2	1	2.5025
ENST00000238647.4:235-415	ENST00000238647.4	235	415	0	4	0	-3.16993
ENST00000238647.4:242-692	ENST00000238647.4	242	692	6	2	1	2.5025
ENST00000238647.4:251-692	ENST00000238647.4	251	692	6	2	1	2.5025
ENST00000238647.4:275-692	ENST00000238647.4	275	692	6	2	1	2.5025
ENST00000238647.4:30-54	ENST00000238647.4	30	54	0	1	7	-3.55459
ENST00000238647.4:301-415	ENST00000238647.4	301	415	0	4	0	-3.16993
ENST00000238647.4:308-692	ENST00000238647.4	308	692	5	2	1	2.08746
ENST00000238647.4:311-692	ENST00000238647.4	311	692	5	2	1	2.08746
ENST00000238647.4:339-468	ENST00000238647.4	339	468	0	1	3	-2.16993
ENST00000238647.4:388-415	ENST00000238647.4	388	415	0	3	0	-2.80735
ENST00000238647.4:43-49	ENST00000238647.4	43	49	1	5	0	-3
ENST00000238647.4:455-692	ENST00000238647.4	455	692	2	2	1	0.485427
ENST00000238647.4:512-692	ENST00000238647.4	512	692	2	2	0	1.58496
ENST00000238647.4:548-692	ENST00000238647.4	548	692	2	2	0	1.58496
ENST00000238647.4:649-667	ENST00000238647.4	649	667	0	1	1	-1
ENST00000238647.4:82-415	ENST00000238647.4	82	415	6	13	3	-3.03242
ENST00000238647.4:88-415	ENST00000238647.4	88	415	5	10	3	-2.41504
ENST00000238651.9:101-131	ENST00000238651.9	101	131	2	3	1	-1
ENST00000238651.9:34-97	ENST00000238651.9	34	97	0	5	1	-3
ENST00000238651.9:74-131	ENST00000238651.9	74	131	2	4	1	-1.58496
ENST00000238651.9:89-131	ENST00000238651.9	89	131	2	3	1	-1
ENST00000238823.12:11-128	ENST00000238823.12	11	128	0	3	0	-2.80735
ENST00000238823.12:41-128	ENST00000238823.12	41	128	0	3	0	-2.80735
ENST00000238823.12:47-128	ENST00000238823.12	47	128	0	3	0	-2.80735
ENST00000238892.3:62-68	ENST00000238892.3	62	68	0	3	2	-1.926
ENST00000238892.3:67-112	ENST00000238892.3	67	112	24	3	0	5.2854
ENST00000238892.3:70-112	ENST00000238892.3	70	112	24	3	0	5.2854
ENST00000238892.3:73-112	ENST00000238892.3	73	112	24	3	0	5.2854
ENST00000239165.8:18-57	ENST00000239165.8	18	57	0	2	6	-3
ENST00000239165.8:31-37	ENST00000239165.8	31	37	0	6	0	-3.70044
ENST00000239223.3:16-91	ENST00000239223.3	16	91	5	7	3	-1.37851
ENST00000239223.3:22-91	ENST00000239223.3	22	91	5	0	2	2.6845
ENST00000239231.6:15-207	ENST00000239231.6	15	207	0	2	1	-1.58496
ENST00000239906.9:100-319	ENST00000239906.9	100	319	1	7	21	-4.51053
ENST00000239906.9:122-356	ENST00000239906.9	122	356	11	90	4	-7.03719
ENST00000239906.9:131-356	ENST00000239906.9	131	356	11	90	4	-7.03719
ENST00000239906.9:142-319	ENST00000239906.9	142	319	1	7	21	-4.51053
ENST00000239906.9:155-356	ENST00000239906.9	155	356	11	90	4	-7.03719
ENST00000239906.9:214-319	ENST00000239906.9	214	319	1	7	21	-4.51053
ENST00000239906.9:238-319	ENST00000239906.9	238	319	1	7	21	-4.51053
ENST00000239906.9:255-291	ENST00000239906.9	255	291	19	0	4	4.76415
ENST00000239906.9:262-319	ENST00000239906.9	262	319	1	7	21	-4.51053
ENST00000239906.9:287-356	ENST00000239906.9	287	356	8	89	4	-7.1049
ENST00000239906.9:320-356	ENST00000239906.9	320	356	4	69	3	-6.83189
ENST00000239906.9:323-356	ENST00000239906.9	323	356	4	68	3	-6.80684
ENST00000239906.9:326-356	ENST00000239906.9	326	356	4	68	3	-6.80684
ENST00000239906.9:341-356	ENST00000239906.9	341	356	3	40	2	-5.98944
ENST00000239906.9:73-319	ENST00000239906.9	73	319	1	7	21	-4.51053
ENST00000239906.9:89-356	ENST00000239906.9	89	356	11	90	4	-7.03719
ENST00000240100.6:155-305	ENST00000240100.6	155	305	1	25	130	-7.5081
ENST00000240100.6:170-305	ENST00000240100.6	170	305	1	25	130	-7.5081
ENST00000240100.6:198-204	ENST00000240100.6	198	204	14	130	1	-7.7124
ENST00000240100.6:200-305	ENST00000240100.6	200	305	1	12	0	-4.42368
ENST00000240100.6:212-305	ENST00000240100.6	212	305	0	7	0	-3.90689
ENST00000240100.6:260-305	ENST00000240100.6	260	305	0	3	0	-2.80735
ENST00000240100.6:273-333	ENST00000240100.6	273	333	3	0	0	2.80735
ENST00000240100.6:285-333	ENST00000240100.6	285	333	3	0	0	2.80735
ENST00000240100.6:33-120	ENST00000240100.6	33	120	4	31	0	-5.63642
ENST00000240100.6:42-120	ENST00000240100.6	42	120	0	25	0	-5.67243
ENST00000240285.9:101-272	ENST00000240285.9	101	272	21	18	9	2.55459
ENST00000240285.9:111-210	ENST00000240285.9	111	210	10	9	12	-0.537657
ENST00000240285.9:122-272	ENST00000240285.9	122	272	21	15	9	2.53605
ENST00000240285.9:126-210	ENST00000240285.9	126	210	10	9	11	-0.263034
ENST00000240285.9:14-272	ENST00000240285.9	14	272	21	52	20	-4.48252
ENST00000240285.9:196-328	ENST00000240285.9	196	328	144	36	15	7.2135
ENST00000240285.9:206-272	ENST00000240285.9	206	272	17	13	0	4.07039
ENST00000240285.9:229-328	ENST00000240285.9	229	328	138	23	4	7.58619
ENST00000240285.9:236-272	ENST00000240285.9	236	272	6	1	0	3.30117
ENST00000240285.9:248-272	ENST00000240285.9	248	272	6	1	0	3.30117
ENST00000240285.9:25-328	ENST00000240285.9	25	328	158	38	54	6.68493
ENST00000240285.9:268-328	ENST00000240285.9	268	328	138	17	2	7.73807
ENST00000240285.9:30-54	ENST00000240285.9	30	54	32	11	0	5.24351
ENST00000240285.9:318-348	ENST00000240285.9	318	348	2	158	17	-7.97777
ENST00000240285.9:324-348	ENST00000240285.9	324	348	2	157	8	-8.11903
ENST00000240285.9:355-589	ENST00000240285.9	355	589	5	6	4	-0.485427
ENST00000240285.9:367-589	ENST00000240285.9	367	589	5	6	4	-0.485427
ENST00000240285.9:393-441	ENST00000240285.9	393	441	2	1	3	-1
ENST00000240285.9:400-589	ENST00000240285.9	400	589	5	6	2	-1.58496
ENST00000240285.9:412-589	ENST00000240285.9	412	589	4	3	2	0.736966
ENST00000240285.9:42-54	ENST00000240285.9	42	54	32	11	0	5.24351
ENST00000240285.9:490-589	ENST00000240285.9	490	589	4	2	0	2.32193
ENST00000240285.9:50-272	ENST00000240285.9	50	272	21	51	10	-5.08539
ENST00000240285.9:583-589	ENST00000240285.9	583	589	4	2	0	2.32193
ENST00000240285.9:66-210	ENST00000240285.9	66	210	14	9	12	1.06054
ENST00000240285.9:81-210	ENST00000240285.9	81	210	14	9	12	1.06054
ENST00000240285.9:9-54	ENST00000240285.9	9	54	32	11	0	5.24351
ENST00000240304.5:13-40	ENST00000240304.5	13	40	1	0	1	1
ENST00000241393.3:19-64	ENST00000241393.3	19	64	2	10	0	-3.90689
ENST00000241393.3:22-64	ENST00000241393.3	22	64	2	10	0	-3.90689
ENST00000241393.3:46-64	ENST00000241393.3	46	64	2	10	0	-3.90689
ENST00000241393.3:49-64	ENST00000241393.3	49	64	2	7	0	-3.27302
ENST00000241704.7:115-205	ENST00000241704.7	115	205	13	0	0	4.75489
ENST00000241704.7:154-205	ENST00000241704.7	154	205	13	0	0	4.75489
ENST00000241704.7:157-205	ENST00000241704.7	157	205	13	0	0	4.75489
ENST00000241704.7:85-205	ENST00000241704.7	85	205	13	0	0	4.75489
ENST00000242057.8:104-110	ENST00000242057.8	104	110	0	29	0	-5.88264
ENST00000242057.8:114-186	ENST00000242057.8	114	186	4	1	16	-4.24793
ENST00000242057.8:121-292	ENST00000242057.8	121	292	2	26	13	-4.46741
ENST00000242057.8:137-266	ENST00000242057.8	137	266	6	11	1	-3.22239
ENST00000242057.8:140-266	ENST00000242057.8	140	266	6	11	1	-3.22239
ENST00000242057.8:176-266	ENST00000242057.8	176	266	5	11	1	-3.31342
ENST00000242057.8:238-292	ENST00000242057.8	238	292	1	7	9	-2.8314
ENST00000242057.8:244-292	ENST00000242057.8	244	292	1	7	9	-2.8314
ENST00000242057.8:262-292	ENST00000242057.8	262	292	1	6	0	-3.30117
ENST00000242057.8:292-484	ENST00000242057.8	292	484	21	2	24	-4.26079
ENST00000242057.8:31-292	ENST00000242057.8	31	292	3	28	42	-5.04798
ENST00000242057.8:328-484	ENST00000242057.8	328	484	21	2	24	-4.26079
ENST00000242057.8:337-484	ENST00000242057.8	337	484	21	2	24	-4.26079
ENST00000242057.8:35-110	ENST00000242057.8	35	110	2	29	1	-5.59432
ENST00000242057.8:357-363	ENST00000242057.8	357	363	0	5	0	-3.45943
ENST00000242057.8:363-471	ENST00000242057.8	363	471	23	2	1	5.19438
ENST00000242057.8:370-484	ENST00000242057.8	370	484	2	2	23	-5.07325
ENST00000242057.8:414-471	ENST00000242057.8	414	471	23	2	1	5.19438
ENST00000242057.8:438-471	ENST00000242057.8	438	471	23	2	1	5.19438
ENST00000242057.8:480-621	ENST00000242057.8	480	621	4	0	3	2.23704
ENST00000242057.8:51-186	ENST00000242057.8	51	186	33	2	17	4.84452
ENST00000242057.8:56-110	ENST00000242057.8	56	110	1	29	1	-5.68876
ENST00000242057.8:69-186	ENST00000242057.8	69	186	33	2	17	4.84452
ENST00000242057.8:9-186	ENST00000242057.8	9	186	33	2	18	4.81801
ENST00000242209.8:2-65	ENST00000242209.8	2	65	1	1	0	1
ENST00000242209.8:38-65	ENST00000242209.8	38	65	1	1	0	1
ENST00000242209.8:8-65	ENST00000242209.8	8	65	1	1	0	1
ENST00000242275.6:121-193	ENST00000242275.6	121	193	0	12	1	-4.42368
ENST00000242275.6:131-209	ENST00000242275.6	131	209	11	1	0	4.2854
ENST00000242275.6:15-63	ENST00000242275.6	15	63	1	0	1	1
ENST00000242275.6:159-225	ENST00000242275.6	159	225	1	0	9	-3.96347
ENST00000242275.6:179-209	ENST00000242275.6	179	209	8	1	0	3.77259
ENST00000242275.6:43-88	ENST00000242275.6	43	88	0	1	1	-1
ENST00000242275.6:50-119	ENST00000242275.6	50	119	2	7	0	-3.27302
ENST00000242275.6:59-119	ENST00000242275.6	59	119	2	7	0	-3.27302
ENST00000242275.6:62-119	ENST00000242275.6	62	119	2	7	0	-3.27302
ENST00000242275.6:84-108	ENST00000242275.6	84	108	2	0	1	1.58496
ENST00000242275.6:9-63	ENST00000242275.6	9	63	1	0	1	1
ENST00000242719.3:102-327	ENST00000242719.3	102	327	2	3	0	-1.926
ENST00000242719.3:23-161	ENST00000242719.3	23	161	6	6	0	2.80735
ENST00000242719.3:41-161	ENST00000242719.3	41	161	6	6	0	2.80735
ENST00000242719.3:56-161	ENST00000242719.3	56	161	6	6	0	2.80735
ENST00000242719.3:71-161	ENST00000242719.3	71	161	0	3	0	-2.80735
ENST00000242827.10:9-48	ENST00000242827.10	9	48	2	1	11	-3.80735
ENST00000242848.8:102-123	ENST00000242848.8	102	123	0	2	0	-2.32193
ENST00000243045.9:64-136	ENST00000243045.9	64	136	1	2	2	-0.485427
ENST00000243346.9:158-185	ENST00000243346.9	158	185	0	5	0	-3.45943
ENST00000243346.9:170-185	ENST00000243346.9	170	185	0	5	0	-3.45943
ENST00000243563.7:121-505	ENST00000243563.7	121	505	27	9	9	3.94486
ENST00000243563.7:125-188	ENST00000243563.7	125	188	3	4	10	-2.59904
ENST00000243563.7:142-505	ENST00000243563.7	142	505	27	9	8	4.05232
ENST00000243563.7:152-188	ENST00000243563.7	152	188	3	3	8	-2.19265
ENST00000243563.7:162-282	ENST00000243563.7	162	282	4	23	6	-4.37977
ENST00000243563.7:165-282	ENST00000243563.7	165	282	4	19	6	-3.88011
ENST00000243563.7:180-282	ENST00000243563.7	180	282	1	15	5	-3.98706
ENST00000243563.7:19-505	ENST00000243563.7	19	505	37	10	11	4.65772
ENST00000243563.7:191-308	ENST00000243563.7	191	308	5	4	15	-3.35755
ENST00000243563.7:209-308	ENST00000243563.7	209	308	5	4	15	-3.35755
ENST00000243563.7:240-282	ENST00000243563.7	240	282	1	15	3	-4.2559
ENST00000243563.7:252-282	ENST00000243563.7	252	282	1	15	3	-4.2559
ENST00000243563.7:256-505	ENST00000243563.7	256	505	17	4	5	3.70895
ENST00000243563.7:264-282	ENST00000243563.7	264	282	1	15	3	-4.2559
ENST00000243563.7:283-505	ENST00000243563.7	283	505	2	1	4	-1.58496
ENST00000243563.7:52-505	ENST00000243563.7	52	505	37	10	11	4.65772
ENST00000243563.7:63-156	ENST00000243563.7	63	156	3	12	3	-3.32193
ENST00000243563.7:69-156	ENST00000243563.7	69	156	3	11	3	-3.09245
ENST00000243563.7:89-188	ENST00000243563.7	89	188	4	5	12	-2.6845
ENST00000243563.7:95-188	ENST00000243563.7	95	188	4	4	12	-2.88753
ENST00000243786.2:111-177	ENST00000243786.2	111	177	4	0	0	3.16993
ENST00000243786.2:23-152	ENST00000243786.2	23	152	0	5	1	-3
ENST00000243786.2:32-152	ENST00000243786.2	32	152	0	5	0	-3.45943
ENST00000243786.2:56-152	ENST00000243786.2	56	152	0	5	0	-3.45943
ENST00000243786.2:75-177	ENST00000243786.2	75	177	5	0	0	3.45943
ENST00000243786.2:81-177	ENST00000243786.2	81	177	5	0	0	3.45943
ENST00000243786.2:86-152	ENST00000243786.2	86	152	0	5	0	-3.45943
ENST00000243918.9:10-244	ENST00000243918.9	10	244	0	5	3	-2.52356
ENST00000243918.9:202-244	ENST00000243918.9	202	244	0	5	1	-3
ENST00000243918.9:208-244	ENST00000243918.9	208	244	0	2	1	-1.58496
ENST00000243918.9:34-244	ENST00000243918.9	34	244	0	5	3	-2.52356
ENST00000243918.9:40-244	ENST00000243918.9	40	244	0	5	3	-2.52356
ENST00000243918.9:76-244	ENST00000243918.9	76	244	0	5	3	-2.52356
ENST00000244040.3:144-246	ENST00000244040.3	144	246	0	3	1	-2.16993
ENST00000244040.3:183-246	ENST00000244040.3	183	246	0	3	1	-2.16993
ENST00000244040.3:207-246	ENST00000244040.3	207	246	0	3	1	-2.16993
ENST00000244040.3:21-246	ENST00000244040.3	21	246	0	3	4	-2.23704
ENST00000244040.3:213-246	ENST00000244040.3	213	246	0	3	1	-2.16993
ENST00000244040.3:216-246	ENST00000244040.3	216	246	0	3	1	-2.16993
ENST00000244040.3:222-246	ENST00000244040.3	222	246	0	3	1	-2.16993
ENST00000244040.3:24-246	ENST00000244040.3	24	246	0	3	4	-2.23704
ENST00000244040.3:87-246	ENST00000244040.3	87	246	0	3	1	-2.16993
ENST00000244230.6:101-152	ENST00000244230.6	101	152	4	0	0	3.16993
ENST00000244230.6:115-136	ENST00000244230.6	115	136	0	4	0	-3.16993
ENST00000244230.6:122-152	ENST00000244230.6	122	152	4	0	0	3.16993
ENST00000244230.6:132-216	ENST00000244230.6	132	216	1	0	2	-1.58496
ENST00000244230.6:148-259	ENST00000244230.6	148	259	0	3	1	-2.16993
ENST00000244230.6:154-259	ENST00000244230.6	154	259	0	3	1	-2.16993
ENST00000244230.6:164-347	ENST00000244230.6	164	347	1	9	1	-3.65951
ENST00000244230.6:179-347	ENST00000244230.6	179	347	1	9	1	-3.65951
ENST00000244230.6:212-347	ENST00000244230.6	212	347	1	8	1	-3.43296
ENST00000244230.6:233-347	ENST00000244230.6	233	347	1	8	1	-3.43296
ENST00000244230.6:24-72	ENST00000244230.6	24	72	0	4	0	-3.16993
ENST00000244230.6:272-347	ENST00000244230.6	272	347	0	8	1	-3.77259
ENST00000244230.6:284-347	ENST00000244230.6	284	347	0	8	1	-3.77259
ENST00000244230.6:320-347	ENST00000244230.6	320	347	0	8	1	-3.77259
ENST00000244230.6:323-347	ENST00000244230.6	323	347	0	8	0	-4.08746
ENST00000244230.6:66-72	ENST00000244230.6	66	72	0	3	0	-2.80735
ENST00000244230.6:79-136	ENST00000244230.6	79	136	0	4	0	-3.16993
ENST00000244230.6:91-136	ENST00000244230.6	91	136	0	4	0	-3.16993
ENST00000244520.9:104-110	ENST00000244520.9	104	110	3	1	0	2.16993
ENST00000244520.9:80-110	ENST00000244520.9	80	110	4	1	0	2.63227
ENST00000244745.3:1006-1213	ENST00000244745.3	1006	1213	11	1	1	4.03427
ENST00000244745.3:1012-1213	ENST00000244745.3	1012	1213	10	1	1	3.85798
ENST00000244745.3:1027-1213	ENST00000244745.3	1027	1213	10	1	1	3.85798
ENST00000244745.3:1057-1213	ENST00000244745.3	1057	1213	10	1	1	3.85798
ENST00000244745.3:1072-1213	ENST00000244745.3	1072	1213	10	1	1	3.85798
ENST00000244745.3:1077-1290	ENST00000244745.3	1077	1290	1	61	3	-6.75756
ENST00000244745.3:1089-1290	ENST00000244745.3	1089	1290	0	54	3	-6.61393
ENST00000244745.3:1110-1290	ENST00000244745.3	1110	1290	0	54	2	-6.66432
ENST00000244745.3:1143-1290	ENST00000244745.3	1143	1290	0	53	2	-6.6357
ENST00000244745.3:1151-1196	ENST00000244745.3	1151	1196	0	0	2	-2.32193
ENST00000244745.3:1154-1196	ENST00000244745.3	1154	1196	0	0	2	-2.32193
ENST00000244745.3:1158-1290	ENST00000244745.3	1158	1290	0	53	2	-6.6357
ENST00000244745.3:1169-1196	ENST00000244745.3	1169	1196	0	0	2	-2.32193
ENST00000244745.3:1182-1290	ENST00000244745.3	1182	1290	0	51	2	-6.57672
ENST00000244745.3:1196-1271	ENST00000244745.3	1196	1271	2	0	13	-4.36457
ENST00000244745.3:1212-1290	ENST00000244745.3	1212	1290	0	51	2	-6.57672
ENST00000244745.3:1237-1330	ENST00000244745.3	1237	1330	46	9	9	5.45224
ENST00000244745.3:1255-1330	ENST00000244745.3	1255	1330	44	7	9	5.46923
ENST00000244745.3:1260-1290	ENST00000244745.3	1260	1290	0	40	0	-6.33985
ENST00000244745.3:1283-1310	ENST00000244745.3	1283	1310	0	9	37	-5.63126
ENST00000244745.3:1295-1310	ENST00000244745.3	1295	1310	0	9	2	-3.72048
ENST00000244745.3:1306-1330	ENST00000244745.3	1306	1330	1	7	0	-3.55459
ENST00000244745.3:1331-1499	ENST00000244745.3	1331	1499	5	1	5	1.96683
ENST00000244745.3:1400-1499	ENST00000244745.3	1400	1499	5	1	5	1.96683
ENST00000244745.3:1485-1737	ENST00000244745.3	1485	1737	3	6	6	-1.1375
ENST00000244745.3:833-1016	ENST00000244745.3	833	1016	1	0	1	1
ENST00000244745.3:872-1016	ENST00000244745.3	872	1016	1	0	1	1
ENST00000244745.3:899-1016	ENST00000244745.3	899	1016	1	0	1	1
ENST00000244745.3:923-1016	ENST00000244745.3	923	1016	1	0	1	1
ENST00000244745.3:974-1016	ENST00000244745.3	974	1016	1	0	1	1
ENST00000244745.3:991-1213	ENST00000244745.3	991	1213	11	2	1	3.80735
ENST00000245185.5:364-439	ENST00000245185.5	364	439	5	0	0	3.45943
ENST00000245185.5:376-439	ENST00000245185.5	376	439	5	0	0	3.45943
ENST00000245185.5:388-439	ENST00000245185.5	388	439	5	0	0	3.45943
ENST00000245544.8:16-52	ENST00000245544.8	16	52	7	1	4	2.45943
ENST00000245615.5:213-345	ENST00000245615.5	213	345	2	9	2	-3.09398
ENST00000245615.5:318-345	ENST00000245615.5	318	345	0	9	0	-4.24793
ENST00000245615.5:324-345	ENST00000245615.5	324	345	0	9	0	-4.24793
ENST00000245615.5:33-345	ENST00000245615.5	33	345	2	9	2	-3.09398
ENST00000245615.5:66-345	ENST00000245615.5	66	345	2	9	2	-3.09398
ENST00000245680.6:211-349	ENST00000245680.6	211	349	40	2	4	5.92249
ENST00000245680.6:312-360	ENST00000245680.6	312	360	5	73	3	-6.89032
ENST00000245680.6:333-360	ENST00000245680.6	333	360	4	71	1	-6.96183
ENST00000245680.6:345-360	ENST00000245680.6	345	360	3	47	1	-6.33144
ENST00000245680.6:354-360	ENST00000245680.6	354	360	1	33	1	-5.89516
ENST00000245903.3:23-35	ENST00000245903.3	23	35	2	0	1	1.58496
ENST00000245903.3:31-130	ENST00000245903.3	31	130	1	3	0	-2.16993
ENST00000245932.10:103-169	ENST00000245932.10	103	169	1	4	10	-3.23266
ENST00000245932.10:110-290	ENST00000245932.10	110	290	34	24	4	4.55953
ENST00000245932.10:121-169	ENST00000245932.10	121	169	1	4	8	-2.7425
ENST00000245932.10:124-169	ENST00000245932.10	124	169	1	4	8	-2.7425
ENST00000245932.10:13-52	ENST00000245932.10	13	52	31	188	7	-8.00885
ENST00000245932.10:137-290	ENST00000245932.10	137	290	34	22	4	4.57289
ENST00000245932.10:140-290	ENST00000245932.10	140	290	34	22	4	4.57289
ENST00000245932.10:15-87	ENST00000245932.10	15	87	7	32	189	-8.00636
ENST00000245932.10:19-52	ENST00000245932.10	19	52	31	188	7	-8.00885
ENST00000245932.10:232-259	ENST00000245932.10	232	259	3	26	9	-4.55297
ENST00000245932.10:245-290	ENST00000245932.10	245	290	11	7	0	3.5025
ENST00000245932.10:28-52	ENST00000245932.10	28	52	31	188	7	-8.00885
ENST00000245932.10:36-87	ENST00000245932.10	36	87	7	32	189	-8.00636
ENST00000245932.10:41-290	ENST00000245932.10	41	290	223	31	36	7.95876
ENST00000245932.10:46-52	ENST00000245932.10	46	52	31	188	6	-8.0254
ENST00000245934.11:110-200	ENST00000245934.11	110	200	0	4	0	-3.16993
ENST00000245934.11:114-237	ENST00000245934.11	114	237	4	0	0	3.16993
ENST00000245934.11:116-200	ENST00000245934.11	116	200	0	4	0	-3.16993
ENST00000245934.11:125-200	ENST00000245934.11	125	200	0	4	0	-3.16993
ENST00000245934.11:144-237	ENST00000245934.11	144	237	4	0	0	3.16993
ENST00000245934.11:155-200	ENST00000245934.11	155	200	0	4	0	-3.16993
ENST00000245934.11:27-237	ENST00000245934.11	27	237	4	0	0	3.16993
ENST00000245934.11:42-237	ENST00000245934.11	42	237	4	0	0	3.16993
ENST00000245934.11:53-200	ENST00000245934.11	53	200	0	4	0	-3.16993
ENST00000245934.11:65-200	ENST00000245934.11	65	200	0	4	0	-3.16993
ENST00000245934.11:80-200	ENST00000245934.11	80	200	0	4	0	-3.16993
ENST00000245934.11:87-237	ENST00000245934.11	87	237	4	0	0	3.16993
ENST00000246151.8:15-48	ENST00000246151.8	15	48	7	16	3	-3.48938
ENST00000246151.8:24-48	ENST00000246151.8	24	48	7	16	3	-3.48938
ENST00000246151.8:39-48	ENST00000246151.8	39	48	4	6	0	-2.72247
ENST00000246194.7:117-261	ENST00000246194.7	117	261	0	33	2	-5.89931
ENST00000246194.7:141-261	ENST00000246194.7	141	261	0	33	2	-5.89931
ENST00000246194.7:144-261	ENST00000246194.7	144	261	0	33	2	-5.89931
ENST00000246194.7:15-261	ENST00000246194.7	15	261	3	53	4	-6.36982
ENST00000246194.7:170-443	ENST00000246194.7	170	443	26	46	34	-2.75186
[truncated: 24,174 more rows]

## Sheet: SC samples
uORF_id	TransID	uORFstart	uORFstop	frame1_SC	frame2_SC	frame3_SC	SC_uORFScore
ENST00000005257.6:290-365	ENST00000005257.6	290	365	18	31	6	-4.17429
ENST00000005257.6:327-354	ENST00000005257.6	327	354	5	2	4	1.18442
ENST00000005257.6:51-354	ENST00000005257.6	51	354	5	10	10	-1.58496
ENST00000005257.6:6-354	ENST00000005257.6	6	354	5	10	10	-1.58496
ENST00000005257.6:87-354	ENST00000005257.6	87	354	5	10	10	-1.58496
ENST00000005257.6:89-365	ENST00000005257.6	89	365	24	31	11	-3.37346
ENST00000005257.6:96-354	ENST00000005257.6	96	354	5	10	10	-1.58496
ENST00000005257.6:99-354	ENST00000005257.6	99	354	5	10	10	-1.58496
ENST00000008527.9:103-265	ENST00000008527.9	103	265	6	6	4	0.584963
ENST00000008527.9:117-198	ENST00000008527.9	117	198	3	6	4	-1.05445
ENST00000008527.9:170-176	ENST00000008527.9	170	176	2	2	1	0.485427
ENST00000008527.9:21-198	ENST00000008527.9	21	198	3	6	4	-1.05445
ENST00000008527.9:261-633	ENST00000008527.9	261	633	2	8	4	-2.32193
ENST00000008527.9:264-633	ENST00000008527.9	264	633	2	8	4	-2.32193
ENST00000008527.9:34-265	ENST00000008527.9	34	265	6	6	4	0.584963
ENST00000008527.9:429-633	ENST00000008527.9	429	633	2	8	4	-2.32193
ENST00000008527.9:453-633	ENST00000008527.9	453	633	2	6	4	-1.58496
ENST00000008527.9:471-633	ENST00000008527.9	471	633	2	6	4	-1.58496
ENST00000008527.9:474-633	ENST00000008527.9	474	633	2	6	4	-1.58496
ENST00000008527.9:490-814	ENST00000008527.9	490	814	8	6	2	2.16993
ENST00000008527.9:493-814	ENST00000008527.9	493	814	8	6	2	2.16993
ENST00000008527.9:502-814	ENST00000008527.9	502	814	7	3	2	2.16993
ENST00000008527.9:514-814	ENST00000008527.9	514	814	7	2	1	2.848
ENST00000008527.9:532-814	ENST00000008527.9	532	814	7	2	1	2.848
ENST00000008527.9:548-779	ENST00000008527.9	548	779	1	1	3	-1.37851
ENST00000008527.9:7-265	ENST00000008527.9	7	265	6	8	4	-1.22239
ENST00000008527.9:70-265	ENST00000008527.9	70	265	6	6	4	0.584963
ENST00000008527.9:81-198	ENST00000008527.9	81	198	3	6	4	-1.05445
ENST00000008527.9:83-176	ENST00000008527.9	83	176	2	2	1	0.485427
ENST00000008527.9:87-198	ENST00000008527.9	87	198	3	6	4	-1.05445
ENST00000011619.5:26-47	ENST00000011619.5	26	47	0	6	0	-3.70044
ENST00000014914.5:107-599	ENST00000014914.5	107	599	3	9	3	-2.53605
ENST00000014914.5:110-599	ENST00000014914.5	110	599	3	9	3	-2.53605
ENST00000014914.5:131-599	ENST00000014914.5	131	599	3	9	3	-2.53605
ENST00000014914.5:176-599	ENST00000014914.5	176	599	3	8	3	-2.19265
ENST00000014914.5:191-599	ENST00000014914.5	191	599	3	8	3	-2.19265
ENST00000014914.5:215-599	ENST00000014914.5	215	599	3	8	3	-2.19265
ENST00000014914.5:227-599	ENST00000014914.5	227	599	3	5	3	-0.788496
ENST00000014914.5:275-599	ENST00000014914.5	275	599	3	5	1	-1.87447
ENST00000014914.5:287-599	ENST00000014914.5	287	599	3	5	1	-1.87447
ENST00000014914.5:296-599	ENST00000014914.5	296	599	3	5	1	-1.87447
ENST00000014914.5:311-599	ENST00000014914.5	311	599	3	5	1	-1.87447
ENST00000014914.5:329-599	ENST00000014914.5	329	599	3	5	1	-1.87447
ENST00000014914.5:335-599	ENST00000014914.5	335	599	3	5	1	-1.87447
ENST00000014914.5:356-599	ENST00000014914.5	356	599	3	5	1	-1.87447
ENST00000014914.5:362-599	ENST00000014914.5	362	599	2	5	1	-2.08746
ENST00000014914.5:398-599	ENST00000014914.5	398	599	2	5	1	-2.08746
ENST00000014914.5:440-599	ENST00000014914.5	440	599	2	1	1	0.584963
ENST00000014914.5:476-599	ENST00000014914.5	476	599	2	1	1	0.584963
ENST00000014914.5:488-599	ENST00000014914.5	488	599	2	1	1	0.584963
ENST00000014914.5:59-599	ENST00000014914.5	59	599	3	9	6	-2
ENST00000014914.5:8-599	ENST00000014914.5	8	599	3	9	6	-2
ENST00000014914.5:802-886	ENST00000014914.5	802	886	6	13	68	-6.33123
ENST00000014914.5:814-886	ENST00000014914.5	814	886	6	13	67	-6.2991
ENST00000014914.5:834-870	ENST00000014914.5	834	870	45	3	4	6.07187
ENST00000014914.5:846-870	ENST00000014914.5	846	870	42	3	4	5.94323
ENST00000014914.5:852-870	ENST00000014914.5	852	870	42	3	4	5.94323
ENST00000014914.5:856-886	ENST00000014914.5	856	886	4	12	61	-6.23281
ENST00000014914.5:92-599	ENST00000014914.5	92	599	3	9	6	-2
ENST00000014914.5:98-599	ENST00000014914.5	98	599	3	9	6	-2
ENST00000025399.10:11-32	ENST00000025399.10	11	32	0	75	0	-7.2384
ENST00000025399.10:5-32	ENST00000025399.10	5	32	0	75	0	-7.2384
ENST00000035307.6:1003-1135	ENST00000035307.6	1003	1135	12	18	4	-3.27886
ENST00000035307.6:1037-1130	ENST00000035307.6	1037	1130	10	1	4	3.23266
ENST00000035307.6:1058-1130	ENST00000035307.6	1058	1130	10	1	4	3.23266
ENST00000035307.6:1076-1130	ENST00000035307.6	1076	1130	10	1	4	3.23266
ENST00000035307.6:1079-1130	ENST00000035307.6	1079	1130	10	1	4	3.23266
ENST00000035307.6:1086-1158	ENST00000035307.6	1086	1158	1	4	10	-3.23266
ENST00000035307.6:1088-1130	ENST00000035307.6	1088	1130	10	1	4	3.23266
ENST00000035307.6:1113-1158	ENST00000035307.6	1113	1158	0	1	9	-3.96347
ENST00000035307.6:1116-1158	ENST00000035307.6	1116	1158	0	1	9	-3.96347
ENST00000035307.6:1123-1135	ENST00000035307.6	1123	1135	1	8	0	-3.77259
ENST00000035307.6:1126-1135	ENST00000035307.6	1126	1135	1	8	0	-3.77259
ENST00000035307.6:12-309	ENST00000035307.6	12	309	38	13	5	5.03342
ENST00000035307.6:150-309	ENST00000035307.6	150	309	38	12	4	5.17437
ENST00000035307.6:201-309	ENST00000035307.6	201	309	38	11	4	5.22846
ENST00000035307.6:230-410	ENST00000035307.6	230	410	12	54	13	-5.47963
ENST00000035307.6:243-309	ENST00000035307.6	243	309	38	11	4	5.22846
ENST00000035307.6:249-309	ENST00000035307.6	249	309	38	6	4	5.53916
ENST00000035307.6:266-410	ENST00000035307.6	266	410	12	53	6	-5.81495
ENST00000035307.6:269-410	ENST00000035307.6	269	410	9	41	6	-5.36882
ENST00000035307.6:275-410	ENST00000035307.6	275	410	9	39	6	-5.24793
ENST00000035307.6:300-309	ENST00000035307.6	300	309	15	1	1	4.58849
ENST00000035307.6:305-410	ENST00000035307.6	305	410	8	23	2	-4.47721
ENST00000035307.6:311-410	ENST00000035307.6	311	410	8	16	2	-3.63048
ENST00000035307.6:318-435	ENST00000035307.6	318	435	16	2	11	3.51271
ENST00000035307.6:320-410	ENST00000035307.6	320	410	8	16	0	-4.08746
ENST00000035307.6:364-862	ENST00000035307.6	364	862	22	22	35	-2.40012
ENST00000035307.6:406-862	ENST00000035307.6	406	862	22	21	31	-1.79055
ENST00000035307.6:409-862	ENST00000035307.6	409	862	22	21	31	-1.79055
ENST00000035307.6:436-862	ENST00000035307.6	436	862	22	18	31	-2.24686
ENST00000035307.6:481-862	ENST00000035307.6	481	862	15	18	30	-2.80735
ENST00000035307.6:514-862	ENST00000035307.6	514	862	13	11	30	-3.71272
ENST00000035307.6:516-594	ENST00000035307.6	516	594	4	8	1	-2.7425
ENST00000035307.6:536-656	ENST00000035307.6	536	656	3	11	6	-2.56071
ENST00000035307.6:54-309	ENST00000035307.6	54	309	38	13	5	5.03342
ENST00000035307.6:546-594	ENST00000035307.6	546	594	4	6	1	-2.15528
ENST00000035307.6:558-594	ENST00000035307.6	558	594	4	5	1	-1.848
ENST00000035307.6:562-862	ENST00000035307.6	562	862	10	11	29	-3.87971
ENST00000035307.6:578-656	ENST00000035307.6	578	656	3	8	3	-2.19265
ENST00000035307.6:584-656	ENST00000035307.6	584	656	3	8	3	-2.19265
ENST00000035307.6:594-774	ENST00000035307.6	594	774	18	5	10	3.14048
ENST00000035307.6:597-774	ENST00000035307.6	597	774	18	5	10	3.14048
ENST00000035307.6:601-862	ENST00000035307.6	601	862	5	10	26	-4.21799
ENST00000035307.6:603-774	ENST00000035307.6	603	774	18	5	10	3.14048
ENST00000035307.6:625-862	ENST00000035307.6	625	862	5	8	19	-3.48382
ENST00000035307.6:634-862	ENST00000035307.6	634	862	5	8	19	-3.48382
ENST00000035307.6:649-862	ENST00000035307.6	649	862	5	8	19	-3.48382
ENST00000035307.6:699-774	ENST00000035307.6	699	774	11	4	8	2.07635
ENST00000035307.6:702-774	ENST00000035307.6	702	774	11	4	8	2.07635
ENST00000035307.6:717-774	ENST00000035307.6	717	774	11	4	8	2.07635
ENST00000035307.6:734-791	ENST00000035307.6	734	791	5	19	4	-4.00643
ENST00000035307.6:739-862	ENST00000035307.6	739	862	3	4	9	-2.2854
ENST00000035307.6:746-791	ENST00000035307.6	746	791	0	9	3	-3.52356
ENST00000035307.6:761-791	ENST00000035307.6	761	791	0	9	1	-3.96347
ENST00000035307.6:81-309	ENST00000035307.6	81	309	38	13	5	5.03342
ENST00000035307.6:813-1041	ENST00000035307.6	813	1041	3	8	8	-1.8606
ENST00000035307.6:828-1041	ENST00000035307.6	828	1041	3	8	8	-1.8606
ENST00000035307.6:858-1041	ENST00000035307.6	858	1041	3	8	8	-1.8606
ENST00000035307.6:887-1130	ENST00000035307.6	887	1130	18	4	12	3.27886
ENST00000035307.6:903-1041	ENST00000035307.6	903	1041	3	8	8	-1.8606
ENST00000035307.6:941-1130	ENST00000035307.6	941	1130	18	4	12	3.27886
ENST00000035307.6:956-1130	ENST00000035307.6	956	1130	18	4	12	3.27886
ENST00000035307.6:99-309	ENST00000035307.6	99	309	38	13	5	5.03342
ENST00000035307.6:993-1041	ENST00000035307.6	993	1041	3	8	8	-1.8606
ENST00000037243.6:42-90	ENST00000037243.6	42	90	5	3	0	2.52356
ENST00000037243.6:48-90	ENST00000037243.6	48	90	3	2	0	1.926
ENST00000037243.6:54-90	ENST00000037243.6	54	90	3	2	0	1.926
ENST00000037243.6:66-90	ENST00000037243.6	66	90	3	0	0	2.80735
ENST00000037243.6:69-90	ENST00000037243.6	69	90	3	0	0	2.80735
ENST00000046640.7:285-501	ENST00000046640.7	285	501	10	34	6	-4.8339
ENST00000046640.7:309-501	ENST00000046640.7	309	501	10	33	6	-4.75489
ENST00000046640.7:321-501	ENST00000046640.7	321	501	10	33	6	-4.75489
ENST00000046640.7:330-501	ENST00000046640.7	330	501	10	30	6	-4.49603
ENST00000046640.7:350-383	ENST00000046640.7	350	383	1	5	14	-3.83794
ENST00000046640.7:365-383	ENST00000046640.7	365	383	1	5	14	-3.83794
ENST00000046640.7:370-520	ENST00000046640.7	370	520	30	6	10	4.49603
ENST00000046640.7:376-520	ENST00000046640.7	376	520	17	5	5	3.54432
ENST00000046640.7:379-520	ENST00000046640.7	379	520	17	5	5	3.54432
ENST00000046640.7:391-520	ENST00000046640.7	391	520	15	3	5	3.55859
ENST00000046640.7:406-520	ENST00000046640.7	406	520	12	3	3	3.32193
ENST00000046640.7:409-520	ENST00000046640.7	409	520	9	3	3	2.53605
ENST00000046640.7:411-501	ENST00000046640.7	411	501	3	9	3	-2.53605
ENST00000046640.7:418-520	ENST00000046640.7	418	520	9	3	1	3.16993
ENST00000046640.7:436-520	ENST00000046640.7	436	520	9	3	1	3.16993
ENST00000046640.7:445-520	ENST00000046640.7	445	520	9	3	1	3.16993
ENST00000046640.7:478-520	ENST00000046640.7	478	520	5	3	0	2.52356
ENST00000046640.7:497-545	ENST00000046640.7	497	545	1	0	5	-3
ENST00000052569.10:101-134	ENST00000052569.10	101	134	11	35	2	-5.224
ENST00000052569.10:110-134	ENST00000052569.10	110	134	0	6	1	-3.30117
ENST00000052569.10:140-233	ENST00000052569.10	140	233	6	0	0	3.70044
ENST00000052569.10:15-93	ENST00000052569.10	15	93	4	8	5	-1.3388
ENST00000052569.10:185-233	ENST00000052569.10	185	233	6	0	0	3.70044
ENST00000052569.10:21-93	ENST00000052569.10	21	93	4	8	5	-1.3388
ENST00000052569.10:25-124	ENST00000052569.10	25	124	10	17	39	-4.44746
ENST00000052569.10:36-93	ENST00000052569.10	36	93	4	7	5	-0.906891
ENST00000052569.10:38-134	ENST00000052569.10	38	134	17	39	9	-4.54083
ENST00000052569.10:50-134	ENST00000052569.10	50	134	16	39	9	-4.59059
ENST00000052569.10:79-124	ENST00000052569.10	79	124	9	12	38	-4.74762
ENST00000052569.10:87-93	ENST00000052569.10	87	93	3	7	0	-3.07039
ENST00000052569.10:89-134	ENST00000052569.10	89	134	12	37	2	-5.29408
ENST00000052569.10:93-111	ENST00000052569.10	93	111	35	1	12	5.27146
ENST00000052569.10:95-134	ENST00000052569.10	95	134	12	35	2	-5.17238
ENST00000052569.10:98-134	ENST00000052569.10	98	134	12	35	2	-5.17238
ENST00000061240.6:118-127	ENST00000061240.6	118	127	1	15	2	-4.41504
ENST00000061240.6:120-261	ENST00000061240.6	120	261	6	10	14	-2.07039
ENST00000061240.6:123-261	ENST00000061240.6	123	261	6	10	0	-3.39232
ENST00000061240.6:126-261	ENST00000061240.6	126	261	5	9	0	-3.28011
ENST00000061240.6:169-430	ENST00000061240.6	169	430	6	3	2	1.75002
ENST00000061240.6:17-56	ENST00000061240.6	17	56	1	5	0	-3
ENST00000061240.6:210-261	ENST00000061240.6	210	261	2	5	0	-2.6845
ENST00000061240.6:27-261	ENST00000061240.6	27	261	11	10	16	-1.4199
ENST00000061240.6:32-56	ENST00000061240.6	32	56	1	5	0	-3
ENST00000061240.6:330-516	ENST00000061240.6	330	516	1	9	1	-3.65951
ENST00000061240.6:35-56	ENST00000061240.6	35	56	1	5	0	-3
ENST00000061240.6:360-516	ENST00000061240.6	360	516	1	9	1	-3.65951
ENST00000061240.6:42-261	ENST00000061240.6	42	261	6	10	15	-2.30319
ENST00000061240.6:441-516	ENST00000061240.6	441	516	1	8	0	-3.77259
ENST00000061240.6:447-516	ENST00000061240.6	447	516	1	8	0	-3.77259
ENST00000061240.6:498-516	ENST00000061240.6	498	516	1	8	0	-3.77259
ENST00000061240.6:73-127	ENST00000061240.6	73	127	1	15	2	-4.41504
ENST00000061240.6:9-261	ENST00000061240.6	9	261	11	10	16	-1.4199
ENST00000064778.8:4-196	ENST00000064778.8	4	196	11	1	0	4.2854
ENST00000064778.8:97-196	ENST00000064778.8	97	196	11	1	0	4.2854
ENST00000072644.6:49-238	ENST00000072644.6	49	238	0	2	12	-4.22607
ENST00000072869.8:16-139	ENST00000072869.8	16	139	1	3	0	-2.16993
ENST00000072869.8:31-139	ENST00000072869.8	31	139	1	3	0	-2.16993
ENST00000072869.8:34-139	ENST00000072869.8	34	139	1	3	0	-2.16993
ENST00000075120.11:0-126	ENST00000075120.11	0	126	2	9	64	-6.54288
ENST00000075120.11:100-151	ENST00000075120.11	100	151	11	73	2	-6.71776
ENST00000075120.11:111-126	ENST00000075120.11	111	126	1	9	63	-6.56193
ENST00000075120.11:122-227	ENST00000075120.11	122	227	76	2	11	6.79325
ENST00000075120.11:128-227	ENST00000075120.11	128	227	15	1	6	3.88042
ENST00000075120.11:130-151	ENST00000075120.11	130	151	2	10	1	-3.61244
ENST00000075120.11:161-227	ENST00000075120.11	161	227	5	0	3	2.52356
ENST00000075120.11:170-227	ENST00000075120.11	170	227	5	0	3	2.52356
ENST00000075120.11:173-227	ENST00000075120.11	173	227	5	0	3	2.52356
ENST00000075120.11:177-219	ENST00000075120.11	177	219	0	3	4	-2.23704
ENST00000075120.11:186-219	ENST00000075120.11	186	219	0	3	4	-2.23704
ENST00000075120.11:192-219	ENST00000075120.11	192	219	0	3	4	-2.23704
ENST00000075120.11:24-126	ENST00000075120.11	24	126	2	9	64	-6.54288
ENST00000075120.11:70-151	ENST00000075120.11	70	151	11	74	2	-6.74333
ENST00000084798.8:481-631	ENST00000084798.8	481	631	2	6	0	-3
ENST00000084798.8:499-631	ENST00000084798.8	499	631	2	6	0	-3
ENST00000084798.8:505-631	ENST00000084798.8	505	631	2	6	0	-3
ENST00000084798.8:526-631	ENST00000084798.8	526	631	2	6	0	-3
ENST00000084798.8:535-631	ENST00000084798.8	535	631	2	6	0	-3
ENST00000084798.8:550-631	ENST00000084798.8	550	631	2	6	0	-3
ENST00000085079.11:100-181	ENST00000085079.11	100	181	7	9	8	-0.321928
ENST00000085079.11:112-181	ENST00000085079.11	112	181	7	7	6	0.137504
ENST00000085079.11:148-181	ENST00000085079.11	148	181	3	5	4	-0.584963
ENST00000085079.11:157-181	ENST00000085079.11	157	181	3	5	4	-0.584963
ENST00000085079.11:68-152	ENST00000085079.11	68	152	7	6	6	0.14439
ENST00000085079.11:80-152	ENST00000085079.11	80	152	6	6	4	0.584963
ENST00000085079.11:88-181	ENST00000085079.11	88	181	7	11	8	-1
ENST00000085079.11:92-152	ENST00000085079.11	92	152	4	4	4	0
ENST00000161863.8:20-68	ENST00000161863.8	20	68	0	7	2	-3.27302
ENST00000161863.8:26-68	ENST00000161863.8	26	68	0	7	2	-3.27302
ENST00000161863.8:35-68	ENST00000161863.8	35	68	0	7	2	-3.27302
ENST00000161863.8:53-68	ENST00000161863.8	53	68	0	3	1	-2.16993
ENST00000161863.8:56-68	ENST00000161863.8	56	68	0	3	1	-2.16993
ENST00000162391.7:11-494	ENST00000162391.7	11	494	10	4	14	-2.6845
ENST00000162391.7:131-494	ENST00000162391.7	131	494	10	4	12	-2.32193
ENST00000162391.7:228-411	ENST00000162391.7	228	411	2	5	5	-1.32193
ENST00000162391.7:231-411	ENST00000162391.7	231	411	2	5	5	-1.32193
ENST00000162391.7:263-494	ENST00000162391.7	263	494	10	4	8	1.82597
ENST00000162391.7:279-411	ENST00000162391.7	279	411	2	5	5	-1.32193
ENST00000162391.7:313-367	ENST00000162391.7	313	367	5	0	2	2.6845
ENST00000162391.7:332-494	ENST00000162391.7	332	494	10	4	8	1.82597
ENST00000162391.7:335-494	ENST00000162391.7	335	494	10	4	3	2.59904
ENST00000162391.7:363-411	ENST00000162391.7	363	411	2	0	5	-2.6845
ENST00000162391.7:383-494	ENST00000162391.7	383	494	10	2	3	3.10434
ENST00000162391.7:392-494	ENST00000162391.7	392	494	5	2	3	1.26303
ENST00000162391.7:426-879	ENST00000162391.7	426	879	21	19	18	0.311944
ENST00000162391.7:431-494	ENST00000162391.7	431	494	5	2	3	1.26303
ENST00000162391.7:456-879	ENST00000162391.7	456	879	20	18	17	0.327165
ENST00000162391.7:550-589	ENST00000162391.7	550	589	1	6	4	-2.15528
ENST00000162391.7:566-722	ENST00000162391.7	566	722	3	13	9	-2.82375
ENST00000162391.7:572-722	ENST00000162391.7	572	722	3	9	9	-2.14684
ENST00000162391.7:578-722	ENST00000162391.7	578	722	3	9	9	-2.14684
ENST00000162391.7:631-1030	ENST00000162391.7	631	1030	16	8	12	1.87447
ENST00000162391.7:714-879	ENST00000162391.7	714	879	6	14	4	-3
ENST00000162391.7:730-1030	ENST00000162391.7	730	1030	5	8	6	-0.796467
ENST00000162391.7:735-879	ENST00000162391.7	735	879	6	4	4	0.652077
ENST00000162749.6:100-154	ENST00000162749.6	100	154	46	16	11	4.92847
ENST00000162749.6:114-291	ENST00000162749.6	114	291	89	81	32	4.87219
ENST00000162749.6:12-291	ENST00000162749.6	12	291	93	99	32	-5.24079
ENST00000162749.6:121-154	ENST00000162749.6	121	154	29	15	6	4.09761
ENST00000162749.6:137-263	ENST00000162749.6	137	263	16	42	52	-4.31008
ENST00000162749.6:150-291	ENST00000162749.6	150	291	84	63	19	5.34947
ENST00000162749.6:159-291	ENST00000162749.6	159	291	79	51	15	5.44603
ENST00000162749.6:198-291	ENST00000162749.6	198	291	68	28	13	5.50765
ENST00000162749.6:203-263	ENST00000162749.6	203	263	1	24	7	-4.79116
ENST00000162749.6:240-291	ENST00000162749.6	240	291	45	18	12	4.68482
ENST00000162749.6:246-291	ENST00000162749.6	246	291	45	18	12	4.68482
ENST00000162749.6:269-281	ENST00000162749.6	269	281	0	40	7	-5.88887
ENST00000162749.6:31-154	ENST00000162749.6	31	154	47	16	14	4.79053
ENST00000164305.9:116-230	ENST00000164305.9	116	230	24	10	5	3.99305
ENST00000164305.9:146-230	ENST00000164305.9	146	230	24	10	5	3.99305
ENST00000164305.9:194-230	ENST00000164305.9	194	230	24	4	5	4.59042
ENST00000164305.9:203-230	ENST00000164305.9	203	230	24	4	5	4.59042
ENST00000174618.4:224-314	ENST00000174618.4	224	314	0	5	4	-2.5025
ENST00000174618.4:35-314	ENST00000174618.4	35	314	6	6	8	-0.485427
ENST00000175091.4:301-445	ENST00000175091.4	301	445	5	16	21	-3.4021
ENST00000175091.4:310-445	ENST00000175091.4	310	445	5	16	21	-3.4021
ENST00000175091.4:370-445	ENST00000175091.4	370	445	4	16	21	-3.60534
ENST00000175091.4:412-445	ENST00000175091.4	412	445	1	14	19	-4.02106
ENST00000181839.8:102-168	ENST00000181839.8	102	168	4	2	2	1
ENST00000181839.8:105-168	ENST00000181839.8	105	168	4	2	2	1
ENST00000181839.8:128-602	ENST00000181839.8	128	602	9	9	12	-0.678072
ENST00000181839.8:136-352	ENST00000181839.8	136	352	9	5	3	2.10236
ENST00000181839.8:139-352	ENST00000181839.8	139	352	9	5	3	2.10236
ENST00000181839.8:142-352	ENST00000181839.8	142	352	9	5	3	2.10236
ENST00000181839.8:164-602	ENST00000181839.8	164	602	9	6	12	-1.58496
ENST00000181839.8:17-602	ENST00000181839.8	17	602	13	10	14	-0.767827
ENST00000181839.8:170-602	ENST00000181839.8	170	602	9	6	12	-1.58496
ENST00000181839.8:179-602	ENST00000181839.8	179	602	9	6	12	-1.58496
ENST00000181839.8:192-201	ENST00000181839.8	192	201	2	9	1	-3.39232
ENST00000181839.8:197-602	ENST00000181839.8	197	602	7	4	3	1.51457
ENST00000181839.8:233-602	ENST00000181839.8	233	602	6	4	3	1.05445
ENST00000181839.8:41-602	ENST00000181839.8	41	602	13	10	14	-0.767827
ENST00000181839.8:44-602	ENST00000181839.8	44	602	13	10	14	-0.767827
ENST00000181839.8:73-352	ENST00000181839.8	73	352	11	9	7	0.917538
ENST00000181839.8:78-168	ENST00000181839.8	78	168	4	2	4	0.847997
ENST00000181839.8:80-602	ENST00000181839.8	80	602	13	10	14	-0.767827
ENST00000186436.9:24-45	ENST00000186436.9	24	45	12	6	7	1.79909
ENST00000190983.4:10-76	ENST00000190983.4	10	76	1	3	5	-1.87447
ENST00000190983.4:14-98	ENST00000190983.4	14	98	5	8	7	-0.765535
ENST00000190983.4:2-98	ENST00000190983.4	2	98	5	8	7	-0.765535
ENST00000190983.4:38-98	ENST00000190983.4	38	98	5	8	7	-0.765535
ENST00000190983.4:4-76	ENST00000190983.4	4	76	1	3	5	-1.87447
ENST00000190983.4:46-76	ENST00000190983.4	46	76	1	3	5	-1.87447
ENST00000190983.4:50-98	ENST00000190983.4	50	98	5	8	7	-0.765535
ENST00000190983.4:52-76	ENST00000190983.4	52	76	1	3	5	-1.87447
ENST00000190983.4:56-98	ENST00000190983.4	56	98	5	8	7	-0.765535
ENST00000190983.4:58-76	ENST00000190983.4	58	76	1	3	5	-1.87447
ENST00000190983.4:62-98	ENST00000190983.4	62	98	5	8	7	-0.765535
ENST00000190983.4:8-98	ENST00000190983.4	8	98	5	8	7	-0.765535
ENST00000192788.5:3-93	ENST00000192788.5	3	93	5	10	0	-3.45943
ENST00000192788.5:45-93	ENST00000192788.5	45	93	5	9	0	-3.28011
ENST00000192788.5:63-93	ENST00000192788.5	63	93	5	9	0	-3.28011
ENST00000199320.8:11-128	ENST00000199320.8	11	128	4	2	9	-2.63227
ENST00000199320.8:29-128	ENST00000199320.8	29	128	4	2	9	-2.63227
ENST00000199320.8:44-128	ENST00000199320.8	44	128	4	2	9	-2.63227
ENST00000199320.8:54-108	ENST00000199320.8	54	108	2	9	4	-2.63227
ENST00000199320.8:57-108	ENST00000199320.8	57	108	2	9	4	-2.63227
ENST00000199320.8:87-108	ENST00000199320.8	87	108	2	9	4	-2.63227
ENST00000199320.8:90-108	ENST00000199320.8	90	108	2	9	4	-2.63227
ENST00000200453.5:18-132	ENST00000200453.5	18	132	4	25	3	-4.90388
ENST00000200453.5:27-132	ENST00000200453.5	27	132	4	25	3	-4.90388
ENST00000200453.5:52-112	ENST00000200453.5	52	112	23	2	3	4.95752
ENST00000200453.5:55-112	ENST00000200453.5	55	112	23	2	3	4.95752
ENST00000200453.5:63-132	ENST00000200453.5	63	132	3	25	3	-5.01014
ENST00000200453.5:70-112	ENST00000200453.5	70	112	10	0	0	4.39232
ENST00000200453.5:73-112	ENST00000200453.5	73	112	10	0	0	4.39232
ENST00000200453.5:77-155	ENST00000200453.5	77	155	1	9	13	-3.42481
ENST00000200652.3:10-124	ENST00000200652.3	10	124	6	10	0	-3.39232
ENST00000200652.3:115-124	ENST00000200652.3	115	124	0	6	0	-3.70044
ENST00000200652.3:58-124	ENST00000200652.3	58	124	6	6	0	2.80735
ENST00000201031.2:146-212	ENST00000201031.2	146	212	1	0	5	-3
ENST00000201031.2:49-106	ENST00000201031.2	49	106	16	2	4	4.05627
ENST00000201031.2:73-106	ENST00000201031.2	73	106	15	2	4	3.90689
ENST00000201031.2:91-106	ENST00000201031.2	91	106	13	2	4	3.56585
ENST00000201031.2:95-212	ENST00000201031.2	95	212	3	4	6	-1.05445
ENST00000204517.10:126-288	ENST00000204517.10	126	288	0	8	1	-3.77259
ENST00000204517.10:15-288	ENST00000204517.10	15	288	0	8	2	-3.51096
ENST00000204517.10:18-288	ENST00000204517.10	18	288	0	8	2	-3.51096
ENST00000204517.10:228-288	ENST00000204517.10	228	288	0	8	1	-3.77259
ENST00000204517.10:246-288	ENST00000204517.10	246	288	0	7	1	-3.55459
ENST00000204517.10:33-288	ENST00000204517.10	33	288	0	8	2	-3.51096
ENST00000204517.10:45-288	ENST00000204517.10	45	288	0	8	1	-3.77259
ENST00000204517.10:66-288	ENST00000204517.10	66	288	0	8	1	-3.77259
ENST00000204961.4:206-737	ENST00000204961.4	206	737	5	1	0	3
ENST00000204961.4:266-737	ENST00000204961.4	266	737	3	1	0	2.16993
ENST00000204961.4:326-737	ENST00000204961.4	326	737	3	1	0	2.16993
ENST00000207549.8:151-319	ENST00000207549.8	151	319	1	1	5	-2.47805
ENST00000207549.8:208-319	ENST00000207549.8	208	319	1	1	5	-2.47805
ENST00000207549.8:25-79	ENST00000207549.8	25	79	2	0	1	1.58496
ENST00000209728.8:400-457	ENST00000209728.8	400	457	12	12	10	0.304855
ENST00000209728.8:409-457	ENST00000209728.8	409	457	11	12	9	-0.523562
ENST00000209728.8:427-457	ENST00000209728.8	427	457	5	12	9	-1.94342
ENST00000209875.8:0-75	ENST00000209875.8	0	75	79	34	90	-4.75594
ENST00000209875.8:28-70	ENST00000209875.8	28	70	33	78	5	-6.1529
ENST00000209875.8:30-75	ENST00000209875.8	30	75	79	34	90	-4.75594
ENST00000209875.8:33-75	ENST00000209875.8	33	75	79	34	90	-4.75594
ENST00000209875.8:63-75	ENST00000209875.8	63	75	77	7	47	5.8452
ENST00000209884.4:0-117	ENST00000209884.4	0	117	1	4	8	-2.7425
ENST00000209884.4:18-117	ENST00000209884.4	18	117	1	4	8	-2.7425
ENST00000209884.4:56-107	ENST00000209884.4	56	107	8	1	4	2.7425
ENST00000209884.4:66-117	ENST00000209884.4	66	117	1	3	8	-2.90689
ENST00000209884.4:69-117	ENST00000209884.4	69	117	1	3	8	-2.90689
ENST00000209884.4:83-107	ENST00000209884.4	83	107	8	0	1	3.77259
ENST00000211314.4:100-121	ENST00000211314.4	100	121	13	0	3	4.19967
ENST00000211314.4:112-121	ENST00000211314.4	112	121	13	0	3	4.19967
ENST00000211314.4:16-121	ENST00000211314.4	16	121	13	4	5	2.93289
ENST00000211314.4:76-121	ENST00000211314.4	76	121	13	4	3	3.33628
ENST00000215570.7:0-60	ENST00000215570.7	0	60	19	8	3	3.848
ENST00000215570.7:27-60	ENST00000215570.7	27	60	19	8	2	4.0338
ENST00000215570.7:32-80	ENST00000215570.7	32	80	2	19	7	-4.11746
ENST00000215570.7:6-60	ENST00000215570.7	6	60	19	8	3	3.848
ENST00000215582.7:10-49	ENST00000215582.7	10	49	2	4	11	-3.15094
ENST00000215582.7:24-84	ENST00000215582.7	24	84	11	2	3	3.33985
ENST00000215631.8:103-136	ENST00000215631.8	103	136	0	11	8	-3.48678
ENST00000215631.8:123-225	ENST00000215631.8	123	225	17	11	19	-1.68382
ENST00000215631.8:138-225	ENST00000215631.8	138	225	11	11	12	-0.0824622
ENST00000215631.8:25-136	ENST00000215631.8	25	136	4	11	10	-2.15056
ENST00000215631.8:42-225	ENST00000215631.8	42	225	21	15	23	-1.46609
ENST00000215754.7:380-407	ENST00000215754.7	380	407	23	53	1	-5.75731
ENST00000215754.7:383-407	ENST00000215754.7	383	407	16	53	0	-6.02815
ENST00000215754.7:401-407	ENST00000215754.7	401	407	6	48	0	-6.26679
ENST00000215793.12:59-101	ENST00000215793.12	59	101	3	2	2	0.36257
ENST00000215793.12:75-144	ENST00000215793.12	75	144	48	6	7	5.84528
ENST00000215794.7:122-323	ENST00000215794.7	122	323	7	5	31	-4.91692
ENST00000215794.7:125-323	ENST00000215794.7	125	323	7	5	31	-4.91692
ENST00000215794.7:177-351	ENST00000215794.7	177	351	5	34	7	-5.13822
ENST00000215794.7:184-424	ENST00000215794.7	184	424	33	9	6	4.82655
ENST00000215794.7:191-323	ENST00000215794.7	191	323	4	5	30	-5.10369
ENST00000215794.7:200-323	ENST00000215794.7	200	323	4	5	30	-5.10369
ENST00000215794.7:205-424	ENST00000215794.7	205	424	33	7	6	4.98026
ENST00000215794.7:278-323	ENST00000215794.7	278	323	4	4	30	-5.19294
ENST00000215794.7:280-424	ENST00000215794.7	280	424	33	7	5	5.06752
ENST00000215794.7:300-351	ENST00000215794.7	300	351	2	33	2	-5.72645
ENST00000215794.7:304-424	ENST00000215794.7	304	424	33	4	3	5.47735
ENST00000215794.7:308-323	ENST00000215794.7	308	323	1	2	30	-5.6517
ENST00000215794.7:312-351	ENST00000215794.7	312	351	2	33	2	-5.72645
ENST00000215794.7:319-424	ENST00000215794.7	319	424	3	4	2	-0.736966
ENST00000215794.7:334-424	ENST00000215794.7	334	424	3	3	1	1.09954
ENST00000215794.7:51-351	ENST00000215794.7	51	351	5	35	8	-5.13443
ENST00000215794.7:59-323	ENST00000215794.7	59	323	7	5	31	-4.91692
ENST00000215794.7:6-351	ENST00000215794.7	6	351	5	35	8	-5.13443
ENST00000215794.7:68-323	ENST00000215794.7	68	323	7	5	31	-4.91692
ENST00000215794.7:81-351	ENST00000215794.7	81	351	5	34	8	-5.06471
ENST00000215829.7:460-559	ENST00000215829.7	460	559	0	22	25	-4.63153
ENST00000215829.7:478-559	ENST00000215829.7	478	559	0	22	25	-4.63153
ENST00000215829.7:502-559	ENST00000215829.7	502	559	0	22	25	-4.63153
ENST00000215829.7:509-524	ENST00000215829.7	509	524	22	25	0	-4.63153
ENST00000215909.9:8-53	ENST00000215909.9	8	53	11	6	2	2.89162
ENST00000216014.8:95-161	ENST00000216014.8	95	161	6	0	1	3.30117
ENST00000216038.5:22-31	ENST00000216038.5	22	31	1	6	3	-2.26303
ENST00000216039.9:123-186	ENST00000216039.9	123	186	3	2	8	-2.52838
ENST00000216039.9:131-206	ENST00000216039.9	131	206	12	1	3	3.79442
ENST00000216039.9:165-186	ENST00000216039.9	165	186	0	2	8	-3.51096
ENST00000216039.9:169-286	ENST00000216039.9	169	286	3	15	2	-4.06178
ENST00000216039.9:197-206	ENST00000216039.9	197	206	3	1	1	1.37851
ENST00000216039.9:249-441	ENST00000216039.9	249	441	7	0	1	3.55459
ENST00000216039.9:31-286	ENST00000216039.9	31	286	5	16	5	-3.36565
ENST00000216039.9:97-286	ENST00000216039.9	97	286	5	16	5	-3.36565
ENST00000216085.11:112-178	ENST00000216085.11	112	178	2	0	6	-3
ENST00000216085.11:122-170	ENST00000216085.11	122	170	0	6	2	-3
ENST00000216085.11:124-178	ENST00000216085.11	124	178	2	0	6	-3
ENST00000216085.11:52-178	ENST00000216085.11	52	178	2	0	9	-3.72048
ENST00000216085.11:55-178	ENST00000216085.11	55	178	2	0	9	-3.72048
ENST00000216085.11:80-170	ENST00000216085.11	80	170	0	9	2	-3.72048
ENST00000216085.11:84-285	ENST00000216085.11	84	285	9	2	0	3.72048
ENST00000216181.9:102-225	ENST00000216181.9	102	225	10	10	12	-0.321928
ENST00000216181.9:105-225	ENST00000216181.9	105	225	10	10	12	-0.321928
ENST00000216181.9:33-225	ENST00000216181.9	33	225	12	13	17	-1
ENST00000216181.9:42-225	ENST00000216181.9	42	225	12	10	15	-1.01937
ENST00000216218.7:379-451	ENST00000216218.7	379	451	3	1	2	1
ENST00000216218.7:403-451	ENST00000216218.7	403	451	3	1	2	1
ENST00000216237.9:100-136	ENST00000216237.9	100	136	0	7	3	-3.07039
ENST00000216237.9:115-136	ENST00000216237.9	115	136	0	7	3	-3.07039
ENST00000216237.9:17-152	ENST00000216237.9	17	152	7	3	1	2.60666
ENST00000216237.9:2-152	ENST00000216237.9	2	152	7	3	1	2.60666
ENST00000216237.9:47-152	ENST00000216237.9	47	152	7	3	1	2.60666
ENST00000216237.9:82-136	ENST00000216237.9	82	136	0	7	3	-3.07039
ENST00000216277.12:102-195	ENST00000216277.12	102	195	12	11	2	3.04963
ENST00000216277.12:114-195	ENST00000216277.12	114	195	12	9	2	2.97628
ENST00000216277.12:153-195	ENST00000216277.12	153	195	10	9	1	3.05311
ENST00000216277.12:39-75	ENST00000216277.12	39	75	9	31	1	-5.18258
ENST00000216297.6:89-287	ENST00000216297.6	89	287	5	0	3	2.52356
ENST00000216297.6:92-287	ENST00000216297.6	92	287	5	0	3	2.52356
ENST00000216455.8:17-59	ENST00000216455.8	17	59	7	0	10	-3.36375
ENST00000216479.7:113-152	ENST00000216479.7	113	152	22	124	29	-6.81125
ENST00000216479.7:119-152	ENST00000216479.7	119	152	21	111	19	-6.7908
ENST00000216479.7:134-152	ENST00000216479.7	134	152	17	87	14	-6.45554
ENST00000216479.7:137-152	ENST00000216479.7	137	152	17	87	7	-6.69631
ENST00000216479.7:49-109	ENST00000216479.7	49	109	18	4	3	4.16027
ENST00000216479.7:89-152	ENST00000216479.7	89	152	25	134	41	-6.71328
ENST00000217109.8:133-193	ENST00000217109.8	133	193	3	26	2	-5.19682
ENST00000217109.8:139-193	ENST00000217109.8	139	193	3	26	2	-5.19682
ENST00000217159.5:0-174	ENST00000217159.5	0	174	5	9	9	-1.2578
ENST00000217159.5:100-151	ENST00000217159.5	100	151	3	0	3	2
ENST00000217159.5:147-174	ENST00000217159.5	147	174	2	3	0	-1.926
ENST00000217159.5:24-174	ENST00000217159.5	24	174	5	9	9	-1.2578
ENST00000217159.5:28-151	ENST00000217159.5	28	151	8	9	3	-2.03562
ENST00000217159.5:40-151	ENST00000217159.5	40	151	8	0	3	3.30875
ENST00000217159.5:63-174	ENST00000217159.5	63	174	5	5	0	2.58496
ENST00000217182.4:139-244	ENST00000217182.4	139	244	28	29	8	-3.80259
ENST00000217182.4:144-207	ENST00000217182.4	144	207	4	9	6	-1.58496
ENST00000217182.4:147-207	ENST00000217182.4	147	207	2	9	5	-2.49185
ENST00000217182.4:185-284	ENST00000217182.4	185	284	32	24	20	1.98089
ENST00000217182.4:236-284	ENST00000217182.4	236	284	29	23	17	2.04629
ENST00000217182.4:50-185	ENST00000217182.4	50	185	20	9	9	2.88136
ENST00000217182.4:86-185	ENST00000217182.4	86	185	20	9	9	2.88136
ENST00000217233.7:179-422	ENST00000217233.7	179	422	5	3	8	-1.75489
ENST00000217233.7:188-422	ENST00000217233.7	188	422	5	3	8	-1.75489
ENST00000217233.7:260-422	ENST00000217233.7	260	422	3	1	8	-2.90689
ENST00000217233.7:275-422	ENST00000217233.7	275	422	0	1	8	-3.77259
ENST00000217233.7:308-422	ENST00000217233.7	308	422	0	1	8	-3.77259
ENST00000217233.7:341-422	ENST00000217233.7	341	422	0	1	8	-3.77259
ENST00000217244.7:103-316	ENST00000217244.7	103	316	18	4	16	3.3295
ENST00000217244.7:172-316	ENST00000217244.7	172	316	18	2	16	3.77259
ENST00000217244.7:185-248	ENST00000217244.7	185	248	2	16	18	-3.77259
ENST00000217244.7:195-216	ENST00000217244.7	195	216	9	17	2	-3.70834
ENST00000217244.7:202-316	ENST00000217244.7	202	316	5	2	0	2.6845
ENST00000217244.7:40-316	ENST00000217244.7	40	316	18	4	16	3.3295
ENST00000217244.7:67-316	ENST00000217244.7	67	316	18	4	16	3.3295
ENST00000217289.8:189-303	ENST00000217289.8	189	303	0	6	0	-3.70044
ENST00000217289.8:192-303	ENST00000217289.8	192	303	0	6	0	-3.70044
ENST00000217289.8:198-303	ENST00000217289.8	198	303	0	6	0	-3.70044
ENST00000217426.6:20-35	ENST00000217426.6	20	35	10	3	0	3.71741
ENST00000217426.6:5-35	ENST00000217426.6	5	35	10	3	0	3.71741
ENST00000217652.7:149-371	ENST00000217652.7	149	371	0	40	14	-5.54775
ENST00000217652.7:155-371	ENST00000217652.7	155	371	0	40	14	-5.54775
ENST00000217652.7:167-371	ENST00000217652.7	167	371	0	40	14	-5.54775
ENST00000217652.7:212-371	ENST00000217652.7	212	371	0	40	14	-5.54775
ENST00000217652.7:245-371	ENST00000217652.7	245	371	0	40	14	-5.54775
ENST00000217652.7:266-371	ENST00000217652.7	266	371	0	40	14	-5.54775
ENST00000217652.7:324-387	ENST00000217652.7	324	387	48	27	41	2.78948
ENST00000217652.7:353-371	ENST00000217652.7	353	371	0	40	12	-5.63272
ENST00000217893.9:116-278	ENST00000217893.9	116	278	22	57	40	-4.03961
ENST00000217893.9:152-278	ENST00000217893.9	152	278	22	57	40	-4.03961
ENST00000217893.9:155-278	ENST00000217893.9	155	278	22	57	40	-4.03961
ENST00000217893.9:170-278	ENST00000217893.9	170	278	22	57	40	-4.03961
ENST00000217893.9:236-278	ENST00000217893.9	236	278	22	57	40	-4.03961
ENST00000217893.9:249-264	ENST00000217893.9	249	264	30	40	10	-4.20945
ENST00000217893.9:251-278	ENST00000217893.9	251	278	22	57	40	-4.03961
ENST00000217893.9:255-264	ENST00000217893.9	255	264	30	40	10	-4.20945
ENST00000217964.11:101-632	ENST00000217964.11	101	632	7	10	1	-3
ENST00000217964.11:119-632	ENST00000217964.11	119	632	7	10	1	-3
ENST00000217964.11:168-450	ENST00000217964.11	168	450	3	0	3	2
ENST00000217964.11:23-632	ENST00000217964.11	23	632	7	10	1	-3
ENST00000217964.11:35-632	ENST00000217964.11	35	632	7	10	1	-3
ENST00000217964.11:39-450	ENST00000217964.11	39	450	6	0	5	2.73039
ENST00000217964.11:69-450	ENST00000217964.11	69	450	6	0	5	2.73039
ENST00000217964.11:79-544	ENST00000217964.11	79	544	0	5	6	-2.73039
ENST00000217964.11:85-544	ENST00000217964.11	85	544	0	5	6	-2.73039
ENST00000217971.7:6-84	ENST00000217971.7	6	84	7	13	61	-6.04196
ENST00000218056.9:143-221	ENST00000218056.9	143	221	6	3	3	1.32193
ENST00000218056.9:149-221	ENST00000218056.9	149	221	6	2	3	1.75002
ENST00000218056.9:155-221	ENST00000218056.9	155	221	6	2	3	1.75002
ENST00000218056.9:189-273	ENST00000218056.9	189	273	2	4	6	-1.58496
ENST00000218056.9:193-421	ENST00000218056.9	193	421	10	21	2	-4.13303
ENST00000218056.9:200-221	ENST00000218056.9	200	221	6	2	3	1.75002
ENST00000218056.9:214-421	ENST00000218056.9	214	421	10	17	0	-4.1062
ENST00000218056.9:23-38	ENST00000218056.9	23	38	3	1	8	-2.90689
ENST00000218056.9:235-421	ENST00000218056.9	235	421	7	15	0	-4.03242
ENST00000218056.9:247-421	ENST00000218056.9	247	421	7	15	0	-4.03242
ENST00000218056.9:27-159	ENST00000218056.9	27	159	2	9	3	-2.8365
ENST00000218056.9:277-421	ENST00000218056.9	277	421	6	15	0	-4.11151
ENST00000218056.9:295-421	ENST00000218056.9	295	421	6	15	0	-4.11151
ENST00000218056.9:319-421	ENST00000218056.9	319	421	6	15	0	-4.11151
ENST00000218056.9:322-421	ENST00000218056.9	322	421	6	15	0	-4.11151
ENST00000218056.9:328-421	ENST00000218056.9	328	421	6	12	0	-3.70044
ENST00000218056.9:34-421	ENST00000218056.9	34	421	16	24	4	-3.8893
ENST00000218056.9:352-421	ENST00000218056.9	352	421	6	12	0	-3.70044
ENST00000218056.9:4-421	ENST00000218056.9	4	421	19	27	5	-3.96239
ENST00000218056.9:71-221	ENST00000218056.9	71	221	6	4	3	1.05445
ENST00000218104.5:120-297	ENST00000218104.5	120	297	14	16	11	-0.946229
ENST00000218104.5:141-297	ENST00000218104.5	141	297	12	12	9	0.628031
ENST00000218104.5:17-212	ENST00000218104.5	17	212	11	17	39	-4.35492
ENST00000218104.5:177-297	ENST00000218104.5	177	297	10	7	2	2.62244
ENST00000218104.5:198-297	ENST00000218104.5	198	297	9	7	2	2.41504
ENST00000218104.5:21-297	ENST00000218104.5	21	297	25	43	12	-4.26115
ENST00000218104.5:27-297	ENST00000218104.5	27	297	25	43	12	-4.26115
ENST00000218104.5:30-297	ENST00000218104.5	30	297	25	43	12	-4.26115
ENST00000218104.5:6-297	ENST00000218104.5	6	297	25	43	12	-4.26115
ENST00000218104.5:75-297	ENST00000218104.5	75	297	25	42	12	-4.18506
ENST00000218104.5:89-212	ENST00000218104.5	89	212	10	17	23	-2.60407
ENST00000218104.5:98-212	ENST00000218104.5	98	212	10	6	13	-1.82852
ENST00000218388.8:10-25	ENST00000218388.8	10	25	1	19	0	-5.1416
ENST00000218388.8:13-25	ENST00000218388.8	13	25	1	19	0	-5.1416
ENST00000218388.8:17-29	ENST00000218388.8	17	29	19	0	0	5.2854
ENST00000218388.8:7-25	ENST00000218388.8	7	25	1	19	0	-5.1416
ENST00000219204.7:146-197	ENST00000219204.7	146	197	0	16	0	-5.04439
ENST00000219204.7:167-197	ENST00000219204.7	167	197	0	16	0	-5.04439
ENST00000219271.3:196-649	ENST00000219271.3	196	649	5	4	9	-1.73697
ENST00000219271.3:217-649	ENST00000219271.3	217	649	5	4	9	-1.73697
ENST00000219271.3:232-649	ENST00000219271.3	232	649	5	4	9	-1.73697
ENST00000219454.9:103-193	ENST00000219454.9	103	193	5	10	6	-1.58496
ENST00000219454.9:170-221	ENST00000219454.9	170	221	11	2	4	3.15094
ENST00000219454.9:172-193	ENST00000219454.9	172	193	4	10	1	-3.23266
ENST00000219454.9:175-193	ENST00000219454.9	175	193	4	10	1	-3.23266
ENST00000219454.9:179-221	ENST00000219454.9	179	221	11	2	4	3.15094
ENST00000219454.9:49-193	ENST00000219454.9	49	193	5	10	6	-1.58496
ENST00000219454.9:52-193	ENST00000219454.9	52	193	5	10	6	-1.58496
ENST00000219454.9:70-193	ENST00000219454.9	70	193	5	10	6	-1.58496
ENST00000219454.9:79-193	ENST00000219454.9	79	193	5	10	6	-1.58496
ENST00000219454.9:85-193	ENST00000219454.9	85	193	5	10	6	-1.58496
ENST00000219454.9:94-193	ENST00000219454.9	94	193	5	10	6	-1.58496
ENST00000219473.11:18-102	ENST00000219473.11	18	102	1	6	34	-5.56355
ENST00000219473.11:24-102	ENST00000219473.11	24	102	1	6	34	-5.56355
ENST00000219473.11:30-102	ENST00000219473.11	30	102	1	5	34	-5.63372
ENST00000219473.11:46-73	ENST00000219473.11	46	73	3	34	0	-5.86936
ENST00000220003.13:118-619	ENST00000220003.13	118	619	36	20	18	3.15249
ENST00000220003.13:135-591	ENST00000220003.13	135	591	13	35	11	-4.2505
ENST00000220003.13:151-619	ENST00000220003.13	151	619	35	20	18	3.01719
ENST00000220003.13:165-591	ENST00000220003.13	165	591	13	35	11	-4.2505
ENST00000220003.13:201-591	ENST00000220003.13	201	591	13	35	11	-4.2505
ENST00000220003.13:258-591	ENST00000220003.13	258	591	13	35	11	-4.2505
ENST00000220003.13:281-683	ENST00000220003.13	281	683	20	18	35	-3.01719
ENST00000220003.13:345-591	ENST00000220003.13	345	591	13	34	9	-4.34493
ENST00000220003.13:366-591	ENST00000220003.13	366	591	11	23	3	-4.1237
ENST00000220003.13:78-591	ENST00000220003.13	78	591	13	36	11	-4.34341
ENST00000220003.13:9-591	ENST00000220003.13	9	591	13	36	11	-4.34341
ENST00000220003.13:93-591	ENST00000220003.13	93	591	13	36	11	-4.34341
ENST00000220562.8:197-386	ENST00000220562.8	197	386	1	7	6	-2.44057
ENST00000220562.8:269-386	ENST00000220562.8	269	386	1	6	5	-2.16993
ENST00000220562.8:318-480	ENST00000220562.8	318	480	10	7	5	1.44746
ENST00000220562.8:323-386	ENST00000220562.8	323	386	0	6	5	-2.73039
ENST00000220562.8:344-386	ENST00000220562.8	344	386	0	6	5	-2.73039
ENST00000220562.8:372-480	ENST00000220562.8	372	480	8	2	5	2.20163
ENST00000220562.8:375-480	ENST00000220562.8	375	480	8	2	5	2.20163
ENST00000220562.8:385-433	ENST00000220562.8	385	433	2	5	0	-2.6845
ENST00000220562.8:51-480	ENST00000220562.8	51	480	11	8	6	1.33342
ENST00000220562.8:550-745	ENST00000220562.8	550	745	1	2	0	-1.58496
ENST00000220562.8:680-866	ENST00000220562.8	680	866	2	1	1	0.584963
ENST00000220562.8:77-386	ENST00000220562.8	77	386	1	7	6	-2.44057
ENST00000221138.8:54-180	ENST00000221138.8	54	180	12	1	1	4.19265
ENST00000221138.8:9-180	ENST00000221138.8	9	180	12	1	1	4.19265
ENST00000221232.9:270-306	ENST00000221232.9	270	306	3	22	5	-4.51096
ENST00000221249.10:169-271	ENST00000221249.10	169	271	7	7	0	3
ENST00000221249.10:190-271	ENST00000221249.10	190	271	7	7	0	3
ENST00000221249.10:199-271	ENST00000221249.10	199	271	7	7	0	3
ENST00000221249.10:202-271	ENST00000221249.10	202	271	7	7	0	3
ENST00000221249.10:212-386	ENST00000221249.10	212	386	12	1	7	3.33628
ENST00000221249.10:223-271	ENST00000221249.10	223	271	7	7	0	3
ENST00000221249.10:232-271	ENST00000221249.10	232	271	7	7	0	3
ENST00000221249.10:238-271	ENST00000221249.10	238	271	7	7	0	3
ENST00000221265.7:137-299	ENST00000221265.7	137	299	11	8	27	-3.86876
ENST00000221265.7:140-299	ENST00000221265.7	140	299	11	5	27	-4.25145
ENST00000221265.7:166-259	ENST00000221265.7	166	259	23	9	1	4.55738
ENST00000221265.7:20-299	ENST00000221265.7	20	299	11	13	30	-3.71272
ENST00000221265.7:79-160	ENST00000221265.7	79	160	6	2	9	-2.42033
ENST00000221265.7:95-299	ENST00000221265.7	95	299	11	13	30	-3.71272
ENST00000221462.8:109-235	ENST00000221462.8	109	235	4	3	2	0.736966
ENST00000221462.8:155-260	ENST00000221462.8	155	260	2	2	1	0.485427
ENST00000221462.8:159-348	ENST00000221462.8	159	348	2	1	1	0.584963
ENST00000221462.8:165-348	ENST00000221462.8	165	348	2	1	1	0.584963
ENST00000221462.8:201-348	ENST00000221462.8	201	348	2	1	1	0.584963
ENST00000221462.8:218-260	ENST00000221462.8	218	260	1	2	1	-0.584963
ENST00000221462.8:224-260	ENST00000221462.8	224	260	1	2	1	-0.584963
ENST00000221462.8:40-235	ENST00000221462.8	40	235	5	3	2	1.26303
ENST00000221462.8:61-235	ENST00000221462.8	61	235	5	3	2	1.26303
ENST00000221462.8:85-235	ENST00000221462.8	85	235	4	3	2	0.736966
ENST00000221486.4:50-62	ENST00000221486.4	50	62	0	12	0	-4.64386
ENST00000221801.7:42-75	ENST00000221801.7	42	75	4	10	1	-3.23266
ENST00000221801.7:63-75	ENST00000221801.7	63	75	2	8	0	-3.51096
ENST00000221855.7:117-159	ENST00000221855.7	117	159	8	14	10	-1.45943
ENST00000221855.7:123-159	ENST00000221855.7	123	159	6	12	9	-1.58496
ENST00000221855.7:126-159	ENST00000221855.7	126	159	6	12	8	-1.65711
ENST00000221855.7:143-212	ENST00000221855.7	143	212	5	6	5	-0.169925
ENST00000221855.7:146-212	ENST00000221855.7	146	212	5	6	2	-1.58496
ENST00000221855.7:72-159	ENST00000221855.7	72	159	14	27	26	-2.50756
ENST00000221855.7:85-487	ENST00000221855.7	85	487	29	28	18	1.9855
ENST00000221930.5:110-554	ENST00000221930.5	110	554	7	29	33	-4.17341
ENST00000221930.5:191-554	ENST00000221930.5	191	554	4	15	19	-3.39593
ENST00000221930.5:214-286	ENST00000221930.5	214	286	9	1	1	3.65951
ENST00000221930.5:296-554	ENST00000221930.5	296	554	3	10	8	-2.23704
ENST00000221930.5:302-554	ENST00000221930.5	302	554	2	9	1	-3.39232
ENST00000221930.5:328-571	ENST00000221930.5	328	571	1	4	2	-1.58496
ENST00000221930.5:361-571	ENST00000221930.5	361	571	1	4	2	-1.58496
ENST00000221930.5:385-571	ENST00000221930.5	385	571	1	4	2	-1.58496
ENST00000221930.5:397-571	ENST00000221930.5	397	571	1	4	2	-1.58496
ENST00000221930.5:412-571	ENST00000221930.5	412	571	1	4	2	-1.58496
ENST00000221930.5:590-737	ENST00000221930.5	590	737	8	12	7	-1.35364
ENST00000221930.5:607-667	ENST00000221930.5	607	667	5	1	6	-2.16993
ENST00000222120.7:156-222	ENST00000222120.7	156	222	11	7	0	3.5025
ENST00000222120.7:51-222	ENST00000222120.7	51	222	11	7	0	3.5025
ENST00000222120.7:54-222	ENST00000222120.7	54	222	11	7	0	3.5025
ENST00000222254.12:101-143	ENST00000222254.12	101	143	0	3	1	-2.16993
ENST00000222254.12:118-286	ENST00000222254.12	118	286	20	19	4	3.60991
ENST00000222254.12:129-294	ENST00000222254.12	129	294	7	41	19	-4.788
ENST00000222254.12:13-286	ENST00000222254.12	13	286	22	19	9	2.7137
ENST00000222254.12:139-286	ENST00000222254.12	139	286	19	19	3	3.75358
ENST00000222254.12:142-286	ENST00000222254.12	142	286	19	19	3	3.75358
ENST00000222254.12:149-344	ENST00000222254.12	149	344	21	6	40	-4.75489
ENST00000222254.12:160-286	ENST00000222254.12	160	286	19	19	3	3.75358
ENST00000222254.12:191-344	ENST00000222254.12	191	344	21	6	39	-4.69032
ENST00000222254.12:201-294	ENST00000222254.12	201	294	6	39	18	-4.7851
ENST00000222254.12:204-294	ENST00000222254.12	204	294	6	39	18	-4.7851
ENST00000222254.12:212-344	ENST00000222254.12	212	344	20	6	35	-4.43886
ENST00000222254.12:220-286	ENST00000222254.12	220	286	14	18	3	-3.50371
ENST00000222254.12:229-286	ENST00000222254.12	229	286	14	15	3	-3.21917
ENST00000222254.12:233-344	ENST00000222254.12	233	344	17	5	32	-4.41504
ENST00000222254.12:236-344	ENST00000222254.12	236	344	17	5	32	-4.41504
ENST00000222254.12:260-344	ENST00000222254.12	260	344	16	5	26	-3.91505
ENST00000222254.12:270-294	ENST00000222254.12	270	294	3	22	0	-5.13586
ENST00000222254.12:282-294	ENST00000222254.12	282	294	3	22	0	-5.13586
ENST00000222254.12:60-294	ENST00000222254.12	60	294	12	43	19	-4.48751
ENST00000222254.12:90-294	ENST00000222254.12	90	294	9	41	19	-4.60314
ENST00000222254.12:98-143	ENST00000222254.12	98	143	0	3	1	-2.16993
ENST00000222553.7:1-214	ENST00000222553.7	1	214	7	0	5	2.90689
ENST00000222553.7:155-236	ENST00000222553.7	155	236	1	5	8	-2.65208
ENST00000222553.7:210-219	ENST00000222553.7	210	219	5	6	0	-2.73039
ENST00000222553.7:43-214	ENST00000222553.7	43	214	7	0	5	2.90689
ENST00000222553.7:89-236	ENST00000222553.7	89	236	1	5	8	-2.65208
ENST00000222553.7:97-214	ENST00000222553.7	97	214	6	0	5	2.73039
ENST00000222573.4:140-566	ENST00000222573.4	140	566	10	8	2	2.63227
ENST00000222573.4:155-566	ENST00000222573.4	155	566	10	8	2	2.63227
ENST00000222573.4:269-566	ENST00000222573.4	269	566	10	8	2	2.63227
ENST00000222573.4:305-566	ENST00000222573.4	305	566	10	8	2	2.63227
ENST00000222573.4:312-498	ENST00000222573.4	312	498	5	1	9	-2.88753
ENST00000222573.4:333-498	ENST00000222573.4	333	498	5	1	9	-2.88753
ENST00000222573.4:359-566	ENST00000222573.4	359	566	10	8	2	2.63227
ENST00000222573.4:374-566	ENST00000222573.4	374	566	10	8	2	2.63227
ENST00000222573.4:385-586	ENST00000222573.4	385	586	2	14	8	-3.32193
ENST00000222573.4:420-498	ENST00000222573.4	420	498	5	1	9	-2.88753
ENST00000222573.4:436-586	ENST00000222573.4	436	586	2	14	8	-3.32193
ENST00000222573.4:466-586	ENST00000222573.4	466	586	1	6	3	-2.26303
ENST00000222573.4:494-566	ENST00000222573.4	494	566	1	3	1	-1.37851
ENST00000222573.4:499-586	ENST00000222573.4	499	586	1	5	3	-1.87447
ENST00000222573.4:509-566	ENST00000222573.4	509	566	1	3	1	-1.37851
ENST00000222747.7:150-576	ENST00000222747.7	150	576	2	4	6	-1.58496
ENST00000222747.7:216-576	ENST00000222747.7	216	576	2	4	6	-1.58496
ENST00000222747.7:226-475	ENST00000222747.7	226	475	1	6	2	-2.5025
ENST00000222747.7:232-475	ENST00000222747.7	232	475	1	6	2	-2.5025
ENST00000222747.7:238-475	ENST00000222747.7	238	475	1	6	2	-2.5025
ENST00000222747.7:277-475	ENST00000222747.7	277	475	1	6	2	-2.5025
ENST00000222747.7:295-475	ENST00000222747.7	295	475	1	6	2	-2.5025
ENST00000222747.7:328-475	ENST00000222747.7	328	475	1	6	1	-2.85798
ENST00000222747.7:331-475	ENST00000222747.7	331	475	1	6	1	-2.85798
ENST00000222747.7:378-576	ENST00000222747.7	378	576	1	4	6	-2.15528
ENST00000222803.9:118-151	ENST00000222803.9	118	151	5	13	3	-3.16993
ENST00000222803.9:13-79	ENST00000222803.9	13	79	1	0	13	-4.5502
ENST00000222803.9:25-79	ENST00000222803.9	25	79	1	0	13	-4.5502
ENST00000222803.9:28-79	ENST00000222803.9	28	79	1	0	13	-4.5502
ENST00000222803.9:35-53	ENST00000222803.9	35	53	0	8	1	-3.77259
ENST00000222803.9:37-79	ENST00000222803.9	37	79	1	0	13	-4.5502
ENST00000222803.9:42-69	ENST00000222803.9	42	69	11	1	0	4.2854
ENST00000222803.9:6-69	ENST00000222803.9	6	69	12	1	0	4.42368
ENST00000222803.9:65-101	ENST00000222803.9	65	101	0	14	0	-4.85798
ENST00000222803.9:71-101	ENST00000222803.9	71	101	0	10	0	-4.39232
ENST00000222803.9:75-114	ENST00000222803.9	75	114	10	0	0	4.39232
ENST00000222803.9:84-114	ENST00000222803.9	84	114	9	0	0	4.24793
ENST00000222803.9:97-151	ENST00000222803.9	97	151	5	13	3	-3.16993
ENST00000222969.9:110-215	ENST00000222969.9	110	215	29	33	0	-5.01735
ENST00000222969.9:114-246	ENST00000222969.9	114	246	33	0	29	5.01735
ENST00000222969.9:118-166	ENST00000222969.9	118	166	0	29	23	-4.80934
ENST00000222969.9:137-215	ENST00000222969.9	137	215	29	29	0	4.90689
ENST00000222969.9:142-166	ENST00000222969.9	142	166	0	29	19	-4.81378
ENST00000222969.9:144-246	ENST00000222969.9	144	246	29	0	22	4.80432
ENST00000222969.9:155-215	ENST00000222969.9	155	215	22	26	0	-4.67243
ENST00000222969.9:162-246	ENST00000222969.9	162	246	18	0	1	5.05813
ENST00000222969.9:199-226	ENST00000222969.9	199	226	0	0	8	-4.08746
ENST00000222969.9:29-71	ENST00000222969.9	29	71	7	2	2	2.47131
ENST00000222969.9:31-166	ENST00000222969.9	31	166	2	36	29	-4.90042
ENST00000222969.9:42-114	ENST00000222969.9	42	114	6	2	7	-1.926
ENST00000222969.9:57-114	ENST00000222969.9	57	114	6	2	2	2.07039
ENST00000222969.9:63-114	ENST00000222969.9	63	114	6	2	2	2.07039
ENST00000222969.9:67-166	ENST00000222969.9	67	166	0	29	29	-4.90689
ENST00000222969.9:83-215	ENST00000222969.9	83	215	29	38	0	-5.18243
ENST00000222969.9:88-166	ENST00000222969.9	88	166	0	29	28	-4.88393
ENST00000222969.9:98-215	ENST00000222969.9	98	215	29	38	0	-5.18243
ENST00000223023.4:10-235	ENST00000223023.4	10	235	10	12	6	-1.58496
ENST00000223023.4:106-235	ENST00000223023.4	106	235	10	11	6	-1.35364
ENST00000223023.4:118-235	ENST00000223023.4	118	235	10	11	6	-1.35364
ENST00000223023.4:154-235	ENST00000223023.4	154	235	6	10	4	-1.926
ENST00000223023.4:172-235	ENST00000223023.4	172	235	6	10	4	-1.926
ENST00000223023.4:220-235	ENST00000223023.4	220	235	6	7	3	-1.39232
ENST00000223023.4:28-235	ENST00000223023.4	28	235	10	12	6	-1.58496
ENST00000223023.4:76-235	ENST00000223023.4	76	235	10	12	6	-1.58496
ENST00000223061.5:103-253	ENST00000223061.5	103	253	14	23	13	-2.21412
ENST00000223061.5:109-253	ENST00000223061.5	109	253	14	23	13	-2.21412
ENST00000223061.5:151-253	ENST00000223061.5	151	253	14	23	13	-2.21412
ENST00000223061.5:169-253	ENST00000223061.5	169	253	14	23	13	-2.21412
ENST00000223061.5:178-253	ENST00000223061.5	178	253	14	23	13	-2.21412
ENST00000223061.5:184-253	ENST00000223061.5	184	253	14	23	13	-2.21412
ENST00000223061.5:193-253	ENST00000223061.5	193	253	12	23	13	-2.49185
ENST00000223061.5:196-253	ENST00000223061.5	196	253	12	23	13	-2.49185
ENST00000223061.5:199-253	ENST00000223061.5	199	253	12	22	13	-2.28461
ENST00000223061.5:211-253	ENST00000223061.5	211	253	11	20	10	-2.44335
ENST00000223061.5:214-253	ENST00000223061.5	214	253	11	19	10	-2.21723
ENST00000223061.5:217-253	ENST00000223061.5	217	253	11	18	8	-2.39788
ENST00000223061.5:235-253	ENST00000223061.5	235	253	11	13	6	-1.848
ENST00000223061.5:238-253	ENST00000223061.5	238	253	11	13	6	-1.848
ENST00000223095.4:21-84	ENST00000223095.4	21	84	3	5	0	-2.52356
ENST00000223127.7:196-262	ENST00000223127.7	196	262	2	7	4	-1.97199
ENST00000223127.7:202-262	ENST00000223127.7	202	262	0	7	4	-2.94996
ENST00000223127.7:94-262	ENST00000223127.7	94	262	5	15	6	-3
ENST00000223136.4:1-49	ENST00000223136.4	1	49	40	685	80	-9.92849
ENST00000223136.4:28-49	ENST00000223136.4	28	49	40	685	79	-9.93236
ENST00000223136.4:35-56	ENST00000223136.4	35	56	684	71	34	9.98653
ENST00000223136.4:37-49	ENST00000223136.4	37	49	34	680	71	-9.97559
ENST00000223145.9:111-189	ENST00000223145.9	111	189	2	5	5	-1.32193
ENST00000223145.9:143-224	ENST00000223145.9	143	224	6	2	3	1.75002
ENST00000223145.9:149-224	ENST00000223145.9	149	224	6	2	3	1.75002
ENST00000223145.9:164-224	ENST00000223145.9	164	224	6	2	3	1.75002
ENST00000223145.9:176-224	ENST00000223145.9	176	224	3	2	3	0.321928
ENST00000223145.9:216-303	ENST00000223145.9	216	303	1	9	0	-3.96347
ENST00000223145.9:23-224	ENST00000223145.9	23	224	6	3	8	-1.6939
ENST00000223145.9:246-303	ENST00000223145.9	246	303	1	9	0	-3.96347
ENST00000223145.9:249-303	ENST00000223145.9	249	303	1	8	0	-3.77259
ENST00000223145.9:60-189	ENST00000223145.9	60	189	3	7	5	-1.37851
ENST00000224140.5:102-144	ENST00000224140.5	102	144	9	15	9	-1.66985
ENST00000224140.5:106-163	ENST00000224140.5	106	163	13	4	5	2.93289
ENST00000224140.5:116-134	ENST00000224140.5	116	134	4	4	1	1.58496
ENST00000224140.5:120-144	ENST00000224140.5	120	144	4	10	4	-2.32193
ENST00000224140.5:71-134	ENST00000224140.5	71	134	10	14	7	-1.76005
ENST00000224140.5:92-134	ENST00000224140.5	92	134	9	9	6	0.807355
ENST00000225171.6:11-77	ENST00000225171.6	11	77	3	21	49	-5.49711
ENST00000225171.6:15-66	ENST00000225171.6	15	66	21	49	2	-5.57238
ENST00000225171.6:17-77	ENST00000225171.6	17	77	3	21	49	-5.49711
ENST00000225171.6:45-66	ENST00000225171.6	45	66	21	49	0	-5.72247
ENST00000225171.6:47-77	ENST00000225171.6	47	77	1	20	30	-4.72952
ENST00000225171.6:54-66	ENST00000225171.6	54	66	19	30	0	-4.8681
ENST00000225171.6:57-66	ENST00000225171.6	57	66	10	17	0	-4.1062
ENST00000225174.7:14-26	ENST00000225174.7	14	26	13	1	0	4.5502
ENST00000225655.5:102-126	ENST00000225655.5	102	126	1	7	0	-3.55459
ENST00000225655.5:127-319	ENST00000225655.5	127	319	24	5	7	4.26053
ENST00000225655.5:136-319	ENST00000225655.5	136	319	24	5	7	4.26053
ENST00000225655.5:143-335	ENST00000225655.5	143	335	5	9	24	-4.074
ENST00000225655.5:156-435	ENST00000225655.5	156	435	9	33	7	-4.73512
ENST00000225655.5:180-435	ENST00000225655.5	180	435	9	33	7	-4.73512
ENST00000225655.5:192-435	ENST00000225655.5	192	435	9	31	7	-4.56305
ENST00000225655.5:210-435	ENST00000225655.5	210	435	7	30	7	-4.64648
ENST00000225655.5:224-335	ENST00000225655.5	224	335	5	7	15	-2.85244
ENST00000225655.5:231-435	ENST00000225655.5	231	435	7	24	7	-4.01886
ENST00000225655.5:279-435	ENST00000225655.5	279	435	3	24	7	-4.51987
ENST00000225655.5:284-335	ENST00000225655.5	284	335	5	3	14	-3.37346
ENST00000225655.5:337-427	ENST00000225655.5	337	427	8	2	0	3.51096
ENST00000225655.5:343-427	ENST00000225655.5	343	427	8	2	0	3.51096
ENST00000225655.5:355-427	ENST00000225655.5	355	427	5	2	0	2.6845
ENST00000225655.5:364-427	ENST00000225655.5	364	427	4	1	0	2.63227
ENST00000225655.5:387-435	ENST00000225655.5	387	435	0	3	1	-2.16993
ENST00000225655.5:417-435	ENST00000225655.5	417	435	0	3	1	-2.16993
ENST00000225655.5:71-134	ENST00000225655.5	71	134	0	1	7	-3.55459
ENST00000225972.7:121-163	ENST00000225972.7	121	163	0	10	0	-4.39232
ENST00000225972.7:144-168	ENST00000225972.7	144	168	2	0	10	-3.90689
ENST00000225972.7:148-163	ENST00000225972.7	148	163	0	8	0	-4.08746
ENST00000225972.7:19-163	ENST00000225972.7	19	163	0	10	2	-3.90689
ENST00000225972.7:22-163	ENST00000225972.7	22	163	0	10	2	-3.90689
ENST00000225972.7:24-168	ENST00000225972.7	24	168	4	0	12	-3.90689
ENST00000225972.7:30-168	ENST00000225972.7	30	168	4	0	12	-3.90689
ENST00000225972.7:36-168	ENST00000225972.7	36	168	4	0	12	-3.90689
ENST00000225972.7:57-168	ENST00000225972.7	57	168	3	0	12	-4.05311
ENST00000225972.7:6-168	ENST00000225972.7	6	168	4	0	12	-3.90689
ENST00000225972.7:82-163	ENST00000225972.7	82	163	0	10	1	-4.13303
ENST00000226225.6:11-53	ENST00000226225.6	11	53	0	29	3	-5.60548
ENST00000226225.6:114-159	ENST00000226225.6	114	159	9	10	7	-0.621488
ENST00000226225.6:126-159	ENST00000226225.6	126	159	8	9	4	-1.58496
ENST00000226225.6:36-75	ENST00000226225.6	36	75	32	5	0	5.6163
ENST00000226225.6:47-53	ENST00000226225.6	47	53	0	29	2	-5.69416
ENST00000226225.6:49-97	ENST00000226225.6	49	97	4	0	3	2.23704
ENST00000226225.6:6-75	ENST00000226225.6	6	75	32	5	0	5.6163
ENST00000226225.6:62-167	ENST00000226225.6	62	167	7	9	12	-1.23704
ENST00000226225.6:68-167	ENST00000226225.6	68	167	7	9	11	-0.917538
ENST00000226225.6:71-167	ENST00000226225.6	71	167	7	9	10	-0.621488
ENST00000226225.6:86-167	ENST00000226225.6	86	167	7	9	10	-0.621488
ENST00000226522.8:4-55	ENST00000226522.8	4	55	0	5	3	-2.52356
ENST00000226796.6:100-148	ENST00000226796.6	100	148	2	2	2	0
ENST00000226796.6:64-100	ENST00000226796.6	64	100	13	5	0	3.9386
ENST00000226796.6:69-171	ENST00000226796.6	69	171	2	16	6	-3.80735
ENST00000226796.6:78-171	ENST00000226796.6	78	171	2	13	6	-3.30117
ENST00000226796.6:81-171	ENST00000226796.6	81	171	2	13	6	-3.30117
ENST00000226796.6:96-171	ENST00000226796.6	96	171	2	3	2	-0.36257
ENST00000227524.8:25-58	ENST00000227524.8	25	58	14	1	0	4.66676
ENST00000227525.7:146-215	ENST00000227525.7	146	215	13	9	1	3.42481
ENST00000227525.7:149-215	ENST00000227525.7	149	215	13	9	1	3.42481
ENST00000227525.7:178-259	ENST00000227525.7	178	259	1	12	10	-3.31564
ENST00000227525.7:184-259	ENST00000227525.7	184	259	1	12	10	-3.31564
ENST00000227525.7:188-215	ENST00000227525.7	188	215	10	7	1	3
ENST00000227525.7:190-259	ENST00000227525.7	190	259	1	12	8	-3.30117
ENST00000227525.7:206-215	ENST00000227525.7	206	215	10	7	1	3
ENST00000227525.7:26-215	ENST00000227525.7	26	215	14	14	2	3.40599
ENST00000227525.7:292-313	ENST00000227525.7	292	313	8	1	6	2.63227
ENST00000227525.7:298-313	ENST00000227525.7	298	313	8	1	1	3.43296
ENST00000227525.7:327-372	ENST00000227525.7	327	372	3	3	0	2
ENST00000227525.7:340-379	ENST00000227525.7	340	379	9	0	3	3.52356
ENST00000227525.7:343-379	ENST00000227525.7	343	379	9	0	3	3.52356
ENST00000227525.7:366-372	ENST00000227525.7	366	372	3	1	0	2.16993
ENST00000227525.7:381-390	ENST00000227525.7	381	390	7	47	0	-6.1788
ENST00000227638.7:118-337	ENST00000227638.7	118	337	5	9	2	-2.49185
ENST00000227638.7:31-337	ENST00000227638.7	31	337	8	9	2	-2.46632
ENST00000228136.8:121-310	ENST00000228136.8	121	310	2	4	0	-2.32193
ENST00000228136.8:142-310	ENST00000228136.8	142	310	2	4	0	-2.32193
ENST00000228136.8:229-310	ENST00000228136.8	229	310	2	4	0	-2.32193
ENST00000228136.8:232-310	ENST00000228136.8	232	310	2	4	0	-2.32193
ENST00000228136.8:235-310	ENST00000228136.8	235	310	2	4	0	-2.32193
ENST00000228437.9:103-379	ENST00000228437.9	103	379	7	5	41	-5.56498
ENST00000228437.9:152-365	ENST00000228437.9	152	365	5	41	6	-5.62936
ENST00000228437.9:16-379	ENST00000228437.9	16	379	7	8	41	-5.36132
ENST00000228437.9:167-365	ENST00000228437.9	167	365	4	27	6	-4.77211
ENST00000228437.9:197-365	ENST00000228437.9	197	365	4	27	6	-4.77211
ENST00000228437.9:205-379	ENST00000228437.9	205	379	6	4	27	-4.77211
ENST00000228437.9:230-365	ENST00000228437.9	230	365	4	26	6	-4.68182
ENST00000228437.9:248-365	ENST00000228437.9	248	365	3	10	2	-3.10434
ENST00000228437.9:73-379	ENST00000228437.9	73	379	7	6	41	-5.49541
ENST00000228438.2:494-593	ENST00000228438.2	494	593	1	6	4	-2.15528
ENST00000228438.2:506-593	ENST00000228438.2	506	593	1	6	4	-2.15528
ENST00000228438.2:523-580	ENST00000228438.2	523	580	4	1	6	-2.15528
ENST00000228438.2:527-593	ENST00000228438.2	527	593	1	6	4	-2.15528
ENST00000228438.2:796-922	ENST00000228438.2	796	922	55	62	89	-3.37689
ENST00000228438.2:802-922	ENST00000228438.2	802	922	55	58	87	-3.37434
ENST00000228438.2:804-813	ENST00000228438.2	804	813	10	24	3	-4.2884
ENST00000228438.2:807-813	ENST00000228438.2	807	813	9	19	0	-4.34746
ENST00000228438.2:859-922	ENST00000228438.2	859	922	27	41	77	-4.83446
ENST00000228438.2:872-899	ENST00000228438.2	872	899	27	73	17	-5.5467
ENST00000228438.2:881-899	ENST00000228438.2	881	899	16	73	17	-5.93653
ENST00000228438.2:892-922	ENST00000228438.2	892	922	6	5	28	-4.75489
ENST00000228506.7:284-359	ENST00000228506.7	284	359	9	28	7	-4.27189
ENST00000228506.7:311-359	ENST00000228506.7	311	359	8	28	5	-4.57761
ENST00000228506.7:341-359	ENST00000228506.7	341	359	3	5	4	-0.584963
ENST00000228515.5:17-233	ENST00000228515.5	17	233	0	3	7	-3.07039
ENST00000228515.5:198-243	ENST00000228515.5	198	243	2	7	0	-3.27302
ENST00000228515.5:219-243	ENST00000228515.5	219	243	0	7	0	-3.90689
ENST00000228515.5:31-220	ENST00000228515.5	31	220	4	0	3	2.23704
ENST00000228515.5:35-233	ENST00000228515.5	35	233	0	3	7	-3.07039
ENST00000228515.5:47-233	ENST00000228515.5	47	233	0	3	7	-3.07039
ENST00000228515.5:8-233	ENST00000228515.5	8	233	0	3	7	-3.07039
ENST00000228740.6:107-113	ENST00000228740.6	107	113	1	40	0	-6.26953
ENST00000228740.6:20-95	ENST00000228740.6	20	95	2	8	1	-3.14048
ENST00000228740.6:82-130	ENST00000228740.6	82	130	3	3	53	-6.42199
ENST00000228740.6:88-130	ENST00000228740.6	88	130	3	2	47	-6.27039
ENST00000228740.6:95-113	ENST00000228740.6	95	113	1	40	0	-6.26953
ENST00000228865.2:25-157	ENST00000228865.2	25	157	6	2	3	1.75002
ENST00000228865.2:30-108	ENST00000228865.2	30	108	3	6	2	-1.75002
ENST00000228872.8:197-287	ENST00000228872.8	197	287	1	5	0	-3
ENST00000228872.8:311-644	ENST00000228872.8	311	644	52	52	19	4.22553
ENST00000228872.8:330-678	ENST00000228872.8	330	678	52	19	52	4.22553
ENST00000228872.8:340-502	ENST00000228872.8	340	502	13	35	11	-4.2505
ENST00000228872.8:346-502	ENST00000228872.8	346	502	13	35	11	-4.2505
ENST00000228872.8:352-502	ENST00000228872.8	352	502	13	31	11	-3.83151
ENST00000228872.8:363-678	ENST00000228872.8	363	678	52	18	43	4.12746
ENST00000228872.8:376-502	ENST00000228872.8	376	502	8	24	11	-3.47158
ENST00000228872.8:387-678	ENST00000228872.8	387	678	52	14	41	4.48795
ENST00000228872.8:410-644	ENST00000228872.8	410	644	40	52	12	-4.6615
ENST00000228872.8:430-502	ENST00000228872.8	430	502	6	21	11	-3.35199
ENST00000228872.8:437-644	ENST00000228872.8	437	644	36	52	12	-4.66221
ENST00000228872.8:453-678	ENST00000228872.8	453	678	51	12	35	4.61651
ENST00000228872.8:457-502	ENST00000228872.8	457	502	6	18	10	-2.92376
ENST00000228872.8:498-678	ENST00000228872.8	498	678	51	9	17	5.313
ENST00000228872.8:545-644	ENST00000228872.8	545	644	17	41	4	-5.13327
ENST00000228872.8:569-644	ENST00000228872.8	569	644	15	41	4	-5.21335
ENST00000228872.8:584-644	ENST00000228872.8	584	644	10	15	4	-2.86312
ENST00000228872.8:593-644	ENST00000228872.8	593	644	8	15	4	-2.97982
ENST00000228872.8:612-678	ENST00000228872.8	612	678	11	2	0	4.07435
ENST00000229030.4:123-444	ENST00000229030.4	123	444	5	12	6	-2.24462
ENST00000229030.4:201-444	ENST00000229030.4	201	444	5	9	5	-1.4245
ENST00000229030.4:261-444	ENST00000229030.4	261	444	5	9	5	-1.4245
ENST00000229265.10:15-87	ENST00000229265.10	15	87	0	3	1	-2.16993
ENST00000229390.7:31-88	ENST00000229390.7	31	88	15	103	10	-7.01419
ENST00000229390.7:73-88	ENST00000229390.7	73	88	15	103	10	-7.01419
ENST00000229390.7:78-132	ENST00000229390.7	78	132	1	14	60	-6.28318
ENST00000229390.7:84-132	ENST00000229390.7	84	132	1	14	5	-3.83794
ENST00000229416.10:157-412	ENST00000229416.10	157	412	3	5	1	-1.87447
ENST00000229416.10:295-412	ENST00000229416.10	295	412	1	3	1	-1.37851
ENST00000229416.10:7-412	ENST00000229416.10	7	412	6	5	11	-1.93289
ENST00000229563.5:100-262	ENST00000229563.5	100	262	10	8	4	1.82597
ENST00000229563.5:123-243	ENST00000229563.5	123	243	1	10	5	-3.10852
ENST00000229563.5:172-262	ENST00000229563.5	172	262	5	7	3	-1.37851
ENST00000229563.5:189-243	ENST00000229563.5	189	243	0	5	4	-2.5025
ENST00000229563.5:227-284	ENST00000229563.5	227	284	15	27	50	-4.43499
ENST00000229563.5:275-284	ENST00000229563.5	275	284	12	22	19	-1.99318
ENST00000229563.5:42-243	ENST00000229563.5	42	243	3	12	6	-2.80735
ENST00000229563.5:63-243	ENST00000229563.5	63	243	3	10	6	-2.29123
ENST00000229595.5:22-43	ENST00000229595.5	22	43	8	11	2	-2.80735
ENST00000229633.6:113-155	ENST00000229633.6	113	155	1	14	1	-4.46761
ENST00000229633.6:122-155	ENST00000229633.6	122	155	1	14	1	-4.46761
ENST00000229633.6:26-155	ENST00000229633.6	26	155	1	14	8	-3.59018
ENST00000229633.6:7-112	ENST00000229633.6	7	112	7	0	0	3.90689
ENST00000229633.6:98-155	ENST00000229633.6	98	155	1	14	4	-3.96639
ENST00000229794.8:101-107	ENST00000229794.8	101	107	1	6	2	-2.5025
ENST00000229794.8:14-107	ENST00000229794.8	14	107	1	6	2	-2.5025
ENST00000229794.8:17-107	ENST00000229794.8	17	107	1	6	2	-2.5025
ENST00000229794.8:63-147	ENST00000229794.8	63	147	9	3	3	2.53605
ENST00000229794.8:68-107	ENST00000229794.8	68	107	1	6	2	-2.5025
ENST00000229794.8:77-107	ENST00000229794.8	77	107	1	6	2	-2.5025
ENST00000230048.4:7-124	ENST00000230048.4	7	124	2	7	10	-2.62244
ENST00000230056.7:104-179	ENST00000230056.7	104	179	0	10	0	-4.39232
ENST00000230056.7:140-179	ENST00000230056.7	140	179	0	10	0	-4.39232
ENST00000230056.7:158-179	ENST00000230056.7	158	179	0	10	0	-4.39232
ENST00000230056.7:53-179	ENST00000230056.7	53	179	0	10	0	-4.39232
ENST00000230056.7:83-179	ENST00000230056.7	83	179	0	10	0	-4.39232
ENST00000230340.8:15-216	ENST00000230340.8	15	216	0	5	2	-2.6845
ENST00000230340.8:18-216	ENST00000230340.8	18	216	0	5	2	-2.6845
ENST00000230340.8:27-216	ENST00000230340.8	27	216	0	5	2	-2.6845
ENST00000230340.8:37-112	ENST00000230340.8	37	112	1	2	0	-1.58496
ENST00000230340.8:81-216	ENST00000230340.8	81	216	0	5	2	-2.6845
ENST00000230340.8:85-112	ENST00000230340.8	85	112	1	2	0	-1.58496
ENST00000230640.9:12-177	ENST00000230640.9	12	177	2	2	5	-1.58496
ENST00000230640.9:134-224	ENST00000230640.9	134	224	3	6	4	-1.05445
ENST00000230640.9:170-224	ENST00000230640.9	170	224	2	5	4	-1.18442
ENST00000230640.9:173-224	ENST00000230640.9	173	224	2	5	3	-1.26303
ENST00000230640.9:188-224	ENST00000230640.9	188	224	0	3	3	-2
ENST00000230640.9:194-224	ENST00000230640.9	194	224	0	3	3	-2
ENST00000230640.9:24-177	ENST00000230640.9	24	177	2	2	5	-1.58496
ENST00000230859.7:514-811	ENST00000230859.7	514	811	9	1	1	3.65951
ENST00000231238.9:20-77	ENST00000231238.9	20	77	9	2	5	2.49185
ENST00000231238.9:71-77	ENST00000231238.9	71	77	9	0	2	3.72048
ENST00000231368.9:194-344	ENST00000231368.9	194	344	2	3	1	-1
ENST00000231368.9:208-352	ENST00000231368.9	208	352	1	2	3	-1
ENST00000231368.9:217-352	ENST00000231368.9	217	352	1	2	3	-1
ENST00000231368.9:229-352	ENST00000231368.9	229	352	1	1	3	-1.37851
ENST00000231368.9:245-344	ENST00000231368.9	245	344	1	3	1	-1.37851
ENST00000231368.9:269-344	ENST00000231368.9	269	344	1	2	1	-0.584963
ENST00000231368.9:73-352	ENST00000231368.9	73	352	1	3	3	-1.09954
ENST00000231498.7:55-115	ENST00000231498.7	55	115	3	4	4	-0.241008
ENST00000231498.7:73-115	ENST00000231498.7	73	115	3	3	4	-0.263034
ENST00000232496.4:12-102	ENST00000232496.4	12	102	1	29	4	-5.41636
ENST00000232496.4:66-102	ENST00000232496.4	66	102	1	29	4	-5.41636
ENST00000232496.4:78-102	ENST00000232496.4	78	102	1	29	4	-5.41636
ENST00000232496.4:84-102	ENST00000232496.4	84	102	1	29	4	-5.41636
ENST00000232508.9:151-220	ENST00000232508.9	151	220	1	5	1	-2.47805
ENST00000232508.9:19-220	ENST00000232508.9	19	220	2	5	1	-2.08746
ENST00000232508.9:61-220	ENST00000232508.9	61	220	2	5	1	-2.08746
ENST00000233072.9:159-165	ENST00000233072.9	159	165	0	11	0	-4.52356
ENST00000233072.9:20-125	ENST00000233072.9	20	125	1	17	1	-4.80464
ENST00000233072.9:26-125	ENST00000233072.9	26	125	1	17	1	-4.80464
ENST00000233072.9:47-125	ENST00000233072.9	47	125	1	17	1	-4.80464
ENST00000233072.9:51-87	ENST00000233072.9	51	87	13	0	0	4.75489
ENST00000233072.9:94-154	ENST00000233072.9	94	154	2	3	4	-0.736966
ENST00000233084.7:197-311	ENST00000233084.7	197	311	6	1	3	2.26303
ENST00000233084.7:212-311	ENST00000233084.7	212	311	6	1	3	2.26303
ENST00000233084.7:248-311	ENST00000233084.7	248	311	6	1	3	2.26303
ENST00000233143.5:36-105	ENST00000233143.5	36	105	304	575	487	-6.40852
ENST00000233143.5:39-105	ENST00000233143.5	39	105	304	575	487	-6.40852
ENST00000233143.5:81-105	ENST00000233143.5	81	105	111	493	198	-8.23313
ENST00000233143.5:87-105	ENST00000233143.5	87	105	107	475	186	-8.20071
ENST00000233143.5:96-105	ENST00000233143.5	96	105	72	394	59	-8.68852
ENST00000233330.6:125-311	ENST00000233330.6	125	311	1	3	5	-1.87447
ENST00000233330.6:176-311	ENST00000233330.6	176	311	1	3	5	-1.87447
ENST00000233468.4:115-136	ENST00000233468.4	115	136	31	53	8	-5.08838
ENST00000233468.4:118-136	ENST00000233468.4	118	136	31	48	8	-4.84765
ENST00000233468.4:121-136	ENST00000233468.4	121	136	31	47	8	-4.79774
ENST00000233468.4:140-146	ENST00000233468.4	140	146	7	9	0	-3.22882
ENST00000233468.4:184-196	ENST00000233468.4	184	196	36	3	7	5.43644
ENST00000233468.4:52-136	ENST00000233468.4	52	136	37	55	9	-5.04093
ENST00000233575.6:117-147	ENST00000233575.6	117	147	48	163	5	-7.54196
ENST00000233575.6:124-217	ENST00000233575.6	124	217	32	2	16	4.80941
ENST00000233575.6:130-217	ENST00000233575.6	130	217	14	2	16	-3.55459
ENST00000233575.6:21-147	ENST00000233575.6	21	147	48	164	14	-7.36818
ENST00000233575.6:47-128	ENST00000233575.6	47	128	12	32	150	-7.43463
ENST00000233575.6:59-128	ENST00000233575.6	59	128	12	32	150	-7.43463
ENST00000233575.6:75-147	ENST00000233575.6	75	147	48	164	14	-7.36818
ENST00000233615.6:102-156	ENST00000233615.6	102	156	11	21	5	-3.53538
ENST00000233615.6:113-266	ENST00000233615.6	113	266	6	31	24	-4.11775
ENST00000233615.6:116-266	ENST00000233615.6	116	266	6	31	24	-4.11775
ENST00000233615.6:132-156	ENST00000233615.6	132	156	11	21	5	-3.53538
ENST00000233615.6:152-266	ENST00000233615.6	152	266	1	21	3	-4.91265
ENST00000233615.6:155-266	ENST00000233615.6	155	266	1	20	3	-4.82018
ENST00000233615.6:158-266	ENST00000233615.6	158	266	1	20	3	-4.82018
ENST00000233615.6:173-266	ENST00000233615.6	173	266	1	8	1	-3.43296
ENST00000233615.6:191-266	ENST00000233615.6	191	266	1	8	1	-3.43296
ENST00000233615.6:197-266	ENST00000233615.6	197	266	1	8	1	-3.43296
ENST00000233615.6:209-266	ENST00000233615.6	209	266	1	8	1	-3.43296
ENST00000233615.6:227-266	ENST00000233615.6	227	266	1	7	0	-3.55459
ENST00000233615.6:245-266	ENST00000233615.6	245	266	1	7	0	-3.55459
ENST00000233615.6:84-156	ENST00000233615.6	84	156	11	21	5	-3.53538
ENST00000233893.9:16-157	ENST00000233893.9	16	157	3	8	0	-3.30875
ENST00000234111.8:1-154	ENST00000234111.8	1	154	14	35	2	-5.07996
ENST00000234111.8:100-154	ENST00000234111.8	100	154	14	35	2	-5.07996
ENST00000234111.8:109-154	ENST00000234111.8	109	154	14	33	2	-4.95039
ENST00000234111.8:114-150	ENST00000234111.8	114	150	2	13	33	-4.99435
ENST00000234111.8:117-150	ENST00000234111.8	117	150	2	13	33	-4.99435
ENST00000234111.8:127-154	ENST00000234111.8	127	154	14	33	1	-5.0607
ENST00000234111.8:162-450	ENST00000234111.8	162	450	221	58	93	6.90398
ENST00000234111.8:221-383	ENST00000234111.8	221	383	90	212	49	-6.9529
ENST00000234111.8:279-450	ENST00000234111.8	279	450	216	50	91	6.98486
ENST00000234111.8:282-450	ENST00000234111.8	282	450	216	50	91	6.98486
ENST00000234111.8:311-383	ENST00000234111.8	311	383	87	209	46	-6.99008
ENST00000234111.8:317-383	ENST00000234111.8	317	383	87	205	46	-6.93032
ENST00000234111.8:338-383	ENST00000234111.8	338	383	86	193	46	-6.75007
ENST00000234111.8:350-383	ENST00000234111.8	350	383	86	181	43	-6.60747
ENST00000234111.8:356-383	ENST00000234111.8	356	383	45	26	2	5.29147
ENST00000234111.8:361-496	ENST00000234111.8	361	496	5	47	31	-5.06531
ENST00000234111.8:370-496	ENST00000234111.8	370	496	5	43	21	-5.02911
ENST00000234111.8:379-496	ENST00000234111.8	379	496	3	3	5	-0.788496
ENST00000234111.8:385-496	ENST00000234111.8	385	496	3	2	5	-1.26303
ENST00000234111.8:391-496	ENST00000234111.8	391	496	3	1	5	-1.87447
ENST00000234111.8:79-154	ENST00000234111.8	79	154	14	35	2	-5.07996
ENST00000234296.6:0-189	ENST00000234296.6	0	189	24	25	19	-0.934905
ENST00000234296.6:153-189	ENST00000234296.6	153	189	18	16	7	2.59082
ENST00000234296.6:156-189	ENST00000234296.6	156	189	18	16	7	2.59082
ENST00000234296.6:177-189	ENST00000234296.6	177	189	2	9	0	-3.72048
ENST00000234296.6:195-237	ENST00000234296.6	195	237	17	0	0	5.12928
ENST00000234296.6:39-189	ENST00000234296.6	39	189	24	25	19	-0.934905
ENST00000234296.6:57-189	ENST00000234296.6	57	189	24	25	19	-0.934905
ENST00000234296.6:7-157	ENST00000234296.6	7	157	9	12	6	-1.58496
ENST00000234296.6:75-189	ENST00000234296.6	75	189	24	25	19	-0.934905
ENST00000234296.6:82-157	ENST00000234296.6	82	157	9	12	6	-1.58496
ENST00000234310.7:10-190	ENST00000234310.7	10	190	7	8	11	-1
ENST00000234310.7:127-190	ENST00000234310.7	127	190	5	1	9	-2.88753
ENST00000234310.7:136-190	ENST00000234310.7	136	190	3	1	9	-3.16993
ENST00000234310.7:149-350	ENST00000234310.7	149	350	4	9	5	-1.73697
ENST00000234310.7:35-350	ENST00000234310.7	35	350	11	11	9	0.331206
ENST00000234310.7:4-190	ENST00000234310.7	4	190	7	8	11	-1
ENST00000234310.7:46-190	ENST00000234310.7	46	190	7	8	11	-1
ENST00000234310.7:69-177	ENST00000234310.7	69	177	10	5	0	3.45943
ENST00000234453.9:100-244	ENST00000234453.9	100	244	11	3	1	3.60881
ENST00000234453.9:19-244	ENST00000234453.9	19	244	11	5	1	3.31342
ENST00000234453.9:7-244	ENST00000234453.9	7	244	11	5	1	3.31342
ENST00000234590.8:9-90	ENST00000234590.8	9	90	263	58	164	7.0337
ENST00000234590.8:93-111	ENST00000234590.8	93	111	96	394	390	-7.64497
ENST00000234677.6:19-52	ENST00000234677.6	19	52	2	6	4	-1.58496
ENST00000234739.7:316-415	ENST00000234739.7	316	415	9	2	4	2.63227
ENST00000234739.7:320-395	ENST00000234739.7	320	395	1	4	9	-3
ENST00000234739.7:324-369	ENST00000234739.7	324	369	4	9	1	-3
ENST00000234739.7:340-415	ENST00000234739.7	340	415	9	2	4	2.63227
ENST00000234739.7:355-415	ENST00000234739.7	355	415	9	2	4	2.63227
ENST00000234739.7:363-369	ENST00000234739.7	363	369	4	9	1	-3
ENST00000234739.7:453-717	ENST00000234739.7	453	717	4	1	8	-2.7425
ENST00000234739.7:463-700	ENST00000234739.7	463	700	1	5	4	-1.848
ENST00000234739.7:478-700	ENST00000234739.7	478	700	1	5	4	-1.848
ENST00000234739.7:487-700	ENST00000234739.7	487	700	1	5	4	-1.848
ENST00000234739.7:493-700	ENST00000234739.7	493	700	1	5	4	-1.848
ENST00000234739.7:508-700	ENST00000234739.7	508	700	1	5	4	-1.848
ENST00000234739.7:523-700	ENST00000234739.7	523	700	1	5	4	-1.848
ENST00000234739.7:639-717	ENST00000234739.7	639	717	0	1	6	-3.30117
ENST00000234739.7:666-717	ENST00000234739.7	666	717	0	1	6	-3.30117
ENST00000234739.7:672-717	ENST00000234739.7	672	717	0	1	6	-3.30117
ENST00000234739.7:675-717	ENST00000234739.7	675	717	0	1	6	-3.30117
ENST00000235090.9:12-180	ENST00000235090.9	12	180	5	4	2	1.18442
ENST00000235090.9:27-180	ENST00000235090.9	27	180	5	4	2	1.18442
ENST00000235090.9:9-180	ENST00000235090.9	9	180	5	4	2	1.18442
ENST00000236051.2:113-119	ENST00000236051.2	113	119	4	45	5	-5.94902
ENST00000236051.2:13-46	ENST00000236051.2	13	46	3	7	5	-1.37851
ENST00000236051.2:23-38	ENST00000236051.2	23	38	2	2	3	-0.36257
ENST00000236051.2:8-38	ENST00000236051.2	8	38	7	5	3	1.37851
ENST00000236051.2:86-119	ENST00000236051.2	86	119	9	69	13	-6.23262
ENST00000236067.8:108-168	ENST00000236067.8	108	168	12	22	3	-3.96797
ENST00000236067.8:129-168	ENST00000236067.8	129	168	12	22	3	-3.96797
ENST00000236067.8:15-168	ENST00000236067.8	15	168	12	22	3	-3.96797
ENST00000236067.8:150-168	ENST00000236067.8	150	168	10	22	3	-4.07284
ENST00000236067.8:156-168	ENST00000236067.8	156	168	10	22	3	-4.07284
ENST00000236067.8:33-168	ENST00000236067.8	33	168	12	22	3	-3.96797
ENST00000236067.8:36-168	ENST00000236067.8	36	168	12	22	3	-3.96797
ENST00000236067.8:93-168	ENST00000236067.8	93	168	12	22	3	-3.96797
ENST00000236067.8:96-168	ENST00000236067.8	96	168	12	22	3	-3.96797
ENST00000236980.10:258-297	ENST00000236980.10	258	297	2	8	1	-3.14048
ENST00000236980.10:288-297	ENST00000236980.10	288	297	2	5	0	-2.6845
ENST00000237281.4:18-120	ENST00000237281.4	18	120	0	2	7	-3.27302
ENST00000237281.4:57-120	ENST00000237281.4	57	120	0	2	6	-3
ENST00000237455.4:20-149	ENST00000237455.4	20	149	1	3	2	-1
ENST00000237455.4:27-126	ENST00000237455.4	27	126	3	2	1	1
ENST00000237455.4:31-265	ENST00000237455.4	31	265	3	2	7	-2.16993
ENST00000237455.4:33-126	ENST00000237455.4	33	126	3	2	1	1
ENST00000237455.4:42-126	ENST00000237455.4	42	126	3	0	1	2.16993
ENST00000237455.4:61-265	ENST00000237455.4	61	265	1	2	7	-2.848
ENST00000237455.4:70-265	ENST00000237455.4	70	265	1	2	7	-2.848
ENST00000237455.4:73-265	ENST00000237455.4	73	265	1	2	7	-2.848
ENST00000237455.4:79-265	ENST00000237455.4	79	265	1	1	7	-3.16993
ENST00000237500.9:104-335	ENST00000237500.9	104	335	11	16	66	-5.92309
ENST00000237500.9:155-335	ENST00000237500.9	155	335	11	16	66	-5.92309
ENST00000237500.9:176-335	ENST00000237500.9	176	335	11	16	66	-5.92309
ENST00000237500.9:188-335	ENST00000237500.9	188	335	11	16	66	-5.92309
ENST00000237500.9:200-335	ENST00000237500.9	200	335	11	16	66	-5.92309
ENST00000237500.9:233-335	ENST00000237500.9	233	335	11	16	66	-5.92309
ENST00000237500.9:248-335	ENST00000237500.9	248	335	11	15	65	-5.92344
ENST00000237500.9:266-335	ENST00000237500.9	266	335	11	15	65	-5.92344
ENST00000237500.9:65-335	ENST00000237500.9	65	335	11	16	66	-5.92309
ENST00000237612.7:475-535	ENST00000237612.7	475	535	0	5	0	-3.45943
ENST00000237654.8:221-296	ENST00000237654.8	221	296	30	13	11	3.71272
ENST00000237654.8:286-304	ENST00000237654.8	286	304	4	33	1	-5.65294
ENST00000237654.8:44-296	ENST00000237654.8	44	296	54	18	19	4.8437
ENST00000237654.8:58-304	ENST00000237654.8	58	304	19	76	18	-5.89557
ENST00000237853.8:144-309	ENST00000237853.8	144	309	9	3	2	2.8365
ENST00000237853.8:225-309	ENST00000237853.8	225	309	9	2	2	3.09398
ENST00000237853.8:233-257	ENST00000237853.8	233	257	2	5	0	-2.6845
ENST00000238081.7:66-72	ENST00000238081.7	66	72	3	4	2	-0.736966
ENST00000238112.7:106-154	ENST00000238112.7	106	154	11	19	2	-3.86419
ENST00000238112.7:133-154	ENST00000238112.7	133	154	9	11	0	-3.49825
ENST00000238112.7:139-154	ENST00000238112.7	139	154	6	11	0	-3.54916
ENST00000238647.4:102-150	ENST00000238647.4	102	150	1	21	3	-4.91265
ENST00000238647.4:146-692	ENST00000238647.4	146	692	5	8	2	-2.20163
ENST00000238647.4:204-468	ENST00000238647.4	204	468	1	0	2	-1.58496
ENST00000238647.4:212-692	ENST00000238647.4	212	692	5	7	2	-1.89308
ENST00000238647.4:227-692	ENST00000238647.4	227	692	5	7	2	-1.89308
ENST00000238647.4:242-692	ENST00000238647.4	242	692	5	7	2	-1.89308
ENST00000238647.4:251-692	ENST00000238647.4	251	692	4	7	2	-1.97199
ENST00000238647.4:275-692	ENST00000238647.4	275	692	4	7	2	-1.97199
ENST00000238647.4:30-54	ENST00000238647.4	30	54	3	1	3	1.09954
ENST00000238647.4:308-692	ENST00000238647.4	308	692	4	7	2	-1.97199
ENST00000238647.4:311-692	ENST00000238647.4	311	692	4	7	2	-1.97199
ENST00000238647.4:455-692	ENST00000238647.4	455	692	3	6	2	-1.75002
ENST00000238647.4:512-692	ENST00000238647.4	512	692	3	5	0	-2.52356
ENST00000238647.4:548-692	ENST00000238647.4	548	692	3	5	0	-2.52356
ENST00000238647.4:649-667	ENST00000238647.4	649	667	0	3	2	-1.926
ENST00000238647.4:82-415	ENST00000238647.4	82	415	25	9	1	4.73335
ENST00000238647.4:88-415	ENST00000238647.4	88	415	24	9	1	4.64725
ENST00000238651.9:34-97	ENST00000238651.9	34	97	1	4	0	-2.63227
ENST00000238651.9:74-131	ENST00000238651.9	74	131	1	4	0	-2.63227
ENST00000238651.9:89-131	ENST00000238651.9	89	131	1	4	0	-2.63227
ENST00000238714.7:102-156	ENST00000238714.7	102	156	0	2	21	-5.17167
ENST00000238714.7:106-121	ENST00000238714.7	106	121	1	21	0	-5.29546
ENST00000238714.7:7-121	ENST00000238714.7	7	121	1	21	0	-5.29546
ENST00000238714.7:80-173	ENST00000238714.7	80	173	21	0	2	5.17167
ENST00000238714.7:82-121	ENST00000238714.7	82	121	1	21	0	-5.29546
ENST00000238714.7:85-121	ENST00000238714.7	85	121	1	21	0	-5.29546
ENST00000238738.8:8-260	ENST00000238738.8	8	260	1	8	0	-3.77259
ENST00000238789.9:1-91	ENST00000238789.9	1	91	3	2	0	1.926
ENST00000238789.9:24-276	ENST00000238789.9	24	276	0	3	2	-1.926
ENST00000238831.8:3-72	ENST00000238831.8	3	72	12	18	0	-4.15381
ENST00000238831.8:39-72	ENST00000238831.8	39	72	10	12	0	-3.61738
ENST00000238831.8:60-72	ENST00000238831.8	60	72	0	5	0	-3.45943
ENST00000238831.8:63-72	ENST00000238831.8	63	72	0	5	0	-3.45943
ENST00000238831.8:9-72	ENST00000238831.8	9	72	12	18	0	-4.15381
ENST00000238856.8:115-232	ENST00000238856.8	115	232	3	3	1	1.09954
ENST00000238856.8:140-191	ENST00000238856.8	140	191	2	1	2	0.485427
ENST00000238856.8:152-191	ENST00000238856.8	152	191	2	1	2	0.485427
ENST00000238856.8:162-180	ENST00000238856.8	162	180	1	2	2	-0.485427
ENST00000238856.8:28-232	ENST00000238856.8	28	232	3	3	1	1.09954
ENST00000238856.8:31-232	ENST00000238856.8	31	232	3	3	1	1.09954
ENST00000238856.8:43-232	ENST00000238856.8	43	232	3	3	1	1.09954
ENST00000238892.3:67-112	ENST00000238892.3	67	112	14	11	4	2.68891
ENST00000238892.3:70-112	ENST00000238892.3	70	112	14	11	4	2.68891
ENST00000238892.3:73-112	ENST00000238892.3	73	112	14	8	4	2.77529
ENST00000238961.8:302-419	ENST00000238961.8	302	419	10	0	0	4.39232
ENST00000238961.8:311-419	ENST00000238961.8	311	419	10	0	0	4.39232
ENST00000238961.8:329-419	ENST00000238961.8	329	419	10	0	0	4.39232
ENST00000238961.8:383-419	ENST00000238961.8	383	419	10	0	0	4.39232
ENST00000239223.3:16-91	ENST00000239223.3	16	91	8	3	3	2.19265
ENST00000239223.3:22-91	ENST00000239223.3	22	91	8	2	3	2.52838
ENST00000239690.8:205-349	ENST00000239690.8	205	349	4	10	4	-2.32193
ENST00000239690.8:265-349	ENST00000239690.8	265	349	4	10	4	-2.32193
ENST00000239690.8:277-349	ENST00000239690.8	277	349	4	10	4	-2.32193
ENST00000239690.8:286-349	ENST00000239690.8	286	349	2	8	4	-2.32193
ENST00000239690.8:303-318	ENST00000239690.8	303	318	4	1	2	1.58496
ENST00000239882.6:29-101	ENST00000239882.6	29	101	4	1	1	2
ENST00000240100.6:155-305	ENST00000240100.6	155	305	10	42	94	-6.22618
ENST00000240100.6:170-305	ENST00000240100.6	170	305	10	38	94	-6.29086
ENST00000240100.6:198-204	ENST00000240100.6	198	204	35	89	7	-6.33222
ENST00000240100.6:200-305	ENST00000240100.6	200	305	10	5	4	2.09192
ENST00000240100.6:212-305	ENST00000240100.6	212	305	2	1	2	0.485427
ENST00000240100.6:260-305	ENST00000240100.6	260	305	2	1	1	0.584963
ENST00000240100.6:273-333	ENST00000240100.6	273	333	1	1	2	-0.584963
ENST00000240100.6:33-120	ENST00000240100.6	33	120	15	33	2	-4.91073
ENST00000240100.6:42-120	ENST00000240100.6	42	120	12	33	2	-5.04253
ENST00000240285.9:101-272	ENST00000240285.9	101	272	33	29	11	3.61914
ENST00000240285.9:111-210	ENST00000240285.9	111	210	25	7	27	-3.73758
ENST00000240285.9:122-272	ENST00000240285.9	122	272	33	28	11	3.59495
ENST00000240285.9:126-210	ENST00000240285.9	126	210	23	6	27	-3.8401
ENST00000240285.9:14-272	ENST00000240285.9	14	272	37	91	28	-5.51266
ENST00000240285.9:196-328	ENST00000240285.9	196	328	198	56	28	7.47384
ENST00000240285.9:206-272	ENST00000240285.9	206	272	27	24	7	3.70426
ENST00000240285.9:229-328	ENST00000240285.9	229	328	194	29	7	8.09547
ENST00000240285.9:236-272	ENST00000240285.9	236	272	5	3	4	0.584963
ENST00000240285.9:25-328	ENST00000240285.9	25	328	218	61	95	6.78724
ENST00000240285.9:268-328	ENST00000240285.9	268	328	190	24	4	8.1696
ENST00000240285.9:30-54	ENST00000240285.9	30	54	60	8	2	6.46271
ENST00000240285.9:318-348	ENST00000240285.9	318	348	4	203	18	-8.36626
ENST00000240285.9:324-348	ENST00000240285.9	324	348	3	203	9	-8.5009
ENST00000240285.9:355-589	ENST00000240285.9	355	589	12	14	1	-3.57154
ENST00000240285.9:367-589	ENST00000240285.9	367	589	12	11	1	3.35755
ENST00000240285.9:400-589	ENST00000240285.9	400	589	12	10	1	3.31564
ENST00000240285.9:412-589	ENST00000240285.9	412	589	12	10	1	3.31564
ENST00000240285.9:42-54	ENST00000240285.9	42	54	60	7	2	6.50503
ENST00000240285.9:490-589	ENST00000240285.9	490	589	10	2	1	3.61244
ENST00000240285.9:50-272	ENST00000240285.9	50	272	36	86	24	-5.50584
ENST00000240285.9:66-210	ENST00000240285.9	66	210	27	16	27	2.15612
ENST00000240285.9:81-210	ENST00000240285.9	81	210	27	12	27	2.96683
ENST00000240285.9:9-54	ENST00000240285.9	9	54	60	8	3	6.41273
ENST00000241393.3:19-64	ENST00000241393.3	19	64	16	18	0	-4.184
ENST00000241393.3:22-64	ENST00000241393.3	22	64	16	18	0	-4.184
ENST00000241393.3:46-64	ENST00000241393.3	46	64	14	7	0	3.90689
ENST00000241393.3:49-64	ENST00000241393.3	49	64	12	6	0	3.70044
ENST00000241704.7:115-205	ENST00000241704.7	115	205	4	6	1	-2.15528
ENST00000241704.7:85-205	ENST00000241704.7	85	205	4	6	1	-2.15528
ENST00000242057.8:104-110	ENST00000242057.8	104	110	3	24	4	-4.81564
ENST00000242057.8:292-484	ENST00000242057.8	292	484	10	3	23	-4.18322
ENST00000242057.8:31-292	ENST00000242057.8	31	292	9	24	32	-3.7639
ENST00000242057.8:328-484	ENST00000242057.8	328	484	10	3	23	-4.18322
ENST00000242057.8:337-484	ENST00000242057.8	337	484	10	3	23	-4.18322
ENST00000242057.8:35-110	ENST00000242057.8	35	110	6	25	6	-4.3585
ENST00000242057.8:363-471	ENST00000242057.8	363	471	20	2	2	4.80735
ENST00000242057.8:370-484	ENST00000242057.8	370	484	2	2	20	-4.80735
ENST00000242057.8:414-471	ENST00000242057.8	414	471	20	2	2	4.80735
ENST00000242057.8:438-471	ENST00000242057.8	438	471	20	1	2	4.94608
ENST00000242057.8:453-471	ENST00000242057.8	453	471	2	0	2	1.58496
ENST00000242057.8:480-621	ENST00000242057.8	480	621	8	4	2	2.32193
ENST00000242057.8:51-186	ENST00000242057.8	51	186	28	9	20	3.40312
ENST00000242057.8:56-110	ENST00000242057.8	56	110	3	25	6	-4.70695
ENST00000242057.8:69-186	ENST00000242057.8	69	186	28	9	20	3.40312
ENST00000242057.8:9-186	ENST00000242057.8	9	186	28	9	26	3.50855
ENST00000242275.6:15-63	ENST00000242275.6	15	63	0	0	8	-4.08746
ENST00000242275.6:43-88	ENST00000242275.6	43	88	0	8	2	-3.51096
ENST00000242275.6:50-119	ENST00000242275.6	50	119	10	6	4	1.926
ENST00000242275.6:59-119	ENST00000242275.6	59	119	10	6	4	1.926
ENST00000242275.6:62-119	ENST00000242275.6	62	119	10	6	4	1.926
ENST00000242275.6:9-63	ENST00000242275.6	9	63	0	0	8	-4.08746
ENST00000242591.9:141-183	ENST00000242591.9	141	183	2	7	0	-3.27302
ENST00000242591.9:144-183	ENST00000242591.9	144	183	2	7	0	-3.27302
ENST00000242591.9:99-183	ENST00000242591.9	99	183	2	9	0	-3.72048
ENST00000242719.3:23-161	ENST00000242719.3	23	161	5	7	0	-2.90689
ENST00000242719.3:41-161	ENST00000242719.3	41	161	5	7	0	-2.90689
ENST00000242719.3:56-161	ENST00000242719.3	56	161	5	7	0	-2.90689
ENST00000242827.10:9-48	ENST00000242827.10	9	48	3	12	20	-3.74416
ENST00000243077.7:22-31	ENST00000243077.7	22	31	9	14	1	-3.55459
ENST00000243077.7:5-422	ENST00000243077.7	5	422	14	1	11	3.54749
ENST00000243326.9:17-332	ENST00000243326.9	17	332	3	2	4	-0.736966
ENST00000243326.9:43-394	ENST00000243326.9	43	394	4	3	2	0.736966
ENST00000243326.9:47-332	ENST00000243326.9	47	332	3	2	4	-0.736966
ENST00000243326.9:50-332	ENST00000243326.9	50	332	3	2	4	-0.736966
ENST00000243326.9:80-332	ENST00000243326.9	80	332	3	2	4	-0.736966
ENST00000243501.9:101-107	ENST00000243501.9	101	107	0	8	1	-3.77259
ENST00000243501.9:20-107	ENST00000243501.9	20	107	2	8	1	-3.14048
ENST00000243501.9:23-107	ENST00000243501.9	23	107	2	8	1	-3.14048
ENST00000243501.9:32-107	ENST00000243501.9	32	107	0	8	1	-3.77259
ENST00000243501.9:45-195	ENST00000243501.9	45	195	8	1	0	3.77259
ENST00000243501.9:54-195	ENST00000243501.9	54	195	8	1	0	3.77259
ENST00000243501.9:75-195	ENST00000243501.9	75	195	8	1	0	3.77259
ENST00000243501.9:81-195	ENST00000243501.9	81	195	8	1	0	3.77259
ENST00000243501.9:85-124	ENST00000243501.9	85	124	1	0	8	-3.77259
ENST00000243563.7:121-505	ENST00000243563.7	121	505	13	18	11	-1.51457
ENST00000243563.7:125-188	ENST00000243563.7	125	188	1	7	3	-2.60666
ENST00000243563.7:142-505	ENST00000243563.7	142	505	13	18	11	-1.51457
ENST00000243563.7:152-188	ENST00000243563.7	152	188	1	7	2	-2.848
ENST00000243563.7:162-282	ENST00000243563.7	162	282	7	12	11	-1.26303
ENST00000243563.7:165-282	ENST00000243563.7	165	282	7	11	11	-1.07276
ENST00000243563.7:180-282	ENST00000243563.7	180	282	0	10	10	-3.45943
ENST00000243563.7:19-505	ENST00000243563.7	19	505	13	18	11	-1.51457
ENST00000243563.7:191-308	ENST00000243563.7	191	308	10	0	10	3.45943
ENST00000243563.7:209-308	ENST00000243563.7	209	308	10	0	10	3.45943
ENST00000243563.7:240-282	ENST00000243563.7	240	282	0	10	1	-4.13303
ENST00000243563.7:252-282	ENST00000243563.7	252	282	0	10	1	-4.13303
ENST00000243563.7:256-505	ENST00000243563.7	256	505	10	8	4	1.82597
ENST00000243563.7:283-505	ENST00000243563.7	283	505	0	7	4	-2.94996
ENST00000243563.7:314-461	ENST00000243563.7	314	461	7	4	0	2.94996
ENST00000243563.7:352-505	ENST00000243563.7	352	505	0	7	1	-3.55459
ENST00000243563.7:359-461	ENST00000243563.7	359	461	6	1	0	3.30117
ENST00000243563.7:52-505	ENST00000243563.7	52	505	13	18	11	-1.51457
ENST00000243563.7:89-188	ENST00000243563.7	89	188	1	7	3	-2.60666
ENST00000243563.7:95-188	ENST00000243563.7	95	188	1	7	3	-2.60666
ENST00000243918.9:10-244	ENST00000243918.9	10	244	2	6	1	-2.5025
ENST00000243918.9:107-182	ENST00000243918.9	107	182	1	1	2	-0.584963
ENST00000243918.9:122-182	ENST00000243918.9	122	182	1	1	2	-0.584963
ENST00000243918.9:155-182	ENST00000243918.9	155	182	1	1	2	-0.584963
ENST00000243918.9:170-182	ENST00000243918.9	170	182	1	0	2	-1.58496
ENST00000243918.9:2-182	ENST00000243918.9	2	182	1	1	2	-0.584963
ENST00000243918.9:34-244	ENST00000243918.9	34	244	2	6	1	-2.5025
ENST00000243918.9:40-244	ENST00000243918.9	40	244	2	6	1	-2.5025
ENST00000243918.9:65-182	ENST00000243918.9	65	182	1	1	2	-0.584963
ENST00000243918.9:76-244	ENST00000243918.9	76	244	2	6	1	-2.5025
ENST00000243918.9:8-182	ENST00000243918.9	8	182	1	1	2	-0.584963
ENST00000243918.9:80-182	ENST00000243918.9	80	182	1	1	2	-0.584963
ENST00000244230.6:148-259	ENST00000244230.6	148	259	5	7	0	-2.90689
ENST00000244230.6:154-259	ENST00000244230.6	154	259	5	7	0	-2.90689
ENST00000244230.6:164-347	ENST00000244230.6	164	347	4	2	4	0.847997
ENST00000244230.6:179-347	ENST00000244230.6	179	347	4	2	4	0.847997
ENST00000244230.6:196-259	ENST00000244230.6	196	259	4	2	0	2.32193
ENST00000244230.6:202-259	ENST00000244230.6	202	259	4	2	0	2.32193
ENST00000244230.6:208-259	ENST00000244230.6	208	259	4	2	0	2.32193
ENST00000244230.6:212-347	ENST00000244230.6	212	347	4	2	4	0.847997
ENST00000244230.6:233-347	ENST00000244230.6	233	347	2	2	4	-1
ENST00000244520.9:104-110	ENST00000244520.9	104	110	4	3	0	2.23704
ENST00000244520.9:80-110	ENST00000244520.9	80	110	6	3	0	2.80735
ENST00000244745.3:1006-1213	ENST00000244745.3	1006	1213	11	6	1	3.22239
ENST00000244745.3:1012-1213	ENST00000244745.3	1012	1213	11	4	1	3.44294
ENST00000244745.3:1027-1213	ENST00000244745.3	1027	1213	11	4	1	3.44294
ENST00000244745.3:1057-1213	ENST00000244745.3	1057	1213	11	3	1	3.60881
ENST00000244745.3:1072-1213	ENST00000244745.3	1072	1213	11	3	1	3.60881
ENST00000244745.3:1077-1290	ENST00000244745.3	1077	1290	5	52	10	-5.92295
ENST00000244745.3:1089-1290	ENST00000244745.3	1089	1290	4	47	9	-5.81506
ENST00000244745.3:1110-1290	ENST00000244745.3	1110	1290	4	46	9	-5.76886
ENST00000244745.3:1143-1290	ENST00000244745.3	1143	1290	4	43	9	-5.62205
ENST00000244745.3:1158-1290	ENST00000244745.3	1158	1290	4	43	9	-5.62205
ENST00000244745.3:1182-1290	ENST00000244745.3	1182	1290	4	41	7	-5.63607
ENST00000244745.3:1196-1271	ENST00000244745.3	1196	1271	7	3	23	-4.41709
ENST00000244745.3:1212-1290	ENST00000244745.3	1212	1290	4	41	7	-5.63607
ENST00000244745.3:1237-1330	ENST00000244745.3	1237	1330	26	12	38	-3.84483
ENST00000244745.3:1255-1330	ENST00000244745.3	1255	1330	25	9	38	-4.21594
ENST00000244745.3:1260-1290	ENST00000244745.3	1260	1290	2	21	3	-4.77529
ENST00000244745.3:1283-1310	ENST00000244745.3	1283	1310	2	33	19	-4.79586
ENST00000244745.3:1295-1310	ENST00000244745.3	1295	1310	2	32	1	-5.76022
ENST00000244745.3:1331-1499	ENST00000244745.3	1331	1499	2	4	5	-1.18442
ENST00000244745.3:1400-1499	ENST00000244745.3	1400	1499	2	1	5	-2.08746
ENST00000244745.3:1485-1737	ENST00000244745.3	1485	1737	3	9	5	-2.10236
ENST00000244745.3:1620-1737	ENST00000244745.3	1620	1737	2	2	3	-0.36257
ENST00000244745.3:991-1213	ENST00000244745.3	991	1213	11	9	1	3.16993
ENST00000245615.5:213-345	ENST00000245615.5	213	345	2	10	7	-2.62244
ENST00000245615.5:318-345	ENST00000245615.5	318	345	0	6	0	-3.70044
ENST00000245615.5:324-345	ENST00000245615.5	324	345	0	6	0	-3.70044
ENST00000245615.5:33-345	ENST00000245615.5	33	345	2	10	7	-2.62244
ENST00000245615.5:66-345	ENST00000245615.5	66	345	2	10	7	-2.62244
ENST00000245680.6:211-349	ENST00000245680.6	211	349	23	13	12	2.49185
ENST00000245680.6:312-360	ENST00000245680.6	312	360	15	50	13	-5.10046
ENST00000245680.6:333-360	ENST00000245680.6	333	360	15	45	7	-5.20712
ENST00000245680.6:345-360	ENST00000245680.6	345	360	6	30	0	-5.42626
ENST00000245680.6:354-360	ENST00000245680.6	354	360	3	27	0	-5.48543
ENST00000245787.8:0-183	ENST00000245787.8	0	183	14	4	1	3.96639
ENST00000245787.8:33-183	ENST00000245787.8	33	183	13	4	1	3.80735
ENST00000245787.8:40-202	ENST00000245787.8	40	202	4	1	13	-3.80735
ENST00000245787.8:53-80	ENST00000245787.8	53	80	1	5	0	-3
ENST00000245787.8:6-183	ENST00000245787.8	6	183	14	4	1	3.96639
ENST00000245787.8:73-202	ENST00000245787.8	73	202	4	0	8	-3.16993
ENST00000245787.8:98-113	ENST00000245787.8	98	113	0	8	0	-4.08746
ENST00000245816.8:5-83	ENST00000245816.8	5	83	1	10	0	-4.13303
ENST00000245903.3:15-27	ENST00000245903.3	15	27	1	5	0	-3
ENST00000245932.10:103-169	ENST00000245932.10	103	169	4	8	32	-5.01224
ENST00000245932.10:110-290	ENST00000245932.10	110	290	46	48	7	-5.0331
ENST00000245932.10:121-169	ENST00000245932.10	121	169	4	8	27	-4.59877
ENST00000245932.10:124-169	ENST00000245932.10	124	169	4	8	27	-4.59877
ENST00000245932.10:13-52	ENST00000245932.10	13	52	37	117	5	-6.98396
ENST00000245932.10:137-290	ENST00000245932.10	137	290	44	42	7	4.85477
ENST00000245932.10:140-290	ENST00000245932.10	140	290	43	42	7	4.82848
ENST00000245932.10:15-87	ENST00000245932.10	15	87	7	40	117	-6.87742
ENST00000245932.10:19-52	ENST00000245932.10	19	52	37	117	5	-6.98396
ENST00000245932.10:232-259	ENST00000245932.10	232	259	1	25	8	-4.80128
ENST00000245932.10:245-290	ENST00000245932.10	245	290	8	4	1	2.7425
ENST00000245932.10:28-52	ENST00000245932.10	28	52	37	117	5	-6.98396
ENST00000245932.10:36-87	ENST00000245932.10	36	87	7	40	117	-6.87742
ENST00000245932.10:41-290	ENST00000245932.10	41	290	163	55	47	6.58547
ENST00000245932.10:46-52	ENST00000245932.10	46	52	37	117	5	-6.98396
ENST00000246151.8:15-48	ENST00000246151.8	15	48	5	11	8	-1.70044
ENST00000246151.8:24-48	ENST00000246151.8	24	48	5	11	8	-1.70044
ENST00000246151.8:39-48	ENST00000246151.8	39	48	1	8	0	-3.77259
ENST00000246174.6:272-431	ENST00000246174.6	272	431	3	1	1	1.37851
ENST00000246174.6:278-431	ENST00000246174.6	278	431	3	1	1	1.37851
ENST00000246174.6:280-499	ENST00000246174.6	280	499	5	4	2	1.18442
ENST00000246174.6:287-431	ENST00000246174.6	287	431	3	1	1	1.37851
ENST00000246174.6:293-431	ENST00000246174.6	293	431	3	1	1	1.37851
ENST00000246174.6:295-499	ENST00000246174.6	295	499	5	4	2	1.18442
ENST00000246174.6:310-499	ENST00000246174.6	310	499	5	1	2	2.08746
ENST00000246174.6:358-499	ENST00000246174.6	358	499	5	1	2	2.08746
ENST00000246174.6:373-499	ENST00000246174.6	373	499	5	1	2	2.08746
ENST00000246174.6:385-499	ENST00000246174.6	385	499	4	1	2	1.58496
ENST00000246174.6:391-499	ENST00000246174.6	391	499	4	1	2	1.58496
ENST00000246174.6:394-499	ENST00000246174.6	394	499	4	1	2	1.58496
ENST00000246174.6:397-499	ENST00000246174.6	397	499	4	1	2	1.58496
ENST00000246174.6:436-499	ENST00000246174.6	436	499	4	1	1	2
ENST00000246174.6:442-499	ENST00000246174.6	442	499	3	1	1	1.37851
ENST00000246174.6:466-499	ENST00000246174.6	466	499	3	1	0	2.16993
ENST00000246174.6:480-585	ENST00000246174.6	480	585	0	8	2	-3.51096
ENST00000246174.6:486-585	ENST00000246174.6	486	585	0	8	2	-3.51096
ENST00000246314.10:114-261	ENST00000246314.10	114	261	11	19	2	-3.86419
ENST00000246314.10:123-261	ENST00000246314.10	123	261	11	19	2	-3.86419
ENST00000246314.10:165-261	ENST00000246314.10	165	261	11	11	0	3.58496
ENST00000246314.10:169-364	ENST00000246314.10	169	364	19	16	15	0.604071
ENST00000246314.10:19-70	ENST00000246314.10	19	70	3	17	1	-4.50553
ENST00000246314.10:194-323	ENST00000246314.10	194	323	1	10	9	-3.05311
ENST00000246314.10:214-364	ENST00000246314.10	214	364	17	16	10	1.58496
ENST00000246314.10:217-364	ENST00000246314.10	217	364	17	16	10	1.58496
ENST00000246314.10:230-323	ENST00000246314.10	230	323	1	6	4	-2.15528
ENST00000246314.10:236-323	ENST00000246314.10	236	323	1	6	4	-2.15528
ENST00000246314.10:244-364	ENST00000246314.10	244	364	12	16	6	-2.4517
ENST00000246314.10:262-364	ENST00000246314.10	262	364	8	16	4	-3.16993
ENST00000246314.10:265-364	ENST00000246314.10	265	364	8	16	4	-3.16993
ENST00000246314.10:370-442	ENST00000246314.10	370	442	7	0	2	3.27302
ENST00000246314.10:382-442	ENST00000246314.10	382	442	6	0	2	3
ENST00000246314.10:391-442	ENST00000246314.10	391	442	6	0	2	3
ENST00000246314.10:457-469	ENST00000246314.10	457	469	10	0	0	4.39232
ENST00000246314.10:484-502	ENST00000246314.10	484	502	6	1	0	3.30117
ENST00000246314.10:66-261	ENST00000246314.10	66	261	11	22	2	-4.18587
ENST00000246314.10:72-261	ENST00000246314.10	72	261	11	22	2	-4.18587
ENST00000246554.7:122-140	ENST00000246554.7	122	140	34	1	13	5.16491
ENST00000246554.7:124-181	ENST00000246554.7	124	181	70	152	5	-7.1742
ENST00000246554.7:127-181	ENST00000246554.7	127	181	68	150	5	-7.16222
ENST00000246554.7:133-181	ENST00000246554.7	133	181	61	148	5	-7.19554
ENST00000246554.7:136-181	ENST00000246554.7	136	181	61	147	5	-7.18103
ENST00000246554.7:14-140	ENST00000246554.7	14	140	35	7	15	4.51694
ENST00000246554.7:148-181	ENST00000246554.7	148	181	56	117	4	-6.77401
ENST00000246554.7:160-181	ENST00000246554.7	160	181	47	45	4	5.24079
ENST00000246554.7:23-140	ENST00000246554.7	23	140	35	7	15	4.51694
ENST00000246554.7:95-140	ENST00000246554.7	95	140	35	7	14	4.56986
ENST00000246868.6:10-28	ENST00000246868.6	10	28	2	5	0	-2.6845
ENST00000246868.6:22-28	ENST00000246868.6	22	28	2	2	0	1.58496
ENST00000247020.8:101-134	ENST00000247020.8	101	134	13	5	7	2.36737
ENST00000247020.8:109-178	ENST00000247020.8	109	178	7	13	5	-2.36737
ENST00000247020.8:220-298	ENST00000247020.8	220	298	4	3	3	0.263034
ENST00000247020.8:5-134	ENST00000247020.8	5	134	13	5	7	2.36737
ENST00000247020.8:56-134	ENST00000247020.8	56	134	13	5	7	2.36737
ENST00000247020.8:95-134	ENST00000247020.8	95	134	13	5	7	2.36737
ENST00000247161.7:5-86	ENST00000247161.7	5	86	11	27	1	-4.77934
ENST00000247161.7:53-86	ENST00000247161.7	53	86	11	27	1	-4.77934
ENST00000247665.11:139-217	ENST00000247665.11	139	217	8	0	5	3.09398
ENST00000247665.11:166-217	ENST00000247665.11	166	217	8	0	5	3.09398
ENST00000247829.7:115-166	ENST00000247829.7	115	166	1	3	0	-2.16993
ENST00000247829.7:140-233	ENST00000247829.7	140	233	11	0	2	4.07435
ENST00000247829.7:153-240	ENST00000247829.7	153	240	0	2	10	-3.90689
ENST00000247829.7:166-244	ENST00000247829.7	166	244	2	10	0	-3.90689
ENST00000247829.7:172-244	ENST00000247829.7	172	244	2	8	0	-3.51096
ENST00000247829.7:93-150	ENST00000247829.7	93	150	0	1	2	-1.58496
ENST00000248244.5:108-129	ENST00000248244.5	108	129	2	9	0	-3.72048
ENST00000248244.5:9-129	ENST00000248244.5	9	129	3	9	0	-3.52356
ENST00000248244.5:93-129	ENST00000248244.5	93	129	2	9	0	-3.72048
ENST00000248248.7:126-165	ENST00000248248.7	126	165	0	8	0	-4.08746
ENST00000248248.7:147-165	ENST00000248248.7	147	165	0	5	0	-3.45943
ENST00000248248.7:179-335	ENST00000248248.7	179	335	5	11	1	-3.31342
ENST00000248248.7:215-335	ENST00000248248.7	215	335	5	11	1	-3.31342
ENST00000248248.7:244-304	ENST00000248248.7	244	304	0	5	9	-3.28011
ENST00000248248.7:275-335	ENST00000248248.7	275	335	5	11	1	-3.31342
ENST00000248248.7:278-335	ENST00000248248.7	278	335	5	11	1	-3.31342
ENST00000248248.7:67-151	ENST00000248248.7	67	151	5	3	9	-2.10236
ENST00000248248.7:76-151	ENST00000248248.7	76	151	5	3	9	-2.10236
ENST00000248378.5:12-48	ENST00000248378.5	12	48	21	140	12	-7.47597
ENST00000248553.6:1-55	ENST00000248553.6	1	55	9	0	5	3.28011
ENST00000248553.6:12-81	ENST00000248553.6	12	81	5	13	0	-3.9386
ENST00000248553.6:16-55	ENST00000248553.6	16	55	9	0	5	3.28011
ENST00000248553.6:37-55	ENST00000248553.6	37	55	9	0	4	3.37638
ENST00000248553.6:45-81	ENST00000248553.6	45	81	4	13	0	-4.0572
ENST00000248564.5:100-211	ENST00000248564.5	100	211	29	15	61	-5.03437
ENST00000248564.5:124-211	ENST00000248564.5	124	211	25	14	59	-5.11661
ENST00000248564.5:139-211	ENST00000248564.5	139	211	25	14	56	-4.95224
ENST00000248564.5:143-176	ENST00000248564.5	143	176	3	7	1	-2.60666
ENST00000248564.5:192-237	ENST00000248564.5	192	237	55	36	12	4.80985
ENST00000248564.5:197-260	ENST00000248564.5	197	260	23	62	36	-4.36133
ENST00000248564.5:207-237	ENST00000248564.5	207	237	13	23	2	-4.20328
ENST00000248564.5:241-415	ENST00000248564.5	241	415	107	95	31	5.45901
ENST00000248564.5:248-260	ENST00000248564.5	248	260	10	5	0	3.45943
ENST00000248564.5:25-211	ENST00000248564.5	25	211	29	16	63	-5.07563
ENST00000248564.5:251-260	ENST00000248564.5	251	260	2	5	0	-2.6845
ENST00000248564.5:256-415	ENST00000248564.5	256	415	99	84	24	5.54387
ENST00000248564.5:28-211	ENST00000248564.5	28	211	29	16	63	-5.07563
ENST00000248564.5:325-415	ENST00000248564.5	325	415	88	45	14	5.84216
ENST00000248564.5:367-415	ENST00000248564.5	367	415	35	36	12	-3.84049
ENST00000248564.5:40-211	ENST00000248564.5	40	211	29	16	63	-5.07563
ENST00000248564.5:72-165	ENST00000248564.5	72	165	8	5	4	1.3388
ENST00000248564.5:82-211	ENST00000248564.5	82	211	29	15	62	-5.08586
ENST00000248564.5:94-211	ENST00000248564.5	94	211	29	15	62	-5.08586
ENST00000248566.3:19-67	ENST00000248566.3	19	67	18	24	3	-4.05311
ENST00000248975.5:117-243	ENST00000248975.5	117	243	22	69	7	-6.02373
ENST00000248975.5:128-227	ENST00000248975.5	128	227	6	0	21	-4.75489
ENST00000248975.5:135-243	ENST00000248975.5	135	243	22	69	7	-6.02373
ENST00000248975.5:207-243	ENST00000248975.5	207	243	22	58	6	-5.65788
ENST00000248975.5:237-243	ENST00000248975.5	237	243	16	42	1	-5.48423
ENST00000248975.5:56-227	ENST00000248975.5	56	227	9	1	21	-4.36548
ENST00000249356.3:187-445	ENST00000249356.3	187	445	1	8	1	-3.43296
ENST00000249356.3:199-445	ENST00000249356.3	199	445	1	8	1	-3.43296
ENST00000249356.3:304-445	ENST00000249356.3	304	445	1	8	1	-3.43296
ENST00000249356.3:346-445	ENST00000249356.3	346	445	1	8	1	-3.43296
ENST00000249356.3:361-445	ENST00000249356.3	361	445	1	8	1	-3.43296
ENST00000249356.3:400-445	ENST00000249356.3	400	445	1	8	0	-3.77259
ENST00000249356.3:415-445	ENST00000249356.3	415	445	1	6	0	-3.30117
ENST00000249364.8:15-36	ENST00000249364.8	15	36	1	7	0	-3.55459
ENST00000249822.8:102-141	ENST00000249822.8	102	141	2	8	0	-3.51096
ENST00000249822.8:16-232	ENST00000249822.8	16	232	8	1	2	3.14048
ENST00000249822.8:64-232	ENST00000249822.8	64	232	8	1	2	3.14048
ENST00000249822.8:91-232	ENST00000249822.8	91	232	8	1	2	3.14048
ENST00000250092.10:184-199	ENST00000250092.10	184	199	0	2	2	-1.58496
ENST00000250454.7:51-66	ENST00000250454.7	51	66	7	8	0	-3.10434
ENST00000250454.7:57-66	ENST00000250454.7	57	66	2	8	0	-3.51096
ENST00000250454.7:60-66	ENST00000250454.7	60	66	2	8	0	-3.51096
ENST00000250495.9:43-145	ENST00000250495.9	43	145	8	7	1	2.67243
ENST00000250495.9:61-145	ENST00000250495.9	61	145	8	7	1	2.67243
ENST00000250495.9:91-145	ENST00000250495.9	91	145	6	7	0	-2.92892
ENST00000251076.9:13-229	ENST00000251076.9	13	229	8	3	0	3.30875
ENST00000251076.9:34-229	ENST00000251076.9	34	229	8	3	0	3.30875
ENST00000251195.9:4-46	ENST00000251195.9	4	46	4	0	3	2.23704
ENST00000251195.9:7-46	ENST00000251195.9	7	46	4	0	3	2.23704
ENST00000251412.7:10-157	ENST00000251412.7	10	157	5	19	4	-4.00643
ENST00000251412.7:127-157	ENST00000251412.7	127	157	3	10	0	-3.71741
ENST00000251412.7:19-157	ENST00000251412.7	19	157	5	19	4	-4.00643
ENST00000251412.7:52-157	ENST00000251412.7	52	157	5	19	4	-4.00643
ENST00000251412.7:7-157	ENST00000251412.7	7	157	5	19	4	-4.00643
ENST00000251607.10:33-90	ENST00000251607.10	33	90	9	19	0	-4.34746
ENST00000251607.10:39-90	ENST00000251607.10	39	90	9	19	0	-4.34746
ENST00000251607.10:48-90	ENST00000251607.10	48	90	9	19	0	-4.34746
ENST00000251607.10:75-90	ENST00000251607.10	75	90	9	19	0	-4.34746
ENST00000251822.6:206-359	ENST00000251822.6	206	359	4	3	0	2.23704
ENST00000251822.6:251-359	ENST00000251822.6	251	359	4	3	0	2.23704
ENST00000251822.6:295-460	ENST00000251822.6	295	460	0	6	1	-3.30117
ENST00000251822.6:316-460	ENST00000251822.6	316	460	0	4	1	-2.63227
ENST00000251822.6:324-465	ENST00000251822.6	324	465	7	3	4	1.51457
ENST00000251822.6:333-465	ENST00000251822.6	333	465	7	3	4	1.51457
ENST00000251822.6:343-460	ENST00000251822.6	343	460	0	4	1	-2.63227
ENST00000251822.6:69-273	ENST00000251822.6	69	273	0	0	6	-3.70044
ENST00000251822.6:73-241	ENST00000251822.6	73	241	0	5	0	-3.45943
ENST00000252108.7:29-125	ENST00000252108.7	29	125	23	2	3	4.95752
ENST00000252108.7:47-125	ENST00000252108.7	47	125	23	2	3	4.95752
ENST00000252485.8:146-323	ENST00000252485.8	146	323	8	6	5	0.796467
ENST00000252485.8:159-282	ENST00000252485.8	159	282	6	0	5	2.73039
ENST00000252485.8:179-323	ENST00000252485.8	179	323	7	6	0	2.92892
ENST00000252599.8:94-103	ENST00000252599.8	94	103	13	23	9	-2.98793
ENST00000252934.9:251-257	ENST00000252934.9	251	257	11	6	0	3.54916
ENST00000252984.11:31-127	ENST00000252984.11	31	127	1	5	0	-3
ENST00000252984.11:40-127	ENST00000252984.11	40	127	1	5	0	-3
ENST00000252984.11:43-127	ENST00000252984.11	43	127	1	5	0	-3
ENST00000252984.11:46-127	ENST00000252984.11	46	127	1	5	0	-3
ENST00000252992.8:19-118	ENST00000252992.8	19	118	2	2	5	-1.58496
ENST00000252992.8:76-118	ENST00000252992.8	76	118	2	2	1	0.485427
ENST00000253024.9:108-123	ENST00000253024.9	108	123	19	108	56	-6.05617
ENST00000253024.9:114-123	ENST00000253024.9	114	123	15	105	55	-6.14393
ENST00000253024.9:60-123	ENST00000253024.9	60	123	19	108	60	-6.01499
ENST00000253039.8:148-232	ENST00000253039.8	148	232	2	5	0	-2.6845
ENST00000253039.8:202-232	ENST00000253039.8	202	232	2	5	0	-2.6845
ENST00000253039.8:208-232	ENST00000253039.8	208	232	2	5	0	-2.6845
ENST00000253039.8:29-152	ENST00000253039.8	29	152	4	4	15	-3.52629
ENST00000253039.8:34-232	ENST00000253039.8	34	232	17	9	3	3.48631
ENST00000253039.8:4-232	ENST00000253039.8	4	232	17	10	4	3.20062
ENST00000253039.8:60-126	ENST00000253039.8	60	126	3	13	3	-3.52686
ENST00000253039.8:8-152	ENST00000253039.8	8	152	5	4	15	-3.35755
ENST00000253039.8:91-232	ENST00000253039.8	91	232	7	7	3	1.52725
ENST00000253063.3:78-216	ENST00000253063.3	78	216	0	0	4	-3.16993
ENST00000253122.9:243-291	ENST00000253122.9	243	291	17	77	6	-6.46956
ENST00000253122.9:269-419	ENST00000253122.9	269	419	4	5	29	-5.0282
ENST00000253122.9:276-291	ENST00000253122.9	276	291	5	28	4	-4.94916
ENST00000253251.12:168-531	ENST00000253251.12	168	531	29	13	22	2.81378
ENST00000253251.12:171-531	ENST00000253251.12	171	531	29	13	22	2.81378
ENST00000253251.12:234-531	ENST00000253251.12	234	531	29	13	22	2.81378
ENST00000253251.12:290-578	ENST00000253251.12	290	578	22	31	13	-3.06413
ENST00000253251.12:299-578	ENST00000253251.12	299	578	22	31	13	-3.06413
ENST00000253251.12:330-531	ENST00000253251.12	330	531	29	13	22	2.81378
ENST00000253251.12:333-531	ENST00000253251.12	333	531	29	13	22	2.81378
ENST00000253251.12:348-531	ENST00000253251.12	348	531	29	13	22	2.81378
ENST00000253251.12:354-531	ENST00000253251.12	354	531	29	13	22	2.81378
ENST00000253251.12:384-531	ENST00000253251.12	384	531	29	12	22	2.99139
ENST00000253251.12:447-531	ENST00000253251.12	447	531	26	7	18	3.54916
ENST00000253251.12:469-523	ENST00000253251.12	469	523	7	15	23	-3.25298
ENST00000253251.12:493-523	ENST00000253251.12	493	523	6	15	23	-3.44144
ENST00000253251.12:498-531	ENST00000253251.12	498	531	26	6	13	3.88101
ENST00000253251.12:503-578	ENST00000253251.12	503	578	13	28	6	-4.09826
ENST00000253251.12:515-578	ENST00000253251.12	515	578	1	16	6	-4.01947
ENST00000253251.12:523-550	ENST00000253251.12	523	550	5	1	5	1.96683
ENST00000253251.12:586-628	ENST00000253251.12	586	628	7	4	5	0.906891
ENST00000253693.6:11-134	ENST00000253693.6	11	134	0	6	0	-3.70044
ENST00000253693.6:80-134	ENST00000253693.6	80	134	0	6	0	-3.70044
ENST00000253814.5:10-322	ENST00000253814.5	10	322	3	5	0	-2.52356
ENST00000253814.5:227-431	ENST00000253814.5	227	431	5	0	8	-3.09398
ENST00000253814.5:307-322	ENST00000253814.5	307	322	3	5	0	-2.52356
ENST00000253814.5:34-322	ENST00000253814.5	34	322	3	5	0	-2.52356
ENST00000253814.5:61-322	ENST00000253814.5	61	322	3	5	0	-2.52356
ENST00000253814.5:91-322	ENST00000253814.5	91	322	3	5	0	-2.52356
ENST00000254190.3:114-390	ENST00000254190.3	114	390	7	10	4	-1.8365
ENST00000254190.3:132-390	ENST00000254190.3	132	390	7	10	4	-1.8365
ENST00000254190.3:155-224	ENST00000254190.3	155	224	0	5	4	-2.5025
ENST00000254190.3:18-390	ENST00000254190.3	18	390	10	20	5	-3.45943
ENST00000254190.3:20-224	ENST00000254190.3	20	224	5	8	18	-3.31727
ENST00000254190.3:26-224	ENST00000254190.3	26	224	5	8	18	-3.31727
ENST00000254190.3:46-427	ENST00000254190.3	46	427	20	5	10	3.45943
ENST00000254190.3:55-427	ENST00000254190.3	55	427	20	5	10	3.45943
ENST00000254190.3:70-427	ENST00000254190.3	70	427	17	5	10	2.96578
ENST00000254190.3:98-224	ENST00000254190.3	98	224	4	5	8	-1.3388
ENST00000254250.7:18-60	ENST00000254250.7	18	60	6	3	0	2.80735
ENST00000254250.7:24-60	ENST00000254250.7	24	60	6	3	0	2.80735
ENST00000254250.7:31-211	ENST00000254250.7	31	211	6	0	11	-3.54916
ENST00000254250.7:38-86	ENST00000254250.7	38	86	0	9	3	-3.52356
ENST00000254250.7:4-211	ENST00000254250.7	4	211	6	0	11	-3.54916
ENST00000254250.7:42-60	ENST00000254250.7	42	60	6	3	0	2.80735
ENST00000254250.7:44-86	ENST00000254250.7	44	86	0	9	3	-3.52356
ENST00000254250.7:53-86	ENST00000254250.7	53	86	0	9	2	-3.72048
ENST00000254325.8:1-190	ENST00000254325.8	1	190	5	4	9	-1.73697
ENST00000254325.8:10-190	ENST00000254325.8	10	190	5	4	9	-1.73697
ENST00000254803.3:130-181	ENST00000254803.3	130	181	7	11	2	-2.82782
ENST00000254950.12:131-155	ENST00000254950.12	131	155	10	6	0	3.39232
ENST00000254950.12:14-155	ENST00000254950.12	14	155	10	8	0	3.36923
ENST00000254950.12:29-155	ENST00000254950.12	29	155	10	8	0	3.36923
ENST00000254977.7:104-293	ENST00000254977.7	104	293	20	0	9	4.44352
ENST00000254977.7:137-293	ENST00000254977.7	137	293	20	0	9	4.44352
ENST00000254977.7:149-293	ENST00000254977.7	149	293	20	0	9	4.44352
ENST00000254977.7:199-241	ENST00000254977.7	199	241	9	20	0	-4.44352
ENST00000254998.2:190-379	ENST00000254998.2	190	379	4	14	16	-3.05209
ENST00000254998.2:211-379	ENST00000254998.2	211	379	4	14	16	-3.05209
ENST00000254998.2:283-379	ENST00000254998.2	283	379	4	9	16	-3.09039
ENST00000255174.2:2-59	ENST00000255174.2	2	59	1	15	2	-4.41504
ENST00000255174.2:26-59	ENST00000255174.2	26	59	1	15	2	-4.41504
ENST00000255174.2:36-54	ENST00000255174.2	36	54	15	0	1	4.77479
ENST00000255174.2:45-54	ENST00000255174.2	45	54	12	0	1	4.42368
ENST00000255174.2:50-59	ENST00000255174.2	50	59	0	6	2	-3
ENST00000255174.2:55-121	ENST00000255174.2	55	121	13	11	4	2.5325
ENST00000255174.2:59-101	ENST00000255174.2	59	101	3	2	3	0.321928
ENST00000255174.2:7-121	ENST00000255174.2	7	121	13	12	19	-1.56294
ENST00000255198.2:128-209	ENST00000255198.2	128	209	6	13	2	-3.30117
ENST00000255198.2:215-275	ENST00000255198.2	215	275	0	5	2	-2.6845
ENST00000255198.2:218-275	ENST00000255198.2	218	275	0	5	2	-2.6845
ENST00000255198.2:221-275	ENST00000255198.2	221	275	0	5	2	-2.6845
ENST00000255198.2:245-275	ENST00000255198.2	245	275	0	4	0	-3.16993
ENST00000255198.2:248-275	ENST00000255198.2	248	275	0	4	0	-3.16993
ENST00000255198.2:257-275	ENST00000255198.2	257	275	0	4	0	-3.16993
ENST00000255198.2:42-222	ENST00000255198.2	42	222	34	10	8	4.65271
ENST00000255198.2:45-222	ENST00000255198.2	45	222	34	10	8	4.65271
ENST00000255198.2:66-222	ENST00000255198.2	66	222	34	8	8	4.80941
ENST00000255198.2:70-94	ENST00000255198.2	70	94	6	0	7	-2.92892
ENST00000255198.2:74-209	ENST00000255198.2	74	209	8	34	8	-4.80941
ENST00000255198.2:84-222	ENST00000255198.2	84	222	27	2	8	4.83903
ENST00000255198.2:99-222	ENST00000255198.2	99	222	27	2	8	4.83903
ENST00000255641.12:103-283	ENST00000255641.12	103	283	5	11	13	-2.1973
ENST00000255641.12:18-216	ENST00000255641.12	18	216	11	4	5	2.40599
ENST00000255641.12:209-290	ENST00000255641.12	209	290	9	3	1	3.16993
ENST00000255641.12:212-290	ENST00000255641.12	212	290	9	3	1	3.16993
ENST00000255641.12:235-283	ENST00000255641.12	235	283	1	8	3	-2.90689
ENST00000255641.12:238-283	ENST00000255641.12	238	283	1	8	3	-2.90689
ENST00000255641.12:256-283	ENST00000255641.12	256	283	1	8	3	-2.90689
ENST00000255641.12:272-290	ENST00000255641.12	272	290	9	3	1	3.16993
ENST00000255641.12:279-396	ENST00000255641.12	279	396	5	6	9	-1.20163
ENST00000255641.12:286-445	ENST00000255641.12	286	445	5	2	2	1.58496
ENST00000255641.12:294-396	ENST00000255641.12	294	396	2	5	1	-2.08746
ENST00000255641.12:299-350	ENST00000255641.12	299	350	1	2	4	-1.58496
ENST00000255641.12:301-445	ENST00000255641.12	301	445	5	2	0	2.6845
ENST00000255641.12:312-396	ENST00000255641.12	312	396	0	5	1	-3
ENST00000255641.12:5-290	ENST00000255641.12	5	290	14	14	5	2.56294
ENST00000256015.4:102-141	ENST00000256015.4	102	141	4	26	4	-4.8812
ENST00000256015.4:118-232	ENST00000256015.4	118	232	11	7	4	2.12553
ENST00000256015.4:26-212	ENST00000256015.4	26	212	16	24	88	-6.20945
ENST00000256015.4:29-212	ENST00000256015.4	29	212	16	24	88	-6.20945
ENST00000256015.4:33-141	ENST00000256015.4	33	141	23	86	14	-6.24932
ENST00000256015.4:40-82	ENST00000256015.4	40	82	30	5	16	4.28322
ENST00000256015.4:63-141	ENST00000256015.4	63	141	21	86	12	-6.37854
ENST00000256015.4:69-141	ENST00000256015.4	69	141	21	86	12	-6.37854
ENST00000256015.4:78-141	ENST00000256015.4	78	141	8	58	9	-6.05224
ENST00000256015.4:91-232	ENST00000256015.4	91	232	39	10	8	5.03052
ENST00000256015.4:94-232	ENST00000256015.4	94	232	35	10	8	4.73458
ENST00000256319.6:318-438	ENST00000256319.6	318	438	7	23	4	-4.27886
ENST00000256319.6:327-438	ENST00000256319.6	327	438	7	23	4	-4.27886
ENST00000256319.6:339-438	ENST00000256319.6	339	438	7	14	2	-3.38933
ENST00000256319.6:345-438	ENST00000256319.6	345	438	7	14	2	-3.38933
ENST00000256319.6:360-438	ENST00000256319.6	360	438	6	10	2	-2.66297
ENST00000256319.6:393-438	ENST00000256319.6	393	438	6	10	1	-3.03148
ENST00000256319.6:396-438	ENST00000256319.6	396	438	6	10	1	-3.03148
ENST00000256442.9:3-183	ENST00000256442.9	3	183	19	1	1	4.99354
ENST00000256495.3:327-387	ENST00000256495.3	327	387	2	3	14	-3.90689
ENST00000256495.3:336-387	ENST00000256495.3	336	387	2	1	14	-4.28322
ENST00000256495.3:383-437	ENST00000256495.3	383	437	19	16	8	2.46248
ENST00000256495.3:419-437	ENST00000256495.3	419	437	6	14	6	-2.56635
ENST00000256495.3:423-564	ENST00000256495.3	423	564	21	15	17	1.04026
ENST00000256689.9:105-120	ENST00000256689.9	105	120	13	3	15	-3.16993
ENST00000256689.9:121-142	ENST00000256689.9	121	142	3	2	12	-3.54916
ENST00000256689.9:135-342	ENST00000256689.9	135	342	283	769	129	-9.1495
ENST00000256689.9:155-188	ENST00000256689.9	155	188	5	92	4	-7.25384
ENST00000256689.9:167-188	ENST00000256689.9	167	188	1	72	2	-7.06134
ENST00000256689.9:184-310	ENST00000256689.9	184	310	117	29	26	6.55798
ENST00000256689.9:189-342	ENST00000256689.9	189	342	175	763	122	-9.48673
ENST00000256689.9:196-310	ENST00000256689.9	196	310	77	29	25	5.29833
ENST00000256689.9:207-342	ENST00000256689.9	207	342	169	684	122	-9.22698
ENST00000256689.9:220-310	ENST00000256689.9	220	310	36	29	19	2.63559
ENST00000256689.9:253-310	ENST00000256689.9	253	310	34	27	18	2.55731
ENST00000256689.9:257-299	ENST00000256689.9	257	299	9	14	24	-3.07841
ENST00000256689.9:260-299	ENST00000256689.9	260	299	8	12	10	-0.847997
ENST00000256689.9:263-299	ENST00000256689.9	263	299	5	0	9	-3.28011
ENST00000256689.9:282-342	ENST00000256689.9	282	342	153	658	114	-9.22467
ENST00000256689.9:286-310	ENST00000256689.9	286	310	10	21	4	-3.78061
ENST00000256689.9:295-310	ENST00000256689.9	295	310	10	21	4	-3.78061
ENST00000256689.9:300-342	ENST00000256689.9	300	342	153	658	111	-9.23849
ENST00000256689.9:306-342	ENST00000256689.9	306	342	153	658	93	-9.32241
ENST00000256689.9:310-328	ENST00000256689.9	310	328	96	26	74	5.33
ENST00000256689.9:324-342	ENST00000256689.9	324	342	132	620	73	-9.35878
ENST00000256689.9:330-342	ENST00000256689.9	330	342	75	552	61	-9.41448
ENST00000256689.9:375-417	ENST00000256689.9	375	417	8	13	8	-1.4458
ENST00000256689.9:417-444	ENST00000256689.9	417	444	37	26	19	2.81237
ENST00000256689.9:43-142	ENST00000256689.9	43	142	6	17	25	-3.62936
ENST00000256689.9:46-142	ENST00000256689.9	46	142	6	17	25	-3.62936
ENST00000256689.9:87-120	ENST00000256689.9	87	120	13	3	15	-3.16993
ENST00000256897.8:10-79	ENST00000256897.8	10	79	0	0	4	-3.16993
ENST00000256897.8:28-79	ENST00000256897.8	28	79	0	0	4	-3.16993
ENST00000256897.8:50-122	ENST00000256897.8	50	122	3	4	0	-2.23704
ENST00000256897.8:56-122	ENST00000256897.8	56	122	3	4	0	-2.23704
ENST00000256897.8:62-122	ENST00000256897.8	62	122	3	4	0	-2.23704
ENST00000256996.8:115-154	ENST00000256996.8	115	154	12	10	6	1.58496
ENST00000256996.8:150-165	ENST00000256996.8	150	165	6	45	6	-5.7647
ENST00000256996.8:85-154	ENST00000256996.8	85	154	12	10	6	1.58496
ENST00000256996.8:87-165	ENST00000256996.8	87	165	6	45	10	-5.53228
ENST00000257181.9:117-150	ENST00000257181.9	117	150	3	5	50	-6.2108
ENST00000257181.9:126-150	ENST00000257181.9	126	150	3	5	50	-6.2108
ENST00000257181.9:132-150	ENST00000257181.9	132	150	3	5	50	-6.2108
ENST00000257181.9:136-142	ENST00000257181.9	136	142	3	50	3	-6.31999
ENST00000257181.9:16-130	ENST00000257181.9	16	130	45	3	16	5.47066
ENST00000257181.9:43-130	ENST00000257181.9	43	130	45	3	16	5.47066
ENST00000257181.9:46-130	ENST00000257181.9	46	130	45	3	16	5.47066
ENST00000257181.9:63-75	ENST00000257181.9	63	75	15	42	1	-5.5214
ENST00000257245.8:105-114	ENST00000257245.8	105	114	3	33	4	-5.47735
ENST00000257245.8:11-47	ENST00000257245.8	11	47	5	1	1	2.47805
ENST00000257245.8:13-55	ENST00000257245.8	13	55	1	5	1	-2.47805
ENST00000257245.8:22-55	ENST00000257245.8	22	55	1	5	1	-2.47805
ENST00000257435.11:45-171	ENST00000257435.11	45	171	1	13	1	-4.33628
ENST00000257435.11:48-171	ENST00000257435.11	48	171	1	13	1	-4.33628
ENST00000257604.9:111-321	ENST00000257604.9	111	321	10	0	6	3.39232
ENST00000257604.9:153-321	ENST00000257604.9	153	321	9	0	6	3.23266
ENST00000257604.9:155-308	ENST00000257604.9	155	308	6	9	0	-3.23266
ENST00000257604.9:71-308	ENST00000257604.9	71	308	6	12	0	-3.70044
ENST00000257604.9:74-308	ENST00000257604.9	74	308	6	10	0	-3.39232
ENST00000257604.9:92-308	ENST00000257604.9	92	308	6	10	0	-3.39232
ENST00000257604.9:98-308	ENST00000257604.9	98	308	6	10	0	-3.39232
ENST00000257663.3:108-285	ENST00000257663.3	108	285	1	7	27	-5.03437
ENST00000257663.3:150-285	ENST00000257663.3	150	285	1	7	27	-5.03437
ENST00000257663.3:189-285	ENST00000257663.3	189	285	1	7	27	-5.03437
ENST00000257663.3:213-285	ENST00000257663.3	213	285	1	7	23	-4.70223
ENST00000257663.3:216-285	ENST00000257663.3	216	285	1	5	20	-4.59418
ENST00000257663.3:269-368	ENST00000257663.3	269	368	28	10	22	3.23266
ENST00000257663.3:278-368	ENST00000257663.3	278	368	24	9	21	3
ENST00000257663.3:281-368	ENST00000257663.3	281	368	24	9	21	3
ENST00000257663.3:320-368	ENST00000257663.3	320	368	13	8	12	1.18442
ENST00000257694.12:100-202	ENST00000257694.12	100	202	6	7	6	-0.14439
ENST00000257694.12:104-146	ENST00000257694.12	104	146	6	5	3	1
ENST00000257694.12:110-146	ENST00000257694.12	110	146	6	5	3	1
ENST00000257694.12:29-146	ENST00000257694.12	29	146	6	5	5	0.169925
ENST00000257694.12:33-216	ENST00000257694.12	33	216	6	7	7	-0.137504
ENST00000257694.12:60-216	ENST00000257694.12	60	216	6	7	7	-0.137504
ENST00000257694.12:66-216	ENST00000257694.12	66	216	6	7	7	-0.137504
ENST00000257694.12:69-216	ENST00000257694.12	69	216	6	7	7	-0.137504
ENST00000257694.12:81-216	ENST00000257694.12	81	216	6	7	7	-0.137504
ENST00000257694.12:84-216	ENST00000257694.12	84	216	6	7	7	-0.137504
ENST00000257694.12:95-146	ENST00000257694.12	95	146	6	5	5	0.169925
ENST00000257696.4:119-188	ENST00000257696.4	119	188	1	6	0	-3.30117
ENST00000257696.4:26-188	ENST00000257696.4	26	188	1	11	0	-4.2854
ENST00000257696.4:47-188	ENST00000257696.4	47	188	1	11	0	-4.2854
ENST00000257696.4:50-188	ENST00000257696.4	50	188	1	11	0	-4.2854
ENST00000257696.4:80-188	ENST00000257696.4	80	188	1	8	0	-3.77259
ENST00000257696.4:89-188	ENST00000257696.4	89	188	1	6	0	-3.30117
ENST00000257724.7:126-132	ENST00000257724.7	126	132	7	11	0	-3.5025
ENST00000257787.5:126-159	ENST00000257787.5	126	159	4	3	0	2.23704
ENST00000257787.5:129-159	ENST00000257787.5	129	159	4	3	0	2.23704
ENST00000257787.5:16-82	ENST00000257787.5	16	82	11	0	4	3.74416
ENST00000257787.5:2-101	ENST00000257787.5	2	101	0	4	14	-4.1964
ENST00000257787.5:24-159	ENST00000257787.5	24	159	8	17	0	-4.19849
ENST00000257787.5:27-159	ENST00000257787.5	27	159	8	17	0	-4.19849
ENST00000257787.5:52-82	ENST00000257787.5	52	82	11	0	4	3.74416
ENST00000257787.5:6-159	ENST00000257787.5	6	159	8	17	0	-4.19849
ENST00000257787.5:78-159	ENST00000257787.5	78	159	7	14	0	-3.90689
ENST00000257787.5:8-101	ENST00000257787.5	8	101	0	4	14	-4.1964
ENST00000257829.7:143-194	ENST00000257829.7	143	194	4	2	3	0.736966
ENST00000257829.7:164-194	ENST00000257829.7	164	194	4	2	3	0.736966
ENST00000257829.7:32-194	ENST00000257829.7	32	194	4	2	3	0.736966
ENST00000257829.7:41-194	ENST00000257829.7	41	194	4	2	3	0.736966
ENST00000257829.7:89-194	ENST00000257829.7	89	194	4	2	3	0.736966
ENST00000257904.10:113-359	ENST00000257904.10	113	359	3	5	3	-0.788496
ENST00000257904.10:122-359	ENST00000257904.10	122	359	3	5	3	-0.788496
ENST00000257904.10:221-359	ENST00000257904.10	221	359	0	5	3	-2.52356
ENST00000257904.10:242-359	ENST00000257904.10	242	359	0	5	3	-2.52356
ENST00000257904.10:272-359	ENST00000257904.10	272	359	0	5	3	-2.52356
ENST00000257904.10:311-359	ENST00000257904.10	311	359	0	5	3	-2.52356
ENST00000257904.10:80-359	ENST00000257904.10	80	359	3	5	3	-0.788496
ENST00000257904.10:98-359	ENST00000257904.10	98	359	3	5	3	-0.788496
ENST00000257915.9:198-399	ENST00000257915.9	198	399	4	11	6	-2.23704
ENST00000257915.9:216-399	ENST00000257915.9	216	399	4	11	6	-2.23704
ENST00000257915.9:222-399	ENST00000257915.9	222	399	4	11	6	-2.23704
ENST00000257915.9:229-295	ENST00000257915.9	229	295	2	6	0	-3
ENST00000257915.9:252-399	ENST00000257915.9	252	399	4	11	6	-2.23704
ENST00000257915.9:267-399	ENST00000257915.9	267	399	4	11	5	-2.40599
ENST00000257915.9:283-295	ENST00000257915.9	283	295	2	5	0	-2.6845
ENST00000257915.9:295-367	ENST00000257915.9	295	367	5	0	2	2.6845
ENST00000257915.9:297-399	ENST00000257915.9	297	399	4	9	0	-3.37638
ENST00000257915.9:309-399	ENST00000257915.9	309	399	4	8	0	-3.16993
ENST00000257915.9:312-399	ENST00000257915.9	312	399	4	8	0	-3.16993
ENST00000257915.9:342-399	ENST00000257915.9	342	399	4	6	0	-2.72247
ENST00000257915.9:372-399	ENST00000257915.9	372	399	2	4	0	-2.32193
ENST00000258301.5:12-216	ENST00000258301.5	12	216	4	14	5	-3.15592
ENST00000258301.5:51-216	ENST00000258301.5	51	216	4	13	5	-2.93289
ENST00000258301.5:54-216	ENST00000258301.5	54	216	3	13	5	-3.16993
ENST00000258301.5:57-216	ENST00000258301.5	57	216	3	13	5	-3.16993
ENST00000258301.5:87-216	ENST00000258301.5	87	216	3	12	4	-3.11839
ENST00000258301.5:93-216	ENST00000258301.5	93	216	3	12	4	-3.11839
ENST00000258341.4:0-237	ENST00000258341.4	0	237	13	2	7	3.21299
ENST00000258341.4:189-237	ENST00000258341.4	189	237	13	2	0	4.36457
ENST00000258341.4:216-237	ENST00000258341.4	216	237	11	2	0	4.07435
ENST00000258341.4:222-237	ENST00000258341.4	222	237	11	2	0	4.07435
ENST00000258399.7:139-193	ENST00000258399.7	139	193	7	1	2	2.848
ENST00000258399.7:154-193	ENST00000258399.7	154	193	7	1	2	2.848
ENST00000258399.7:184-193	ENST00000258399.7	184	193	7	0	2	3.27302
ENST00000258399.7:189-216	ENST00000258399.7	189	216	2	8	1	-3.14048
ENST00000258399.7:192-216	ENST00000258399.7	192	216	2	8	1	-3.14048
ENST00000258399.7:216-312	ENST00000258399.7	216	312	8	3	1	2.90689
ENST00000258399.7:225-312	ENST00000258399.7	225	312	8	3	1	2.90689
ENST00000258399.7:232-322	ENST00000258399.7	232	322	3	1	4	-1.45943
ENST00000258399.7:246-312	ENST00000258399.7	246	312	4	3	1	1.45943
ENST00000258399.7:251-278	ENST00000258399.7	251	278	1	4	0	-2.63227
ENST00000258399.7:81-216	ENST00000258399.7	81	216	2	8	2	-2.80735
ENST00000258418.9:0-390	ENST00000258418.9	0	390	8	8	10	-0.387023
ENST00000258418.9:189-390	ENST00000258418.9	189	390	6	7	8	-0.36257
ENST00000258418.9:264-390	ENST00000258418.9	264	390	6	7	8	-0.36257
ENST00000258418.9:6-390	ENST00000258418.9	6	390	8	8	10	-0.387023
ENST00000258418.9:63-390	ENST00000258418.9	63	390	8	8	8	0
ENST00000258534.12:152-260	ENST00000258534.12	152	260	3	0	2	1.926
ENST00000258534.12:161-260	ENST00000258534.12	161	260	3	0	2	1.926
ENST00000258534.12:182-260	ENST00000258534.12	182	260	3	0	2	1.926
ENST00000258534.12:185-260	ENST00000258534.12	185	260	3	0	1	2.16993
ENST00000258534.12:236-260	ENST00000258534.12	236	260	3	0	1	2.16993
ENST00000258534.12:256-265	ENST00000258534.12	256	265	1	3	0	-2.16993
ENST00000258534.12:56-260	ENST00000258534.12	56	260	3	0	2	1.926
ENST00000258534.12:65-260	ENST00000258534.12	65	260	3	0	2	1.926
ENST00000258534.12:86-260	ENST00000258534.12	86	260	3	0	2	1.926
ENST00000258729.7:193-310	ENST00000258729.7	193	310	15	39	7	-4.82164
ENST00000258729.7:214-310	ENST00000258729.7	214	310	15	37	7	-4.67482
ENST00000258729.7:216-249	ENST00000258729.7	216	249	3	1	20	-4.82018
ENST00000258729.7:220-310	ENST00000258729.7	220	310	15	37	7	-4.67482
ENST00000258729.7:230-341	ENST00000258729.7	230	341	36	7	15	4.59735
ENST00000258729.7:232-310	ENST00000258729.7	232	310	15	36	7	-4.59735
ENST00000258729.7:236-341	ENST00000258729.7	236	341	33	7	15	4.34663
ENST00000258729.7:238-310	ENST00000258729.7	238	310	15	33	7	-4.34663
ENST00000258729.7:259-310	ENST00000258729.7	259	310	11	14	3	-2.98706
ENST00000258770.7:17-92	ENST00000258770.7	17	92	4	7	3	-1.51457
ENST00000258770.7:68-92	ENST00000258770.7	68	92	2	7	2	-2.47131
ENST00000258781.10:80-86	ENST00000258781.10	80	86	2	8	5	-2.20163
ENST00000258975.6:102-186	ENST00000258975.6	102	186	9	1	9	2.95174
ENST00000258975.6:134-194	ENST00000258975.6	134	194	8	8	1	2.75803
ENST00000258975.6:138-186	ENST00000258975.6	138	186	8	1	8	2.75803
ENST00000258975.6:149-194	ENST00000258975.6	149	194	8	5	1	2.65208
ENST00000258975.6:5-194	ENST00000258975.6	5	194	14	9	1	3.55459
ENST00000258975.6:60-186	ENST00000258975.6	60	186	9	1	14	-3.55459
ENST00000258975.6:63-186	ENST00000258975.6	63	186	9	1	14	-3.55459
ENST00000259154.8:17-122	ENST00000259154.8	17	122	16	14	15	0.180572
ENST00000259154.8:4-100	ENST00000259154.8	4	100	12	8	10	0.847997
ENST00000259154.8:47-122	ENST00000259154.8	47	122	12	12	12	0
ENST00000259154.8:83-122	ENST00000259154.8	83	122	12	8	12	1
ENST00000259239.7:123-276	ENST00000259239.7	123	276	1	4	2	-1.58496
ENST00000259239.7:141-276	ENST00000259239.7	141	276	1	4	2	-1.58496
ENST00000259239.7:160-259	ENST00000259239.7	160	259	4	2	1	1.58496
ENST00000259239.7:166-259	ENST00000259239.7	166	259	3	2	1	1
ENST00000259239.7:183-276	ENST00000259239.7	183	276	1	3	2	-1
ENST00000259239.7:81-276	ENST00000259239.7	81	276	1	4	2	-1.58496
ENST00000259239.7:99-276	ENST00000259239.7	99	276	1	4	2	-1.58496
ENST00000259254.8:34-97	ENST00000259254.8	34	97	6	0	1	3.30117
ENST00000259254.8:54-150	ENST00000259254.8	54	150	1	9	0	-3.96347
ENST00000259895.8:151-175	ENST00000259895.8	151	175	5	14	9	-2.42146
ENST00000259895.8:49-175	ENST00000259895.8	49	175	8	14	11	-1.39855
ENST00000260056.6:10-226	ENST00000260056.6	10	226	8	0	6	3.07529
ENST00000260056.6:101-140	ENST00000260056.6	101	140	0	6	6	-2.80735
ENST00000260056.6:107-140	ENST00000260056.6	107	140	0	6	5	-2.73039
ENST00000260056.6:114-198	ENST00000260056.6	114	198	4	7	0	-2.94996
ENST00000260056.6:118-226	ENST00000260056.6	118	226	7	0	4	2.94996
ENST00000260056.6:123-198	ENST00000260056.6	123	198	4	7	0	-2.94996
ENST00000260056.6:13-226	ENST00000260056.6	13	226	8	0	6	3.07529
ENST00000260056.6:136-226	ENST00000260056.6	136	226	5	0	0	3.45943
ENST00000260056.6:40-226	ENST00000260056.6	40	226	8	0	6	3.07529
ENST00000260056.6:58-226	ENST00000260056.6	58	226	8	0	6	3.07529
ENST00000260129.5:443-476	ENST00000260129.5	443	476	7	13	1	-3.49643
ENST00000260129.5:449-476	ENST00000260129.5	449	476	7	8	1	-2.67243
ENST00000260129.5:458-476	ENST00000260129.5	458	476	7	8	1	-2.67243
ENST00000260187.6:280-292	ENST00000260187.6	280	292	0	2	5	-2.6845
ENST00000260247.9:105-276	ENST00000260247.9	105	276	24	28	46	-3.23391
ENST00000260247.9:111-276	ENST00000260247.9	111	276	22	28	45	-3.32041
ENST00000260247.9:177-276	ENST00000260247.9	177	276	1	16	17	-3.92376
ENST00000260247.9:219-276	ENST00000260247.9	219	276	1	16	15	-3.82655
ENST00000260247.9:228-276	ENST00000260247.9	228	276	1	16	15	-3.82655
ENST00000260247.9:240-276	ENST00000260247.9	240	276	0	16	13	-3.99689
ENST00000260247.9:243-276	ENST00000260247.9	243	276	0	16	12	-3.98706
ENST00000260247.9:246-276	ENST00000260247.9	246	276	0	13	12	-3.76129
ENST00000260247.9:252-276	ENST00000260247.9	252	276	0	12	11	-3.65136
ENST00000260247.9:66-276	ENST00000260247.9	66	276	27	33	54	-3.53343
ENST00000260247.9:69-276	ENST00000260247.9	69	276	27	32	54	-3.57963
ENST00000260247.9:75-276	ENST00000260247.9	75	276	27	32	54	-3.57963
ENST00000260361.8:121-229	ENST00000260361.8	121	229	1	7	2	-2.848
ENST00000260361.8:157-229	ENST00000260361.8	157	229	1	7	2	-2.848
ENST00000260361.8:20-104	ENST00000260361.8	20	104	5	0	1	3
ENST00000260361.8:23-104	ENST00000260361.8	23	104	5	0	1	3
ENST00000260403.6:130-190	ENST00000260403.6	130	190	0	6	0	-3.70044
ENST00000260403.6:172-190	ENST00000260403.6	172	190	0	6	0	-3.70044
ENST00000260403.6:178-190	ENST00000260403.6	178	190	0	6	0	-3.70044
ENST00000260502.10:105-174	ENST00000260502.10	105	174	3	3	0	2
ENST00000260506.12:95-113	ENST00000260506.12	95	113	7	17	2	-3.85415
ENST00000260643.6:2-80	ENST00000260643.6	2	80	0	0	11	-4.52356
ENST00000260643.6:27-129	ENST00000260643.6	27	129	0	11	0	-4.52356
ENST00000260643.6:33-129	ENST00000260643.6	33	129	0	11	0	-4.52356
ENST00000260643.6:40-190	ENST00000260643.6	40	190	11	0	0	4.52356
ENST00000260643.6:48-129	ENST00000260643.6	48	129	0	11	0	-4.52356
ENST00000260662.2:6-126	ENST00000260662.2	6	126	2	13	2	-3.92935
ENST00000260803.8:26-116	ENST00000260803.8	26	116	6	2	0	3
ENST00000260803.8:68-116	ENST00000260803.8	68	116	4	2	0	2.32193
ENST00000260952.8:101-392	ENST00000260952.8	101	392	6	6	4	0.584963
ENST00000260952.8:116-392	ENST00000260952.8	116	392	6	6	4	0.584963
ENST00000260952.8:137-392	ENST00000260952.8	137	392	6	6	4	0.584963
ENST00000260952.8:140-392	ENST00000260952.8	140	392	6	6	4	0.584963
ENST00000260952.8:207-339	ENST00000260952.8	207	339	6	4	6	0.584963
ENST00000260952.8:209-392	ENST00000260952.8	209	392	6	6	4	0.584963
ENST00000260952.8:212-392	ENST00000260952.8	212	392	6	6	4	0.584963
ENST00000260952.8:216-339	ENST00000260952.8	216	339	6	4	6	0.584963
ENST00000260952.8:86-392	ENST00000260952.8	86	392	6	6	4	0.584963
ENST00000260952.8:95-392	ENST00000260952.8	95	392	6	6	4	0.584963
ENST00000260956.8:100-163	ENST00000260956.8	100	163	48	30	25	3.25161
ENST00000260956.8:109-163	ENST00000260956.8	109	163	46	26	25	3.27507
ENST00000260956.8:112-163	ENST00000260956.8	112	163	46	26	25	3.27507
ENST00000260956.8:115-163	ENST00000260956.8	115	163	45	26	25	3.15987
ENST00000260956.8:118-163	ENST00000260956.8	118	163	45	26	25	3.15987
ENST00000260956.8:122-128	ENST00000260956.8	122	128	5	13	3	-3.16993
ENST00000260956.8:124-163	ENST00000260956.8	124	163	40	23	12	4.08066
ENST00000260956.8:130-163	ENST00000260956.8	130	163	37	21	9	4.22278
ENST00000260956.8:14-128	ENST00000260956.8	14	128	11	20	13	-2.0163
ENST00000260956.8:20-128	ENST00000260956.8	20	128	11	20	13	-2.0163
ENST00000260956.8:50-128	ENST00000260956.8	50	128	11	20	13	-2.0163
ENST00000260956.8:65-128	ENST00000260956.8	65	128	11	20	13	-2.0163
ENST00000260956.8:80-128	ENST00000260956.8	80	128	11	17	12	-1.3505
ENST00000261015.4:107-167	ENST00000261015.4	107	167	1	8	1	-3.43296
ENST00000261015.4:114-198	ENST00000261015.4	114	198	8	5	1	2.65208
ENST00000261015.4:122-167	ENST00000261015.4	122	167	1	8	1	-3.43296
ENST00000261015.4:126-198	ENST00000261015.4	126	198	8	5	1	2.65208
ENST00000261015.4:134-167	ENST00000261015.4	134	167	1	8	1	-3.43296
ENST00000261015.4:138-198	ENST00000261015.4	138	198	8	5	1	2.65208
ENST00000261015.4:152-167	ENST00000261015.4	152	167	1	8	1	-3.43296
ENST00000261015.4:194-311	ENST00000261015.4	194	311	2	17	9	-3.70834
ENST00000261015.4:224-311	ENST00000261015.4	224	311	2	17	9	-3.70834
ENST00000261015.4:251-311	ENST00000261015.4	251	311	2	17	9	-3.70834
ENST00000261015.4:277-340	ENST00000261015.4	277	340	11	2	15	-3.39232
ENST00000261015.4:290-311	ENST00000261015.4	290	311	2	11	9	-2.82597
ENST00000261015.4:300-327	ENST00000261015.4	300	327	11	11	2	2.9542
ENST00000261015.4:330-513	ENST00000261015.4	330	513	7	17	0	-4.26679
ENST00000261015.4:336-513	ENST00000261015.4	336	513	7	17	0	-4.26679
ENST00000261015.4:396-513	ENST00000261015.4	396	513	7	17	0	-4.26679
ENST00000261015.4:434-464	ENST00000261015.4	434	464	0	3	10	-3.71741
ENST00000261015.4:438-513	ENST00000261015.4	438	513	7	17	0	-4.26679
ENST00000261015.4:456-513	ENST00000261015.4	456	513	6	17	0	-4.34988
ENST00000261015.4:470-506	ENST00000261015.4	470	506	0	4	5	-2.5025
ENST00000261015.4:502-529	ENST00000261015.4	502	529	3	0	1	2.16993
ENST00000261015.4:569-710	ENST00000261015.4	569	710	7	4	21	-4.03892
ENST00000261015.4:620-710	ENST00000261015.4	620	710	7	4	21	-4.03892
ENST00000261015.4:638-710	ENST00000261015.4	638	710	7	4	20	-3.90689
ENST00000261015.4:653-710	ENST00000261015.4	653	710	7	4	20	-3.90689
ENST00000261015.4:666-672	ENST00000261015.4	666	672	0	15	0	-4.9542
ENST00000261015.4:692-710	ENST00000261015.4	692	710	4	3	0	2.23704
ENST00000261015.4:695-710	ENST00000261015.4	695	710	4	2	0	2.32193
ENST00000261017.9:102-210	ENST00000261017.9	102	210	7	5	2	1.89308
ENST00000261017.9:33-210	ENST00000261017.9	33	210	7	7	2	2.04439
ENST00000261017.9:86-233	ENST00000261017.9	86	233	2	8	7	-2.21632
ENST00000261017.9:96-210	ENST00000261017.9	96	210	7	5	2	1.89308
ENST00000261023.7:77-149	ENST00000261023.7	77	149	1	20	1	-5.07973
ENST00000261023.7:92-149	ENST00000261023.7	92	149	1	20	1	-5.07973
ENST00000261034.6:105-165	ENST00000261034.6	105	165	6	14	0	-3.98185
ENST00000261034.6:150-165	ENST00000261034.6	150	165	6	14	0	-3.98185
ENST00000261038.5:214-355	ENST00000261038.5	214	355	2	2	4	-1
ENST00000261038.5:313-355	ENST00000261038.5	313	355	2	2	4	-1
ENST00000261038.5:316-355	ENST00000261038.5	316	355	2	2	4	-1
ENST00000261038.5:331-355	ENST00000261038.5	331	355	2	2	4	-1
ENST00000261070.6:17-53	ENST00000261070.6	17	53	6	15	5	-3
ENST00000261070.6:23-53	ENST00000261070.6	23	53	3	15	5	-3.55859
ENST00000261070.6:35-53	ENST00000261070.6	35	53	3	15	2	-4.06178
ENST00000261070.6:44-53	ENST00000261070.6	44	53	3	15	2	-4.06178
ENST00000261191.11:496-529	ENST00000261191.11	496	529	4	0	4	2.32193
ENST00000261191.11:514-529	ENST00000261191.11	514	529	4	0	4	2.32193
ENST00000261234.10:123-141	ENST00000261234.10	123	141	5	8	2	-2.20163
ENST00000261234.10:129-141	ENST00000261234.10	129	141	5	8	2	-2.20163
ENST00000261234.10:48-141	ENST00000261234.10	48	141	5	8	3	-1.75489
ENST00000261249.6:21-339	ENST00000261249.6	21	339	8	4	6	1.22239
ENST00000261249.6:24-339	ENST00000261249.6	24	339	7	4	6	0.866733
ENST00000261249.6:55-97	ENST00000261249.6	55	97	2	2	4	-1
ENST00000261249.6:71-236	ENST00000261249.6	71	236	5	6	2	-1.58496
ENST00000261249.6:93-339	ENST00000261249.6	93	339	2	2	3	-0.36257
ENST00000261263.4:127-190	ENST00000261263.4	127	190	2	1	2	0.485427
ENST00000261263.4:169-190	ENST00000261263.4	169	190	1	1	2	-0.584963
ENST00000261263.4:55-190	ENST00000261263.4	55	190	9	19	66	-5.90996
ENST00000261263.4:58-190	ENST00000261263.4	58	190	9	17	66	-5.97977
ENST00000261263.4:68-173	ENST00000261263.4	68	173	13	62	5	-6.17842
ENST00000261388.7:10-172	ENST00000261388.7	10	172	4	3	2	0.736966
ENST00000261388.7:29-140	ENST00000261388.7	29	140	3	2	4	-0.736966
ENST00000261388.7:35-140	ENST00000261388.7	35	140	3	2	4	-0.736966
ENST00000261388.7:40-172	ENST00000261388.7	40	172	4	3	2	0.736966
ENST00000261388.7:47-140	ENST00000261388.7	47	140	2	2	4	-1
ENST00000261402.6:104-1289	ENST00000261402.6	104	1289	3	8	9	-2.03562
ENST00000261402.6:1070-1289	ENST00000261402.6	1070	1289	1	5	9	-2.88753
ENST00000261402.6:1096-1357	ENST00000261402.6	1096	1357	9	1	5	2.88753
ENST00000261402.6:1117-1357	ENST00000261402.6	1117	1357	9	1	5	2.88753
ENST00000261402.6:1141-1357	ENST00000261402.6	1141	1357	9	1	5	2.88753
ENST00000261402.6:1172-1289	ENST00000261402.6	1172	1289	1	5	9	-2.88753
ENST00000261402.6:1183-1357	ENST00000261402.6	1183	1357	9	1	5	2.88753
ENST00000261402.6:1205-1289	ENST00000261402.6	1205	1289	1	5	9	-2.88753
ENST00000261402.6:365-1289	ENST00000261402.6	365	1289	3	8	9	-2.03562
ENST00000261402.6:44-1289	ENST00000261402.6	44	1289	3	8	9	-2.03562
ENST00000261402.6:482-1289	ENST00000261402.6	482	1289	3	8	9	-2.03562
ENST00000261402.6:512-1289	ENST00000261402.6	512	1289	3	8	9	-2.03562
ENST00000261402.6:875-1289	ENST00000261402.6	875	1289	1	5	9	-2.88753
ENST00000261402.6:899-1289	ENST00000261402.6	899	1289	1	5	9	-2.88753
ENST00000261402.6:932-1289	ENST00000261402.6	932	1289	1	5	9	-2.88753
[truncated: 16,438 more rows]

## Sheet: DHX36 samples
uORF_id	TransID	uORFstart	uORFstop	frame1_DHX36	frame2_DHX36	frame3_DHX36	DHX36_uORFScore
ENST00000001008.5:47-116	ENST00000001008.5	47	116	0	3	3	-2
ENST00000001008.5:77-116	ENST00000001008.5	77	116	0	2	3	-1.926
ENST00000005257.6:290-365	ENST00000005257.6	290	365	7	42	6	-5.55012
ENST00000005257.6:51-354	ENST00000005257.6	51	354	7	4	4	1.1375
ENST00000005257.6:6-354	ENST00000005257.6	6	354	7	4	4	1.1375
ENST00000005257.6:87-354	ENST00000005257.6	87	354	7	4	4	1.1375
ENST00000005257.6:89-365	ENST00000005257.6	89	365	8	42	8	-5.35269
ENST00000005257.6:96-354	ENST00000005257.6	96	354	7	4	4	1.1375
ENST00000005257.6:99-354	ENST00000005257.6	99	354	7	4	4	1.1375
ENST00000008527.9:261-633	ENST00000008527.9	261	633	3	15	7	-3.31615
ENST00000008527.9:264-633	ENST00000008527.9	264	633	3	15	7	-3.31615
ENST00000008527.9:429-633	ENST00000008527.9	429	633	2	15	7	-3.55459
ENST00000008527.9:453-633	ENST00000008527.9	453	633	1	14	7	-3.64909
ENST00000008527.9:471-633	ENST00000008527.9	471	633	1	14	7	-3.64909
ENST00000008527.9:474-633	ENST00000008527.9	474	633	1	14	7	-3.64909
ENST00000008527.9:490-814	ENST00000008527.9	490	814	14	8	1	3.59018
ENST00000008527.9:493-814	ENST00000008527.9	493	814	14	7	1	3.64909
ENST00000008527.9:502-814	ENST00000008527.9	502	814	14	7	1	3.64909
ENST00000008527.9:514-814	ENST00000008527.9	514	814	13	3	1	3.96239
ENST00000008527.9:532-814	ENST00000008527.9	532	814	12	3	1	3.79442
ENST00000008527.9:548-779	ENST00000008527.9	548	779	0	1	12	-4.42368
ENST00000008527.9:555-633	ENST00000008527.9	555	633	1	11	0	-4.2854
ENST00000008527.9:591-633	ENST00000008527.9	591	633	0	6	0	-3.70044
ENST00000013807.9:13-112	ENST00000013807.9	13	112	1	2	1	-0.584963
ENST00000013807.9:53-137	ENST00000013807.9	53	137	3	1	1	1.37851
ENST00000013807.9:68-137	ENST00000013807.9	68	137	3	1	1	1.37851
ENST00000013807.9:71-137	ENST00000013807.9	71	137	3	1	1	1.37851
ENST00000013807.9:76-112	ENST00000013807.9	76	112	1	2	1	-0.584963
ENST00000014914.5:107-599	ENST00000014914.5	107	599	4	6	1	-2.15528
ENST00000014914.5:110-599	ENST00000014914.5	110	599	4	6	1	-2.15528
ENST00000014914.5:131-599	ENST00000014914.5	131	599	4	6	1	-2.15528
ENST00000014914.5:176-599	ENST00000014914.5	176	599	4	6	0	-2.72247
ENST00000014914.5:191-599	ENST00000014914.5	191	599	4	6	0	-2.72247
ENST00000014914.5:215-599	ENST00000014914.5	215	599	4	6	0	-2.72247
ENST00000014914.5:227-599	ENST00000014914.5	227	599	4	6	0	-2.72247
ENST00000014914.5:275-599	ENST00000014914.5	275	599	4	6	0	-2.72247
ENST00000014914.5:287-599	ENST00000014914.5	287	599	4	6	0	-2.72247
ENST00000014914.5:296-599	ENST00000014914.5	296	599	4	6	0	-2.72247
ENST00000014914.5:311-599	ENST00000014914.5	311	599	4	6	0	-2.72247
ENST00000014914.5:329-599	ENST00000014914.5	329	599	4	6	0	-2.72247
ENST00000014914.5:335-599	ENST00000014914.5	335	599	3	6	0	-2.80735
ENST00000014914.5:356-599	ENST00000014914.5	356	599	3	6	0	-2.80735
ENST00000014914.5:362-599	ENST00000014914.5	362	599	3	6	0	-2.80735
ENST00000014914.5:398-599	ENST00000014914.5	398	599	3	6	0	-2.80735
ENST00000014914.5:440-599	ENST00000014914.5	440	599	3	2	0	1.926
ENST00000014914.5:476-599	ENST00000014914.5	476	599	3	2	0	1.926
ENST00000014914.5:488-599	ENST00000014914.5	488	599	3	2	0	1.926
ENST00000014914.5:493-511	ENST00000014914.5	493	511	0	3	1	-2.16993
ENST00000014914.5:495-582	ENST00000014914.5	495	582	2	0	3	-1.926
ENST00000014914.5:59-599	ENST00000014914.5	59	599	4	6	1	-2.15528
ENST00000014914.5:8-599	ENST00000014914.5	8	599	4	6	1	-2.15528
ENST00000014914.5:802-886	ENST00000014914.5	802	886	14	4	79	-6.69456
ENST00000014914.5:814-886	ENST00000014914.5	814	886	14	2	78	-6.74891
ENST00000014914.5:834-870	ENST00000014914.5	834	870	44	7	2	5.92089
ENST00000014914.5:846-870	ENST00000014914.5	846	870	40	7	2	5.73347
ENST00000014914.5:852-870	ENST00000014914.5	852	870	40	7	2	5.73347
ENST00000014914.5:856-886	ENST00000014914.5	856	886	10	2	74	-6.77678
ENST00000014914.5:92-599	ENST00000014914.5	92	599	4	6	1	-2.15528
ENST00000014914.5:98-599	ENST00000014914.5	98	599	4	6	1	-2.15528
ENST00000019317.8:12-174	ENST00000019317.8	12	174	4	1	2	1.58496
ENST00000019317.8:16-70	ENST00000019317.8	16	70	0	2	2	-1.58496
ENST00000019317.8:21-174	ENST00000019317.8	21	174	4	1	2	1.58496
ENST00000035307.6:1086-1158	ENST00000035307.6	1086	1158	2	0	4	-2.32193
ENST00000035307.6:1113-1158	ENST00000035307.6	1113	1158	2	0	4	-2.32193
ENST00000035307.6:1116-1158	ENST00000035307.6	1116	1158	2	0	4	-2.32193
ENST00000035307.6:12-309	ENST00000035307.6	12	309	26	18	4	4.04439
ENST00000035307.6:150-309	ENST00000035307.6	150	309	26	14	3	4.28282
ENST00000035307.6:201-309	ENST00000035307.6	201	309	26	14	1	4.57761
ENST00000035307.6:230-410	ENST00000035307.6	230	410	7	42	16	-4.97693
ENST00000035307.6:243-309	ENST00000035307.6	243	309	26	14	1	4.57761
ENST00000035307.6:249-309	ENST00000035307.6	249	309	26	12	1	4.65271
ENST00000035307.6:266-410	ENST00000035307.6	266	410	7	42	12	-5.17975
ENST00000035307.6:269-410	ENST00000035307.6	269	410	7	24	12	-3.5424
ENST00000035307.6:275-410	ENST00000035307.6	275	410	7	24	11	-3.61891
ENST00000035307.6:305-410	ENST00000035307.6	305	410	6	18	2	-4.08746
ENST00000035307.6:311-410	ENST00000035307.6	311	410	6	16	2	-3.80735
ENST00000035307.6:318-435	ENST00000035307.6	318	435	16	3	7	3.48938
ENST00000035307.6:320-410	ENST00000035307.6	320	410	6	16	2	-3.80735
ENST00000035307.6:364-862	ENST00000035307.6	364	862	20	23	46	-3.87189
ENST00000035307.6:406-862	ENST00000035307.6	406	862	19	20	42	-3.75687
ENST00000035307.6:409-862	ENST00000035307.6	409	862	19	20	42	-3.75687
ENST00000035307.6:436-862	ENST00000035307.6	436	862	18	19	42	-3.90689
ENST00000035307.6:481-862	ENST00000035307.6	481	862	17	17	39	-3.83393
ENST00000035307.6:514-862	ENST00000035307.6	514	862	16	12	38	-4.23406
ENST00000035307.6:54-309	ENST00000035307.6	54	309	26	18	4	4.04439
ENST00000035307.6:562-862	ENST00000035307.6	562	862	12	11	38	-4.58792
ENST00000035307.6:594-774	ENST00000035307.6	594	774	25	9	6	4.05745
ENST00000035307.6:597-774	ENST00000035307.6	597	774	25	9	6	4.05745
ENST00000035307.6:601-862	ENST00000035307.6	601	862	11	11	36	-4.49517
ENST00000035307.6:603-774	ENST00000035307.6	603	774	25	9	6	4.05745
ENST00000035307.6:625-862	ENST00000035307.6	625	862	11	10	34	-4.39979
ENST00000035307.6:634-862	ENST00000035307.6	634	862	11	10	34	-4.39979
ENST00000035307.6:649-862	ENST00000035307.6	649	862	11	10	34	-4.39979
ENST00000035307.6:699-774	ENST00000035307.6	699	774	23	4	5	4.48784
ENST00000035307.6:702-774	ENST00000035307.6	702	774	23	4	5	4.48784
ENST00000035307.6:717-774	ENST00000035307.6	717	774	23	4	5	4.48784
ENST00000035307.6:734-791	ENST00000035307.6	734	791	4	34	6	-5.29879
ENST00000035307.6:739-862	ENST00000035307.6	739	862	4	8	11	-2.07635
ENST00000035307.6:746-791	ENST00000035307.6	746	791	3	11	3	-3.09245
ENST00000035307.6:761-791	ENST00000035307.6	761	791	0	11	3	-3.89308
ENST00000035307.6:770-791	ENST00000035307.6	770	791	0	11	2	-4.07435
ENST00000035307.6:778-862	ENST00000035307.6	778	862	2	5	11	-3
ENST00000035307.6:784-862	ENST00000035307.6	784	862	2	5	10	-2.75803
ENST00000035307.6:81-309	ENST00000035307.6	81	309	26	18	4	4.04439
ENST00000035307.6:99-309	ENST00000035307.6	99	309	26	16	3	4.22754
ENST00000046640.7:109-334	ENST00000046640.7	109	334	5	0	1	3
ENST00000046640.7:127-334	ENST00000046640.7	127	334	5	0	1	3
ENST00000046640.7:148-334	ENST00000046640.7	148	334	5	0	1	3
ENST00000046640.7:285-501	ENST00000046640.7	285	501	5	29	5	-4.93256
ENST00000046640.7:309-501	ENST00000046640.7	309	501	5	29	5	-4.93256
ENST00000046640.7:321-501	ENST00000046640.7	321	501	5	29	5	-4.93256
ENST00000046640.7:330-501	ENST00000046640.7	330	501	5	25	5	-4.57635
ENST00000046640.7:37-334	ENST00000046640.7	37	334	5	0	1	3
ENST00000046640.7:370-520	ENST00000046640.7	370	520	25	6	4	4.58668
ENST00000046640.7:376-520	ENST00000046640.7	376	520	19	6	2	4.21378
ENST00000046640.7:379-520	ENST00000046640.7	379	520	19	6	2	4.21378
ENST00000046640.7:391-520	ENST00000046640.7	391	520	18	4	2	4.32193
ENST00000046640.7:406-520	ENST00000046640.7	406	520	8	4	2	2.32193
ENST00000046640.7:409-520	ENST00000046640.7	409	520	7	4	2	1.97199
ENST00000046640.7:411-501	ENST00000046640.7	411	501	2	7	3	-2.16993
ENST00000046640.7:418-520	ENST00000046640.7	418	520	7	4	2	1.97199
ENST00000046640.7:436-520	ENST00000046640.7	436	520	7	4	1	2.45943
ENST00000046640.7:445-520	ENST00000046640.7	445	520	7	4	1	2.45943
ENST00000046640.7:478-520	ENST00000046640.7	478	520	5	2	0	2.6845
ENST00000046640.7:497-545	ENST00000046640.7	497	545	2	0	1	1.58496
ENST00000046640.7:76-334	ENST00000046640.7	76	334	5	0	1	3
ENST00000052569.10:101-134	ENST00000052569.10	101	134	5	41	3	-5.83289
ENST00000052569.10:110-134	ENST00000052569.10	110	134	0	6	3	-2.80735
ENST00000052569.10:25-124	ENST00000052569.10	25	124	12	7	42	-5.17975
ENST00000052569.10:38-134	ENST00000052569.10	38	134	6	42	10	-5.36723
ENST00000052569.10:50-134	ENST00000052569.10	50	134	6	42	10	-5.36723
ENST00000052569.10:79-124	ENST00000052569.10	79	124	10	5	42	-5.44032
ENST00000052569.10:89-134	ENST00000052569.10	89	134	5	41	6	-5.62936
ENST00000052569.10:93-111	ENST00000052569.10	93	111	41	1	5	5.97631
ENST00000052569.10:95-134	ENST00000052569.10	95	134	5	41	4	-5.76341
ENST00000052569.10:98-134	ENST00000052569.10	98	134	5	41	3	-5.83289
ENST00000061240.6:27-261	ENST00000061240.6	27	261	3	5	6	-1
ENST00000061240.6:9-261	ENST00000061240.6	9	261	3	5	6	-1
ENST00000075120.11:0-126	ENST00000075120.11	0	126	1	1	40	-6.19827
ENST00000075120.11:100-151	ENST00000075120.11	100	151	1	43	5	-6.06169
ENST00000075120.11:111-126	ENST00000075120.11	111	126	1	1	35	-5.98838
ENST00000075120.11:122-227	ENST00000075120.11	122	227	44	13	4	5.46961
ENST00000075120.11:128-227	ENST00000075120.11	128	227	12	12	4	2.47805
ENST00000075120.11:130-151	ENST00000075120.11	130	151	0	7	3	-3.07039
ENST00000075120.11:161-227	ENST00000075120.11	161	227	4	8	4	-1.58496
ENST00000075120.11:170-227	ENST00000075120.11	170	227	4	8	4	-1.58496
ENST00000075120.11:173-227	ENST00000075120.11	173	227	4	8	4	-1.58496
ENST00000075120.11:177-219	ENST00000075120.11	177	219	8	4	0	3.16993
ENST00000075120.11:186-219	ENST00000075120.11	186	219	7	4	0	2.94996
ENST00000075120.11:192-219	ENST00000075120.11	192	219	4	3	0	2.23704
ENST00000075120.11:215-227	ENST00000075120.11	215	227	4	1	0	2.63227
ENST00000075120.11:223-232	ENST00000075120.11	223	232	0	4	1	-2.63227
ENST00000075120.11:24-126	ENST00000075120.11	24	126	1	1	40	-6.19827
ENST00000075120.11:70-151	ENST00000075120.11	70	151	1	48	5	-6.25634
ENST00000084798.8:25-76	ENST00000084798.8	25	76	2	2	1	0.485427
ENST00000162391.7:1026-1056	ENST00000162391.7	1026	1056	11	3	0	3.89308
ENST00000162391.7:1032-1056	ENST00000162391.7	1032	1056	11	3	0	3.89308
ENST00000162391.7:11-494	ENST00000162391.7	11	494	3	6	21	-4.29278
ENST00000162391.7:131-494	ENST00000162391.7	131	494	3	6	20	-4.17269
ENST00000162391.7:263-494	ENST00000162391.7	263	494	2	6	9	-2.42033
ENST00000162391.7:332-494	ENST00000162391.7	332	494	2	6	8	-2.16993
ENST00000162391.7:335-494	ENST00000162391.7	335	494	2	6	8	-2.16993
ENST00000162391.7:383-494	ENST00000162391.7	383	494	2	4	4	-0.847997
ENST00000162391.7:392-494	ENST00000162391.7	392	494	2	4	4	-0.847997
ENST00000162391.7:403-481	ENST00000162391.7	403	481	3	2	4	-0.736966
ENST00000162391.7:426-879	ENST00000162391.7	426	879	20	8	10	2.91194
ENST00000162391.7:456-879	ENST00000162391.7	456	879	18	7	10	2.70992
ENST00000162391.7:566-722	ENST00000162391.7	566	722	6	15	1	-3.88042
ENST00000162391.7:572-722	ENST00000162391.7	572	722	2	8	1	-3.14048
ENST00000162391.7:578-722	ENST00000162391.7	578	722	1	8	1	-3.43296
ENST00000162391.7:631-1030	ENST00000162391.7	631	1030	4	2	8	-2.32193
ENST00000162391.7:680-722	ENST00000162391.7	680	722	0	2	1	-1.58496
ENST00000162391.7:714-879	ENST00000162391.7	714	879	2	4	2	-1
ENST00000162391.7:730-1030	ENST00000162391.7	730	1030	3	2	3	0.321928
ENST00000162391.7:735-879	ENST00000162391.7	735	879	1	3	2	-1
ENST00000162749.6:100-154	ENST00000162749.6	100	154	28	6	13	4.09826
ENST00000162749.6:114-291	ENST00000162749.6	114	291	55	90	11	-5.93709
ENST00000162749.6:12-291	ENST00000162749.6	12	291	58	92	14	-5.83165
ENST00000162749.6:121-154	ENST00000162749.6	121	154	27	4	10	4.44819
ENST00000162749.6:137-263	ENST00000162749.6	137	263	4	13	59	-6.1233
ENST00000162749.6:150-291	ENST00000162749.6	150	291	42	68	7	-5.61622
ENST00000162749.6:159-291	ENST00000162749.6	159	291	42	63	7	-5.45533
ENST00000162749.6:198-291	ENST00000162749.6	198	291	41	22	6	4.79159
ENST00000162749.6:240-291	ENST00000162749.6	240	291	37	14	6	4.82085
ENST00000162749.6:246-291	ENST00000162749.6	246	291	37	12	6	4.93031
ENST00000162749.6:269-281	ENST00000162749.6	269	281	3	35	5	-5.51845
ENST00000162749.6:31-154	ENST00000162749.6	31	154	29	7	16	3.91795
ENST00000164305.9:116-230	ENST00000164305.9	116	230	21	12	2	4.04314
ENST00000164305.9:146-230	ENST00000164305.9	146	230	21	12	2	4.04314
ENST00000164305.9:194-230	ENST00000164305.9	194	230	21	5	2	4.54579
ENST00000164305.9:203-230	ENST00000164305.9	203	230	18	5	2	4.19849
ENST00000164305.9:229-274	ENST00000164305.9	229	274	7	19	6	-3.43463
ENST00000166345.7:118-274	ENST00000166345.7	118	274	2	2	0	1.58496
ENST00000166345.7:13-274	ENST00000166345.7	13	274	2	2	0	1.58496
ENST00000166345.7:157-274	ENST00000166345.7	157	274	2	2	0	1.58496
ENST00000166345.7:46-274	ENST00000166345.7	46	274	2	2	0	1.58496
ENST00000166345.7:7-274	ENST00000166345.7	7	274	2	2	0	1.58496
ENST00000166345.7:91-274	ENST00000166345.7	91	274	2	2	0	1.58496
ENST00000166345.7:97-274	ENST00000166345.7	97	274	2	2	0	1.58496
ENST00000175091.4:301-445	ENST00000175091.4	301	445	9	8	20	-3.03372
ENST00000175091.4:310-445	ENST00000175091.4	310	445	7	7	20	-3.4517
ENST00000175091.4:370-445	ENST00000175091.4	370	445	7	7	20	-3.4517
ENST00000175091.4:412-445	ENST00000175091.4	412	445	4	4	15	-3.52629
ENST00000181839.8:102-168	ENST00000181839.8	102	168	2	10	3	-3.10434
ENST00000181839.8:128-602	ENST00000181839.8	128	602	0	6	10	-3.39232
ENST00000181839.8:136-352	ENST00000181839.8	136	352	10	0	5	3.45943
ENST00000181839.8:139-352	ENST00000181839.8	139	352	10	0	5	3.45943
ENST00000181839.8:142-352	ENST00000181839.8	142	352	10	0	5	3.45943
ENST00000181839.8:164-602	ENST00000181839.8	164	602	0	5	10	-3.45943
ENST00000181839.8:17-602	ENST00000181839.8	17	602	3	9	20	-3.90087
ENST00000181839.8:170-602	ENST00000181839.8	170	602	0	5	9	-3.28011
ENST00000181839.8:179-602	ENST00000181839.8	179	602	0	5	9	-3.28011
ENST00000181839.8:41-602	ENST00000181839.8	41	602	3	9	20	-3.90087
ENST00000181839.8:44-602	ENST00000181839.8	44	602	3	9	20	-3.90087
ENST00000181839.8:73-352	ENST00000181839.8	73	352	20	3	7	4.07039
ENST00000181839.8:78-168	ENST00000181839.8	78	168	2	11	3	-3.33985
ENST00000181839.8:80-602	ENST00000181839.8	80	602	3	7	20	-4.07039
ENST00000186436.9:24-45	ENST00000186436.9	24	45	5	17	6	-3.39232
ENST00000199448.8:131-374	ENST00000199448.8	131	374	3	16	20	-3.71741
ENST00000199448.8:80-374	ENST00000199448.8	80	374	3	16	20	-3.71741
ENST00000200453.5:101-155	ENST00000200453.5	101	155	0	7	8	-3.10434
ENST00000200453.5:108-132	ENST00000200453.5	108	132	1	8	0	-3.77259
ENST00000200453.5:147-243	ENST00000200453.5	147	243	4	9	0	-3.37638
ENST00000200453.5:151-166	ENST00000200453.5	151	166	6	0	0	3.70044
ENST00000200453.5:157-166	ENST00000200453.5	157	166	6	0	0	3.70044
ENST00000200453.5:162-243	ENST00000200453.5	162	243	0	9	0	-4.24793
ENST00000200453.5:18-132	ENST00000200453.5	18	132	3	37	0	-6.00787
ENST00000200453.5:27-132	ENST00000200453.5	27	132	3	37	0	-6.00787
ENST00000200453.5:63-132	ENST00000200453.5	63	132	3	37	0	-6.00787
ENST00000200453.5:77-155	ENST00000200453.5	77	155	0	8	17	-4.19849
ENST00000200453.5:93-132	ENST00000200453.5	93	132	1	8	0	-3.77259
ENST00000201031.2:49-106	ENST00000201031.2	49	106	12	15	2	-3.40411
ENST00000201031.2:73-106	ENST00000201031.2	73	106	12	15	2	-3.40411
ENST00000201031.2:91-106	ENST00000201031.2	91	106	11	15	2	-3.39232
ENST00000204517.10:126-288	ENST00000204517.10	126	288	1	3	1	-1.37851
ENST00000204517.10:15-288	ENST00000204517.10	15	288	4	4	2	0.847997
ENST00000204517.10:18-288	ENST00000204517.10	18	288	4	4	2	0.847997
ENST00000204517.10:228-288	ENST00000204517.10	228	288	1	2	1	-0.584963
ENST00000204517.10:246-288	ENST00000204517.10	246	288	1	2	1	-0.584963
ENST00000204517.10:33-288	ENST00000204517.10	33	288	4	4	2	0.847997
ENST00000204517.10:45-288	ENST00000204517.10	45	288	4	4	2	0.847997
ENST00000204517.10:66-288	ENST00000204517.10	66	288	2	4	1	-1.58496
ENST00000209728.8:400-457	ENST00000209728.8	400	457	7	11	1	-3.16993
ENST00000209728.8:409-457	ENST00000209728.8	409	457	7	11	1	-3.16993
ENST00000209728.8:427-457	ENST00000209728.8	427	457	7	11	1	-3.16993
ENST00000209875.8:0-75	ENST00000209875.8	0	75	71	21	95	-5.54636
ENST00000209875.8:28-70	ENST00000209875.8	28	70	21	85	7	-6.53641
ENST00000209875.8:30-75	ENST00000209875.8	30	75	69	21	95	-5.5456
ENST00000209875.8:33-75	ENST00000209875.8	33	75	69	21	95	-5.5456
ENST00000209875.8:63-75	ENST00000209875.8	63	75	69	2	20	6.32687
ENST00000211314.4:16-121	ENST00000211314.4	16	121	17	0	7	4.26679
ENST00000215115.4:11-455	ENST00000215115.4	11	455	8	2	0	3.51096
ENST00000215115.4:146-455	ENST00000215115.4	146	455	8	2	0	3.51096
ENST00000215115.4:158-455	ENST00000215115.4	158	455	8	2	0	3.51096
ENST00000215115.4:17-455	ENST00000215115.4	17	455	8	2	0	3.51096
ENST00000215115.4:191-455	ENST00000215115.4	191	455	8	2	0	3.51096
ENST00000215115.4:194-455	ENST00000215115.4	194	455	8	2	0	3.51096
ENST00000215115.4:20-455	ENST00000215115.4	20	455	8	2	0	3.51096
ENST00000215115.4:215-455	ENST00000215115.4	215	455	8	2	0	3.51096
ENST00000215115.4:221-455	ENST00000215115.4	221	455	8	2	0	3.51096
ENST00000215115.4:224-455	ENST00000215115.4	224	455	8	2	0	3.51096
ENST00000215115.4:23-455	ENST00000215115.4	23	455	8	2	0	3.51096
ENST00000215115.4:244-424	ENST00000215115.4	244	424	0	8	2	-3.51096
ENST00000215115.4:265-424	ENST00000215115.4	265	424	0	8	2	-3.51096
ENST00000215115.4:281-455	ENST00000215115.4	281	455	8	2	0	3.51096
ENST00000215115.4:56-455	ENST00000215115.4	56	455	8	2	0	3.51096
ENST00000215115.4:62-455	ENST00000215115.4	62	455	8	2	0	3.51096
ENST00000215115.4:68-455	ENST00000215115.4	68	455	8	2	0	3.51096
ENST00000215115.4:74-455	ENST00000215115.4	74	455	8	2	0	3.51096
ENST00000215570.7:0-60	ENST00000215570.7	0	60	26	4	5	4.77911
ENST00000215570.7:27-60	ENST00000215570.7	27	60	26	3	5	4.88982
ENST00000215570.7:32-80	ENST00000215570.7	32	80	5	26	3	-4.88982
ENST00000215570.7:6-60	ENST00000215570.7	6	60	26	4	5	4.77911
ENST00000215582.7:10-49	ENST00000215582.7	10	49	8	10	7	-0.641546
ENST00000215582.7:24-84	ENST00000215582.7	24	84	7	8	5	-0.765535
ENST00000215631.8:103-136	ENST00000215631.8	103	136	1	17	1	-4.80464
ENST00000215631.8:123-225	ENST00000215631.8	123	225	16	14	24	-2.03953
ENST00000215631.8:138-225	ENST00000215631.8	138	225	16	13	12	0.708537
ENST00000215631.8:25-136	ENST00000215631.8	25	136	1	22	4	-4.89077
ENST00000215631.8:42-225	ENST00000215631.8	42	225	20	14	34	-3.36375
ENST00000215739.12:21-120	ENST00000215739.12	21	120	1	2	2	-0.485427
ENST00000215739.12:27-120	ENST00000215739.12	27	120	1	2	2	-0.485427
ENST00000215739.12:55-115	ENST00000215739.12	55	115	2	2	1	0.485427
ENST00000215739.12:67-115	ENST00000215739.12	67	115	2	2	1	0.485427
ENST00000215739.12:75-120	ENST00000215739.12	75	120	1	2	2	-0.485427
ENST00000215754.7:380-407	ENST00000215754.7	380	407	7	58	2	-6.44294
ENST00000215754.7:383-407	ENST00000215754.7	383	407	5	58	2	-6.53294
ENST00000215754.7:401-407	ENST00000215754.7	401	407	3	56	2	-6.56786
ENST00000215793.12:75-144	ENST00000215793.12	75	144	50	4	5	6.15387
ENST00000215794.7:122-323	ENST00000215794.7	122	323	5	6	13	-2.52356
ENST00000215794.7:125-323	ENST00000215794.7	125	323	5	6	13	-2.52356
ENST00000215794.7:177-351	ENST00000215794.7	177	351	4	17	6	-3.57154
ENST00000215794.7:184-424	ENST00000215794.7	184	424	17	6	5	3.39232
ENST00000215794.7:191-323	ENST00000215794.7	191	323	5	2	12	-3.21968
ENST00000215794.7:200-323	ENST00000215794.7	200	323	5	1	12	-3.5025
ENST00000215794.7:205-424	ENST00000215794.7	205	424	16	6	2	3.80735
ENST00000215794.7:278-323	ENST00000215794.7	278	323	5	1	12	-3.5025
ENST00000215794.7:280-424	ENST00000215794.7	280	424	16	6	2	3.80735
ENST00000215794.7:300-351	ENST00000215794.7	300	351	1	16	1	-4.70044
ENST00000215794.7:304-424	ENST00000215794.7	304	424	16	1	2	4.53671
ENST00000215794.7:308-323	ENST00000215794.7	308	323	0	1	12	-4.42368
ENST00000215794.7:312-351	ENST00000215794.7	312	351	0	16	1	-4.87543
ENST00000215794.7:319-424	ENST00000215794.7	319	424	5	1	1	2.47805
ENST00000215794.7:51-351	ENST00000215794.7	51	351	6	17	6	-3.22417
ENST00000215794.7:59-323	ENST00000215794.7	59	323	5	6	13	-2.52356
ENST00000215794.7:6-351	ENST00000215794.7	6	351	6	17	6	-3.22417
ENST00000215794.7:68-323	ENST00000215794.7	68	323	5	6	13	-2.52356
ENST00000215794.7:81-351	ENST00000215794.7	81	351	6	17	6	-3.22417
ENST00000215829.7:460-559	ENST00000215829.7	460	559	2	26	28	-4.5502
ENST00000215829.7:478-559	ENST00000215829.7	478	559	2	26	27	-4.51441
ENST00000215829.7:502-559	ENST00000215829.7	502	559	1	24	27	-4.60562
ENST00000215829.7:509-524	ENST00000215829.7	509	524	23	27	0	-4.72683
ENST00000216038.5:22-31	ENST00000216038.5	22	31	7	3	1	2.60666
ENST00000216039.9:123-186	ENST00000216039.9	123	186	2	5	0	-2.6845
ENST00000216039.9:131-206	ENST00000216039.9	131	206	1	3	3	-1.09954
ENST00000216039.9:169-286	ENST00000216039.9	169	286	4	8	10	-1.82597
ENST00000216039.9:226-286	ENST00000216039.9	226	286	1	2	6	-2.5025
ENST00000216039.9:249-441	ENST00000216039.9	249	441	9	0	1	3.96347
ENST00000216039.9:282-441	ENST00000216039.9	282	441	3	0	1	2.16993
ENST00000216039.9:31-286	ENST00000216039.9	31	286	7	16	11	-2.19794
ENST00000216039.9:317-458	ENST00000216039.9	317	458	1	3	0	-2.16993
ENST00000216039.9:324-441	ENST00000216039.9	324	441	3	0	1	2.16993
ENST00000216039.9:97-286	ENST00000216039.9	97	286	6	12	11	-1.64981
ENST00000216181.9:102-225	ENST00000216181.9	102	225	3	7	6	-1.39232
ENST00000216181.9:105-225	ENST00000216181.9	105	225	3	7	6	-1.39232
ENST00000216181.9:33-225	ENST00000216181.9	33	225	3	10	6	-2.29123
ENST00000216181.9:42-225	ENST00000216181.9	42	225	3	8	6	-1.6939
ENST00000216237.9:100-136	ENST00000216237.9	100	136	1	9	1	-3.65951
ENST00000216237.9:115-136	ENST00000216237.9	115	136	1	9	1	-3.65951
ENST00000216237.9:17-152	ENST00000216237.9	17	152	9	1	1	3.65951
ENST00000216237.9:2-152	ENST00000216237.9	2	152	9	1	1	3.65951
ENST00000216237.9:47-152	ENST00000216237.9	47	152	9	1	1	3.65951
ENST00000216237.9:82-136	ENST00000216237.9	82	136	1	9	1	-3.65951
ENST00000216268.5:77-152	ENST00000216268.5	77	152	1	2	6	-2.5025
ENST00000216268.5:81-252	ENST00000216268.5	81	252	2	12	3	-3.54916
ENST00000216277.12:102-195	ENST00000216277.12	102	195	13	16	0	-3.99689
ENST00000216277.12:114-195	ENST00000216277.12	114	195	10	16	0	-4.00692
ENST00000216277.12:153-195	ENST00000216277.12	153	195	8	16	0	-4.08746
ENST00000216277.12:39-75	ENST00000216277.12	39	75	2	42	1	-6.20815
ENST00000216455.8:17-59	ENST00000216455.8	17	59	1	6	6	-2.27684
ENST00000216479.7:113-152	ENST00000216479.7	113	152	44	163	25	-7.18667
ENST00000216479.7:119-152	ENST00000216479.7	119	152	44	151	21	-7.07355
ENST00000216479.7:134-152	ENST00000216479.7	134	152	35	110	16	-6.54012
ENST00000216479.7:137-152	ENST00000216479.7	137	152	35	110	4	-6.91421
ENST00000216479.7:21-99	ENST00000216479.7	21	99	4	1	3	1.45943
ENST00000216479.7:45-99	ENST00000216479.7	45	99	4	1	3	1.45943
ENST00000216479.7:49-109	ENST00000216479.7	49	109	10	3	7	2.23266
ENST00000216479.7:89-152	ENST00000216479.7	89	152	44	170	34	-7.12928
ENST00000216774.10:111-186	ENST00000216774.10	111	186	9	15	2	-3.42884
ENST00000216774.10:122-341	ENST00000216774.10	122	341	2	8	2	-2.80735
ENST00000216774.10:24-186	ENST00000216774.10	24	186	9	16	2	-3.57154
ENST00000216774.10:71-341	ENST00000216774.10	71	341	2	9	16	-3.57154
ENST00000216774.10:78-186	ENST00000216774.10	78	186	9	16	2	-3.57154
ENST00000216774.10:81-186	ENST00000216774.10	81	186	9	16	2	-3.57154
ENST00000216774.10:84-186	ENST00000216774.10	84	186	9	16	2	-3.57154
ENST00000216774.10:95-341	ENST00000216774.10	95	341	2	9	15	-3.42884
ENST00000217109.8:133-193	ENST00000217109.8	133	193	6	29	0	-5.36357
ENST00000217109.8:139-193	ENST00000217109.8	139	193	6	29	0	-5.36357
ENST00000217109.8:154-193	ENST00000217109.8	154	193	6	29	0	-5.36357
ENST00000217159.5:0-174	ENST00000217159.5	0	174	4	7	8	-1.24393
ENST00000217159.5:24-174	ENST00000217159.5	24	174	4	7	8	-1.24393
ENST00000217159.5:28-151	ENST00000217159.5	28	151	4	4	1	1.58496
ENST00000217159.5:63-174	ENST00000217159.5	63	174	2	6	4	-1.58496
ENST00000217182.4:139-244	ENST00000217182.4	139	244	4	42	3	-5.94323
ENST00000217182.4:185-284	ENST00000217182.4	185	284	26	29	6	-4.0336
ENST00000217182.4:236-284	ENST00000217182.4	236	284	16	28	6	-3.95977
ENST00000217182.4:263-284	ENST00000217182.4	263	284	0	9	0	-4.24793
ENST00000217244.7:103-316	ENST00000217244.7	103	316	40	3	16	5.20283
ENST00000217244.7:172-316	ENST00000217244.7	172	316	39	3	16	5.14483
ENST00000217244.7:185-248	ENST00000217244.7	185	248	3	16	37	-5.02395
ENST00000217244.7:195-216	ENST00000217244.7	195	216	9	34	1	-5.37188
ENST00000217244.7:202-316	ENST00000217244.7	202	316	12	1	0	4.42368
ENST00000217244.7:40-316	ENST00000217244.7	40	316	40	3	16	5.20283
ENST00000217244.7:67-316	ENST00000217244.7	67	316	40	3	16	5.20283
ENST00000217652.7:149-371	ENST00000217652.7	149	371	3	43	10	-5.64076
ENST00000217652.7:155-371	ENST00000217652.7	155	371	3	43	10	-5.64076
ENST00000217652.7:167-371	ENST00000217652.7	167	371	3	43	10	-5.64076
ENST00000217652.7:212-371	ENST00000217652.7	212	371	3	43	10	-5.64076
ENST00000217652.7:245-371	ENST00000217652.7	245	371	2	43	10	-5.71499
ENST00000217652.7:266-371	ENST00000217652.7	266	371	2	43	10	-5.71499
ENST00000217652.7:324-387	ENST00000217652.7	324	387	49	20	40	3.71462
ENST00000217652.7:353-371	ENST00000217652.7	353	371	2	43	9	-5.76671
ENST00000217893.9:116-278	ENST00000217893.9	116	278	11	52	37	-4.74524
ENST00000217893.9:152-278	ENST00000217893.9	152	278	11	52	37	-4.74524
ENST00000217893.9:155-278	ENST00000217893.9	155	278	11	52	37	-4.74524
ENST00000217893.9:170-278	ENST00000217893.9	170	278	11	52	37	-4.74524
ENST00000217893.9:236-278	ENST00000217893.9	236	278	11	52	37	-4.74524
ENST00000217893.9:249-264	ENST00000217893.9	249	264	29	37	3	-4.83179
ENST00000217893.9:251-278	ENST00000217893.9	251	278	11	52	37	-4.74524
ENST00000217893.9:255-264	ENST00000217893.9	255	264	29	37	3	-4.83179
ENST00000217971.7:6-84	ENST00000217971.7	6	84	0	18	51	-5.88689
ENST00000218056.9:193-421	ENST00000218056.9	193	421	6	18	5	-3.56408
ENST00000218056.9:214-421	ENST00000218056.9	214	421	6	18	4	-3.7318
ENST00000218056.9:23-38	ENST00000218056.9	23	38	4	0	3	2.23704
ENST00000218056.9:235-421	ENST00000218056.9	235	421	5	18	1	-4.37504
ENST00000218056.9:247-421	ENST00000218056.9	247	421	5	18	1	-4.37504
ENST00000218056.9:27-159	ENST00000218056.9	27	159	6	3	4	1.05445
ENST00000218056.9:277-421	ENST00000218056.9	277	421	3	18	0	-4.7851
ENST00000218056.9:295-421	ENST00000218056.9	295	421	3	18	0	-4.7851
ENST00000218056.9:319-421	ENST00000218056.9	319	421	3	18	0	-4.7851
ENST00000218056.9:322-421	ENST00000218056.9	322	421	3	18	0	-4.7851
ENST00000218056.9:328-421	ENST00000218056.9	328	421	3	17	0	-4.6837
ENST00000218056.9:34-421	ENST00000218056.9	34	421	6	22	11	-3.49923
ENST00000218056.9:352-421	ENST00000218056.9	352	421	3	17	0	-4.6837
ENST00000218056.9:4-421	ENST00000218056.9	4	421	9	22	11	-3
ENST00000218089.13:11-266	ENST00000218089.13	11	266	7	9	1	-2.8314
ENST00000218089.13:200-266	ENST00000218089.13	200	266	7	7	0	3
ENST00000218089.13:217-223	ENST00000218089.13	217	223	0	4	0	-3.16993
ENST00000218104.5:17-212	ENST00000218104.5	17	212	6	20	22	-3.39232
ENST00000218104.5:21-297	ENST00000218104.5	21	297	20	28	8	-3.56768
ENST00000218104.5:27-297	ENST00000218104.5	27	297	20	28	8	-3.56768
ENST00000218104.5:30-297	ENST00000218104.5	30	297	20	28	8	-3.56768
ENST00000218104.5:6-297	ENST00000218104.5	6	297	20	28	8	-3.56768
ENST00000218104.5:75-297	ENST00000218104.5	75	297	20	28	8	-3.56768
ENST00000218104.5:89-212	ENST00000218104.5	89	212	6	20	17	-3.10121
ENST00000218340.3:12-123	ENST00000218340.3	12	123	0	4	8	-3.16993
ENST00000218340.3:3-123	ENST00000218340.3	3	123	0	4	8	-3.16993
ENST00000218340.3:30-123	ENST00000218340.3	30	123	0	4	8	-3.16993
ENST00000218340.3:6-123	ENST00000218340.3	6	123	0	4	8	-3.16993
ENST00000218340.3:60-123	ENST00000218340.3	60	123	0	4	8	-3.16993
ENST00000218340.3:72-123	ENST00000218340.3	72	123	0	4	8	-3.16993
ENST00000218340.3:98-128	ENST00000218340.3	98	128	8	0	3	3.30875
ENST00000218388.8:21-108	ENST00000218388.8	21	108	5	5	1	1.96683
ENST00000218388.8:51-108	ENST00000218388.8	51	108	3	3	1	1.09954
ENST00000218388.8:69-108	ENST00000218388.8	69	108	3	3	1	1.09954
ENST00000219271.3:196-649	ENST00000219271.3	196	649	8	4	5	1.3388
ENST00000219271.3:217-649	ENST00000219271.3	217	649	8	4	5	1.3388
ENST00000219271.3:232-649	ENST00000219271.3	232	649	8	4	4	1.58496
ENST00000219271.3:250-649	ENST00000219271.3	250	649	8	4	4	1.58496
ENST00000219271.3:254-464	ENST00000219271.3	254	464	3	4	8	-1.926
ENST00000219271.3:263-464	ENST00000219271.3	263	464	3	4	8	-1.926
ENST00000219320.8:204-405	ENST00000219320.8	204	405	1	4	24	-5.05939
ENST00000219320.8:260-401	ENST00000219320.8	260	401	23	1	4	4.97728
ENST00000219320.8:263-401	ENST00000219320.8	263	401	23	1	4	4.97728
ENST00000219320.8:266-401	ENST00000219320.8	266	401	23	1	4	4.97728
ENST00000219320.8:306-405	ENST00000219320.8	306	405	1	4	24	-5.05939
ENST00000219320.8:336-405	ENST00000219320.8	336	405	1	4	24	-5.05939
ENST00000219320.8:339-405	ENST00000219320.8	339	405	1	4	24	-5.05939
ENST00000219320.8:343-493	ENST00000219320.8	343	493	4	25	3	-4.90388
ENST00000219320.8:349-493	ENST00000219320.8	349	493	4	25	3	-4.90388
ENST00000219320.8:351-405	ENST00000219320.8	351	405	1	4	24	-5.05939
ENST00000219320.8:397-493	ENST00000219320.8	397	493	0	25	3	-5.35504
ENST00000219454.9:170-221	ENST00000219454.9	170	221	6	7	0	-2.92892
ENST00000219454.9:179-221	ENST00000219454.9	179	221	6	7	0	-2.92892
ENST00000219611.6:130-316	ENST00000219611.6	130	316	8	0	1	3.77259
ENST00000219611.6:147-258	ENST00000219611.6	147	258	1	8	0	-3.77259
ENST00000219611.6:166-316	ENST00000219611.6	166	316	8	0	1	3.77259
ENST00000219611.6:168-258	ENST00000219611.6	168	258	1	8	0	-3.77259
ENST00000219611.6:186-258	ENST00000219611.6	186	258	1	8	0	-3.77259
ENST00000219611.6:204-258	ENST00000219611.6	204	258	1	8	0	-3.77259
ENST00000219611.6:212-263	ENST00000219611.6	212	263	0	1	8	-3.77259
ENST00000219611.6:82-316	ENST00000219611.6	82	316	8	0	1	3.77259
ENST00000219611.6:84-258	ENST00000219611.6	84	258	1	8	0	-3.77259
ENST00000219611.6:9-258	ENST00000219611.6	9	258	1	8	0	-3.77259
ENST00000220003.13:118-619	ENST00000220003.13	118	619	50	20	15	4.71667
ENST00000220003.13:135-591	ENST00000220003.13	135	591	14	47	15	-4.84879
ENST00000220003.13:151-619	ENST00000220003.13	151	619	47	19	15	4.55573
ENST00000220003.13:165-591	ENST00000220003.13	165	591	14	46	15	-4.78031
ENST00000220003.13:201-591	ENST00000220003.13	201	591	13	46	15	-4.84583
ENST00000220003.13:258-591	ENST00000220003.13	258	591	13	46	14	-4.90491
ENST00000220003.13:281-683	ENST00000220003.13	281	683	18	14	45	-4.5333
ENST00000220003.13:345-591	ENST00000220003.13	345	591	12	45	11	-5.08871
ENST00000220003.13:366-591	ENST00000220003.13	366	591	9	26	5	-4.29646
ENST00000220003.13:390-591	ENST00000220003.13	390	591	7	13	1	-3.49643
ENST00000220003.13:413-683	ENST00000220003.13	413	683	5	8	10	-1.40718
ENST00000220003.13:479-683	ENST00000220003.13	479	683	4	8	5	-1.3388
ENST00000220003.13:493-619	ENST00000220003.13	493	619	4	4	6	-0.652077
ENST00000220003.13:499-619	ENST00000220003.13	499	619	1	4	6	-2.15528
ENST00000220003.13:503-683	ENST00000220003.13	503	683	4	6	1	-2.15528
ENST00000220003.13:78-591	ENST00000220003.13	78	591	14	50	16	-4.98641
ENST00000220003.13:9-591	ENST00000220003.13	9	591	14	50	16	-4.98641
ENST00000220003.13:93-591	ENST00000220003.13	93	591	14	50	16	-4.98641
ENST00000220562.8:680-866	ENST00000220562.8	680	866	3	4	5	-0.584963
ENST00000220562.8:755-866	ENST00000220562.8	755	866	1	3	5	-1.87447
ENST00000220562.8:776-866	ENST00000220562.8	776	866	1	3	5	-1.87447
ENST00000220562.8:809-866	ENST00000220562.8	809	866	1	3	5	-1.87447
ENST00000220562.8:849-876	ENST00000220562.8	849	876	1	3	1	-1.37851
ENST00000220562.8:855-876	ENST00000220562.8	855	876	1	3	1	-1.37851
ENST00000221265.7:137-299	ENST00000221265.7	137	299	15	5	19	-3.16993
ENST00000221265.7:140-299	ENST00000221265.7	140	299	12	5	19	-3.1964
ENST00000221265.7:166-259	ENST00000221265.7	166	259	13	11	1	3.4489
ENST00000221265.7:20-299	ENST00000221265.7	20	299	15	6	19	-2.93546
ENST00000221265.7:79-160	ENST00000221265.7	79	160	3	3	3	0
ENST00000221265.7:95-299	ENST00000221265.7	95	299	15	6	19	-2.93546
ENST00000221494.9:251-425	ENST00000221494.9	251	425	2	3	1	-1
ENST00000221494.9:317-425	ENST00000221494.9	317	425	2	3	1	-1
ENST00000221494.9:326-425	ENST00000221494.9	326	425	2	3	1	-1
ENST00000221494.9:344-425	ENST00000221494.9	344	425	2	3	1	-1
ENST00000221494.9:380-425	ENST00000221494.9	380	425	2	3	1	-1
ENST00000221494.9:395-425	ENST00000221494.9	395	425	2	2	0	1.58496
ENST00000221494.9:398-425	ENST00000221494.9	398	425	1	2	0	-1.58496
ENST00000221855.7:117-159	ENST00000221855.7	117	159	5	16	4	-3.54102
ENST00000221855.7:123-159	ENST00000221855.7	123	159	5	14	4	-3.15592
ENST00000221855.7:126-159	ENST00000221855.7	126	159	5	14	3	-3.37346
ENST00000221855.7:37-67	ENST00000221855.7	37	67	1	2	1	-0.584963
ENST00000221855.7:42-72	ENST00000221855.7	42	72	1	1	2	-0.584963
ENST00000221855.7:72-159	ENST00000221855.7	72	159	11	49	14	-5.21681
ENST00000221855.7:85-487	ENST00000221855.7	85	487	54	17	14	5.17134
ENST00000221930.5:110-554	ENST00000221930.5	110	554	11	16	25	-2.76717
ENST00000221930.5:191-554	ENST00000221930.5	191	554	6	4	7	-0.866733
ENST00000221930.5:214-286	ENST00000221930.5	214	286	1	1	1	0
ENST00000221930.5:250-286	ENST00000221930.5	250	286	1	1	1	0
ENST00000221930.5:296-554	ENST00000221930.5	296	554	5	2	1	2.08746
ENST00000221930.5:590-737	ENST00000221930.5	590	737	28	3	12	4.54672
ENST00000221930.5:607-667	ENST00000221930.5	607	667	10	23	0	-4.65431
ENST00000221930.5:676-688	ENST00000221930.5	676	688	0	3	3	-2
ENST00000222120.7:156-222	ENST00000222120.7	156	222	6	10	0	-3.39232
ENST00000222120.7:51-222	ENST00000222120.7	51	222	8	10	1	-3.00946
ENST00000222120.7:54-222	ENST00000222120.7	54	222	8	10	1	-3.00946
ENST00000222254.12:118-286	ENST00000222254.12	118	286	19	4	2	4.44095
ENST00000222254.12:129-294	ENST00000222254.12	129	294	2	28	7	-4.99389
ENST00000222254.12:13-286	ENST00000222254.12	13	286	20	4	2	4.55223
ENST00000222254.12:139-286	ENST00000222254.12	139	286	19	3	2	4.56986
ENST00000222254.12:142-286	ENST00000222254.12	142	286	19	3	2	4.56986
ENST00000222254.12:149-344	ENST00000222254.12	149	344	6	3	28	-4.96422
ENST00000222254.12:160-286	ENST00000222254.12	160	286	19	3	1	4.72199
ENST00000222254.12:191-344	ENST00000222254.12	191	344	6	2	28	-5.07325
ENST00000222254.12:201-294	ENST00000222254.12	201	294	1	28	6	-5.18473
ENST00000222254.12:204-294	ENST00000222254.12	204	294	1	28	6	-5.18473
ENST00000222254.12:212-344	ENST00000222254.12	212	344	6	2	25	-4.83059
ENST00000222254.12:220-286	ENST00000222254.12	220	286	16	3	1	4.38543
ENST00000222254.12:229-286	ENST00000222254.12	229	286	16	1	1	4.70044
ENST00000222254.12:233-344	ENST00000222254.12	233	344	4	2	25	-5.01878
ENST00000222254.12:236-344	ENST00000222254.12	236	344	4	2	25	-5.01878
ENST00000222254.12:260-344	ENST00000222254.12	260	344	4	1	16	-4.24793
ENST00000222254.12:270-294	ENST00000222254.12	270	294	0	11	3	-3.89308
ENST00000222254.12:282-294	ENST00000222254.12	282	294	0	9	3	-3.52356
ENST00000222254.12:60-294	ENST00000222254.12	60	294	2	29	7	-5.06949
ENST00000222254.12:90-294	ENST00000222254.12	90	294	2	29	7	-5.06949
ENST00000222345.10:11-146	ENST00000222345.10	11	146	1	5	1	-2.47805
ENST00000222345.10:17-146	ENST00000222345.10	17	146	1	5	1	-2.47805
ENST00000222345.10:26-146	ENST00000222345.10	26	146	1	3	1	-1.37851
ENST00000222345.10:51-180	ENST00000222345.10	51	180	2	4	0	-2.32193
ENST00000222345.10:81-180	ENST00000222345.10	81	180	2	4	0	-2.32193
ENST00000222345.10:85-187	ENST00000222345.10	85	187	4	0	2	2.32193
ENST00000222345.10:96-180	ENST00000222345.10	96	180	2	4	0	-2.32193
ENST00000222553.7:1-214	ENST00000222553.7	1	214	19	2	0	5.00643
ENST00000222553.7:155-236	ENST00000222553.7	155	236	3	1	23	-5.08274
ENST00000222553.7:210-219	ENST00000222553.7	210	219	0	19	0	-5.2854
ENST00000222553.7:43-214	ENST00000222553.7	43	214	19	2	0	5.00643
ENST00000222553.7:89-236	ENST00000222553.7	89	236	5	1	23	-4.87842
ENST00000222553.7:97-214	ENST00000222553.7	97	214	19	0	0	5.2854
ENST00000222747.7:150-576	ENST00000222747.7	150	576	4	7	2	-1.97199
ENST00000222747.7:216-576	ENST00000222747.7	216	576	4	7	2	-1.97199
ENST00000222747.7:226-475	ENST00000222747.7	226	475	5	2	4	1.18442
ENST00000222747.7:232-475	ENST00000222747.7	232	475	5	2	4	1.18442
ENST00000222747.7:238-475	ENST00000222747.7	238	475	5	2	4	1.18442
ENST00000222747.7:277-475	ENST00000222747.7	277	475	5	2	4	1.18442
ENST00000222747.7:295-475	ENST00000222747.7	295	475	5	2	4	1.18442
ENST00000222747.7:328-475	ENST00000222747.7	328	475	3	2	4	-0.736966
ENST00000222747.7:331-475	ENST00000222747.7	331	475	3	2	4	-0.736966
ENST00000222747.7:378-576	ENST00000222747.7	378	576	4	5	1	-1.848
ENST00000222803.9:118-151	ENST00000222803.9	118	151	0	7	0	-3.90689
ENST00000222803.9:13-79	ENST00000222803.9	13	79	2	2	15	-4.23185
ENST00000222803.9:25-79	ENST00000222803.9	25	79	2	2	15	-4.23185
ENST00000222803.9:28-79	ENST00000222803.9	28	79	2	1	15	-4.41504
ENST00000222803.9:35-53	ENST00000222803.9	35	53	1	10	2	-3.61244
ENST00000222803.9:37-79	ENST00000222803.9	37	79	2	1	15	-4.41504
ENST00000222803.9:42-69	ENST00000222803.9	42	69	15	2	1	4.41504
ENST00000222803.9:6-69	ENST00000222803.9	6	69	15	2	2	4.23185
ENST00000222803.9:97-151	ENST00000222803.9	97	151	2	7	0	-3.27302
ENST00000222969.9:110-215	ENST00000222969.9	110	215	23	30	1	-4.72489
ENST00000222969.9:114-246	ENST00000222969.9	114	246	29	1	23	4.67828
ENST00000222969.9:137-215	ENST00000222969.9	137	215	23	27	1	-4.58849
ENST00000222969.9:144-246	ENST00000222969.9	144	246	25	1	20	4.45372
ENST00000222969.9:155-215	ENST00000222969.9	155	215	20	21	1	-4.25873
ENST00000222969.9:162-246	ENST00000222969.9	162	246	15	0	0	4.9542
ENST00000222969.9:31-166	ENST00000222969.9	31	166	4	24	33	-4.50285
ENST00000222969.9:42-114	ENST00000222969.9	42	114	16	3	1	4.38543
ENST00000222969.9:57-114	ENST00000222969.9	57	114	12	2	1	3.98185
ENST00000222969.9:63-114	ENST00000222969.9	63	114	10	2	1	3.61244
ENST00000222969.9:67-166	ENST00000222969.9	67	166	2	24	22	-4.2854
ENST00000222969.9:83-215	ENST00000222969.9	83	215	24	35	2	-4.84652
ENST00000222969.9:88-166	ENST00000222969.9	88	166	2	24	22	-4.2854
ENST00000222969.9:98-215	ENST00000222969.9	98	215	23	35	2	-4.853
ENST00000223061.5:103-253	ENST00000223061.5	103	253	10	24	4	-4.14009
ENST00000223061.5:109-253	ENST00000223061.5	109	253	10	24	4	-4.14009
ENST00000223061.5:151-253	ENST00000223061.5	151	253	10	24	4	-4.14009
ENST00000223061.5:169-253	ENST00000223061.5	169	253	10	24	4	-4.14009
ENST00000223061.5:178-253	ENST00000223061.5	178	253	10	24	4	-4.14009
ENST00000223061.5:184-253	ENST00000223061.5	184	253	10	24	4	-4.14009
ENST00000223061.5:193-253	ENST00000223061.5	193	253	10	23	4	-4.02656
ENST00000223061.5:196-253	ENST00000223061.5	196	253	10	23	4	-4.02656
ENST00000223061.5:199-253	ENST00000223061.5	199	253	10	22	4	-3.90689
ENST00000223061.5:211-253	ENST00000223061.5	211	253	10	22	3	-4.07284
ENST00000223061.5:214-253	ENST00000223061.5	214	253	10	20	3	-3.83519
ENST00000223061.5:217-253	ENST00000223061.5	217	253	9	18	3	-3.63227
ENST00000223127.7:240-354	ENST00000223127.7	240	354	3	1	2	1
ENST00000223136.4:1-49	ENST00000223136.4	1	49	23	816	30	-10.4875
ENST00000223136.4:28-49	ENST00000223136.4	28	49	23	816	30	-10.4875
ENST00000223136.4:35-56	ENST00000223136.4	35	56	816	30	23	10.4875
ENST00000223136.4:37-49	ENST00000223136.4	37	49	23	813	29	-10.485
ENST00000223864.6:42-141	ENST00000223864.6	42	141	3	2	1	1
ENST00000223864.6:50-167	ENST00000223864.6	50	167	1	3	2	-1
ENST00000223864.6:65-167	ENST00000223864.6	65	167	1	3	2	-1
ENST00000223864.6:90-141	ENST00000223864.6	90	141	3	2	1	1
ENST00000223864.6:92-167	ENST00000223864.6	92	167	1	3	0	-2.16993
ENST00000224140.5:52-106	ENST00000224140.5	52	106	3	0	9	-3.52356
ENST00000224140.5:71-134	ENST00000224140.5	71	134	0	14	5	-4.0785
ENST00000224140.5:79-106	ENST00000224140.5	79	106	3	0	4	-2.23704
ENST00000224140.5:92-134	ENST00000224140.5	92	134	0	9	5	-3.28011
ENST00000225171.6:11-77	ENST00000225171.6	11	77	0	32	53	-5.68039
ENST00000225171.6:15-66	ENST00000225171.6	15	66	31	53	0	-5.6905
ENST00000225171.6:17-77	ENST00000225171.6	17	77	0	32	53	-5.68039
ENST00000225171.6:45-66	ENST00000225171.6	45	66	31	53	0	-5.6905
ENST00000225171.6:47-77	ENST00000225171.6	47	77	0	32	40	-5.26053
ENST00000225171.6:54-66	ENST00000225171.6	54	66	30	40	0	-5.25334
ENST00000225603.8:10-133	ENST00000225603.8	10	133	7	4	1	2.45943
ENST00000225603.8:100-133	ENST00000225603.8	100	133	7	4	1	2.45943
ENST00000225603.8:118-133	ENST00000225603.8	118	133	7	4	1	2.45943
ENST00000225603.8:28-133	ENST00000225603.8	28	133	7	4	1	2.45943
ENST00000225603.8:34-133	ENST00000225603.8	34	133	7	4	1	2.45943
ENST00000225603.8:64-133	ENST00000225603.8	64	133	7	4	1	2.45943
ENST00000225603.8:7-133	ENST00000225603.8	7	133	7	4	1	2.45943
ENST00000225603.8:85-133	ENST00000225603.8	85	133	7	4	1	2.45943
ENST00000225655.5:127-319	ENST00000225655.5	127	319	25	2	6	4.83059
ENST00000225655.5:136-319	ENST00000225655.5	136	319	25	2	6	4.83059
ENST00000225655.5:143-335	ENST00000225655.5	143	335	2	5	25	-4.92184
ENST00000225655.5:156-435	ENST00000225655.5	156	435	5	31	3	-5.26823
ENST00000225655.5:180-435	ENST00000225655.5	180	435	5	30	2	-5.29735
ENST00000225655.5:192-435	ENST00000225655.5	192	435	5	27	2	-5.08246
ENST00000225655.5:210-435	ENST00000225655.5	210	435	5	27	2	-5.08246
ENST00000225655.5:224-335	ENST00000225655.5	224	335	1	5	12	-3.5025
ENST00000225655.5:231-435	ENST00000225655.5	231	435	5	18	2	-4.19849
ENST00000225655.5:279-435	ENST00000225655.5	279	435	3	13	1	-3.96239
ENST00000225655.5:284-335	ENST00000225655.5	284	335	0	3	7	-3.07039
ENST00000225655.5:301-319	ENST00000225655.5	301	319	6	0	1	3.30117
ENST00000225655.5:71-134	ENST00000225655.5	71	134	2	1	4	-1.58496
ENST00000225665.11:98-230	ENST00000225665.11	98	230	1	10	0	-4.13303
ENST00000225726.9:142-220	ENST00000225726.9	142	220	0	6	2	-3
ENST00000225726.9:181-220	ENST00000225726.9	181	220	0	6	2	-3
ENST00000225726.9:185-203	ENST00000225726.9	185	203	2	2	0	1.58496
ENST00000226225.6:114-159	ENST00000226225.6	114	159	2	6	0	-3
ENST00000226225.6:126-159	ENST00000226225.6	126	159	2	6	0	-3
ENST00000226225.6:62-167	ENST00000226225.6	62	167	0	3	6	-2.80735
ENST00000226225.6:68-167	ENST00000226225.6	68	167	0	3	6	-2.80735
ENST00000226225.6:71-167	ENST00000226225.6	71	167	0	3	6	-2.80735
ENST00000226225.6:86-167	ENST00000226225.6	86	167	0	3	6	-2.80735
ENST00000226522.8:4-55	ENST00000226522.8	4	55	1	6	11	-3.22239
ENST00000226796.6:40-61	ENST00000226796.6	40	61	4	1	2	1.58496
ENST00000226796.6:64-100	ENST00000226796.6	64	100	14	4	3	3.5325
ENST00000226796.6:69-171	ENST00000226796.6	69	171	4	12	9	-2.29866
ENST00000226796.6:78-171	ENST00000226796.6	78	171	3	12	9	-2.64386
ENST00000226796.6:81-171	ENST00000226796.6	81	171	3	12	9	-2.64386
ENST00000227524.8:25-58	ENST00000227524.8	25	58	23	3	0	5.21245
ENST00000227525.7:292-313	ENST00000227525.7	292	313	9	7	3	1.98089
ENST00000227525.7:298-313	ENST00000227525.7	298	313	9	7	1	2.8314
ENST00000227525.7:327-372	ENST00000227525.7	327	372	3	1	6	-2.26303
ENST00000227525.7:340-379	ENST00000227525.7	340	379	2	6	4	-1.58496
ENST00000227525.7:343-379	ENST00000227525.7	343	379	2	6	4	-1.58496
ENST00000227525.7:381-390	ENST00000227525.7	381	390	12	72	0	-6.74531
ENST00000227758.6:119-227	ENST00000227758.6	119	227	2	7	6	-1.926
ENST00000227758.6:137-227	ENST00000227758.6	137	227	2	7	5	-1.89308
ENST00000227758.6:152-227	ENST00000227758.6	152	227	2	7	5	-1.89308
ENST00000227758.6:176-227	ENST00000227758.6	176	227	2	6	5	-1.58496
ENST00000227758.6:204-237	ENST00000227758.6	204	237	6	5	2	1.58496
ENST00000227758.6:86-227	ENST00000227758.6	86	227	2	8	6	-2.16993
ENST00000228437.9:103-379	ENST00000228437.9	103	379	4	9	21	-3.85505
ENST00000228437.9:120-156	ENST00000228437.9	120	156	7	3	5	1.37851
ENST00000228437.9:152-365	ENST00000228437.9	152	365	8	21	1	-4.43296
ENST00000228437.9:16-379	ENST00000228437.9	16	379	4	9	21	-3.85505
ENST00000228437.9:167-365	ENST00000228437.9	167	365	2	14	1	-4.28322
ENST00000228437.9:197-365	ENST00000228437.9	197	365	2	14	1	-4.28322
ENST00000228437.9:205-379	ENST00000228437.9	205	379	1	2	14	-4.28322
ENST00000228437.9:73-379	ENST00000228437.9	73	379	4	9	21	-3.85505
ENST00000228438.2:796-922	ENST00000228438.2	796	922	37	38	79	-4.54699
ENST00000228438.2:802-922	ENST00000228438.2	802	922	35	32	79	-4.8803
ENST00000228438.2:804-813	ENST00000228438.2	804	813	7	24	9	-3.80219
ENST00000228438.2:807-813	ENST00000228438.2	807	813	3	20	1	-4.82018
ENST00000228438.2:859-922	ENST00000228438.2	859	922	10	17	71	-6.11321
ENST00000228438.2:872-899	ENST00000228438.2	872	899	10	69	5	-6.5157
ENST00000228438.2:881-899	ENST00000228438.2	881	899	10	68	5	-6.48624
ENST00000228438.2:892-922	ENST00000228438.2	892	922	3	9	37	-5.369
ENST00000228506.7:284-359	ENST00000228506.7	284	359	7	26	2	-4.83217
ENST00000228506.7:311-359	ENST00000228506.7	311	359	5	26	2	-5.00409
ENST00000228740.6:107-113	ENST00000228740.6	107	113	0	51	3	-6.52356
ENST00000228740.6:82-130	ENST00000228740.6	82	130	5	4	57	-6.40166
ENST00000228740.6:88-130	ENST00000228740.6	88	130	5	4	57	-6.40166
ENST00000228740.6:95-113	ENST00000228740.6	95	113	1	51	4	-6.41363
ENST00000228872.8:311-644	ENST00000228872.8	311	644	43	25	21	3.35874
ENST00000228872.8:330-678	ENST00000228872.8	330	678	25	21	43	-3.35874
ENST00000228872.8:340-502	ENST00000228872.8	340	502	18	42	9	-4.71723
ENST00000228872.8:346-502	ENST00000228872.8	346	502	18	42	9	-4.71723
ENST00000228872.8:352-502	ENST00000228872.8	352	502	16	40	9	-4.66676
ENST00000228872.8:363-678	ENST00000228872.8	363	678	24	17	35	-2.90689
ENST00000228872.8:376-502	ENST00000228872.8	376	502	13	32	8	-4.25934
ENST00000228872.8:387-678	ENST00000228872.8	387	678	24	16	33	-2.79602
ENST00000228872.8:410-644	ENST00000228872.8	410	644	33	24	16	2.79602
ENST00000228872.8:430-502	ENST00000228872.8	430	502	12	30	7	-4.24172
ENST00000228872.8:437-644	ENST00000228872.8	437	644	31	23	15	2.71484
ENST00000228872.8:453-678	ENST00000228872.8	453	678	22	15	31	-2.73909
ENST00000228872.8:457-502	ENST00000228872.8	457	502	10	30	6	-4.49603
ENST00000228872.8:498-678	ENST00000228872.8	498	678	22	12	3	3.96797
ENST00000228872.8:545-644	ENST00000228872.8	545	644	1	16	3	-4.38543
ENST00000228872.8:569-644	ENST00000228872.8	569	644	1	16	3	-4.38543
ENST00000229030.4:123-444	ENST00000229030.4	123	444	5	7	6	-0.415037
ENST00000229030.4:201-444	ENST00000229030.4	201	444	3	4	5	-0.584963
ENST00000229030.4:261-444	ENST00000229030.4	261	444	3	3	5	-0.788496
ENST00000229390.7:31-88	ENST00000229390.7	31	88	5	128	12	-7.63282
ENST00000229390.7:73-88	ENST00000229390.7	73	88	5	128	12	-7.63282
ENST00000229390.7:78-132	ENST00000229390.7	78	132	5	5	68	-6.68326
ENST00000229390.7:84-132	ENST00000229390.7	84	132	5	5	0	2.58496
ENST00000229563.5:100-262	ENST00000229563.5	100	262	7	5	4	0.906891
ENST00000229563.5:123-243	ENST00000229563.5	123	243	3	4	4	-0.241008
ENST00000229563.5:172-262	ENST00000229563.5	172	262	5	5	1	1.96683
ENST00000229563.5:189-243	ENST00000229563.5	189	243	0	2	3	-1.926
ENST00000229563.5:227-284	ENST00000229563.5	227	284	8	30	18	-3.80735
ENST00000229563.5:42-243	ENST00000229563.5	42	243	4	4	4	0
ENST00000229563.5:63-243	ENST00000229563.5	63	243	3	4	4	-0.241008
ENST00000229633.6:26-155	ENST00000229633.6	26	155	4	10	10	-2
ENST00000229633.6:7-112	ENST00000229633.6	7	112	8	2	0	3.51096
ENST00000229794.8:101-107	ENST00000229794.8	101	107	0	8	1	-3.77259
ENST00000229794.8:14-107	ENST00000229794.8	14	107	0	9	1	-3.96347
ENST00000229794.8:17-107	ENST00000229794.8	17	107	0	9	1	-3.96347
ENST00000229794.8:63-147	ENST00000229794.8	63	147	11	1	0	4.2854
ENST00000229794.8:68-107	ENST00000229794.8	68	107	0	8	1	-3.77259
ENST00000229794.8:77-107	ENST00000229794.8	77	107	0	8	1	-3.77259
ENST00000230048.4:7-124	ENST00000230048.4	7	124	2	1	1	0.584963
ENST00000230056.7:104-179	ENST00000230056.7	104	179	6	12	1	-3.40312
ENST00000230056.7:140-179	ENST00000230056.7	140	179	6	12	1	-3.40312
ENST00000230056.7:158-179	ENST00000230056.7	158	179	6	12	1	-3.40312
ENST00000230056.7:53-179	ENST00000230056.7	53	179	6	12	1	-3.40312
ENST00000230056.7:83-179	ENST00000230056.7	83	179	6	12	1	-3.40312
ENST00000230122.3:16-163	ENST00000230122.3	16	163	1	4	4	-1.58496
ENST00000230122.3:22-163	ENST00000230122.3	22	163	1	4	4	-1.58496
ENST00000230122.3:28-163	ENST00000230122.3	28	163	1	4	4	-1.58496
ENST00000230449.8:73-106	ENST00000230449.8	73	106	3	1	4	-1.45943
ENST00000230640.9:12-177	ENST00000230640.9	12	177	5	1	2	2.08746
ENST00000230640.9:134-224	ENST00000230640.9	134	224	1	13	3	-3.96239
ENST00000230640.9:170-224	ENST00000230640.9	170	224	1	12	3	-3.79442
ENST00000230640.9:24-177	ENST00000230640.9	24	177	5	1	2	2.08746
ENST00000231368.9:73-352	ENST00000231368.9	73	352	3	5	3	-0.788496
ENST00000232424.3:18-132	ENST00000232424.3	18	132	2	9	0	-3.72048
ENST00000232905.3:17-131	ENST00000232905.3	17	131	8	0	0	4.08746
ENST00000232905.3:191-203	ENST00000232905.3	191	203	1	10	0	-4.13303
ENST00000233072.9:20-125	ENST00000233072.9	20	125	5	16	2	-3.92352
ENST00000233072.9:26-125	ENST00000233072.9	26	125	5	16	2	-3.92352
ENST00000233072.9:47-125	ENST00000233072.9	47	125	5	16	1	-4.12553
ENST00000233072.9:71-125	ENST00000233072.9	71	125	2	7	1	-2.848
ENST00000233072.9:90-129	ENST00000233072.9	90	129	5	1	2	2.08746
ENST00000233072.9:94-154	ENST00000233072.9	94	154	4	6	6	-0.584963
ENST00000233114.12:10-193	ENST00000233114.12	10	193	2	5	1	-2.08746
ENST00000233114.12:104-383	ENST00000233114.12	104	383	4	0	1	2.63227
ENST00000233114.12:13-193	ENST00000233114.12	13	193	2	5	1	-2.08746
ENST00000233114.12:26-383	ENST00000233114.12	26	383	6	1	3	2.26303
ENST00000233114.12:4-193	ENST00000233114.12	4	193	2	5	1	-2.08746
ENST00000233114.12:53-383	ENST00000233114.12	53	383	6	1	3	2.26303
ENST00000233143.5:36-105	ENST00000233143.5	36	105	325	512	315	-6.02525
ENST00000233143.5:39-105	ENST00000233143.5	39	105	325	512	315	-6.02525
ENST00000233143.5:81-105	ENST00000233143.5	81	105	143	453	189	-7.74753
ENST00000233143.5:87-105	ENST00000233143.5	87	105	137	439	176	-7.75679
ENST00000233143.5:96-105	ENST00000233143.5	96	105	100	348	43	-8.33244
ENST00000233154.8:166-343	ENST00000233154.8	166	343	4	4	0	2.32193
ENST00000233154.8:208-343	ENST00000233154.8	208	343	4	4	0	2.32193
ENST00000233154.8:234-285	ENST00000233154.8	234	285	0	3	1	-2.16993
ENST00000233154.8:247-343	ENST00000233154.8	247	343	4	4	0	2.32193
ENST00000233154.8:249-285	ENST00000233154.8	249	285	0	3	1	-2.16993
ENST00000233154.8:256-343	ENST00000233154.8	256	343	3	4	0	-2.23704
ENST00000233154.8:289-343	ENST00000233154.8	289	343	1	3	0	-2.16993
ENST00000233154.8:292-343	ENST00000233154.8	292	343	1	3	0	-2.16993
ENST00000233154.8:304-343	ENST00000233154.8	304	343	1	3	0	-2.16993
ENST00000233154.8:310-343	ENST00000233154.8	310	343	1	2	0	-1.58496
ENST00000233154.8:318-357	ENST00000233154.8	318	357	0	2	2	-1.58496
ENST00000233154.8:61-343	ENST00000233154.8	61	343	4	4	0	2.32193
ENST00000233468.4:115-136	ENST00000233468.4	115	136	26	94	2	-6.82018
ENST00000233468.4:118-136	ENST00000233468.4	118	136	26	87	2	-6.66094
ENST00000233468.4:121-136	ENST00000233468.4	121	136	26	83	2	-6.56327
ENST00000233468.4:140-146	ENST00000233468.4	140	146	5	10	0	-3.45943
ENST00000233468.4:184-196	ENST00000233468.4	184	196	26	4	8	4.50362
ENST00000233468.4:52-136	ENST00000233468.4	52	136	34	94	6	-6.51582
ENST00000233557.7:767-818	ENST00000233557.7	767	818	7	37	3	-5.49458
ENST00000233557.7:773-818	ENST00000233557.7	773	818	7	37	3	-5.49458
ENST00000233557.7:785-818	ENST00000233557.7	785	818	7	37	3	-5.49458
ENST00000233557.7:806-818	ENST00000233557.7	806	818	7	37	3	-5.49458
ENST00000233575.6:117-147	ENST00000233575.6	117	147	22	124	4	-7.39678
ENST00000233575.6:124-217	ENST00000233575.6	124	217	17	3	7	3.65025
ENST00000233575.6:130-217	ENST00000233575.6	130	217	10	3	7	2.23266
ENST00000233575.6:21-147	ENST00000233575.6	21	147	24	124	10	-7.20735
ENST00000233575.6:47-128	ENST00000233575.6	47	128	7	17	114	-7.25616
ENST00000233575.6:59-128	ENST00000233575.6	59	128	7	16	114	-7.27857
ENST00000233575.6:75-147	ENST00000233575.6	75	147	23	124	10	-7.22716
ENST00000233615.6:102-156	ENST00000233615.6	102	156	2	28	1	-5.53465
ENST00000233615.6:113-266	ENST00000233615.6	113	266	1	7	30	-5.24793
ENST00000233615.6:116-266	ENST00000233615.6	116	266	1	7	30	-5.24793
ENST00000233615.6:132-156	ENST00000233615.6	132	156	2	28	1	-5.53465
ENST00000233615.6:84-156	ENST00000233615.6	84	156	2	28	1	-5.53465
ENST00000234111.8:162-450	ENST00000234111.8	162	450	250	30	15	8.46366
ENST00000234111.8:175-283	ENST00000234111.8	175	283	3	0	6	-2.80735
ENST00000234111.8:221-383	ENST00000234111.8	221	383	12	246	28	-8.48992
ENST00000234111.8:279-450	ENST00000234111.8	279	450	242	28	15	8.42242
ENST00000234111.8:282-450	ENST00000234111.8	282	450	242	26	15	8.44448
ENST00000234111.8:311-383	ENST00000234111.8	311	383	12	242	26	-8.48082
ENST00000234111.8:317-383	ENST00000234111.8	317	383	12	237	25	-8.4529
ENST00000234111.8:338-383	ENST00000234111.8	338	383	12	233	25	-8.42104
ENST00000234111.8:350-383	ENST00000234111.8	350	383	12	227	25	-8.37197
ENST00000234111.8:356-383	ENST00000234111.8	356	383	4	31	4	-5.26246
ENST00000234111.8:361-496	ENST00000234111.8	361	496	4	7	31	-5.01282
ENST00000234111.8:370-496	ENST00000234111.8	370	496	4	7	18	-3.61369
ENST00000234179.6:105-243	ENST00000234179.6	105	243	3	20	0	-4.97029
ENST00000234179.6:131-224	ENST00000234179.6	131	224	0	2	10	-3.90689
ENST00000234179.6:159-243	ENST00000234179.6	159	243	3	19	0	-4.88042
ENST00000234179.6:186-243	ENST00000234179.6	186	243	3	19	0	-4.88042
ENST00000234179.6:195-243	ENST00000234179.6	195	243	3	19	0	-4.88042
ENST00000234296.6:0-189	ENST00000234296.6	0	189	18	37	10	-4.22911
ENST00000234296.6:153-189	ENST00000234296.6	153	189	7	35	1	-5.55316
ENST00000234296.6:156-189	ENST00000234296.6	156	189	7	35	1	-5.55316
ENST00000234296.6:177-189	ENST00000234296.6	177	189	1	21	0	-5.29546
ENST00000234296.6:39-189	ENST00000234296.6	39	189	16	37	10	-4.3322
ENST00000234296.6:57-189	ENST00000234296.6	57	189	16	37	10	-4.3322
ENST00000234296.6:7-157	ENST00000234296.6	7	157	2	9	11	-2.82597
ENST00000234296.6:75-189	ENST00000234296.6	75	189	16	37	10	-4.3322
ENST00000234310.7:10-190	ENST00000234310.7	10	190	8	24	13	-3.31228
ENST00000234310.7:127-190	ENST00000234310.7	127	190	5	7	3	-1.37851
ENST00000234310.7:136-190	ENST00000234310.7	136	190	5	4	3	0.584963
ENST00000234310.7:149-350	ENST00000234310.7	149	350	18	5	7	3.43296
ENST00000234310.7:173-350	ENST00000234310.7	173	350	17	5	3	3.88362
ENST00000234310.7:206-350	ENST00000234310.7	206	350	13	3	2	3.73697
ENST00000234310.7:35-350	ENST00000234310.7	35	350	38	16	10	4.41785
ENST00000234310.7:4-190	ENST00000234310.7	4	190	8	24	13	-3.31228
ENST00000234310.7:46-190	ENST00000234310.7	46	190	8	22	8	-3.50027
ENST00000234310.7:69-177	ENST00000234310.7	69	177	8	8	6	0.447459
ENST00000234453.9:100-244	ENST00000234453.9	100	244	0	5	5	-2.58496
ENST00000234453.9:19-244	ENST00000234453.9	19	244	1	5	5	-1.96683
ENST00000234453.9:216-399	ENST00000234453.9	216	399	2	3	1	-1
ENST00000234453.9:219-399	ENST00000234453.9	219	399	2	3	1	-1
ENST00000234453.9:228-399	ENST00000234453.9	228	399	1	3	1	-1.37851
ENST00000234453.9:7-244	ENST00000234453.9	7	244	1	5	5	-1.96683
ENST00000234590.8:9-90	ENST00000234590.8	9	90	336	28	94	8.43257
ENST00000234590.8:93-111	ENST00000234590.8	93	111	58	428	416	-8.20468
ENST00000235090.9:12-180	ENST00000235090.9	12	180	9	1	3	3.16993
ENST00000235090.9:27-180	ENST00000235090.9	27	180	9	1	3	3.16993
ENST00000235090.9:9-180	ENST00000235090.9	9	180	9	1	3	3.16993
ENST00000235332.5:33-147	ENST00000235332.5	33	147	0	5	4	-2.5025
ENST00000235332.5:57-147	ENST00000235332.5	57	147	0	5	4	-2.5025
ENST00000236051.2:113-119	ENST00000236051.2	113	119	2	42	2	-6.14089
ENST00000236051.2:86-119	ENST00000236051.2	86	119	4	86	14	-6.86371
ENST00000236980.10:258-297	ENST00000236980.10	258	297	0	4	3	-2.23704
ENST00000236980.10:288-297	ENST00000236980.10	288	297	0	4	3	-2.23704
ENST00000237455.4:115-265	ENST00000237455.4	115	265	4	1	1	2
ENST00000237455.4:126-456	ENST00000237455.4	126	456	1	6	1	-2.85798
ENST00000237455.4:153-456	ENST00000237455.4	153	456	1	3	0	-2.16993
ENST00000237455.4:180-456	ENST00000237455.4	180	456	1	2	0	-1.58496
ENST00000237455.4:224-734	ENST00000237455.4	224	734	0	3	3	-2
ENST00000237455.4:31-265	ENST00000237455.4	31	265	4	2	1	1.58496
ENST00000237455.4:311-734	ENST00000237455.4	311	734	0	3	2	-1.926
ENST00000237455.4:61-265	ENST00000237455.4	61	265	4	1	1	2
ENST00000237455.4:70-265	ENST00000237455.4	70	265	4	1	1	2
ENST00000237455.4:73-265	ENST00000237455.4	73	265	4	1	1	2
ENST00000237455.4:79-265	ENST00000237455.4	79	265	4	1	1	2
ENST00000237500.9:104-335	ENST00000237500.9	104	335	9	15	37	-4.48395
ENST00000237500.9:155-335	ENST00000237500.9	155	335	9	15	37	-4.48395
ENST00000237500.9:176-335	ENST00000237500.9	176	335	9	15	37	-4.48395
ENST00000237500.9:188-335	ENST00000237500.9	188	335	9	15	37	-4.48395
ENST00000237500.9:200-335	ENST00000237500.9	200	335	9	15	37	-4.48395
ENST00000237500.9:233-335	ENST00000237500.9	233	335	9	15	37	-4.48395
ENST00000237500.9:248-335	ENST00000237500.9	248	335	9	15	37	-4.48395
ENST00000237500.9:266-335	ENST00000237500.9	266	335	9	15	37	-4.48395
ENST00000237500.9:65-335	ENST00000237500.9	65	335	9	15	37	-4.48395
ENST00000237536.8:208-325	ENST00000237536.8	208	325	4	8	6	-1.22239
ENST00000237536.8:307-325	ENST00000237536.8	307	325	1	5	1	-2.47805
ENST00000237536.8:40-325	ENST00000237536.8	40	325	4	8	6	-1.22239
ENST00000237654.8:221-296	ENST00000237654.8	221	296	15	7	0	4.03242
ENST00000237654.8:286-304	ENST00000237654.8	286	304	0	26	4	-5.32912
ENST00000237654.8:44-296	ENST00000237654.8	44	296	46	8	7	5.63294
ENST00000237654.8:58-304	ENST00000237654.8	58	304	7	64	11	-6.23023
ENST00000237853.8:144-309	ENST00000237853.8	144	309	4	2	3	0.736966
ENST00000237853.8:225-309	ENST00000237853.8	225	309	4	2	2	1
ENST00000238112.7:106-154	ENST00000238112.7	106	154	9	18	0	-4.24793
ENST00000238112.7:133-154	ENST00000238112.7	133	154	8	10	0	-3.36923
ENST00000238651.9:101-131	ENST00000238651.9	101	131	0	3	3	-2
ENST00000238651.9:74-131	ENST00000238651.9	74	131	0	3	3	-2
ENST00000238651.9:89-131	ENST00000238651.9	89	131	0	3	3	-2
ENST00000238789.9:24-276	ENST00000238789.9	24	276	0	2	4	-2.32193
ENST00000238831.8:3-72	ENST00000238831.8	3	72	3	32	2	-5.5874
ENST00000238831.8:39-72	ENST00000238831.8	39	72	2	27	2	-5.36886
ENST00000238831.8:60-72	ENST00000238831.8	60	72	0	7	1	-3.55459
ENST00000238831.8:63-72	ENST00000238831.8	63	72	0	4	1	-2.63227
ENST00000238831.8:9-72	ENST00000238831.8	9	72	3	32	2	-5.5874
ENST00000238856.8:0-144	ENST00000238856.8	0	144	1	4	2	-1.58496
ENST00000238856.8:24-144	ENST00000238856.8	24	144	1	4	2	-1.58496
ENST00000238856.8:28-232	ENST00000238856.8	28	232	7	5	1	2.40808
ENST00000238856.8:31-232	ENST00000238856.8	31	232	7	5	1	2.40808
ENST00000238892.3:67-112	ENST00000238892.3	67	112	11	2	1	3.80735
ENST00000238892.3:70-112	ENST00000238892.3	70	112	11	2	1	3.80735
ENST00000238892.3:73-112	ENST00000238892.3	73	112	11	2	1	3.80735
ENST00000239223.3:16-91	ENST00000239223.3	16	91	7	13	2	-3.21299
ENST00000239690.8:205-349	ENST00000239690.8	205	349	5	16	6	-3.20511
ENST00000239690.8:265-349	ENST00000239690.8	265	349	5	15	6	-3
ENST00000239690.8:277-349	ENST00000239690.8	277	349	5	15	5	-3.16993
ENST00000239690.8:286-349	ENST00000239690.8	286	349	2	9	4	-2.63227
ENST00000239690.8:303-318	ENST00000239690.8	303	318	4	1	4	1.58496
ENST00000239906.9:100-319	ENST00000239906.9	100	319	5	16	21	-3.4021
ENST00000239906.9:122-356	ENST00000239906.9	122	356	20	82	12	-6.29026
ENST00000239906.9:131-356	ENST00000239906.9	131	356	20	82	12	-6.29026
ENST00000239906.9:142-319	ENST00000239906.9	142	319	4	16	21	-3.60534
ENST00000239906.9:155-356	ENST00000239906.9	155	356	20	82	12	-6.29026
ENST00000239906.9:214-319	ENST00000239906.9	214	319	4	16	21	-3.60534
ENST00000239906.9:238-319	ENST00000239906.9	238	319	4	15	21	-3.60288
ENST00000239906.9:255-291	ENST00000239906.9	255	291	17	2	11	3.63227
ENST00000239906.9:262-319	ENST00000239906.9	262	319	4	15	21	-3.60288
ENST00000239906.9:287-356	ENST00000239906.9	287	356	14	79	10	-6.46594
ENST00000239906.9:320-356	ENST00000239906.9	320	356	4	61	8	-6.39584
ENST00000239906.9:323-356	ENST00000239906.9	323	356	4	60	8	-6.3634
ENST00000239906.9:326-356	ENST00000239906.9	326	356	4	60	8	-6.3634
ENST00000239906.9:341-356	ENST00000239906.9	341	356	2	37	7	-5.5771
ENST00000239906.9:73-319	ENST00000239906.9	73	319	5	16	21	-3.4021
ENST00000239906.9:89-356	ENST00000239906.9	89	356	20	82	13	-6.25271
ENST00000240100.6:155-305	ENST00000240100.6	155	305	6	54	173	-7.58015
ENST00000240100.6:170-305	ENST00000240100.6	170	305	6	54	173	-7.58015
ENST00000240100.6:198-204	ENST00000240100.6	198	204	50	170	4	-7.62753
ENST00000240100.6:33-120	ENST00000240100.6	33	120	18	51	0	-5.88689
ENST00000240100.6:42-120	ENST00000240100.6	42	120	11	50	0	-6.10647
ENST00000240285.9:101-272	ENST00000240285.9	101	272	18	30	6	-4.08746
ENST00000240285.9:111-210	ENST00000240285.9	111	210	28	6	12	4.15943
ENST00000240285.9:122-272	ENST00000240285.9	122	272	18	29	5	-4.14191
ENST00000240285.9:126-210	ENST00000240285.9	126	210	26	5	12	4.08351
ENST00000240285.9:14-272	ENST00000240285.9	14	272	21	71	11	-5.93532
ENST00000240285.9:196-328	ENST00000240285.9	196	328	257	39	32	8.23066
ENST00000240285.9:206-272	ENST00000240285.9	206	272	17	27	2	-4.43644
ENST00000240285.9:229-328	ENST00000240285.9	229	328	255	24	5	8.6803
ENST00000240285.9:25-328	ENST00000240285.9	25	328	266	41	75	7.85831
ENST00000240285.9:268-328	ENST00000240285.9	268	328	255	21	5	8.71147
ENST00000240285.9:30-54	ENST00000240285.9	30	54	40	2	1	6.1288
ENST00000240285.9:318-348	ENST00000240285.9	318	348	10	268	17	-8.78257
ENST00000240285.9:324-348	ENST00000240285.9	324	348	10	267	10	-8.84947
ENST00000240285.9:42-54	ENST00000240285.9	42	54	40	2	1	6.1288
ENST00000240285.9:50-272	ENST00000240285.9	50	272	20	69	9	-5.98799
ENST00000240285.9:66-210	ENST00000240285.9	66	210	29	9	13	3.82543
ENST00000240285.9:81-210	ENST00000240285.9	81	210	29	8	13	3.9486
ENST00000240285.9:9-54	ENST00000240285.9	9	54	41	2	2	6.10014
ENST00000241393.3:19-64	ENST00000241393.3	19	64	2	11	0	-4.07435
ENST00000241393.3:22-64	ENST00000241393.3	22	64	2	11	0	-4.07435
ENST00000241393.3:26-50	ENST00000241393.3	26	50	6	0	1	3.30117
ENST00000241393.3:46-64	ENST00000241393.3	46	64	2	8	0	-3.51096
ENST00000241704.7:115-205	ENST00000241704.7	115	205	8	1	4	2.7425
ENST00000241704.7:85-205	ENST00000241704.7	85	205	8	1	4	2.7425
ENST00000242057.8:104-110	ENST00000242057.8	104	110	2	31	2	-5.61639
ENST00000242057.8:292-484	ENST00000242057.8	292	484	22	2	27	-4.43217
ENST00000242057.8:31-292	ENST00000242057.8	31	292	6	24	40	-4.6893
ENST00000242057.8:328-484	ENST00000242057.8	328	484	20	1	27	-4.56224
ENST00000242057.8:337-484	ENST00000242057.8	337	484	20	1	27	-4.56224
ENST00000242057.8:35-110	ENST00000242057.8	35	110	3	31	2	-5.52878
ENST00000242057.8:363-471	ENST00000242057.8	363	471	27	1	1	5.57352
ENST00000242057.8:370-484	ENST00000242057.8	370	484	1	1	27	-5.57352
ENST00000242057.8:414-471	ENST00000242057.8	414	471	27	1	1	5.57352
ENST00000242057.8:438-471	ENST00000242057.8	438	471	27	1	0	5.67847
ENST00000242057.8:51-186	ENST00000242057.8	51	186	35	5	16	4.68249
ENST00000242057.8:56-110	ENST00000242057.8	56	110	3	31	2	-5.52878
ENST00000242057.8:69-186	ENST00000242057.8	69	186	35	5	16	4.68249
ENST00000242057.8:9-186	ENST00000242057.8	9	186	35	5	16	4.68249
ENST00000242591.9:141-183	ENST00000242591.9	141	183	0	8	0	-4.08746
ENST00000242591.9:144-183	ENST00000242591.9	144	183	0	8	0	-4.08746
ENST00000242591.9:99-183	ENST00000242591.9	99	183	0	11	0	-4.52356
ENST00000242719.3:102-327	ENST00000242719.3	102	327	1	2	1	-0.584963
ENST00000242719.3:114-327	ENST00000242719.3	114	327	1	2	1	-0.584963
ENST00000242719.3:23-161	ENST00000242719.3	23	161	3	6	3	-1.32193
ENST00000242719.3:41-161	ENST00000242719.3	41	161	3	6	3	-1.32193
ENST00000242719.3:56-161	ENST00000242719.3	56	161	3	6	3	-1.32193
ENST00000242719.3:71-161	ENST00000242719.3	71	161	2	2	2	0
ENST00000242827.10:9-48	ENST00000242827.10	9	48	1	3	10	-3.4021
ENST00000243563.7:121-505	ENST00000243563.7	121	505	17	4	4	3.85997
ENST00000243563.7:125-188	ENST00000243563.7	125	188	3	1	4	-1.45943
ENST00000243563.7:142-505	ENST00000243563.7	142	505	17	4	4	3.85997
ENST00000243563.7:19-505	ENST00000243563.7	19	505	17	4	5	3.70895
ENST00000243563.7:52-505	ENST00000243563.7	52	505	17	4	5	3.70895
ENST00000243563.7:63-156	ENST00000243563.7	63	156	1	1	1	0
ENST00000243563.7:69-156	ENST00000243563.7	69	156	1	1	1	0
ENST00000243563.7:89-188	ENST00000243563.7	89	188	3	2	4	-0.736966
ENST00000243563.7:95-188	ENST00000243563.7	95	188	3	2	4	-0.736966
ENST00000243639.8:102-108	ENST00000243639.8	102	108	0	3	0	-2.80735
ENST00000244230.6:132-216	ENST00000244230.6	132	216	4	2	7	-1.97199
ENST00000244230.6:148-259	ENST00000244230.6	148	259	3	8	2	-2.52838
ENST00000244230.6:154-259	ENST00000244230.6	154	259	2	8	2	-2.80735
ENST00000244230.6:164-347	ENST00000244230.6	164	347	7	4	1	2.45943
ENST00000244230.6:179-347	ENST00000244230.6	179	347	7	4	1	2.45943
ENST00000244230.6:212-347	ENST00000244230.6	212	347	3	3	1	1.09954
ENST00000244520.9:80-110	ENST00000244520.9	80	110	6	0	0	3.70044
ENST00000244745.3:1077-1290	ENST00000244745.3	1077	1290	7	36	2	-5.52147
ENST00000244745.3:1089-1290	ENST00000244745.3	1089	1290	5	28	2	-5.15727
ENST00000244745.3:1110-1290	ENST00000244745.3	1110	1290	5	27	2	-5.08246
ENST00000244745.3:1143-1290	ENST00000244745.3	1143	1290	5	26	2	-5.00409
ENST00000244745.3:1158-1290	ENST00000244745.3	1158	1290	5	26	2	-5.00409
ENST00000244745.3:1182-1290	ENST00000244745.3	1182	1290	4	24	2	-4.93546
ENST00000244745.3:1196-1271	ENST00000244745.3	1196	1271	2	3	13	-3.73697
ENST00000244745.3:1212-1290	ENST00000244745.3	1212	1290	4	24	2	-4.93546
ENST00000244745.3:1237-1330	ENST00000244745.3	1237	1330	17	15	17	0.21818
ENST00000244745.3:1255-1330	ENST00000244745.3	1255	1330	16	13	17	-0.646363
ENST00000244745.3:1283-1310	ENST00000244745.3	1283	1310	3	15	14	-3.21917
ENST00000244745.3:1295-1310	ENST00000244745.3	1295	1310	3	14	3	-3.71149
ENST00000244745.3:1306-1330	ENST00000244745.3	1306	1330	0	10	0	-4.39232
ENST00000244745.3:1331-1499	ENST00000244745.3	1331	1499	4	3	8	-1.926
ENST00000244745.3:1400-1499	ENST00000244745.3	1400	1499	4	3	8	-1.926
ENST00000244745.3:1485-1737	ENST00000244745.3	1485	1737	3	9	6	-2
ENST00000245185.5:364-439	ENST00000245185.5	364	439	7	31	2	-5.2114
ENST00000245185.5:376-439	ENST00000245185.5	376	439	7	31	2	-5.2114
ENST00000245185.5:388-439	ENST00000245185.5	388	439	7	31	2	-5.2114
ENST00000245185.5:424-439	ENST00000245185.5	424	439	2	29	2	-5.49767
ENST00000245615.5:109-322	ENST00000245615.5	109	322	2	5	1	-2.08746
ENST00000245615.5:148-322	ENST00000245615.5	148	322	2	5	1	-2.08746
ENST00000245615.5:184-322	ENST00000245615.5	184	322	2	5	1	-2.08746
ENST00000245615.5:19-322	ENST00000245615.5	19	322	2	5	1	-2.08746
ENST00000245615.5:213-345	ENST00000245615.5	213	345	1	8	5	-2.65208
ENST00000245615.5:238-322	ENST00000245615.5	238	322	2	5	1	-2.08746
ENST00000245615.5:244-322	ENST00000245615.5	244	322	2	4	1	-1.58496
ENST00000245615.5:31-322	ENST00000245615.5	31	322	2	5	1	-2.08746
ENST00000245615.5:318-345	ENST00000245615.5	318	345	0	7	0	-3.90689
ENST00000245615.5:33-345	ENST00000245615.5	33	345	1	8	5	-2.65208
ENST00000245615.5:66-345	ENST00000245615.5	66	345	1	8	5	-2.65208
ENST00000245680.6:211-349	ENST00000245680.6	211	349	44	2	10	5.7625
ENST00000245680.6:312-360	ENST00000245680.6	312	360	14	86	4	-6.86371
ENST00000245680.6:333-360	ENST00000245680.6	333	360	13	85	4	-6.86964
ENST00000245680.6:345-360	ENST00000245680.6	345	360	11	52	2	-6.05678
ENST00000245680.6:354-360	ENST00000245680.6	354	360	3	42	1	-6.14355
ENST00000245787.8:0-183	ENST00000245787.8	0	183	7	0	0	3.90689
ENST00000245787.8:33-183	ENST00000245787.8	33	183	7	0	0	3.90689
ENST00000245787.8:40-202	ENST00000245787.8	40	202	0	0	7	-3.90689
ENST00000245787.8:6-183	ENST00000245787.8	6	183	7	0	0	3.90689
ENST00000245787.8:73-202	ENST00000245787.8	73	202	0	0	5	-3.45943
ENST00000245787.8:98-113	ENST00000245787.8	98	113	0	4	0	-3.16993
ENST00000245932.10:103-169	ENST00000245932.10	103	169	2	4	15	-3.90689
ENST00000245932.10:110-290	ENST00000245932.10	110	290	52	23	7	5.28811
ENST00000245932.10:121-169	ENST00000245932.10	121	169	2	4	14	-3.74416
ENST00000245932.10:124-169	ENST00000245932.10	124	169	2	4	14	-3.74416
ENST00000245932.10:13-52	ENST00000245932.10	13	52	25	124	10	-7.18777
ENST00000245932.10:137-290	ENST00000245932.10	137	290	52	22	6	5.38888
ENST00000245932.10:140-290	ENST00000245932.10	140	290	52	22	6	5.38888
ENST00000245932.10:15-87	ENST00000245932.10	15	87	10	27	124	-7.14931
ENST00000245932.10:19-52	ENST00000245932.10	19	52	25	124	10	-7.18777
ENST00000245932.10:245-290	ENST00000245932.10	245	290	2	2	0	1.58496
ENST00000245932.10:28-52	ENST00000245932.10	28	52	25	124	10	-7.18777
ENST00000245932.10:36-87	ENST00000245932.10	36	87	10	27	124	-7.14931
ENST00000245932.10:41-290	ENST00000245932.10	41	290	176	33	34	7.39348
ENST00000245932.10:46-52	ENST00000245932.10	46	52	25	124	9	-7.2129
ENST00000245934.11:110-200	ENST00000245934.11	110	200	0	8	0	-4.08746
ENST00000245934.11:114-237	ENST00000245934.11	114	237	8	0	0	4.08746
ENST00000245934.11:116-200	ENST00000245934.11	116	200	0	8	0	-4.08746
ENST00000245934.11:125-200	ENST00000245934.11	125	200	0	8	0	-4.08746
ENST00000245934.11:27-237	ENST00000245934.11	27	237	8	0	0	4.08746
ENST00000245934.11:42-237	ENST00000245934.11	42	237	8	0	0	4.08746
ENST00000245934.11:53-200	ENST00000245934.11	53	200	0	8	0	-4.08746
ENST00000245934.11:65-200	ENST00000245934.11	65	200	0	8	0	-4.08746
ENST00000245934.11:80-200	ENST00000245934.11	80	200	0	8	0	-4.08746
ENST00000245934.11:87-237	ENST00000245934.11	87	237	8	0	0	4.08746
ENST00000246174.6:272-431	ENST00000246174.6	272	431	7	1	0	3.55459
ENST00000246174.6:278-431	ENST00000246174.6	278	431	7	1	0	3.55459
ENST00000246174.6:280-499	ENST00000246174.6	280	499	0	15	1	-4.77479
ENST00000246194.7:15-261	ENST00000246194.7	15	261	10	7	6	1.09115
ENST00000246194.7:2-443	ENST00000246194.7	2	443	6	10	7	-1.09115
ENST00000246229.4:101-155	ENST00000246229.4	101	155	2	1	2	0.485427
ENST00000246229.4:134-155	ENST00000246229.4	134	155	2	1	2	0.485427
ENST00000246229.4:18-171	ENST00000246229.4	18	171	1	2	3	-1
ENST00000246229.4:51-171	ENST00000246229.4	51	171	1	2	3	-1
ENST00000246229.4:63-171	ENST00000246229.4	63	171	1	2	3	-1
ENST00000246529.3:224-389	ENST00000246529.3	224	389	4	8	2	-2.32193
ENST00000246554.7:122-140	ENST00000246554.7	122	140	31	3	7	5.11107
ENST00000246554.7:124-181	ENST00000246554.7	124	181	36	161	4	-7.68974
ENST00000246554.7:127-181	ENST00000246554.7	127	181	31	157	4	-7.71016
ENST00000246554.7:133-181	ENST00000246554.7	133	181	30	153	4	-7.67413
ENST00000246554.7:136-181	ENST00000246554.7	136	181	30	153	4	-7.67413
ENST00000246554.7:14-140	ENST00000246554.7	14	140	31	4	9	4.86475
ENST00000246554.7:148-181	ENST00000246554.7	148	181	29	128	2	-7.38436
ENST00000246554.7:160-181	ENST00000246554.7	160	181	21	74	2	-6.44499
ENST00000246554.7:23-140	ENST00000246554.7	23	140	31	4	9	4.86475
ENST00000246554.7:95-140	ENST00000246554.7	95	140	31	4	9	4.86475
ENST00000246672.3:16-364	ENST00000246672.3	16	364	5	0	9	-3.28011
ENST00000246672.3:188-584	ENST00000246672.3	188	584	0	6	11	-3.54916
ENST00000246672.3:350-584	ENST00000246672.3	350	584	0	5	8	-3.09398
ENST00000246672.3:373-511	ENST00000246672.3	373	511	6	0	5	2.73039
ENST00000246672.3:380-584	ENST00000246672.3	380	584	0	5	8	-3.09398
ENST00000246672.3:4-364	ENST00000246672.3	4	364	5	0	9	-3.28011
ENST00000246672.3:64-364	ENST00000246672.3	64	364	5	0	6	-2.73039
ENST00000246672.3:79-364	ENST00000246672.3	79	364	4	0	6	-2.72247
ENST00000246868.6:10-28	ENST00000246868.6	10	28	1	11	3	-3.60881
ENST00000246868.6:22-28	ENST00000246868.6	22	28	1	9	3	-3.16993
ENST00000246868.6:24-39	ENST00000246868.6	24	39	3	1	0	2.16993
ENST00000247161.7:5-86	ENST00000247161.7	5	86	1	8	1	-3.43296
ENST00000247161.7:53-86	ENST00000247161.7	53	86	1	8	1	-3.43296
ENST00000248378.5:12-48	ENST00000248378.5	12	48	12	158	6	-7.98636
ENST00000248564.5:192-237	ENST00000248564.5	192	237	62	26	11	5.41401
ENST00000248564.5:197-260	ENST00000248564.5	197	260	27	67	29	-4.68821
ENST00000248564.5:207-237	ENST00000248564.5	207	237	10	21	2	-4.13303
ENST00000248564.5:241-415	ENST00000248564.5	241	415	85	100	16	-5.92862
ENST00000248564.5:256-415	ENST00000248564.5	256	415	80	84	11	-5.87648
ENST00000248564.5:325-415	ENST00000248564.5	325	415	75	39	7	5.86761
ENST00000248564.5:367-415	ENST00000248564.5	367	415	13	25	6	-3.76457
ENST00000248566.3:19-67	ENST00000248566.3	19	67	6	13	0	-3.84483
ENST00000248975.5:117-243	ENST00000248975.5	117	243	12	71	8	-6.3758
ENST00000248975.5:128-227	ENST00000248975.5	128	227	3	2	8	-2.52838
ENST00000248975.5:135-243	ENST00000248975.5	135	243	12	70	8	-6.34459
ENST00000248975.5:207-243	ENST00000248975.5	207	243	12	66	5	-6.34969
ENST00000248975.5:237-243	ENST00000248975.5	237	243	8	51	5	-5.97943
ENST00000248975.5:56-227	ENST00000248975.5	56	227	4	2	9	-2.63227
ENST00000249005.2:2-71	ENST00000249005.2	2	71	5	19	0	-4.65821
ENST00000249005.2:8-71	ENST00000249005.2	8	71	5	19	0	-4.65821
ENST00000249822.8:102-141	ENST00000249822.8	102	141	2	3	0	-1.926
ENST00000249822.8:16-232	ENST00000249822.8	16	232	3	0	6	-2.80735
ENST00000249822.8:64-232	ENST00000249822.8	64	232	3	0	6	-2.80735
ENST00000249822.8:91-232	ENST00000249822.8	91	232	3	0	6	-2.80735
ENST00000250495.9:43-145	ENST00000250495.9	43	145	0	5	0	-3.45943
ENST00000250495.9:61-145	ENST00000250495.9	61	145	0	5	0	-3.45943
ENST00000250495.9:91-145	ENST00000250495.9	91	145	0	5	0	-3.45943
ENST00000251607.10:33-90	ENST00000251607.10	33	90	0	30	0	-5.93074
ENST00000251607.10:39-90	ENST00000251607.10	39	90	0	30	0	-5.93074
ENST00000251607.10:48-90	ENST00000251607.10	48	90	0	30	0	-5.93074
ENST00000251607.10:75-90	ENST00000251607.10	75	90	0	30	0	-5.93074
ENST00000251822.6:324-465	ENST00000251822.6	324	465	14	1	0	4.66676
ENST00000251822.6:333-465	ENST00000251822.6	333	465	14	1	0	4.66676
ENST00000251822.6:484-502	ENST00000251822.6	484	502	1	0	4	-2.63227
ENST00000252936.7:12-36	ENST00000252936.7	12	36	6	20	4	-4.01792
ENST00000252936.7:15-36	ENST00000252936.7	15	36	6	20	4	-4.01792
ENST00000252936.7:21-36	ENST00000252936.7	21	36	3	8	0	-3.30875
ENST00000252984.11:31-127	ENST00000252984.11	31	127	4	4	1	1.58496
ENST00000252984.11:40-127	ENST00000252984.11	40	127	4	4	1	1.58496
ENST00000252984.11:43-127	ENST00000252984.11	43	127	4	4	1	1.58496
ENST00000252984.11:46-127	ENST00000252984.11	46	127	4	4	1	1.58496
ENST00000252984.11:64-127	ENST00000252984.11	64	127	4	4	1	1.58496
ENST00000252984.11:76-127	ENST00000252984.11	76	127	2	4	1	-1.58496
ENST00000252984.11:79-127	ENST00000252984.11	79	127	2	3	1	-1
ENST00000252992.8:19-118	ENST00000252992.8	19	118	1	3	6	-2.26303
ENST00000252992.8:50-80	ENST00000252992.8	50	80	1	6	1	-2.85798
ENST00000252992.8:53-80	ENST00000252992.8	53	80	1	6	1	-2.85798
ENST00000253024.9:108-123	ENST00000253024.9	108	123	2	204	66	-7.88318
ENST00000253024.9:114-123	ENST00000253024.9	114	123	1	200	66	-7.86042
ENST00000253024.9:60-123	ENST00000253024.9	60	123	2	204	67	-7.87463
ENST00000253039.8:29-152	ENST00000253039.8	29	152	6	9	22	-3.67013
ENST00000253039.8:34-232	ENST00000253039.8	34	232	23	10	7	3.56682
ENST00000253039.8:4-232	ENST00000253039.8	4	232	23	10	9	3.28011
ENST00000253039.8:60-126	ENST00000253039.8	60	126	6	21	2	-4.44352
ENST00000253039.8:8-152	ENST00000253039.8	8	152	6	9	22	-3.67013
ENST00000253122.9:243-291	ENST00000253122.9	243	291	4	51	2	-6.35663
ENST00000253122.9:269-419	ENST00000253122.9	269	419	0	4	31	-5.63642
ENST00000253122.9:276-291	ENST00000253122.9	276	291	4	25	0	-5.25966
ENST00000253122.9:281-419	ENST00000253122.9	281	419	0	2	12	-4.22607
ENST00000253251.12:1-208	ENST00000253251.12	1	208	0	5	5	-2.58496
ENST00000253251.12:121-208	ENST00000253251.12	121	208	0	5	5	-2.58496
ENST00000253251.12:137-158	ENST00000253251.12	137	158	5	5	0	2.58496
ENST00000253251.12:146-158	ENST00000253251.12	146	158	4	2	0	2.32193
ENST00000253251.12:149-158	ENST00000253251.12	149	158	4	1	0	2.63227
ENST00000253251.12:168-531	ENST00000253251.12	168	531	38	6	18	4.71646
ENST00000253251.12:171-531	ENST00000253251.12	171	531	38	6	18	4.71646
ENST00000253251.12:234-531	ENST00000253251.12	234	531	38	6	18	4.71646
ENST00000253251.12:28-208	ENST00000253251.12	28	208	0	5	5	-2.58496
ENST00000253251.12:290-578	ENST00000253251.12	290	578	19	40	6	-4.81605
ENST00000253251.12:299-578	ENST00000253251.12	299	578	19	40	6	-4.81605
ENST00000253251.12:330-531	ENST00000253251.12	330	531	38	6	17	4.75489
ENST00000253251.12:333-531	ENST00000253251.12	333	531	38	6	17	4.75489
ENST00000253251.12:348-531	ENST00000253251.12	348	531	38	5	17	4.853
ENST00000253251.12:354-531	ENST00000253251.12	354	531	38	5	17	4.853
ENST00000253251.12:384-531	ENST00000253251.12	384	531	38	5	17	4.853
ENST00000253251.12:447-531	ENST00000253251.12	447	531	35	2	13	5.12433
ENST00000253251.12:469-523	ENST00000253251.12	469	523	1	13	29	-4.83465
ENST00000253251.12:493-523	ENST00000253251.12	493	523	1	13	29	-4.83465
ENST00000253251.12:498-531	ENST00000253251.12	498	531	33	1	12	5.14886
ENST00000253251.12:503-578	ENST00000253251.12	503	578	13	35	1	-5.22528
ENST00000253251.12:515-578	ENST00000253251.12	515	578	1	24	0	-5.49953
ENST00000253251.12:70-208	ENST00000253251.12	70	208	0	5	5	-2.58496
ENST00000253251.12:700-718	ENST00000253251.12	700	718	7	11	0	-3.5025
ENST00000253251.12:706-718	ENST00000253251.12	706	718	7	11	0	-3.5025
ENST00000253251.12:79-208	ENST00000253251.12	79	208	0	5	5	-2.58496
ENST00000253699.7:16-43	ENST00000253699.7	16	43	4	15	1	-4.1127
ENST00000253699.7:22-43	ENST00000253699.7	22	43	4	12	1	-3.63364
ENST00000253699.7:384-489	ENST00000253699.7	384	489	3	1	1	1.37851
ENST00000253814.5:227-431	ENST00000253814.5	227	431	11	3	17	-3.39895
ENST00000254325.8:1-190	ENST00000254325.8	1	190	2	2	9	-3.09398
ENST00000254325.8:10-190	ENST00000254325.8	10	190	2	2	9	-3.09398
ENST00000254667.7:109-256	ENST00000254667.7	109	256	3	11	1	-3.60881
ENST00000254667.7:196-256	ENST00000254667.7	196	256	3	10	0	-3.71741
ENST00000254667.7:61-256	ENST00000254667.7	61	256	3	11	1	-3.60881
ENST00000254803.3:130-181	ENST00000254803.3	130	181	3	25	1	-5.2361
ENST00000254803.3:137-188	ENST00000254803.3	137	188	25	1	3	5.2361
ENST00000254803.3:151-181	ENST00000254803.3	151	181	3	25	1	-5.2361
ENST00000254803.3:154-181	ENST00000254803.3	154	181	2	24	1	-5.26887
ENST00000254803.3:175-181	ENST00000254803.3	175	181	1	8	0	-3.77259
ENST00000254940.9:287-302	ENST00000254940.9	287	302	2	3	0	-1.926
ENST00000254950.12:131-155	ENST00000254950.12	131	155	13	2	6	3.30117
ENST00000254950.12:14-155	ENST00000254950.12	14	155	13	3	6	3.03242
ENST00000254950.12:29-155	ENST00000254950.12	29	155	13	2	6	3.30117
ENST00000254977.7:104-293	ENST00000254977.7	104	293	4	4	4	0
ENST00000254977.7:137-293	ENST00000254977.7	137	293	4	4	4	0
ENST00000254977.7:149-293	ENST00000254977.7	149	293	4	4	4	0
ENST00000254977.7:199-241	ENST00000254977.7	199	241	4	4	4	0
ENST00000254977.7:226-241	ENST00000254977.7	226	241	4	4	4	0
ENST00000255174.2:2-59	ENST00000255174.2	2	59	4	4	8	-1.58496
ENST00000255174.2:26-59	ENST00000255174.2	26	59	4	4	8	-1.58496
ENST00000255174.2:55-121	ENST00000255174.2	55	121	18	19	10	-2.03787
ENST00000255174.2:7-121	ENST00000255174.2	7	121	20	21	14	-1.35819
ENST00000256015.4:26-212	ENST00000256015.4	26	212	7	11	80	-6.70214
ENST00000256015.4:29-212	ENST00000256015.4	29	212	7	11	80	-6.70214
ENST00000256015.4:33-141	ENST00000256015.4	33	141	9	79	3	-6.89135
ENST00000256015.4:63-141	ENST00000256015.4	63	141	9	79	3	-6.89135
ENST00000256015.4:69-141	ENST00000256015.4	69	141	9	79	3	-6.89135
ENST00000256015.4:78-141	ENST00000256015.4	78	141	8	53	3	-6.1718
ENST00000256015.4:91-232	ENST00000256015.4	91	232	41	5	9	5.44204
ENST00000256442.9:22-115	ENST00000256442.9	22	115	0	0	6	-3.70044
ENST00000256442.9:28-115	ENST00000256442.9	28	115	0	0	6	-3.70044
ENST00000256442.9:3-183	ENST00000256442.9	3	183	23	0	0	5.55459
ENST00000256442.9:37-115	ENST00000256442.9	37	115	0	0	6	-3.70044
ENST00000256442.9:56-71	ENST00000256442.9	56	71	0	6	0	-3.70044
ENST00000256495.3:327-387	ENST00000256495.3	327	387	5	9	2	-2.49185
ENST00000256495.3:336-387	ENST00000256495.3	336	387	5	7	2	-1.89308
ENST00000256495.3:383-437	ENST00000256495.3	383	437	8	17	5	-3.1375
ENST00000256495.3:419-437	ENST00000256495.3	419	437	6	13	1	-3.57289
ENST00000256495.3:423-564	ENST00000256495.3	423	564	23	22	14	1.79684
ENST00000256495.3:552-564	ENST00000256495.3	552	564	0	18	3	-4.7851
ENST00000256689.9:105-120	ENST00000256689.9	105	120	7	6	12	-1.79909
ENST00000256689.9:121-142	ENST00000256689.9	121	142	9	1	2	3.39232
ENST00000256689.9:135-342	ENST00000256689.9	135	342	146	713	95	-9.53344
ENST00000256689.9:155-188	ENST00000256689.9	155	188	1	81	2	-7.24317
ENST00000256689.9:167-188	ENST00000256689.9	167	188	0	72	2	-7.10144
ENST00000256689.9:184-310	ENST00000256689.9	184	310	121	32	23	6.6587
ENST00000256689.9:189-342	ENST00000256689.9	189	342	63	701	94	-9.8233
ENST00000256689.9:196-310	ENST00000256689.9	196	310	66	31	19	4.99299
ENST00000256689.9:207-342	ENST00000256689.9	207	342	58	598	92	-9.52097
ENST00000256689.9:220-310	ENST00000256689.9	220	310	16	30	17	-2.76755
ENST00000256689.9:253-310	ENST00000256689.9	253	310	13	30	16	-3.22849
ENST00000256689.9:257-299	ENST00000256689.9	257	299	14	14	12	0.263034
ENST00000256689.9:260-299	ENST00000256689.9	260	299	12	14	5	-2.41213
ENST00000256689.9:282-342	ENST00000256689.9	282	342	42	584	81	-9.60088
ENST00000256689.9:300-342	ENST00000256689.9	300	342	42	583	78	-9.61092
ENST00000256689.9:306-342	ENST00000256689.9	306	342	42	582	63	-9.67627
ENST00000256689.9:310-328	ENST00000256689.9	310	328	102	22	20	6.52617
ENST00000256689.9:324-342	ENST00000256689.9	324	342	33	554	46	-9.71041
ENST00000256689.9:330-342	ENST00000256689.9	330	342	20	480	34	-9.58895
ENST00000256689.9:375-417	ENST00000256689.9	375	417	19	13	3	3.60881
ENST00000256689.9:417-444	ENST00000256689.9	417	444	53	42	9	4.96578
ENST00000256689.9:43-142	ENST00000256689.9	43	142	15	13	9	1.32971
ENST00000256689.9:46-142	ENST00000256689.9	46	142	15	13	9	1.32971
ENST00000256689.9:87-120	ENST00000256689.9	87	120	7	6	12	-1.79909
ENST00000256996.8:115-154	ENST00000256996.8	115	154	21	4	3	4.51907
ENST00000256996.8:150-165	ENST00000256996.8	150	165	3	67	3	-6.82297
ENST00000256996.8:85-154	ENST00000256996.8	85	154	21	4	3	4.51907
ENST00000256996.8:87-165	ENST00000256996.8	87	165	3	67	7	-6.66044
ENST00000257181.9:16-130	ENST00000257181.9	16	130	66	4	22	6.07356
ENST00000257181.9:43-130	ENST00000257181.9	43	130	66	4	22	6.07356
ENST00000257181.9:46-130	ENST00000257181.9	46	130	66	4	22	6.07356
ENST00000257181.9:63-75	ENST00000257181.9	63	75	20	65	1	-6.25497
ENST00000257245.8:105-114	ENST00000257245.8	105	114	1	58	2	-6.72367
ENST00000257435.11:117-171	ENST00000257435.11	117	171	0	17	3	-4.6837
ENST00000257435.11:138-171	ENST00000257435.11	138	171	0	17	0	-5.12928
ENST00000257435.11:45-171	ENST00000257435.11	45	171	0	17	3	-4.6837
ENST00000257435.11:48-171	ENST00000257435.11	48	171	0	17	3	-4.6837
ENST00000257604.9:111-321	ENST00000257604.9	111	321	3	2	0	1.926
ENST00000257604.9:71-308	ENST00000257604.9	71	308	0	4	2	-2.32193
ENST00000257604.9:74-308	ENST00000257604.9	74	308	0	4	2	-2.32193
ENST00000257604.9:92-308	ENST00000257604.9	92	308	0	3	2	-1.926
ENST00000257604.9:98-308	ENST00000257604.9	98	308	0	3	2	-1.926
ENST00000257663.3:108-285	ENST00000257663.3	108	285	6	8	25	-4.15131
ENST00000257663.3:150-285	ENST00000257663.3	150	285	6	8	25	-4.15131
ENST00000257663.3:189-285	ENST00000257663.3	189	285	6	8	25	-4.15131
ENST00000257663.3:213-285	ENST00000257663.3	213	285	6	8	19	-3.30875
ENST00000257663.3:216-285	ENST00000257663.3	216	285	2	6	19	-4.21378
ENST00000257663.3:269-368	ENST00000257663.3	269	368	12	7	2	3.02554
ENST00000257663.3:278-368	ENST00000257663.3	278	368	9	6	2	2.42033
ENST00000257663.3:281-368	ENST00000257663.3	281	368	9	6	2	2.42033
ENST00000257663.3:320-368	ENST00000257663.3	320	368	5	2	0	2.6845
ENST00000257694.12:100-202	ENST00000257694.12	100	202	7	10	2	-2.62244
ENST00000257694.12:104-146	ENST00000257694.12	104	146	1	2	3	-1
ENST00000257694.12:110-146	ENST00000257694.12	110	146	1	2	3	-1
ENST00000257694.12:29-146	ENST00000257694.12	29	146	1	2	5	-2.08746
ENST00000257694.12:33-216	ENST00000257694.12	33	216	2	9	10	-2.6845
ENST00000257694.12:60-216	ENST00000257694.12	60	216	2	8	10	-2.63227
ENST00000257694.12:66-216	ENST00000257694.12	66	216	2	8	10	-2.63227
ENST00000257694.12:69-216	ENST00000257694.12	69	216	2	8	10	-2.63227
ENST00000257694.12:81-216	ENST00000257694.12	81	216	2	8	10	-2.63227
ENST00000257694.12:84-216	ENST00000257694.12	84	216	2	8	10	-2.63227
ENST00000257694.12:95-146	ENST00000257694.12	95	146	1	2	4	-1.58496
ENST00000257724.7:126-132	ENST00000257724.7	126	132	10	5	1	3.10852
ENST00000257724.7:128-173	ENST00000257724.7	128	173	2	8	1	-3.14048
ENST00000257787.5:16-82	ENST00000257787.5	16	82	7	1	0	3.55459
ENST00000257787.5:2-101	ENST00000257787.5	2	101	3	1	8	-2.90689
ENST00000257787.5:24-159	ENST00000257787.5	24	159	2	17	4	-4.19411
ENST00000257787.5:27-159	ENST00000257787.5	27	159	2	17	4	-4.19411
ENST00000257787.5:52-82	ENST00000257787.5	52	82	7	1	0	3.55459
ENST00000257787.5:6-159	ENST00000257787.5	6	159	3	17	4	-4.02237
ENST00000257787.5:78-159	ENST00000257787.5	78	159	2	17	3	-4.33498
ENST00000257787.5:8-101	ENST00000257787.5	8	101	3	1	8	-2.90689
ENST00000257857.8:81-213	ENST00000257857.8	81	213	1	7	2	-2.848
ENST00000258301.5:12-216	ENST00000258301.5	12	216	4	8	11	-2.07635
ENST00000258301.5:51-216	ENST00000258301.5	51	216	4	8	11	-2.07635
ENST00000258301.5:54-216	ENST00000258301.5	54	216	4	6	11	-2.23704
ENST00000258301.5:57-216	ENST00000258301.5	57	216	4	6	11	-2.23704
ENST00000258341.4:0-237	ENST00000258341.4	0	237	11	15	12	-0.752072
ENST00000258341.4:189-237	ENST00000258341.4	189	237	8	15	3	-3.2303
ENST00000258418.9:0-390	ENST00000258418.9	0	390	2	11	9	-2.82597
ENST00000258418.9:189-390	ENST00000258418.9	189	390	2	5	8	-2.20163
ENST00000258418.9:264-390	ENST00000258418.9	264	390	2	5	8	-2.20163
ENST00000258418.9:6-390	ENST00000258418.9	6	390	2	11	9	-2.82597
ENST00000258418.9:63-390	ENST00000258418.9	63	390	2	11	9	-2.82597
ENST00000258729.7:193-310	ENST00000258729.7	193	310	7	12	7	-1.54749
ENST00000258729.7:214-310	ENST00000258729.7	214	310	7	12	7	-1.54749
ENST00000258729.7:220-310	ENST00000258729.7	220	310	7	12	7	-1.54749
ENST00000258729.7:230-341	ENST00000258729.7	230	341	12	7	7	1.54749
ENST00000258729.7:232-310	ENST00000258729.7	232	310	7	12	7	-1.54749
ENST00000258729.7:236-341	ENST00000258729.7	236	341	12	7	7	1.54749
ENST00000258729.7:238-310	ENST00000258729.7	238	310	7	12	7	-1.54749
ENST00000258729.7:259-310	ENST00000258729.7	259	310	7	6	6	0.14439
ENST00000258729.7:278-341	ENST00000258729.7	278	341	1	3	1	-1.37851
ENST00000258739.8:8-131	ENST00000258739.8	8	131	4	0	3	2.23704
ENST00000258975.6:102-186	ENST00000258975.6	102	186	14	13	0	3.8635
ENST00000258975.6:134-194	ENST00000258975.6	134	194	0	14	7	-3.90689
ENST00000258975.6:138-186	ENST00000258975.6	138	186	14	7	0	3.90689
ENST00000258975.6:5-194	ENST00000258975.6	5	194	8	15	13	-1.66297
ENST00000258975.6:60-186	ENST00000258975.6	60	186	14	13	8	1.47063
ENST00000258975.6:63-186	ENST00000258975.6	63	186	14	13	6	2.15528
ENST00000259154.8:17-122	ENST00000259154.8	17	122	6	25	19	-3.62293
ENST00000259154.8:4-100	ENST00000259154.8	4	100	6	5	20	-3.86917
ENST00000259154.8:47-122	ENST00000259154.8	47	122	6	15	19	-2.93546
ENST00000259154.8:83-122	ENST00000259154.8	83	122	5	14	18	-3.03372
ENST00000259526.3:168-204	ENST00000259526.3	168	204	2	8	1	-3.14048
ENST00000259895.8:151-175	ENST00000259895.8	151	175	4	20	13	-3.51506
ENST00000259895.8:49-175	ENST00000259895.8	49	175	5	23	21	-3.69135
ENST00000260056.6:10-226	ENST00000260056.6	10	226	14	1	2	4.28322
ENST00000260056.6:114-198	ENST00000260056.6	114	198	2	14	0	-4.49185
ENST00000260056.6:118-226	ENST00000260056.6	118	226	14	0	1	4.66676
ENST00000260056.6:123-198	ENST00000260056.6	123	198	1	14	0	-4.66676
ENST00000260056.6:13-226	ENST00000260056.6	13	226	14	1	2	4.28322
ENST00000260056.6:136-226	ENST00000260056.6	136	226	11	0	1	4.2854
ENST00000260056.6:147-198	ENST00000260056.6	147	198	1	9	0	-3.96347
ENST00000260056.6:168-198	ENST00000260056.6	168	198	1	9	0	-3.96347
ENST00000260056.6:40-226	ENST00000260056.6	40	226	14	1	2	4.28322
ENST00000260056.6:58-226	ENST00000260056.6	58	226	14	1	2	4.28322
ENST00000260327.8:428-539	ENST00000260327.8	428	539	8	9	4	-1.58496
ENST00000260327.8:437-539	ENST00000260327.8	437	539	8	9	4	-1.58496
ENST00000260327.8:443-539	ENST00000260327.8	443	539	8	9	4	-1.58496
ENST00000260327.8:446-539	ENST00000260327.8	446	539	8	9	4	-1.58496
ENST00000260327.8:449-539	ENST00000260327.8	449	539	8	9	4	-1.58496
ENST00000260327.8:452-539	ENST00000260327.8	452	539	8	9	4	-1.58496
ENST00000260327.8:482-539	ENST00000260327.8	482	539	8	4	4	1.58496
ENST00000260361.8:121-229	ENST00000260361.8	121	229	0	13	1	-4.5502
ENST00000260361.8:157-229	ENST00000260361.8	157	229	0	12	1	-4.42368
ENST00000260361.8:175-229	ENST00000260361.8	175	229	0	12	1	-4.42368
ENST00000260361.8:196-229	ENST00000260361.8	196	229	0	9	1	-3.96347
ENST00000260361.8:201-225	ENST00000260361.8	201	225	1	0	9	-3.96347
ENST00000260803.8:16-82	ENST00000260803.8	16	82	0	1	6	-3.30117
ENST00000260803.8:26-116	ENST00000260803.8	26	116	1	11	0	-4.2854
ENST00000260803.8:49-82	ENST00000260803.8	49	82	0	1	6	-3.30117
ENST00000260803.8:68-116	ENST00000260803.8	68	116	0	11	0	-4.52356
ENST00000260956.8:100-163	ENST00000260956.8	100	163	46	24	26	3.35755
ENST00000260956.8:109-163	ENST00000260956.8	109	163	46	24	26	3.35755
ENST00000260956.8:112-163	ENST00000260956.8	112	163	46	24	26	3.35755
ENST00000260956.8:115-163	ENST00000260956.8	115	163	46	24	26	3.35755
ENST00000260956.8:118-163	ENST00000260956.8	118	163	46	23	26	3.44277
ENST00000260956.8:124-163	ENST00000260956.8	124	163	42	19	4	5.12165
ENST00000260956.8:130-163	ENST00000260956.8	130	163	38	17	3	5.04891
ENST00000260956.8:14-128	ENST00000260956.8	14	128	8	27	10	-3.9573
ENST00000260956.8:20-128	ENST00000260956.8	20	128	8	27	10	-3.9573
ENST00000260956.8:50-128	ENST00000260956.8	50	128	8	27	10	-3.9573
ENST00000260956.8:65-128	ENST00000260956.8	65	128	8	27	10	-3.9573
ENST00000260956.8:80-128	ENST00000260956.8	80	128	8	27	10	-3.9573
ENST00000261015.4:194-311	ENST00000261015.4	194	311	0	24	11	-4.6861
ENST00000261015.4:205-244	ENST00000261015.4	205	244	1	0	4	-2.63227
ENST00000261015.4:224-311	ENST00000261015.4	224	311	0	24	11	-4.6861
ENST00000261015.4:251-311	ENST00000261015.4	251	311	0	20	10	-4.39232
ENST00000261015.4:277-340	ENST00000261015.4	277	340	21	1	20	4.25873
ENST00000261015.4:290-311	ENST00000261015.4	290	311	0	15	10	-3.90689
ENST00000261015.4:300-327	ENST00000261015.4	300	327	14	21	0	-4.36457
ENST00000261015.4:330-513	ENST00000261015.4	330	513	2	11	3	-3.33985
ENST00000261015.4:336-513	ENST00000261015.4	336	513	2	11	2	-3.56071
ENST00000261015.4:396-513	ENST00000261015.4	396	513	2	11	2	-3.56071
ENST00000261015.4:434-464	ENST00000261015.4	434	464	0	0	11	-4.52356
ENST00000261015.4:438-513	ENST00000261015.4	438	513	2	11	0	-4.07435
ENST00000261015.4:456-513	ENST00000261015.4	456	513	2	10	0	-3.90689
ENST00000261015.4:543-651	ENST00000261015.4	543	651	2	0	2	1.58496
ENST00000261015.4:569-710	ENST00000261015.4	569	710	8	21	10	-3.09398
ENST00000261015.4:576-651	ENST00000261015.4	576	651	2	0	2	1.58496
ENST00000261015.4:620-710	ENST00000261015.4	620	710	6	21	10	-3.43079
ENST00000261015.4:638-710	ENST00000261015.4	638	710	6	19	10	-3.10434
ENST00000261015.4:653-710	ENST00000261015.4	653	710	6	19	10	-3.10434
ENST00000261015.4:692-710	ENST00000261015.4	692	710	1	14	1	-4.46761
ENST00000261015.4:695-710	ENST00000261015.4	695	710	1	14	1	-4.46761
ENST00000261017.9:102-210	ENST00000261017.9	102	210	17	10	5	2.96578
ENST00000261017.9:161-233	ENST00000261017.9	161	233	5	18	5	-3.70834
ENST00000261017.9:171-210	ENST00000261017.9	171	210	8	2	3	2.52838
ENST00000261017.9:177-210	ENST00000261017.9	177	210	8	1	3	2.90689
ENST00000261017.9:195-210	ENST00000261017.9	195	210	8	1	3	2.90689
ENST00000261017.9:33-210	ENST00000261017.9	33	210	17	11	5	2.91561
ENST00000261017.9:86-233	ENST00000261017.9	86	233	7	18	12	-2.56533
ENST00000261017.9:96-210	ENST00000261017.9	96	210	17	10	5	2.96578
ENST00000261023.7:77-149	ENST00000261023.7	77	149	0	24	3	-5.2854
ENST00000261023.7:92-149	ENST00000261023.7	92	149	0	24	3	-5.2854
ENST00000261034.6:105-165	ENST00000261034.6	105	165	4	20	0	-4.85798
ENST00000261034.6:150-165	ENST00000261034.6	150	165	4	20	0	-4.85798
ENST00000261249.6:21-339	ENST00000261249.6	21	339	15	5	5	3.16993
ENST00000261249.6:24-339	ENST00000261249.6	24	339	15	5	5	3.16993
ENST00000261249.6:93-339	ENST00000261249.6	93	339	7	1	1	3.16993
ENST00000261263.4:127-190	ENST00000261263.4	127	190	10	5	5	1.80735
ENST00000261263.4:169-190	ENST00000261263.4	169	190	10	0	4	3.56768
ENST00000261263.4:55-190	ENST00000261263.4	55	190	14	11	117	-7.27521
ENST00000261263.4:58-190	ENST00000261263.4	58	190	14	11	117	-7.27521
ENST00000261313.2:114-276	ENST00000261313.2	114	276	4	1	2	1.58496
ENST00000261313.2:138-276	ENST00000261313.2	138	276	4	1	2	1.58496
ENST00000261313.2:177-276	ENST00000261313.2	177	276	4	1	2	1.58496
ENST00000261313.2:183-276	ENST00000261313.2	183	276	4	1	2	1.58496
ENST00000261313.2:186-276	ENST00000261313.2	186	276	4	1	2	1.58496
ENST00000261313.2:60-276	ENST00000261313.2	60	276	4	1	2	1.58496
ENST00000261313.2:75-276	ENST00000261313.2	75	276	4	1	2	1.58496
ENST00000261402.6:104-1289	ENST00000261402.6	104	1289	2	3	3	-0.321928
ENST00000261402.6:1070-1289	ENST00000261402.6	1070	1289	0	3	2	-1.926
ENST00000261402.6:1096-1357	ENST00000261402.6	1096	1357	2	0	3	-1.926
ENST00000261402.6:1117-1357	ENST00000261402.6	1117	1357	2	0	3	-1.926
ENST00000261402.6:1141-1357	ENST00000261402.6	1141	1357	2	0	3	-1.926
ENST00000261402.6:1172-1289	ENST00000261402.6	1172	1289	0	3	2	-1.926
ENST00000261402.6:1183-1357	ENST00000261402.6	1183	1357	2	0	3	-1.926
ENST00000261402.6:1205-1289	ENST00000261402.6	1205	1289	0	3	2	-1.926
ENST00000261402.6:365-1289	ENST00000261402.6	365	1289	2	3	3	-0.321928
ENST00000261402.6:44-1289	ENST00000261402.6	44	1289	2	3	3	-0.321928
ENST00000261402.6:482-1289	ENST00000261402.6	482	1289	2	3	3	-0.321928
ENST00000261402.6:512-1289	ENST00000261402.6	512	1289	2	3	3	-0.321928
ENST00000261402.6:875-1289	ENST00000261402.6	875	1289	2	3	2	-0.36257
ENST00000261402.6:899-1289	ENST00000261402.6	899	1289	2	3	2	-0.36257
ENST00000261402.6:932-1289	ENST00000261402.6	932	1289	2	3	2	-0.36257
ENST00000261402.6:944-1289	ENST00000261402.6	944	1289	2	3	2	-0.36257
ENST00000261402.6:974-1289	ENST00000261402.6	974	1289	2	3	2	-0.36257
ENST00000261461.6:37-55	ENST00000261461.6	37	55	2	14	0	-4.49185
ENST00000261461.6:51-399	ENST00000261461.6	51	399	2	35	9	-5.33752
ENST00000261483.4:588-765	ENST00000261483.4	588	765	1	3	3	-1.09954
ENST00000261483.4:610-988	ENST00000261483.4	610	988	8	17	4	-3.34659
ENST00000261483.4:630-765	ENST00000261483.4	630	765	1	3	3	-1.09954
ENST00000261483.4:634-988	ENST00000261483.4	634	988	8	17	4	-3.34659
ENST00000261483.4:645-765	ENST00000261483.4	645	765	1	3	3	-1.09954
ENST00000261483.4:649-988	ENST00000261483.4	649	988	7	17	4	-3.45003
ENST00000261483.4:673-988	ENST00000261483.4	673	988	7	14	4	-2.87184
ENST00000261483.4:685-988	ENST00000261483.4	685	988	7	14	4	-2.87184
ENST00000261483.4:706-988	ENST00000261483.4	706	988	7	14	4	-2.87184
ENST00000261483.4:745-988	ENST00000261483.4	745	988	5	14	4	-3.15592
ENST00000261483.4:781-988	ENST00000261483.4	781	988	5	14	1	-3.83794
ENST00000261483.4:801-897	ENST00000261483.4	801	897	1	1	13	-4.33628
ENST00000261489.6:10-100	ENST00000261489.6	10	100	23	6	8	3.90689
ENST00000261489.6:122-155	ENST00000261489.6	122	155	2	3	5	-1.26303
ENST00000261489.6:18-78	ENST00000261489.6	18	78	7	17	4	-3.45003
ENST00000261489.6:35-95	ENST00000261489.6	35	95	6	8	21	-3.62894
ENST00000261489.6:41-95	ENST00000261489.6	41	95	6	8	21	-3.62894
ENST00000261489.6:54-78	ENST00000261489.6	54	78	2	15	3	-4.06178
ENST00000261489.6:58-100	ENST00000261489.6	58	100	21	5	3	4.40176
ENST00000261520.8:1-142	ENST00000261520.8	1	142	5	19	2	-4.32193
ENST00000261520.8:100-142	ENST00000261520.8	100	142	2	17	2	-4.48727
ENST00000261520.8:102-147	ENST00000261520.8	102	147	2	2	17	-4.48727
ENST00000261520.8:104-218	ENST00000261520.8	104	218	17	2	2	4.48727
ENST00000261520.8:108-147	ENST00000261520.8	108	147	2	2	17	-4.48727
ENST00000261520.8:115-142	ENST00000261520.8	115	142	2	16	2	-4.36457
ENST00000261520.8:46-142	ENST00000261520.8	46	142	5	19	2	-4.32193
ENST00000261520.8:56-218	ENST00000261520.8	56	218	19	2	5	4.32193
ENST00000261520.8:74-218	ENST00000261520.8	74	218	18	2	4	4.32193
ENST00000261520.8:81-147	ENST00000261520.8	81	147	2	2	17	-4.48727
ENST00000261520.8:86-218	ENST00000261520.8	86	218	17	2	2	4.48727
ENST00000261520.8:93-147	ENST00000261520.8	93	147	2	2	17	-4.48727
ENST00000261520.8:95-218	ENST00000261520.8	95	218	17	2	2	4.48727
ENST00000261520.8:97-142	ENST00000261520.8	97	142	2	17	2	-4.48727
ENST00000261637.4:10-88	ENST00000261637.4	10	88	26	2	2	5.30012
ENST00000261637.4:21-54	ENST00000261637.4	21	54	2	26	2	-5.30012
ENST00000261681.8:419-548	ENST00000261681.8	419	548	3	5	5	-0.691878
ENST00000261681.8:437-548	ENST00000261681.8	437	548	3	5	5	-0.691878
ENST00000261681.8:446-548	ENST00000261681.8	446	548	3	5	5	-0.691878
ENST00000261692.6:24-237	ENST00000261692.6	24	237	3	2	0	1.926
ENST00000261692.6:48-237	ENST00000261692.6	48	237	3	2	0	1.926
ENST00000261721.8:155-179	ENST00000261721.8	155	179	3	9	0	-3.52356
ENST00000261741.9:33-105	ENST00000261741.9	33	105	0	3	25	-5.35504
ENST00000261741.9:37-85	ENST00000261741.9	37	85	3	25	0	-5.35504
ENST00000261741.9:39-105	ENST00000261741.9	39	105	0	3	25	-5.35504
ENST00000261741.9:58-85	ENST00000261741.9	58	85	3	25	0	-5.35504
ENST00000261772.12:127-136	ENST00000261772.12	127	136	17	9	1	3.92811
ENST00000261776.9:1-43	ENST00000261776.9	1	43	21	0	4	4.94673
ENST00000261776.9:15-33	ENST00000261776.9	15	33	4	21	0	-4.94673
ENST00000261839.11:36-60	ENST00000261839.11	36	60	11	38	0	-5.57943
ENST00000261839.11:45-60	ENST00000261839.11	45	60	11	38	0	-5.57943
ENST00000261839.11:9-60	ENST00000261839.11	9	60	11	38	0	-5.57943
ENST00000261845.6:125-191	ENST00000261845.6	125	191	6	36	11	-4.91864
ENST00000261845.6:158-191	ENST00000261845.6	158	191	5	36	11	-5.00864
ENST00000261845.6:177-246	ENST00000261845.6	177	246	52	49	7	5.17659
ENST00000261845.6:192-246	ENST00000261845.6	192	246	25	38	5	-4.66575
ENST00000261845.6:196-298	ENST00000261845.6	196	298	34	5	24	4.43741
ENST00000261845.6:205-298	ENST00000261845.6	205	298	34	5	24	4.43741
ENST00000261845.6:211-298	ENST00000261845.6	211	298	34	5	24	4.43741
ENST00000261845.6:217-298	ENST00000261845.6	217	298	34	5	24	4.43741
ENST00000261845.6:220-298	ENST00000261845.6	220	298	34	5	24	4.43741
ENST00000261845.6:225-246	ENST00000261845.6	225	246	24	34	5	-4.43741
ENST00000261845.6:235-298	ENST00000261845.6	235	298	34	4	1	5.70683
ENST00000261845.6:359-407	ENST00000261845.6	359	407	3	3	1	1.09954
ENST00000261845.6:362-407	ENST00000261845.6	362	407	3	3	1	1.09954
ENST00000261845.6:365-407	ENST00000261845.6	365	407	3	3	1	1.09954
ENST00000261845.6:386-407	ENST00000261845.6	386	407	2	3	0	-1.926
ENST00000261845.6:390-489	ENST00000261845.6	390	489	3	0	2	1.926
ENST00000261845.6:396-489	ENST00000261845.6	396	489	3	0	2	1.926
ENST00000261845.6:50-191	ENST00000261845.6	50	191	19	105	14	-6.84276
ENST00000261845.6:60-162	ENST00000261845.6	60	162	67	2	14	6.45091
ENST00000261858.6:113-143	ENST00000261858.6	113	143	2	14	1	-4.28322
ENST00000261858.6:116-143	ENST00000261858.6	116	143	2	14	1	-4.28322
ENST00000261858.6:147-189	ENST00000261858.6	147	189	14	63	3	-6.27659
ENST00000261858.6:15-132	ENST00000261858.6	15	132	16	1	0	4.87543
ENST00000261858.6:168-189	ENST00000261858.6	168	189	14	63	3	-6.27659
ENST00000261858.6:180-189	ENST00000261858.6	180	189	13	59	2	-6.23142
ENST00000261858.6:26-143	ENST00000261858.6	26	143	2	22	2	-4.98956
ENST00000261858.6:32-143	ENST00000261858.6	32	143	2	22	2	-4.98956
ENST00000261858.6:48-132	ENST00000261858.6	48	132	16	1	0	4.87543
ENST00000261858.6:64-151	ENST00000261858.6	64	151	2	2	21	-4.90111
ENST00000261858.6:67-151	ENST00000261858.6	67	151	2	2	21	-4.90111
ENST00000261858.6:95-143	ENST00000261858.6	95	143	2	19	2	-4.70766
ENST00000261858.6:99-132	ENST00000261858.6	99	132	11	1	0	4.2854
ENST00000262146.8:23-83	ENST00000262146.8	23	83	5	14	30	-4.36686
ENST00000262146.8:26-83	ENST00000262146.8	26	83	4	14	30	-4.49185
ENST00000262146.8:47-83	ENST00000262146.8	47	83	4	7	30	-4.93592
ENST00000262146.8:71-83	ENST00000262146.8	71	83	1	7	6	-2.44057
ENST00000262187.9:163-400	ENST00000262187.9	163	400	11	14	75	-6.30852
ENST00000262187.9:181-400	ENST00000262187.9	181	400	11	14	75	-6.30852
ENST00000262187.9:184-400	ENST00000262187.9	184	400	11	13	74	-6.31307
ENST00000262187.9:187-400	ENST00000262187.9	187	400	10	13	74	-6.35192
ENST00000262187.9:200-380	ENST00000262187.9	200	380	11	74	10	-6.42467
ENST00000262187.9:202-400	ENST00000262187.9	202	400	10	11	74	-6.42467
ENST00000262187.9:208-400	ENST00000262187.9	208	400	10	11	74	-6.42467
ENST00000262187.9:211-400	ENST00000262187.9	211	400	10	11	74	-6.42467
ENST00000262187.9:254-380	ENST00000262187.9	254	380	11	74	10	-6.42467
ENST00000262187.9:305-380	ENST00000262187.9	305	380	10	74	8	-6.53781
ENST00000262187.9:310-400	ENST00000262187.9	310	400	8	10	74	-6.53781
ENST00000262187.9:314-380	ENST00000262187.9	314	380	10	74	8	-6.53781
ENST00000262244.5:0-312	ENST00000262244.5	0	312	14	6	22	-3.34239
ENST00000262244.5:107-218	ENST00000262244.5	107	218	5	11	3	-2.69459
ENST00000262244.5:111-312	ENST00000262244.5	111	312	14	6	21	-3.2085
ENST00000262244.5:116-218	ENST00000262244.5	116	218	4	9	2	-2.63227
ENST00000262244.5:126-312	ENST00000262244.5	126	312	12	5	21	-3.47999
ENST00000262244.5:13-178	ENST00000262244.5	13	178	3	5	4	-0.584963
ENST00000262244.5:135-312	ENST00000262244.5	135	312	12	5	21	-3.47999
ENST00000262244.5:164-218	ENST00000262244.5	164	218	2	9	2	-3.09398
ENST00000262244.5:168-312	ENST00000262244.5	168	312	12	3	18	-3.50635
ENST00000262244.5:174-312	ENST00000262244.5	174	312	10	3	17	-3.43296
ENST00000262244.5:208-286	ENST00000262244.5	208	286	3	17	3	-4.17341
ENST00000262244.5:224-239	ENST00000262244.5	224	239	4	1	0	2.63227
ENST00000262244.5:235-286	ENST00000262244.5	235	286	3	14	3	-3.71149
ENST00000262244.5:26-218	ENST00000262244.5	26	218	5	11	3	-2.69459
ENST00000262244.5:33-312	ENST00000262244.5	33	312	14	6	22	-3.34239
ENST00000262244.5:39-312	ENST00000262244.5	39	312	14	6	22	-3.34239
ENST00000262244.5:4-178	ENST00000262244.5	4	178	3	5	4	-0.584963
ENST00000262244.5:68-218	ENST00000262244.5	68	218	5	11	3	-2.69459
ENST00000262293.8:111-303	ENST00000262293.8	111	303	19	4	10	3.50635
ENST00000262293.8:115-235	ENST00000262293.8	115	235	2	10	3	-3.10434
ENST00000262293.8:119-224	ENST00000262293.8	119	224	10	3	2	3.10434
ENST00000262293.8:127-235	ENST00000262293.8	127	235	2	10	3	-3.10434
ENST00000262293.8:129-303	ENST00000262293.8	129	303	19	4	10	3.50635
ENST00000262293.8:157-235	ENST00000262293.8	157	235	2	10	3	-3.10434
ENST00000262293.8:159-303	ENST00000262293.8	159	303	19	4	10	3.50635
ENST00000262293.8:237-303	ENST00000262293.8	237	303	16	2	0	4.71882
ENST00000262293.8:251-308	ENST00000262293.8	251	308	0	16	2	-4.71882
ENST00000262320.7:55-334	ENST00000262320.7	55	334	1	3	0	-2.16993
ENST00000262320.7:61-334	ENST00000262320.7	61	334	1	3	0	-2.16993
ENST00000262376.10:119-488	ENST00000262376.10	119	488	6	6	13	-2.29866
ENST00000262376.10:142-502	ENST00000262376.10	142	502	15	6	5	3
ENST00000262376.10:169-502	ENST00000262376.10	169	502	15	6	5	3
ENST00000262376.10:193-502	ENST00000262376.10	193	502	15	3	5	3.55859
ENST00000262376.10:229-502	ENST00000262376.10	229	502	15	3	5	3.55859
ENST00000262376.10:269-488	ENST00000262376.10	269	488	3	3	9	-2.53605
ENST00000262376.10:300-594	ENST00000262376.10	300	594	3	17	3	-4.17341
ENST00000262376.10:316-502	ENST00000262376.10	316	502	8	3	3	2.19265
ENST00000262376.10:332-488	ENST00000262376.10	332	488	3	3	4	-0.263034
ENST00000262376.10:502-604	ENST00000262376.10	502	604	8	1	0	3.77259
ENST00000262376.10:526-604	ENST00000262376.10	526	604	6	1	0	3.30117
ENST00000262376.10:550-604	ENST00000262376.10	550	604	2	1	0	1.58496
ENST00000262376.10:65-488	ENST00000262376.10	65	488	9	8	15	-1.88264
ENST00000262376.10:89-488	ENST00000262376.10	89	488	9	8	15	-1.88264
ENST00000262455.6:24-135	ENST00000262455.6	24	135	3	9	5	-2.10236
ENST00000262455.6:75-135	ENST00000262455.6	75	135	2	9	5	-2.49185
ENST00000262482.10:159-204	ENST00000262482.10	159	204	3	4	2	-0.736966
ENST00000262482.10:169-280	ENST00000262482.10	169	280	4	2	3	0.736966
ENST00000262482.10:178-280	ENST00000262482.10	178	280	4	2	3	0.736966
ENST00000262482.10:181-280	ENST00000262482.10	181	280	4	2	3	0.736966
ENST00000262482.10:276-570	ENST00000262482.10	276	570	8	42	17	-4.84755
ENST00000262482.10:318-570	ENST00000262482.10	318	570	8	42	17	-4.84755
ENST00000262482.10:348-570	ENST00000262482.10	348	570	8	42	17	-4.84755
ENST00000262482.10:378-570	ENST00000262482.10	378	570	8	42	17	-4.84755
ENST00000262482.10:387-570	ENST00000262482.10	387	570	8	42	17	-4.84755
ENST00000262482.10:469-526	ENST00000262482.10	469	526	31	15	7	4.16234
ENST00000262482.10:474-570	ENST00000262482.10	474	570	8	42	12	-5.10515
ENST00000262482.10:495-570	ENST00000262482.10	495	570	8	30	9	-4.37171
ENST00000262482.10:498-570	ENST00000262482.10	498	570	4	27	9	-4.52042
ENST00000262482.10:540-570	ENST00000262482.10	540	570	1	11	1	-4.03427
ENST00000262482.10:546-570	ENST00000262482.10	546	570	1	11	1	-4.03427
ENST00000262482.10:558-570	ENST00000262482.10	558	570	1	8	1	-3.43296
ENST00000262482.10:78-204	ENST00000262482.10	78	204	4	7	6	-0.866733
ENST00000262510.10:102-186	ENST00000262510.10	102	186	1	1	6	-2.85798
ENST00000262510.10:109-148	ENST00000262510.10	109	148	0	6	1	-3.30117
ENST00000262510.10:120-186	ENST00000262510.10	120	186	1	1	4	-2
ENST00000262510.10:18-96	ENST00000262510.10	18	96	0	3	0	-2.80735
ENST00000262510.10:65-200	ENST00000262510.10	65	200	8	1	4	2.7425
ENST00000262510.10:92-200	ENST00000262510.10	92	200	8	1	2	3.14048
ENST00000262644.8:45-156	ENST00000262644.8	45	156	18	11	1	3.96347
ENST00000262644.8:72-156	ENST00000262644.8	72	156	18	11	1	3.96347
ENST00000262644.8:75-156	ENST00000262644.8	75	156	17	11	1	3.8597
ENST00000262713.6:176-254	ENST00000262713.6	176	254	1	10	4	-3.23266
ENST00000262713.6:188-254	ENST00000262713.6	188	254	1	10	4	-3.23266
ENST00000262713.6:203-254	ENST00000262713.6	203	254	1	10	4	-3.23266
ENST00000262713.6:215-254	ENST00000262713.6	215	254	0	7	2	-3.27302
ENST00000262854.10:105-258	ENST00000262854.10	105	258	6	1	0	3.30117
ENST00000262854.10:111-258	ENST00000262854.10	111	258	6	1	0	3.30117
ENST00000262854.10:12-258	ENST00000262854.10	12	258	7	2	1	2.848
ENST00000262854.10:48-258	ENST00000262854.10	48	258	7	2	1	2.848
ENST00000262854.10:81-258	ENST00000262854.10	81	258	7	2	0	3.27302
ENST00000262960.13:10-136	ENST00000262960.13	10	136	6	37	1	-5.7242
ENST00000262960.13:118-136	ENST00000262960.13	118	136	5	37	1	-5.78987
ENST00000262960.13:37-136	ENST00000262960.13	37	136	6	37	1	-5.7242
ENST00000262960.13:58-136	ENST00000262960.13	58	136	5	37	1	-5.78987
ENST00000262960.13:60-240	ENST00000262960.13	60	240	1	5	37	-5.78987
ENST00000262960.13:73-136	ENST00000262960.13	73	136	5	37	1	-5.78987
ENST00000262962.11:40-55	ENST00000262962.11	40	55	8	0	2	3.51096
ENST00000262982.2:76-121	ENST00000262982.2	76	121	1	36	1	-6.03284
ENST00000262982.2:97-121	ENST00000262982.2	97	121	1	26	1	-5.51232
ENST00000263026.9:432-456	ENST00000263026.9	432	456	0	1	5	-3
ENST00000263026.9:444-456	ENST00000263026.9	444	456	0	1	3	-2.16993
ENST00000263056.5:108-225	ENST00000263056.5	108	225	4	2	1	1.58496
ENST00000263056.5:114-225	ENST00000263056.5	114	225	4	2	1	1.58496
ENST00000263056.5:131-479	ENST00000263056.5	131	479	3	6	2	-1.75002
ENST00000263056.5:151-199	ENST00000263056.5	151	199	0	1	4	-2.63227
ENST00000263056.5:155-479	ENST00000263056.5	155	479	3	6	2	-1.75002
ENST00000263056.5:165-225	ENST00000263056.5	165	225	4	0	1	2.63227
ENST00000263056.5:176-479	ENST00000263056.5	176	479	3	6	2	-1.75002
ENST00000263056.5:18-225	ENST00000263056.5	18	225	4	2	1	1.58496
ENST00000263056.5:33-225	ENST00000263056.5	33	225	4	2	1	1.58496
ENST00000263056.5:40-199	ENST00000263056.5	40	199	2	1	4	-1.58496
ENST00000263056.5:51-225	ENST00000263056.5	51	225	4	2	1	1.58496
ENST00000263056.5:77-479	ENST00000263056.5	77	479	3	6	4	-1.05445
ENST00000263056.5:87-225	ENST00000263056.5	87	225	4	2	1	1.58496
ENST00000263168.3:105-321	ENST00000263168.3	105	321	5	18	2	-4.19849
ENST00000263168.3:115-178	ENST00000263168.3	115	178	9	1	1	3.65951
ENST00000263168.3:125-185	ENST00000263168.3	125	185	2	0	8	-3.51096
ENST00000263168.3:15-321	ENST00000263168.3	15	321	6	18	2	-4.08746
ENST00000263168.3:160-178	ENST00000263168.3	160	178	8	1	0	3.77259
ENST00000263168.3:174-321	ENST00000263168.3	174	321	1	7	1	-3.16993
ENST00000263168.3:24-321	ENST00000263168.3	24	321	6	18	2	-4.08746
ENST00000263168.3:30-321	ENST00000263168.3	30	321	6	18	2	-4.08746
ENST00000263168.3:39-321	ENST00000263168.3	39	321	6	18	2	-4.08746
ENST00000263168.3:46-178	ENST00000263168.3	46	178	12	1	5	3.5025
ENST00000263168.3:523-604	ENST00000263168.3	523	604	0	5	1	-3
ENST00000263168.3:53-185	ENST00000263168.3	53	185	2	5	12	-3.21968
ENST00000263168.3:542-647	ENST00000263168.3	542	647	5	1	0	3
ENST00000263168.3:547-604	ENST00000263168.3	547	604	0	5	1	-3
ENST00000263168.3:84-321	ENST00000263168.3	84	321	5	18	2	-4.19849
ENST00000263168.3:94-178	ENST00000263168.3	94	178	12	1	4	3.63364
ENST00000263181.6:213-228	ENST00000263181.6	213	228	1	3	8	-2.90689
ENST00000263181.6:228-243	ENST00000263181.6	228	243	6	0	3	2.80735
ENST00000263239.6:91-112	ENST00000263239.6	91	112	7	1	4	2.45943
ENST00000263246.7:101-158	ENST00000263246.7	101	158	1	2	3	-1
ENST00000263246.7:106-169	ENST00000263246.7	106	169	3	1	1	1.37851
ENST00000263246.7:108-144	ENST00000263246.7	108	144	1	2	1	-0.584963
ENST00000263246.7:14-101	ENST00000263246.7	14	101	0	52	19	-5.89499
ENST00000263246.7:24-144	ENST00000263246.7	24	144	54	22	1	5.82034
ENST00000263246.7:72-144	ENST00000263246.7	72	144	54	22	1	5.82034
ENST00000263246.7:78-144	ENST00000263246.7	78	144	54	22	1	5.82034
ENST00000263246.7:84-144	ENST00000263246.7	84	144	54	17	1	5.96771
ENST00000263246.7:89-101	ENST00000263246.7	89	101	0	52	12	-6.13955
ENST00000263246.7:97-169	ENST00000263246.7	97	169	9	1	3	3.16993
ENST00000263253.8:101-251	ENST00000263253.8	101	251	1	3	1	-1.37851
ENST00000263253.8:147-177	ENST00000263253.8	147	177	2	1	0	1.58496
ENST00000263253.8:17-251	ENST00000263253.8	17	251	3	42	5	-5.87971
ENST00000263253.8:5-251	ENST00000263253.8	5	251	3	42	5	-5.87971
ENST00000263253.8:53-251	ENST00000263253.8	53	251	3	39	5	-5.73485
ENST00000263253.8:74-251	ENST00000263253.8	74	251	3	36	4	-5.64855
ENST00000263253.8:78-177	ENST00000263253.8	78	177	14	3	2	3.90689
ENST00000263253.8:85-268	ENST00000263253.8	85	268	3	3	9	-2.53605
ENST00000263256.6:33-87	ENST00000263256.6	33	87	1	6	2	-2.5025
ENST00000263256.6:57-87	ENST00000263256.6	57	87	1	6	2	-2.5025
ENST00000263270.10:144-168	ENST00000263270.10	144	168	1	13	0	-4.5502
ENST00000263270.10:96-168	ENST00000263270.10	96	168	1	13	1	-4.33628
ENST00000263277.7:208-226	ENST00000263277.7	208	226	12	11	3	2.72583
ENST00000263277.7:91-226	ENST00000263277.7	91	226	14	11	3	2.98706
ENST00000263360.10:75-318	ENST00000263360.10	75	318	1	8	1	-3.43296
ENST00000263464.7:149-161	ENST00000263464.7	149	161	8	26	2	-4.75489
ENST00000263464.7:20-161	ENST00000263464.7	20	161	8	27	3	-4.71786
ENST00000263464.7:29-161	ENST00000263464.7	29	161	8	27	3	-4.71786
ENST00000263464.7:35-161	ENST00000263464.7	35	161	8	26	3	-4.62817
ENST00000263464.7:41-161	ENST00000263464.7	41	161	8	26	3	-4.62817
ENST00000263464.7:44-161	ENST00000263464.7	44	161	8	26	3	-4.62817
ENST00000263464.7:47-161	ENST00000263464.7	47	161	8	26	3	-4.62817
ENST00000263635.7:132-207	ENST00000263635.7	132	207	0	8	2	-3.51096
ENST00000263635.7:181-235	ENST00000263635.7	181	235	5	1	0	3
ENST00000263635.7:201-207	ENST00000263635.7	201	207	0	5	1	-3
ENST00000263635.7:42-207	ENST00000263635.7	42	207	1	11	3	-3.60881
ENST00000263635.7:66-207	ENST00000263635.7	66	207	1	11	3	-3.60881
ENST00000263635.7:70-175	ENST00000263635.7	70	175	6	2	1	2.5025
ENST00000263635.7:72-207	ENST00000263635.7	72	207	1	11	3	-3.60881
ENST00000263635.7:85-175	ENST00000263635.7	85	175	5	2	1	2.08746
ENST00000263635.7:93-207	ENST00000263635.7	93	207	1	10	3	-3.4021
ENST00000263674.3:112-280	ENST00000263674.3	112	280	3	6	16	-3.59932
ENST00000263674.3:118-280	ENST00000263674.3	118	280	3	6	16	-3.59932
ENST00000263674.3:131-191	ENST00000263674.3	131	191	6	16	2	-3.80735
ENST00000263674.3:155-191	ENST00000263674.3	155	191	6	16	2	-3.80735
ENST00000263674.3:161-191	ENST00000263674.3	161	191	6	16	2	-3.80735
ENST00000263674.3:164-191	ENST00000263674.3	164	191	6	16	2	-3.80735
ENST00000263674.3:19-280	ENST00000263674.3	19	280	3	6	16	-3.59932
ENST00000263674.3:31-280	ENST00000263674.3	31	280	3	6	16	-3.59932
ENST00000263674.3:73-280	ENST00000263674.3	73	280	3	6	16	-3.59932
ENST00000263733.4:0-249	ENST00000263733.4	0	249	7	8	3	-1.73697
ENST00000263733.4:108-249	ENST00000263733.4	108	249	0	6	2	-3
ENST00000263733.4:114-249	ENST00000263733.4	114	249	0	6	2	-3
ENST00000263733.4:16-193	ENST00000263733.4	16	193	4	3	7	-1.51457
ENST00000263733.4:2-101	ENST00000263733.4	2	101	1	7	2	-2.848
ENST00000263733.4:30-249	ENST00000263733.4	30	249	7	7	3	1.52725
ENST00000263733.4:35-101	ENST00000263733.4	35	101	1	7	1	-3.16993
ENST00000263733.4:41-101	ENST00000263733.4	41	101	1	7	1	-3.16993
ENST00000263733.4:56-101	ENST00000263733.4	56	101	0	4	1	-2.63227
ENST00000263733.4:70-193	ENST00000263733.4	70	193	3	2	4	-0.736966
ENST00000263733.4:72-249	ENST00000263733.4	72	249	4	7	2	-1.97199
ENST00000263733.4:8-101	ENST00000263733.4	8	101	1	7	2	-2.848
ENST00000263733.4:88-193	ENST00000263733.4	88	193	3	2	4	-0.736966
ENST00000263734.4:106-253	ENST00000263734.4	106	253	6	14	16	-2.5025
ENST00000263734.4:172-253	ENST00000263734.4	172	253	3	2	14	-3.90689
ENST00000263864.9:15-90	ENST00000263864.9	15	90	4	1	1	2
ENST00000263864.9:21-90	ENST00000263864.9	21	90	4	1	1	2
ENST00000263864.9:36-90	ENST00000263864.9	36	90	4	1	1	2
ENST00000263864.9:65-134	ENST00000263864.9	65	134	7	9	0	-3.22882
ENST00000263864.9:86-134	ENST00000263864.9	86	134	6	9	0	-3.23266
ENST00000263895.8:81-174	ENST00000263895.8	81	174	0	2	15	-4.6095
ENST00000263895.8:84-174	ENST00000263895.8	84	174	0	2	15	-4.6095
ENST00000263904.4:152-332	ENST00000263904.4	152	332	3	2	4	-0.736966
ENST00000263904.4:80-332	ENST00000263904.4	80	332	3	2	4	-0.736966
ENST00000264010.8:192-417	ENST00000264010.8	192	417	25	30	37	-1.75256
ENST00000264010.8:228-417	ENST00000264010.8	228	417	25	30	37	-1.75256
ENST00000264010.8:234-417	ENST00000264010.8	234	417	22	30	37	-2.26236
ENST00000264010.8:261-417	ENST00000264010.8	261	417	15	30	27	-2.64386
ENST00000264010.8:273-417	ENST00000264010.8	273	417	10	27	27	-3.32643
ENST00000264010.8:357-417	ENST00000264010.8	357	417	5	13	3	-3.16993
ENST00000264156.2:13-55	ENST00000264156.2	13	55	4	7	0	-2.94996
ENST00000264156.2:28-55	ENST00000264156.2	28	55	2	7	0	-3.27302
ENST00000264235.12:103-130	ENST00000264235.12	103	130	9	9	1	2.95174
ENST00000264235.12:41-278	ENST00000264235.12	41	278	15	8	18	-2.27907
ENST00000264235.12:5-278	ENST00000264235.12	5	278	15	9	18	-2
ENST00000264235.12:87-387	ENST00000264235.12	87	387	4	20	19	-3.60991
ENST00000264235.12:98-278	ENST00000264235.12	98	278	14	4	17	-3.16074
ENST00000264265.3:37-94	ENST00000264265.3	37	94	8	2	6	2.16993
ENST00000264265.3:73-94	ENST00000264265.3	73	94	7	2	6	1.926
ENST00000264265.3:86-185	ENST00000264265.3	86	185	2	8	9	-2.46632
ENST00000264279.9:101-161	ENST00000264279.9	101	161	3	13	6	-3.03242
ENST00000264279.9:114-174	ENST00000264279.9	114	174	14	6	3	3.23799
ENST00000264279.9:116-161	ENST00000264279.9	116	161	2	10	6	-2.66297
ENST00000264279.9:121-139	ENST00000264279.9	121	139	3	2	9	-2.8365
ENST00000264279.9:175-214	ENST00000264279.9	175	214	1	25	4	-5.1375
ENST00000264279.9:190-214	ENST00000264279.9	190	214	1	23	4	-4.97728
ENST00000264279.9:86-161	ENST00000264279.9	86	161	5	15	6	-3
ENST00000264279.9:94-139	ENST00000264279.9	94	139	3	4	13	-3.33628
ENST00000264313.10:119-230	ENST00000264313.10	119	230	1	13	0	-4.5502
ENST00000264313.10:132-330	ENST00000264313.10	132	330	15	1	4	4.1127
ENST00000264313.10:159-330	ENST00000264313.10	159	330	15	1	4	4.1127
ENST00000264313.10:170-230	ENST00000264313.10	170	230	1	13	0	-4.5502
ENST00000264313.10:190-325	ENST00000264313.10	190	325	1	4	13	-3.80735
ENST00000264451.11:32-161	ENST00000264451.11	32	161	18	41	4	-5.09753
ENST00000264451.11:35-161	ENST00000264451.11	35	161	18	41	4	-5.09753
ENST00000264451.11:38-161	ENST00000264451.11	38	161	18	41	4	-5.09753
ENST00000264451.11:65-161	ENST00000264451.11	65	161	18	40	1	-5.31764
ENST00000264451.11:92-161	ENST00000264451.11	92	161	17	40	1	-5.34903
ENST00000264451.11:95-161	ENST00000264451.11	95	161	17	40	0	-5.44032
ENST00000264639.8:35-125	ENST00000264639.8	35	125	6	3	47	-6.03892
ENST00000264639.8:41-125	ENST00000264639.8	41	125	6	3	47	-6.03892
ENST00000264639.8:54-156	ENST00000264639.8	54	156	3	44	6	-5.91006
ENST00000264639.8:64-163	ENST00000264639.8	64	163	37	6	3	5.56125
ENST00000264645.11:113-194	ENST00000264645.11	113	194	3	17	0	-4.6837
ENST00000264645.11:128-194	ENST00000264645.11	128	194	3	14	0	-4.3346
ENST00000264645.11:137-194	ENST00000264645.11	137	194	2	8	0	-3.51096
ENST00000264663.9:104-140	ENST00000264663.9	104	140	6	2	19	-4.21378
ENST00000264663.9:68-104	ENST00000264663.9	68	104	10	43	8	-5.2854
ENST00000264663.9:71-104	ENST00000264663.9	71	104	8	33	8	-4.72848
ENST00000264663.9:93-171	ENST00000264663.9	93	171	4	21	8	-3.94145
ENST00000264710.4:146-359	ENST00000264710.4	146	359	52	35	30	2.96726
ENST00000264710.4:166-442	ENST00000264710.4	166	442	40	132	62	-5.9112
ENST00000264710.4:19-61	ENST00000264710.4	19	61	6	138	10	-7.78553
ENST00000264710.4:190-442	ENST00000264710.4	190	442	39	130	62	-5.88645
ENST00000264710.4:215-359	ENST00000264710.4	215	359	35	33	11	3.85483
ENST00000264710.4:238-442	ENST00000264710.4	238	442	23	114	53	-6.10654
ENST00000264710.4:25-61	ENST00000264710.4	25	61	6	136	10	-7.7598
ENST00000264710.4:269-359	ENST00000264710.4	269	359	28	17	9	3.47393
ENST00000264710.4:274-442	ENST00000264710.4	274	442	21	108	44	-6.15958
ENST00000264710.4:284-359	ENST00000264710.4	284	359	28	17	9	3.47393
ENST00000264710.4:316-442	ENST00000264710.4	316	442	15	99	30	-6.40301
ENST00000264710.4:320-359	ENST00000264710.4	320	359	17	3	3	4.17341
ENST00000264710.4:329-359	ENST00000264710.4	329	359	14	1	3	4.11548
ENST00000264710.4:34-61	ENST00000264710.4	34	61	6	133	10	-7.72036
ENST00000264710.4:349-442	ENST00000264710.4	349	442	15	90	28	-6.19901
ENST00000264710.4:389-428	ENST00000264710.4	389	428	58	26	4	5.68012
ENST00000264710.4:410-428	ENST00000264710.4	410	428	40	25	4	4.87945
ENST00000264710.4:416-428	ENST00000264710.4	416	428	34	25	4	4.55897
ENST00000264710.4:424-442	ENST00000264710.4	424	442	9	31	1	-5.18258
ENST00000264710.4:47-65	ENST00000264710.4	47	65	137	10	5	7.79382
ENST00000264710.4:55-61	ENST00000264710.4	55	61	5	125	8	-7.67672
ENST00000264710.4:8-65	ENST00000264710.4	8	65	142	10	6	7.83569
ENST00000264710.4:92-359	ENST00000264710.4	92	359	54	36	37	2.54465
ENST00000264716.8:249-378	ENST00000264716.8	249	378	0	13	1	-4.5502
ENST00000264716.8:279-378	ENST00000264716.8	279	378	0	11	1	-4.2854
ENST00000264716.8:294-378	ENST00000264716.8	294	378	0	11	1	-4.2854
ENST00000264716.8:352-499	ENST00000264716.8	352	499	11	8	3	2.44746
ENST00000264716.8:364-499	ENST00000264716.8	364	499	10	8	3	2.23704
ENST00000264716.8:396-642	ENST00000264716.8	396	642	10	18	12	-1.848
ENST00000264716.8:403-499	ENST00000264716.8	403	499	6	7	3	-1.39232
ENST00000264716.8:411-642	ENST00000264716.8	411	642	10	17	12	-1.58496
ENST00000264716.8:414-642	ENST00000264716.8	414	642	10	17	12	-1.58496
ENST00000264716.8:439-499	ENST00000264716.8	439	499	2	2	3	-0.36257
ENST00000264716.8:492-642	ENST00000264716.8	492	642	7	13	5	-2.36737
ENST00000264716.8:495-642	ENST00000264716.8	495	642	7	12	5	-2.08746
ENST00000264716.8:543-642	ENST00000264716.8	543	642	1	7	0	-3.55459
ENST00000264716.8:714-786	ENST00000264716.8	714	786	8	5	3	1.75489
ENST00000265056.11:168-219	ENST00000265056.11	168	219	8	0	0	4.08746
ENST00000265056.11:171-219	ENST00000265056.11	171	219	8	0	0	4.08746
ENST00000265056.11:180-219	ENST00000265056.11	180	219	8	0	0	4.08746
ENST00000265070.6:10-220	ENST00000265070.6	10	220	11	41	9	-5.02709
ENST00000265070.6:13-220	ENST00000265070.6	13	220	11	41	9	-5.02709
ENST00000265070.6:151-220	ENST00000265070.6	151	220	10	41	3	-5.53743
ENST00000265070.6:166-220	ENST00000265070.6	166	220	10	37	3	-5.31034
ENST00000265070.6:34-220	ENST00000265070.6	34	220	11	41	9	-5.02709
ENST00000265085.9:1-289	ENST00000265085.9	1	289	1	13	3	-3.96239
ENST00000265085.9:106-289	ENST00000265085.9	106	289	1	13	3	-3.96239
ENST00000265085.9:238-289	ENST00000265085.9	238	289	1	12	2	-3.98185
ENST00000265085.9:262-289	ENST00000265085.9	262	289	0	12	2	-4.22607
ENST00000265085.9:271-289	ENST00000265085.9	271	289	0	12	2	-4.22607
ENST00000265085.9:285-447	ENST00000265085.9	285	447	6	5	0	2.73039
ENST00000265085.9:55-289	ENST00000265085.9	55	289	1	13	3	-3.96239
ENST00000265085.9:82-289	ENST00000265085.9	82	289	1	13	3	-3.96239
ENST00000265087.8:1014-1299	ENST00000265087.8	1014	1299	19	12	10	2.09366
ENST00000265087.8:1035-1299	ENST00000265087.8	1035	1299	19	12	10	2.09366
ENST00000265087.8:1074-1299	ENST00000265087.8	1074	1299	19	12	10	2.09366
ENST00000265087.8:1080-1299	ENST00000265087.8	1080	1299	19	12	10	2.09366
ENST00000265087.8:1110-1299	ENST00000265087.8	1110	1299	19	12	10	2.09366
ENST00000265087.8:1146-1299	ENST00000265087.8	1146	1299	10	12	6	-1.58496
ENST00000265087.8:1209-1299	ENST00000265087.8	1209	1299	2	6	6	-1.71621
ENST00000265087.8:936-1299	ENST00000265087.8	936	1299	19	12	10	2.09366
ENST00000265087.8:990-1299	ENST00000265087.8	990	1299	19	12	10	2.09366
ENST00000265113.8:163-394	ENST00000265113.8	163	394	25	6	21	3.65271
ENST00000265113.8:241-394	ENST00000265113.8	241	394	25	6	21	3.65271
ENST00000265113.8:265-394	ENST00000265113.8	265	394	19	6	19	3.118
ENST00000265113.8:283-394	ENST00000265113.8	283	394	17	6	19	-3
ENST00000265113.8:289-394	ENST00000265113.8	289	394	17	6	19	-3
ENST00000265113.8:296-473	ENST00000265113.8	296	473	6	19	17	-3
ENST00000265113.8:314-473	ENST00000265113.8	314	473	6	18	17	-2.90454
ENST00000265113.8:320-473	ENST00000265113.8	320	473	6	17	17	-2.81762
ENST00000265113.8:323-473	ENST00000265113.8	323	473	6	17	17	-2.81762
ENST00000265113.8:343-394	ENST00000265113.8	343	394	14	5	9	2.42146
ENST00000265113.8:347-473	ENST00000265113.8	347	473	5	9	11	-1.69599
ENST00000265113.8:381-441	ENST00000265113.8	381	441	2	11	1	-3.80735
ENST00000265113.8:383-473	ENST00000265113.8	383	473	1	1	8	-3.43296
ENST00000265138.3:121-136	ENST00000265138.3	121	136	0	13	0	-4.75489
ENST00000265138.3:130-136	ENST00000265138.3	130	136	0	5	0	-3.45943
ENST00000265138.3:60-147	ENST00000265138.3	60	147	0	0	13	-4.75489
ENST00000265293.8:106-277	ENST00000265293.8	106	277	13	34	10	-4.24793
ENST00000265293.8:143-365	ENST00000265293.8	143	365	34	9	12	4.41463
ENST00000265293.8:16-277	ENST00000265293.8	16	277	16	34	12	-3.83697
ENST00000265293.8:181-277	ENST00000265293.8	181	277	11	34	4	-4.96177
ENST00000265293.8:210-426	ENST00000265293.8	210	426	8	11	34	-4.57928
ENST00000265293.8:222-426	ENST00000265293.8	222	426	8	10	34	-4.65271
ENST00000265293.8:253-277	ENST00000265293.8	253	277	10	31	4	-4.79701
ENST00000265293.8:259-277	ENST00000265293.8	259	277	10	31	4	-4.79701
ENST00000265293.8:265-277	ENST00000265293.8	265	277	10	31	4	-4.79701
ENST00000265293.8:36-426	ENST00000265293.8	36	426	16	16	34	-3.43539
ENST00000265293.8:77-365	ENST00000265293.8	77	365	34	13	13	3.97269
ENST00000265293.8:95-365	ENST00000265293.8	95	365	34	11	13	4.15325
ENST00000265339.6:334-397	ENST00000265339.6	334	397	1	7	2	-2.848
ENST00000265340.11:25-166	ENST00000265340.11	25	166	5	5	9	-1.4245
ENST00000265340.11:37-166	ENST00000265340.11	37	166	5	5	9	-1.4245
ENST00000265340.11:40-166	ENST00000265340.11	40	166	5	5	9	-1.4245
ENST00000265340.11:47-326	ENST00000265340.11	47	326	5	21	5	-4.13061
ENST00000265340.11:51-72	ENST00000265340.11	51	72	2	2	0	1.58496
ENST00000265340.11:53-326	ENST00000265340.11	53	326	4	20	5	-4.1392
ENST00000265340.11:60-72	ENST00000265340.11	60	72	2	2	0	1.58496
ENST00000265340.11:80-326	ENST00000265340.11	80	326	4	17	2	-4.19411
ENST00000265343.9:155-359	ENST00000265343.9	155	359	5	17	6	-3.39232
ENST00000265343.9:17-359	ENST00000265343.9	17	359	9	17	6	-2.82018
ENST00000265343.9:209-359	ENST00000265343.9	209	359	0	16	3	-4.57544
ENST00000265343.9:302-359	ENST00000265343.9	302	359	0	16	1	-4.87543
ENST00000265343.9:308-359	ENST00000265343.9	308	359	0	16	1	-4.87543
ENST00000265343.9:344-359	ENST00000265343.9	344	359	0	16	1	-4.87543
ENST00000265343.9:53-359	ENST00000265343.9	53	359	8	17	6	-2.93455
ENST00000265361.7:312-435	ENST00000265361.7	312	435	18	17	1	4.01495
ENST00000265361.7:316-484	ENST00000265361.7	316	484	18	2	15	3.74416
ENST00000265361.7:342-435	ENST00000265361.7	342	435	14	15	1	-3.72247
ENST00000265361.7:361-484	ENST00000265361.7	361	484	16	2	15	3.59585
ENST00000265465.7:347-380	ENST00000265465.7	347	380	9	0	1	3.96347
ENST00000265465.7:368-380	ENST00000265465.7	368	380	8	0	0	4.08746
ENST00000265465.7:371-380	ENST00000265465.7	371	380	8	0	0	4.08746
ENST00000265643.3:134-143	ENST00000265643.3	134	143	3	3	0	2
ENST00000265643.3:29-143	ENST00000265643.3	29	143	3	3	1	1.09954
ENST00000265866.11:19-127	ENST00000265866.11	19	127	53	168	5	-7.54901
ENST00000265866.11:28-127	ENST00000265866.11	28	127	53	168	5	-7.54901
ENST00000265866.11:34-127	ENST00000265866.11	34	127	47	144	4	-7.31511
ENST00000265866.11:38-95	ENST00000265866.11	38	95	104	2	34	6.87809
ENST00000265866.11:50-95	ENST00000265866.11	50	95	97	2	34	6.73333
ENST00000265866.11:52-127	ENST00000265866.11	52	127	46	134	3	-7.2016
ENST00000265866.11:66-138	ENST00000265866.11	66	138	2	17	77	-6.63572
ENST00000265866.11:75-138	ENST00000265866.11	75	138	2	13	63	-6.36296
ENST00000265866.11:91-127	ENST00000265866.11	91	127	12	39	2	-5.40843
ENST00000265866.11:96-138	ENST00000265866.11	96	138	2	12	38	-5.35213
ENST00000265896.9:283-733	ENST00000265896.9	283	733	16	12	14	0.652077
ENST00000265896.9:286-733	ENST00000265896.9	286	733	16	12	14	0.652077
ENST00000265896.9:304-733	ENST00000265896.9	304	733	15	10	14	1.05445
ENST00000265896.9:361-733	ENST00000265896.9	361	733	13	8	14	-1.47063
ENST00000265896.9:388-733	ENST00000265896.9	388	733	13	8	14	-1.47063
ENST00000265896.9:457-733	ENST00000265896.9	457	733	13	8	11	1.12928
ENST00000265896.9:485-740	ENST00000265896.9	485	740	8	11	13	-1.12928
ENST00000265896.9:497-740	ENST00000265896.9	497	740	8	11	13	-1.12928
ENST00000265896.9:503-740	ENST00000265896.9	503	740	8	10	13	-1.15433
ENST00000265896.9:506-740	ENST00000265896.9	506	740	8	10	13	-1.15433
ENST00000265896.9:526-733	ENST00000265896.9	526	733	13	8	7	1.6845
ENST00000265981.6:34-127	ENST00000265981.6	34	127	2	6	31	-5.2854
ENST00000265981.6:46-127	ENST00000265981.6	46	127	2	6	31	-5.2854
ENST00000265981.6:73-127	ENST00000265981.6	73	127	2	6	31	-5.2854
ENST00000265981.6:80-89	ENST00000265981.6	80	89	6	29	2	-5.147
ENST00000266000.10:106-148	ENST00000266000.10	106	148	4	2	2	1
ENST00000266000.10:113-158	ENST00000266000.10	113	158	2	3	4	-0.736966
ENST00000266000.10:137-158	ENST00000266000.10	137	158	2	3	1	-1
ENST00000266000.10:144-192	ENST00000266000.10	144	192	3	0	1	2.16993
ENST00000266000.10:54-192	ENST00000266000.10	54	192	3	4	2	-0.736966
ENST00000266000.10:61-148	ENST00000266000.10	61	148	4	2	2	1
ENST00000266000.10:66-192	ENST00000266000.10	66	192	3	4	2	-0.736966
ENST00000266000.10:72-192	ENST00000266000.10	72	192	3	4	2	-0.736966
ENST00000266000.10:96-192	ENST00000266000.10	96	192	3	4	2	-0.736966
ENST00000266025.3:181-436	ENST00000266025.3	181	436	16	8	19	-2.46248
ENST00000266025.3:220-436	ENST00000266025.3	220	436	14	6	18	-2.7855
ENST00000266025.3:241-436	ENST00000266025.3	241	436	14	5	5	2.9542
ENST00000266025.3:250-436	ENST00000266025.3	250	436	14	5	5	2.9542
ENST00000266025.3:272-482	ENST00000266025.3	272	482	6	5	14	-2.774
ENST00000266025.3:286-436	ENST00000266025.3	286	436	14	4	5	3.15592
ENST00000266025.3:300-444	ENST00000266025.3	300	444	5	14	6	-2.774
ENST00000266025.3:348-444	ENST00000266025.3	348	444	5	14	4	-3.15592
ENST00000266025.3:351-444	ENST00000266025.3	351	444	5	14	4	-3.15592
ENST00000266025.3:62-245	ENST00000266025.3	62	245	7	18	6	-3.26012
ENST00000266025.3:74-245	ENST00000266025.3	74	245	7	18	6	-3.26012
ENST00000266025.3:93-159	ENST00000266025.3	93	159	2	0	2	1.58496
ENST00000266025.3:97-169	ENST00000266025.3	97	169	3	4	4	-0.241008
ENST00000266079.4:19-91	ENST00000266079.4	19	91	6	13	6	-2.29866
ENST00000266079.4:28-91	ENST00000266079.4	28	91	1	7	5	-2.40808
ENST00000266079.4:9-42	ENST00000266079.4	9	42	8	6	12	-1.65711
ENST00000266263.9:101-140	ENST00000266263.9	101	140	2	7	0	-3.27302
ENST00000266263.9:134-140	ENST00000266263.9	134	140	2	6	0	-3
ENST00000266263.9:38-140	ENST00000266263.9	38	140	2	7	0	-3.27302
ENST00000266263.9:68-140	ENST00000266263.9	68	140	2	7	0	-3.27302
ENST00000266458.9:119-233	ENST00000266458.9	119	233	51	72	7	-5.69445
ENST00000266458.9:175-244	ENST00000266458.9	175	244	48	67	45	-2.66391
ENST00000266458.9:194-233	ENST00000266458.9	194	233	44	36	7	4.76224
ENST00000266458.9:197-233	ENST00000266458.9	197	233	43	30	7	4.69627
ENST00000266458.9:212-233	ENST00000266458.9	212	233	36	11	6	4.91864
ENST00000266458.9:218-233	ENST00000266458.9	218	233	36	11	6	4.91864
ENST00000266458.9:229-244	ENST00000266458.9	229	244	47	54	10	-4.96422
ENST00000266458.9:41-233	ENST00000266458.9	41	233	51	72	7	-5.69445
ENST00000266458.9:44-233	ENST00000266458.9	44	233	51	72	7	-5.69445
ENST00000266458.9:8-233	ENST00000266458.9	8	233	51	72	7	-5.69445
ENST00000266589.10:151-583	ENST00000266589.10	151	583	1	27	0	-5.67847
ENST00000266589.10:169-583	ENST00000266589.10	169	583	1	27	0	-5.67847
ENST00000266589.10:208-583	ENST00000266589.10	208	583	1	27	0	-5.67847
ENST00000266589.10:247-583	ENST00000266589.10	247	583	1	26	0	-5.62124
ENST00000266589.10:262-583	ENST00000266589.10	262	583	1	24	0	-5.49953
ENST00000266589.10:334-583	ENST00000266589.10	334	583	1	20	0	-5.22055
ENST00000266589.10:349-583	ENST00000266589.10	349	583	1	17	0	-4.96963
ENST00000266673.9:105-390	ENST00000266673.9	105	390	6	5	2	1.58496
ENST00000266673.9:153-390	ENST00000266673.9	153	390	6	5	2	1.58496
ENST00000266673.9:176-311	ENST00000266673.9	176	311	1	6	0	-3.30117
ENST00000266673.9:213-390	ENST00000266673.9	213	390	6	5	2	1.58496
ENST00000266673.9:222-390	ENST00000266673.9	222	390	6	5	2	1.58496
ENST00000266673.9:227-311	ENST00000266673.9	227	311	1	6	0	-3.30117
ENST00000266673.9:234-390	ENST00000266673.9	234	390	5	5	2	1.32193
ENST00000266673.9:238-319	ENST00000266673.9	238	319	1	1	3	-1.37851
ENST00000266673.9:267-390	ENST00000266673.9	267	390	3	5	2	-1.26303
ENST00000266673.9:271-319	ENST00000266673.9	271	319	1	1	3	-1.37851
ENST00000266673.9:452-509	ENST00000266673.9	452	509	4	0	1	2.63227
[truncated: 28,032 more rows]

## Sheet: DHX9 samples
uORF_id	TransID	uORFstart	uORFstop	frame1_DHX9	frame2_DHX9	frame3_DHX9	DHX9_uORFScore
[truncated: 27,874 more rows]
